# Supplementary material for: The Cultured Microbiome of Pollinated Maize Silks Shifts after Infection with Fusarium graminearum and Varies by Distance from the Site of Pathogen Inoculation
Source: Pathogens. 2023 Nov 6;12(11):1322. doi: 10.3390/pathogens12111322 (PMC10675081; doi:10.3390/pathogens12111322)
Supplement: Supplementary file 1 [file pathogens-12-01322-s001.zip › pathogens-2672130-supplementary.xlsx]

## Sheet: TableS1
Isolate ID	GenBank Accession Number	Sequencing Code	Originated from Control Or Experimental Silks	Originally cultured on LB agar (L) Or PDA (P)	Maize genotype	Silk Tip (T) Or Base (B)	Forward primer	Number of Ns in 16S sequence	Number of Ns divided by Length of sequence	Contig	Sequence Length	Phylum	Class	Order	Family	High stringency genus prediction	High stringency species prediction	Max. Score	Percent identity	Moderate stringency species prediction	Moderate stringency genus prediction	Cultured OTU	Match With V4-MiSeq Core/Indicator OTU	100% Match With V4-MiSeq Core/Indicator OTU.	Less Than 100% Match With V4-MiSeq Core/Indicator OTU.	Percent Match With V4-MiSeq Core/Indicator OTU.	Mismatches With V4-MiSeq Core/Indicator OTU, for those that met thresholds
L1-4CB-C	OM164312	N66	Control/Healthy Silks	L	CO432	B	27F	0	0	GTCGAACGGTAGCACAGAGAGCTTGCTCTCGGGTGACGAGTGGCGGACGGGTGAGTAATGTCTGGGAAACTGCCTGATGGAGGGGGATAACTACTGGAAACGGTAGCTAATACCGCATAACGTCGCAAGACCAAAGAGGGGGACCTTCGGGCCTCTTGCCATCAGATGTGCCCAGATGGGATTAGCTAGTAGGTGGGGTAACGGCTCACCTAGGCGACGATCCCTAGCTGGTCTGAGAGGATGACCAGCCACACTGGAACTGAGACACGGTCCAGACTCCTACGGGAGGCAGCAGTGGGGAATATTGCACAATGGGCGCAAGCCTGATGCAGCCATGCCGCGTGTATGAAGAAGGCCTTCGGGTTGTAAAGTACTTTCAGCGGGGAGGAAGGCGATAAG…	1403	Pseudomonadota	Gammaproteobacteria	Enterobacterales	Enterobacteriaceae	Klebsiella	Klebsiella oxytoca	2514	99.71	Klebsiella oxytoca	Klebsiella	140	OTU17	OTU17	0	100	None
L1-19CT-D	MT777210	Q10	Control/Healthy Silks	L	P9855HR	T	27F	5	0.00354862	ATGCAAGTCGAACGGTAGCACAGAGAGCTTGCTCTCGGGTGACGAGTGGCGGACGGGTGAGTAATGTCTGGGAAACTGCCTGATGGAGGGGGATAACTACTGGAAACGGTAGCTAATACCGCATAACGTCGCAAGACCAAAGAGGGGGACCTTCGGGCCTCTTGCCATCAGATGTGCCCAGATGGGATTAGCTAGTAGGTGGGGTAACGGCTCACCTAGGCGACGATCCCTAGCTGGTCTGAGAGGATGACCAGCCACACTGGAACTGAGACACGGTCCAGACTCCTACGGGAGGCAGCAGTGGGGAATATTGCACAATGGGCGCAAGCCTGATGCAGCCATGCCGCGTGTATGAAGAAGGCCTTCGGGTTGTAAAGTACTTTCAGCGGGGAGGAAGGN…	1409	Pseudomonadota	Gammaproteobacteria	Enterobacterales	Enterobacteriaceae	Klebsiella	Klebsiella grimontii	2567	99.43	Klebsiella grimontii	Klebsiella	130&138	OTU17	0	OTU17	99.61	1 N mismatch
P1-18CT-B	MT777214	Q36	Control/Healthy Silks	P	P38157	T	27F	2	0.00141844	TGCAGTCGAACGGTAGCACAGAGAGCTTGCTCTCGGGTGACGAGTGGCGGACGGGTGAGTAATGTCTGGGAAACTGCCTGATGGAGGGGGATAACTACTGGAAACGGTAGCTAATACCGCATAACGTCGCAAGACCAAAGAGGGGGACCTTCGGGCCTCTTGCCATCAGATGTGCCCAGATGGGATTAGCTAGTAGGTGGGGTAACGGCTCACCTAGGCGACGATCCCTAGCTGGTCTGAGAGGATGACCAGCCACACTGGAACTGAGACACGGTCCAGACTCCTACGGGAGGCAGCAGTGGGGAATATTGCACAATGGGCGCAAGCCTGATGCAGCCATGCCGCGTGTATGAAGAAGGCCTTCGGGTTGTAAAGTACTTTCAGCGGGGAGGAAGGNAA…	1410	Pseudomonadota	Gammaproteobacteria	Enterobacterales	Enterobacteriaceae	Klebsiella	Klebsiella grimontii	2575	99.5	Klebsiella grimontii	Klebsiella	130	OTU17	OTU17	0	100	None
P1-18CT-D	MT355339	Q37	Control/Healthy Silks	P	P38157	T	27F	3	0.0021322	ATGCAGTCGAACGGTAGCACAGAGAGCTTGCTCTCGGGTGACGAGTGGCGGACGGGTGAGTAATGTCTGGGAAACTGCCTGATGGAGGGGGATAACTACTGGAAACGGTAGCTAATACCGCATAACGTCGCAAGACCAAAGAGGGGGACCTTCGGGCCTCTTGCCATCAGATGTGCCCAGATGGGATTAGCTAGTAGGTGGGGTAACGGCTCACCTAGGCGACGATCCCTAGCTGGTCTGAGAGGATGACCAGCCACACTGGAACTGAGACACGGTCCAGACTCCTACGGGAGGCAGCAGTGGGGAATATTGCACAATGGGCGCAAGCCTGATGCAGCCATGCCGCGTGTATGAAGAAGGCCTTCGGGTTGTAAAGTACTTTCAGCGGGGAGGAAGGNN…	1407	Pseudomonadota	Gammaproteobacteria	Enterobacterales	Enterobacteriaceae	Klebsiella	Klebsiella grimontii	2569	99.5	Klebsiella grimontii	Klebsiella	130&138	OTU17	OTU17	0	100	None
P1-5CT-L	MT355341	U09	Control/Healthy Silks	P	CO431	T	27F	1	0.000710732	CATGCAAGTCGAACGGTAGCACAGAGAGCTTGCTCTCGGGTGACGAGTGGCGGACGGGTGAGTAATGTCTGGGAAACTGCCTGATGGAGGGGGATAACTACTGGAAACGGTAGCTAATACCGCATAACGTCGCAAGACCAAAGAGGGGGACCTTCGGGCCTCTTGCCATCAGATGTGCCCAGATGGGATTAGCTAGTAGGTGGGGTAACGGCTCACCTAGGCGACGATCCCTAGCTGGTCTGAGAGGATGACCAGCCACACTGGAACTGAGACACGGTCCAGACTCCTACGGGAGGCAGCAGTGGGGAATATTGCACAATGGGCGCAAGCCTGATGCAGCCATGCCGCGTGTATGAAGAAGGCCTTCGGGTTGTAAAGTACTTTCAGCGGGGAGGAAGG…	1407	Pseudomonadota	Gammaproteobacteria	Enterobacterales	Enterobacteriaceae	Klebsiella	Klebsiella grimontii	2575	99.64	Klebsiella grimontii	Klebsiella	130	OTU17	OTU17	0	100	None
L1-11ET-D	MT355336	L16	Experimental/Fg-treated Silks	L	CO452	T	27F	5	0.00355872	CATGCAGTCGNACGGTAGCACANAGAGCTTGCTCTCGGGTGACGAGTGGCGGACGGGTGAGTAATGTCTGGGAAACTGCCTGATGGAGGGGGATAACTACTGGAAACGGTAGCTAATACCGCATAACGTCGCAAGACCAAAGAGGGGGACCTTCGGGCCTCTTGCCATCAGATGTGCCCAGATGGGATTAGCTAGTAGGTGGGGTAACGGCTCACCTAGGCGACGATCCCTAGCTGGTCTGAGAGGATGACCAGCCACACTGGAACTGAGACACGGTCCAGACTCCTACGGGAGGCAGCAGTGGGGAATATTGCACAATGGGCGCAAGCCTGATGCAGCCATGCCGCGTGTATGAAGAAGGCCTTCGGGTTGTAAAGTACTTTCAGCGGGGAGGAAGGC…	1405	Pseudomonadota	Gammaproteobacteria	Enterobacterales	Enterobacteriaceae	Klebsiella	Klebsiella grimontii	2498	99.29	Klebsiella grimontii	Klebsiella	132	OTU17	OTU17	0	100	None
L1-11ET-C	MT355337	L24	Experimental/Fg-treated Silks	L	CO452	T	27F	3	0.00212615	CATGCAGTCGAACGGTAGCACAGAGAGCTTGCTCTCGGGTGACGAGTGGCGGACGGGTGAGTAATGTCTGGGAAACTGCCTGATGGAGGGGGATAACTACTGGAAACGGTAGCTAATACCGCATAACGTCGCAAGACCAAAGAGGGGGACCTTCGGGCCTCTTGCCATCAGATGTGCCCAGATGGGATTAGCTAGTAGGTGGGGTAACGGCTCACCTAGGCGACGATCCCTAGCTGGTCTGAGAGGATGACCAGCCACACTGGAACTGAGACACGGTCCAGACTCCTACGGGAGGCAGCAGTGGGGAATATTGCACAATGGGCGCAAGCCTGATGCAGCCATGCCGCGTGTATGAAGAAGGCCTTCGGGTTGTAAAGTACTTTCAGCGGGGAGGAAGGC…	1411	Pseudomonadota	Gammaproteobacteria	Enterobacterales	Enterobacteriaceae	Klebsiella	Klebsiella grimontii	2509	99.36	Klebsiella grimontii	Klebsiella	130	OTU17	OTU17	0	100	None
P1-3ET-I	MT308737	L29	Experimental/Fg-treated Silks	P	CO433	T	27F	3	0.00212314	CATGCAGTCGAACGGTAGCACAGAGAGCTTGCTCTCGGGTGACGAGTGGCGGACGGGTGAGTAATGTCTGGGAAACTGCCTGATGGAGGGGGATAACTACTGGAAACGGTAGCTAATACCGCATAACGTCGCAAGACCAAAGAGGGGGACCTTCGGGCCTCTTGCCATCAGATGTGCCCAGATGGGATTAGCTAGTAGGTGGGGTAACGGCTCACCTAGGCGACGATCCCTAGCTGGTCTGAGAGGATGACCAGCCACACTGGAACTGAGACACGGTCCAGACTCCTACGGGAGGCAGCAGTGGGGAATATTGCACAATGGGCGCAAGCCTGATGCAGCCATGCCGCGTGTATGAAGAAGGCCTTCGGGTTGTAAAGTACTTTCAGCGGGGAGGAAGGN…	1413	Pseudomonadota	Gammaproteobacteria	Enterobacterales	Enterobacteriaceae	Klebsiella	Klebsiella grimontii	2519	99.43	Klebsiella grimontii	Klebsiella	130&138	OTU17	OTU17	0	100	None
P1-3ET-C	MT777198	M21	Experimental/Fg-treated Silks	P	CO433	T	27F	9	0.00652174	ATGCNAGTCGAACGGTAGCACANAGAGCTTGCTCTCGGGTGACGAGTGGCGGACGGGTGAGTAATGTCTGGGAAACTGCCTGATGGAGGGGGATAACTACTGGAAACGGTAGCTAATACCGCATAACGTCGCAAGACCAAAGAGGGGGACCTTCGGGCCTCTTGCCATCAGATGTGCCCAGATGGGATTAGCTAGTAGGTGGGGTAACGGCTCACCTAGGCGACGATCCCTAGCTGGTCTGAGAGGATGACCAGCCACACTGGAACTGAGACACGGTCCAGACTCCTACGGGAGGCAGCAGTGGGGAATATTGCACAATGGGCGCAAGCCTGATGCAGCCATGCCGCGTGTATGAAGAAGGCCTTCGGGTTGTAAAGTACTTTCAGCGGGGAGGAAGGN…	1380	Pseudomonadota	Gammaproteobacteria	Enterobacterales	Enterobacteriaceae	Klebsiella	Klebsiella grimontii	2505	99.13	Klebsiella grimontii	Klebsiella	130&138	OTU17	0	OTU17	99.21	2 N mismatches
P1-3ET-W	MT355338	M40	Experimental/Fg-treated Silks	P	CO433	T	27F	2	0.00142349	ATGCAGTCGAACGGTAGCACAGAGAGCTTGCTCTCGGGTGACGAGTGGCGGACGGGTGAGTAATGTCTGGGAAACTGCCTGATGGAGGGGGATAACTACTGGAAACGGTAGCTAATACCGCATAACGTCGCAAGACCAAAGAGGGGGACCTTCGGGCCTCTTGCCATCAGATGTGCCCAGATGGGATTAGCTAGTAGGTGGGGTAACGGCTCACCTAGGCGACGATCCCTAGCTGGTCTGAGAGGATGACCAGCCACACTGGAACTGAGACACGGTCCAGACTCCTACGGGAGGCAGCAGTGGGGAATATTGCACAATGGGCGCAAGCCTGATGCAGCCATGCCGCGTGTATGAAGAAGGCCTTCGGGTTGTAAAGTACTTTCAGCGGGGAGGAAGGNN…	1405	Pseudomonadota	Gammaproteobacteria	Enterobacterales	Enterobacteriaceae	Klebsiella	Klebsiella grimontii	2571	99.57	Klebsiella grimontii	Klebsiella	130&138	OTU17	OTU17	0	100	None
P1-3ET-H	MT777201	M43	Experimental/Fg-treated Silks	P	CO433	T	27F	14	0.00992908	CATGCAAGTCGAACGGTAGCACAGAGAGCTTGCTCTCGGGTGACGAGTGGCGGACGGGTGAGTAATGTCTGGGAAACTGCCTGATGGAGGGGGATAACTACTGGAAACGGTAGCTAATACCGCATAACGTCGCAAGACCAAAGAGGGGGACCTTCGGGCCTCTTGCCATCAGATGTGCCCAGATGGGATTAGCTAGTAGGTGGGGTAACGGCTCACCTAGGCGACGATCCCTAGCTGGTCTGAGAGGATGACCAGCCACACTGGAACTGAGACACGGTCCAGACTCCTACGGGAGGCAGCAGTGGGGAATATTGCACAATGGGCGCAAGCCTGATGCAGCCATGCCGCGTGTATGAAGAAGGCCTTCGGGTTGTAAAGTACTTTCAGCGGGGAGGAAGG…	1410	Pseudomonadota	Gammaproteobacteria	Enterobacterales	Enterobacteriaceae	Klebsiella	Klebsiella grimontii	2542	98.79	Klebsiella grimontii	Klebsiella	130&132&133&138&407	OTU17	0	OTU17	96.85	8 N mismatches
P1-4ET-I	OM164402	Q28	Experimental/Fg-treated Silks	P	CO432	T	27F	3	0.00212615	TGCAAGTCGAACGGTAGCACAGAGAGCTTGCTCTCGGGTGACGAGTGGCGGACGGGTGAGTAATGTCTGGGAAACTGCCTGATGGAGGGGGATAACTACTGGAAACGGTAGCTAATACCGCATAACGTCGCAAGACCAAAGAGGGGGACCTTCGGGCCTCTTGCCATCAGATGTGCCCAGATGGGATTAGCTAGTAGGTGGGGTAACGGCTCACCTAGGCGACGATCCCTAGCTGGTCTGAGAGGATGACCAGCCACACTGGAACTGAGACACGGTCCAGACTCCTACGGGAGGCAGCAGTGGGGAATATTGCACAATGGGCGCAAGCCTGATGCAGCCATGCCGCGTGTATGAAGAAGGCCTTCGGGTTGTAAAGTACTTTCAGCGGGGAGGAAGGNN…	1411	Pseudomonadota	Gammaproteobacteria	Enterobacterales	Enterobacteriaceae	Klebsiella	Klebsiella grimontii	2584	99.57	Klebsiella grimontii	Klebsiella	130&138	OTU17	OTU17	0	100	None
P1-4ET-H	OM164403	Q29	Experimental/Fg-treated Silks	P	CO432	T	27F	2	0.00144404	AGTCGAACGGTAGCACAGAGAGCTTGCTCTCGGGTGACGAGTGGCGGACGGGTGAGTAATGTCTGGGAAACTGCCTGATGGAGGGGGATAACTACTGGAAACGGTAGCTAATACCGCATAACGTCGCAAGACCAAAGAGGGGGACCTTCGGGCCTCTTGCCATCAGATGTGCCCAGATGGGATTAGCTAGTAGGTGGGGTAACGGCTCACCTAGGCGACGATCCCTAGCTGGTCTGAGAGGATGACCAGCCACACTGGAACTGAGACACGGTCCAGACTCCTACGGGAGGCAGCAGTGGGGAATATTGCACAATGGGCGCAAGCCTGATGCAGCCATGCCGCGTGTATGAAGAAGGCCTTCGGGTTGTAAAGTACTTTCAGCGGGGAGGAAGGNNATAA…	1385	Pseudomonadota	Gammaproteobacteria	Enterobacterales	Enterobacteriaceae	Klebsiella	Klebsiella grimontii	2540	99.64	Klebsiella grimontii	Klebsiella	130&138	OTU17	OTU17	0	100	None
L1-4ET-B	MT308746	Q50	Experimental/Fg-treated Silks	L	CO432	T	27F	4	0.00295639	GCTTGCTCTCGGGTGACGAGTGGCGGACGGGTGAGTAATGTCTGGGAAACTGCCTGATGGAGGGGGATAACTACTGGAAACGGTAGCTAATACCGCATAACGTCGCAAGACCAAAGAGGGGGACCTTCGGGCCTCTTGCCATCAGATGTGCCCAGATGGGATTAGCTAGTAGGTGGGGTAACGGCTCACCTAGGCGACGATCCCTAGCTGGTCTGAGAGGATGACCAGCCACACTGGAACTGAGACACGGTCCAGACTCCTACGGGAGGCAGCAGTGGGGAATATTGCACAATGGGCGCAAGCCTGATGCAGCCATGCCGCGTGTATGAAGAAGGCCTTCGGGTTGTAAAGTACTTTCAGCGGGGAGGAAGGGAATAAGGTTAATAACCTTGTNCATTG…	1353	Pseudomonadota	Gammaproteobacteria	Enterobacterales	Enterobacteriaceae	Klebsiella	Klebsiella grimontii	2466	99.41	Klebsiella grimontii	Klebsiella	130&397	OTU17	OTU17	0	100	None
P1-4ET-C	OM164428	R23	Experimental/Fg-treated Silks	P	CO432	T	27F	6	0.00425834	TGCAGTCGAACGGTAGCACAGAGAGCTTGCTCTCGGGTGACGAGTGGCGGACGGGTGAGTAATGTCTGGGAAACTGCCTGATGGAGGGGGATAACTACTGGAAACGGTAGCTAATACCGCATAACGTCGCAAGACCAAAGAGGGGGACCTTCGGGCCTCTTGCCATCAGATGTGCCCAGATGGGATTAGCTAGTAGGTGGGGTAACGGCTCACCTAGGCGACGATCCCTAGCTGGTCTGAGAGGATGACCAGCCACACTGGAACTGAGACACGGTCCAGACTCCTACGGGAGGCAGCAGTGGGGAATATTGCACAATGGGCGCAAGCCTGATGCAGCCATGCCGCGTGTATGAAGAAGGCCTTCGGGTTGTAAAGTACTTTCAGCGGGGAGGAAGGCNA…	1409	Pseudomonadota	Gammaproteobacteria	Enterobacterales	Enterobacteriaceae	Klebsiella	Klebsiella grimontii	2500	99.29	Klebsiella grimontii	Klebsiella	130&132&133&138&407	OTU17	OTU17	0	100	None
L1-18ET-H	MT777223	R63	Experimental/Fg-treated Silks	L	P38157	T	27F	5	0.00357143	AGTCGAACGGTAGCACAGAGAGCTTGCTCTCGGGTGACGAGTGGCGGACGGGTGAGTAATGTCTGGGAAACTGCCTGATGGAGGGGGATAACTACTGGAAACGGTAGCTAATACCGCATAACGTCGCAAGACCAAAGAGGGGGACCTTCGGGCCTCTTGCCATCAGATGTGCCCAGATGGGATTAGCTAGTAGGTGGGGTAACGGCTCACCTAGGCGACGATCCCTAGCTGGTCTGAGAGGATGACCAGCCACACTGGAACTGAGACACGGTCCAGACTCCTACGGGAGGCAGCAGTGGGGAATATTGCACAATGGGCGCAAGCCTGATGCAGCCATGCCGCGTGTATGAAGAAGGCCTTCGGGTTGTAAAGTACTTTCAGCGGGGAGGAAGGNAATAA…	1400	Pseudomonadota	Gammaproteobacteria	Enterobacterales	Enterobacteriaceae	Klebsiella	Klebsiella grimontii	2545	99.36	Klebsiella grimontii	Klebsiella	130&136&138	OTU17	0	OTU17	99.21	2 N mismatches
L1-19ET-I	OM241044	R74	Experimental/Fg-treated Silks	L	P9855HR	T	27F	14	0.0141988	TGGTAAGCGCCCTCCCGAAGGTTAAGCTACCTACTTCTTTTGCAACCCACTCCCATGGTGTGACGGGCGGTGTGTACAAGGCCCGGGAACGTATTCACCGTGGCATTCTGATCCACGATTACTAGCGATTCCGACTTCATGGAGTCGAGTTGCAGACTCCAATCCGGACTACGACATACTTTATGAGGTCCGCTTGCTCTCGCGAGGTCGCTTCTCTTTGTATATGCCATTGTAGCACGTGTGTAGCCCTACTCGTAAGGGCCATGATGACTTGACGTCATCCCCACCTTCCTCCAGTTTATCACTGGCAGTCTCCTTTGAGTTCCCGACCGAANCGCTGGCAACAAAGGATAAGGGTTGCGCTCGTTGCGGGACTTAACCCAACATTTCACAACACGA…	986	Pseudomonadota	Gammaproteobacteria	Enterobacterales	Enterobacteriaceae	Klebsiella	Klebsiella oxytoca	1718	98.58	Klebsiella oxytoca	Klebsiella	133&140	OTU17	0	OTU17	97.24	7 N mismatches
P1-18ET-F	MT355328	S46	Experimental/Fg-treated Silks	P	P38157	T	27F	8	0.00959233	TGCAGTCGAACGGTAGCACAGAGAGCTTGCTCTCGGGTGACGAGTGGCGGACGGGTGAGTAATGTCTGGGAAACTGCCTGATGGAGGGGGATAACTACTGGAAACGGTAGCTAATACCGCATAACGTCGCAAGACCAAAGAGGGGGACCTTCGGGCCTCTTGCCATCAGATGTGCCCAGATGGGATTAGCTAGTAGGTGGGGTAACGGCTCACCTAGGCGACGATCCCTAGCTGGTCTGAGAGGATGACCAGCCACACTGGAACTGAGACACGGTCCAGACTCCTACGGGAGGCAGCAGTGGGGAATATTGCACAATGGGCGCAAGCCTGATGCAGCCATGCCGCGTGTATGAAGAAGGCCTTCGGGTTGTAAAGTACTTTCAGCGGGGAGGAAGGNNN…	834	Pseudomonadota	Gammaproteobacteria	Enterobacterales	Enterobacteriaceae	0	0	1495	98.56	Klebsiella michiganensis/ Klebsiella grimontii	Klebsiella	140&132&408	OTU17	0	OTU17	99.61	1 N mismatch
L1-19ET-B	MT355340	S51	Experimental/Fg-treated Silks	L	P9855HR	T	27F	4	0.00284495	TGCAGTCGAACGGTAGCACANGAGAGCTTGCTCTCGGGTGACGAGTGGCGGACGGGTGAGTAATGTCTGGGAAACTGCCTGATGGAGGGGGATAACTACTGGAAACGGTAGCTAATACCGCATAACGTCGCAAGACCAAAGAGGGGGACCTTCGGGCCTCTTGCCATCAGATGTGCCCAGATGGGATTAGCTAGTAGGTGGGGTAACGGCTCACCTAGGCGACGATCCCTAGCTGGTCTGAGAGGATGACCAGCCACACTGGAACTGAGACACGGTCCAGACTCCTACGGGAGGCAGCAGTGGGGAATATTGCACAATGGGCGCAAGCCTGATGCAGCCATGCCGCGTGTATGAAGAAGGCCTTCGGGTTGTAAAGTACTTTCAGCGGGGAGGAAGGNN…	1406	Pseudomonadota	Gammaproteobacteria	Enterobacterales	Enterobacteriaceae	Klebsiella	Klebsiella grimontii	2555	99.36	Klebsiella grimontii	Klebsiella	129	OTU17	OTU17	0	100	None
P1-8ET-E	OM241013	T37	Experimental/Fg-treated Silks	P	CO325	T	27F	27	0.0259366	AGTCGAACGGTAGCACAGAGAGCTTGCTCTCGGGTGACGAGTGGCGGACGGGTGAGTAATGTCTGGGAAACTGCCTGATGGAGGGGGATAACTACTGGAAACGGTAGCTAATACCGCATAACGTCGCAAGACCAAAGAGGGGGACCTTCGGGCCTCTTGCCATCAGATGTGCCCAGATGGGATTAGCTAGTAGGTGGGGTAACGGCTCACCTAGGCGACGATCCCTAGCTGGTCTGAGAGGATGACCAGCCACACTGGAACTGAGACACGGTCCAGACTCCTACGGGAGGCAGCAGTGGGGAATATTGCACAATGGGCGCAAGCCTGATGCAGCCATGCCGCGTGTATGAAGAAGGCCTTCGGGTTGTAAAGTACTTTCAGCGGGGAGGAAGGCGATAA…	1041	Pseudomonadota	Gammaproteobacteria	Enterobacterales	Enterobacteriaceae	Klebsiella	Klebsiella grimontii	1799	96.93	Klebsiella grimontii	Klebsiella	138	OTU17	0	OTU17	99.21	2 N mismatches
L1-13ET-F	OM164520	U31	Experimental/Fg-treated Silks	L	CO444	T	27F	0	0	TCGAACGGTAGCACAGAGAGCTTGCTCTCGGGTGACGAGTGGCGGACGGGTGAGTAATGTCTGGGAAACTGCCCGATGGAGGGGGATAACTACTGGAAACGGTAGCTAATACCGCATAACGTCGCAAGACCAAAGAGGGGGACCTTCGGGCCTCTTGCCATCGGATGTGCCCAGATGGGATTAGCTTGTAGGTGAGGTAACGGCTCACCTAGGCGACGATCCCTAGCTGGTCTGAGAGGATGACCAGCCACACTGGAACTGAGACACGGTCCAGACTCCTACGGGAGGCAGCAGTGGGGAATATTGCACAATGGGCGCAAGCCTGATGCAGCCATGCCGCGTGTATGAAGAAGGCCTTCGGGTTGTAAAGTACTTTCAGCGGGGAGGAAGGGAGTGAGG…	1396	Pseudomonadota	Gammaproteobacteria	Enterobacterales	Enterobacteriaceae	Klebsiella	Klebsiella oxytoca	2518	100	Klebsiella oxytoca	Klebsiella	131	OTU17	OTU17	0	100	None
L1-13EB-I	MT777235	V28	Experimental/Fg-treated Silks	L	CO444	B	27F	5	0.00366569	CACANAAGAGCTTGCTCTCGGGTGACGAGTGGCGGACGGGTGAGTAATGTCTGGGAAACTGCCTGATGGAGGGGGATAACTACTGGAAACGGTAGCTAATACCGCATAACGTCGCAAGACCAAAGAGGGGGACCTTCGGGCCTCTTGCCATCAGATGTGCCCAGATGGGATTAGCTAGTAGGTGGGGTAACGGCTCACCTAGGCGACGATCCCTAGCTGGTCTGAGAGGATGACCAGCCACACTGGAACTGAGACACGGTCCAGACTCCTACGGGAGGCAGCAGTGGGGAATATTGCACAATGGGCGCAAGCCTGATGCAGCCATGCCGCGTGTATGAAGAAGGCCTTCGGGTTGTAAAGTACTTTCAGCGGGGAGGAANGNNATAAGGTTAATAACCT…	1364	Pseudomonadota	Gammaproteobacteria	Enterobacterales	Enterobacteriaceae	Klebsiella	Klebsiella grimontii	2423	99.48	Klebsiella grimontii	Klebsiella	130&138	OTU17	OTU17	0	100	None
L1-13ET-P	OM164547	V29	Experimental/Fg-treated Silks	L	CO444	T	27F	3	0.00214133	GTCGAACGGTAGCACAGNAGAGCTTGCTCTCGGGTGACGAGTGGCGGACGGGTGAGTAATGTCTGGGAAACTGCCCGATGGAGGGGGATAACTACTGGAAACGGTAGCTAATACCGCATAACGTCGCAAGACCAAAGAGGGGGACCTTCGGGCCTCTTGCCATCGGATGTGCCCAGATGGGATTAGCTTGTAGGTGAGGTAACGGCTCACCTAGGCGACGATCCCTAGCTGGTCTGAGAGGATGACCAGCCACACTGGAACTGAGACACGGTCCAGACTCCTACGGGAGGCAGCAGTGGGGAATATTGCACAATGGGCGCAAGCCTGATGCAGCCATGCCGCGTGTATGAAGAAGGCCTTCGGGTTGTAAAGTACTTTCAGCGGGGAGGAAGGGAGTGA…	1401	Pseudomonadota	Gammaproteobacteria	Enterobacterales	Enterobacteriaceae	Klebsiella	Klebsiella oxytoca	2507	99.79	Klebsiella oxytoca	Klebsiella	131	OTU17	OTU17	0	100	None
P1-1CT-O	OM241067	N10	Control/Healthy Silks	P	CO449	T	27F	7	0.00752688	CTTCATTTGCAACCCACTCCCATGGTGTGACGGGCGGTGTGTACAAGGCCCGGGAACGTATTCACCGTGACATTCTGATTCACGATTACTAGCGATTCCGACTTCATGGAGTCGAGTTGCAGACTCCAATCCGGACTACGACGCACTTTATGAGGTCCGCTGGCTCTCGCGAGATTGCTTCTCTTTGTATGCGCCATTGTAGCACGTGTGTAGCCCTGGTCGTAAGGGCCATGATGACTTGACGTCATCCCCACCTTCCTCCAGTTTATCACTGGCAGTCTCCTTTGAGTTCCCGGCCTAACCGCTGGCAACAAAGGATAAGGGTTGCGCTCGTTGCGGGACTTAACCCAACATTTCACAACACGAGCTGACGACAGCCATGCAGCACCTGTCTCACAG…	930	Pseudomonadota	Gammaproteobacteria	Enterobacterales	Enterobacteriaceae	0	0	1620	97.85	Atlantibacter hermannii	Atlantibacter	25	OTU2	0	OTU2	96.85	7 N mismatches, 1 space next to 3 N's
L1-11CB-B1	OM164313	N67	Control/Healthy Silks	L	CO452	B	27F	4	0.00282885	TGCAGTCGAACGGTAACAGGAAGCAGCTTGCTGCTTNGCTGACGAGTGGCGGACGGGTGAGTAATGTCTGGGAAACTGCCTGATGGAGGGGGATAACTACTGGAAACGGTAGCTAATACCGCATAACGTCGCAAGACCAAAGAGGGGGACCTTCGGGCCTCTTGCCATCAGATGTGCCCAGATGGGATTAGCTAGTAGGTGGGGTAACGGCTCACCTAGGCGACGATCCCTAGCTGGTCTGAGAGGATGACCAGCCACACTGGAACTGAGACACGGTCCAGACTCCTACGGGAGGCAGCAGTGGGGAATATTGCACAATGGGCGCAAGCCTGATGCAGCCATGCCGCGTGTATGAAGAAGGCCTTCGGGTTGTAAAGTACTTTCAGCGGGGAGGAAGGC…	1414	Pseudomonadota	Gammaproteobacteria	Enterobacterales	Enterobacteriaceae	Atlantibacter	Atlantibacter hermannii	2450	98.58	Atlantibacter hermannii	Atlantibacter	26	OTU2	OTU2	0	100	None
L1-4CB-J	OM241043	O60	Control/Healthy Silks	L	CO432	B	27F	10	0.0107296	ACTTCTTTTGCAACCCACTCCCATGGTGTGACGGGCGGTGTGTACAAGGCCCGGGAACGTATTCACCGTGACATTCTGATTCACGATTACTAGCGATTCCGACTTCATGGAGTCGAGTTGCAGACTCCAATCCGGACTACGACGCACTTTATGAGGTCCGCTTGCTCTCGCGAGTTTGCTTCTCTTTGTATGCGCCATTGTAGCACGTGTGTAGCCCTGGTCGTAAGGGCCATGATGACTTGACGTCATCCCCACCTTCCTCCAGTTTATCACTGGCAGTCTCCTTTGAGTTCCCGGCCTAACCGCTGGCAACAAAGGATAAGGGTTGCGCTCGTTGCGGGACTTAACCCAACATTTCACAACACGAGCTGACGACAGCCATGCAGCACCTGTCTCACA…	932	Pseudomonadota	Gammaproteobacteria	Enterobacterales	Enterobacteriaceae	0	0	1614	98.18	Atlantibacter hermannii	Atlantibacter	31	OTU2	0	OTU2	96.83	8 N mismatches
L1-11CB-H	OM164355	O64	Control/Healthy Silks	L	CO452	B	27F	4	0.00289436	CATGCAGTCGNACGGTAACAGGAAGCAGCTTGCTGCTTTGCTGACGAGTGGCGGACGGGTGAGTAATGTCTGGGAAACTGCCTGATGGAGGGGGATAACTACTGGAAACGGTAGCTAATACCGCATAACGTCGCAAGACCAAAGAGGGGGACCTTCGGGCCTCTTGCCATCAGATGTGCCCAGATGGGATTAGCTAGTAGGTGGGGTAACGGCTCACCTAGGCGACGATCCCTAGCTGGTCTGAGAGGATGACCAGCCACACTGGAACTGAGACACGGTCCAGACTCCTACGGGAGGCAGCAGTGGGGAATATTGCACAATGGGCGCAAGCCTGATGCAGCCATGCCGCGTGTATGAAGAAGGCCTTCGGGTTGTAAAGTACTTTCAGCGGGGAGGAAG…	1382	Pseudomonadota	Gammaproteobacteria	Enterobacterales	Enterobacteriaceae	0	0	2397	98.48	Atlantibacter hermannii	Atlantibacter	24	OTU2	OTU2	0	100	None
P1-19CT-D	MT308744	Q26	Control/Healthy Silks	P	P9855HR	T	27F	0	0	ACGGTAACAGGAAGCAGCTTGCTGCTTCGCTGACGAGTGGCGGACGGGTGAGTAATGTCTGGGAAACTGCCTGATGGAGGGGGATAACTACTGGAAACGGTAGCTAATACCGCATAACGTCGCAAGACCAAAGAGGGGGACCTTCGGGCCTCTTGCCATCAGATGTGCCCAGATGGGATTAGCTAGTAGGTGGGGTAACGGCTCACCTAGGCGACGATCCCTAGCTGGTCTGAGAGGATGACCAGCCACACTGGAACTGAGACACGGTCCAGACTCCTACGGGAGGCAGCAGTGGGGAATATTGCACAATGGGCGCAAGCCTGATGCAGCCATGCCGCGTGTATGAAGAAGGCCTTCGGGTTGTAAAGTACTTTCAGCGGGGAGGAAGGCGATGCGGTT…	1370	Pseudomonadota	Gammaproteobacteria	Enterobacterales	Enterobacteriaceae	Atlantibacter	Atlantibacter hermannii	2453	98.98	Atlantibacter hermannii	Atlantibacter	16	OTU2	OTU2	0	100	None
L1-19CT-P	OM164419	Q64	Control/Healthy Silks	L	P9855HR	T	27F	1	0.000723066	CATGCAGTCGAACGGTAACAGGAAGCAGCTTGCTGCTTCGCTGACGAGTGGCGGACGGGTGAGTAATGTCTGGGAAACTGCCTGATGGAGGGGGATAACTACTGGAAACGGTAGCTAATACCGCATAACGTCGCAAGACCAAAGAGGGGGACCTTCGGGCCTCTTGCCATCAGATGTGCCCAGATGGGATTAGCTAGTAGGTGGGGTAACGGCTCACCTAGGCGACGATCCCTAGCTGGTCTGAGAGGATGACCAGCCACACTGGAACTGAGACACGGTCCAGACTCCTACGGGAGGCAGCAGTGGGGAATATTGCACAATGGGCGCAAGCCTGATGCAGCCATGCCGCGTGTATGAAGAAGGCCTTCGGGTTGTAAAGTACTTTCAGCGGGGAGGAAG…	1383	Pseudomonadota	Gammaproteobacteria	Enterobacterales	Enterobacteriaceae	0	0	2483	99.06	Atlantibacter hermannii	Atlantibacter	21	OTU2	OTU2	0	100	None
L1-2CB-C	OM164442	R66	Control/Healthy Silks	L	CO441	B	27F	6	0.00433213	ATGCAGTCGNACGGTAACAGGAAGCAGCTTGCTGCTTCGCTGACGAGTGGCGGACGGGTGAGTAATGTCTGGGAAACTGCCTGATGGAGGGGGATAACTACTGGAAACGGTAGCTAATACCGCATAACGTCGCAAGACCAAAGAGGGGGACCTTCGGGCCTCTTGCCATCAGATGTGCCCAGATGGGATTAGCTAGTAGGTGGGGTAACGGCTCACCTAGGCGACGATCCCTAGCTGGTCTGAGAGGATGACCAGCCACACTGGAACTGAGACACGGTCCAGACTCCTACGGGAGGCAGCAGTGGGGAATATTGCACAATGGGCGCAAGCCTGATGCAGCCATGCCGCGTGTATGAAGAAGGCCTTCGGGTTGTAAAGTACTTTCAGCGGGGAGGAAGG…	1385	Pseudomonadota	Gammaproteobacteria	Enterobacterales	Enterobacteriaceae	0	0	2460	98.7	Atlantibacter hermannii	Atlantibacter	19	OTU2	0	OTU2	99.22	2 N mismatches
P1-1CT-B	MT355343	S52	Control/Healthy Silks	P	CO449	T	27F	4	0.002886	CATGCAGTCGNACGGTAACAGGAAGCAGCTTGCTGCTTTGCTGACGAGTGGCGGACGGGTGAGTAATGTCTGGGAAACTGCCTGATGGAGGGGGATAACTACTGGAAACGGTAGCTAATACCGCATAACGTCGCAAGACCAAAGAGGGGGACCTTCGGGCCTCTTGCCATCAGATGTGCCCAGATGGGATTAGCTAGTAGGTGGGGTAACGGCTCACCTAGGCGACGATCCCTAGCTGGTCTGAGAGGATGACCAGCCACACTGGAACTGAGACACGGTCCAGACTCCTACGGGAGGCAGCAGTGGGGAATATTGCACAATGGGCGCAAGCCTGATGCAGCCATGCCGCGTGTATGAAGAAGGCCTTCGGGTTGTAAAGTACTTTCAGCGGGGAGGAAG…	1386	Pseudomonadota	Gammaproteobacteria	Enterobacterales	Enterobacteriaceae	0	0	2431	98.34	Atlantibacter hermannii	Atlantibacter	25	OTU2	0	OTU2	99.61	1 N mismatch
P1-12ET-J	MT308730	L09	Experimental/Fg-treated Silks	P	CO448	T	27F	7	0.00503597	CAGGAAGCAGCTTGCTGCTTNGCTGACGAGTGGCGGACGGGTGAGTAATGTCTGGGAAACTGCCTGATGGAGGGGGATAACTACTGGAAACGGTAGCTAATACCGCATAACGTCGCAAGACCAAAGAGGGGGACCTTCGGGCCTCTTGCCATCAGATGTGCCCAGATGGGATTAGCTAGTAGGTGGGGTAACGGCTCACCTAGGCGACGATCCCTAGCTGGTCTGAGAGGATGACCAGCCACACTGGAACTGAGACACGGTCCAGACTCCTACGGGAGGCAGCAGTGGGGAATATTGCACAATGGGCGCAAGCCTGATGCAGCCATGCCGCGTGTATGAAGAAGGCCTTCGGGTTGTAAAGTACTTTCAGCGGGGAGGAAGGCGATGCGGTTAATAACC…	1390	Pseudomonadota	Gammaproteobacteria	Enterobacterales	Enterobacteriaceae	Atlantibacter	Atlantibacter hermannii	2419	98.56	Atlantibacter hermannii	Atlantibacter	17&404	OTU2	OTU2	0	100	none
L1-6EB-C	OM164309	N62	Experimental/Fg-treated Silks	L	CO430	B	27F	9	0.00639205	GTCGAACGGTAACAGGAAGCAGCTTGCTGCTTNGCTGACGAGTGGCGGACGGGTGAGTAATGTCTGGGAAACTGCCTGATGGAGGGGGATAACTACTGGAAACGGTAGCTAATACCGCATAACGTCGCAAGACCAAAGAGGGGGACCTTCGGGCCTCTTGCCATCAGATGTGCCCAGATGGGATTAGCTAGTAGGTGGGGTAACGGCTCACCTAGGCGACGATCCCTAGCTGGTCTGAGAGGATGACCAGCCACACTGGAACTGAGACACGGTCCAGACTCCTACGGGAGGCAGCAGTGGGGAATATTGCACAATGGGCGCAAGCCTGATGCAGCCATGCCGCGTGTATGAAGAAGGCCTTCGGGTTGTAAAGTACTTTCAGCGGGGAGGAAGGCGATG…	1408	Pseudomonadota	Gammaproteobacteria	Enterobacterales	Enterobacteriaceae	0	0	2449	98.44	Atlantibacter hermannii	Atlantibacter	26	OTU2	OTU2	0	100	None
P1-19EB-A	MT777207	P45	Experimental/Fg-treated Silks	P	P9855HR	B	27F	4	0.00284495	TGCAGTCGAACGGTAACAGGAAGCAGCTTGCTGCTTNGCTGACGAGTGGCGGACGGGTGAGTAATGTCTGGGAAACTGCCTGATGGAGGGGGATAACTACTGGAAACGGTAGCTAATACCGCATAACGTCGCAAGACCAAAGAGGGGGACCTTCGGGCCTCTTGCCATCAGATGTGCCCAGATGGGATTAGCTAGTAGGTGGGGTAACGGCTCACCTAGGCGACGATCCCTAGCTGGTCTGAGAGGATGACCAGCCACACTGGAACTGAGACACGGTCCAGACTCCTACGGGAGGCAGCAGTGGGGAATATTGCACAATGGGCGCAAGCCTGATGCAGCCATGCCGCGTGTATGAAGAAGGCCTTCGGGTTGTAAAGTACTTTCAGCGGGGAGGAAGGC…	1406	Pseudomonadota	Gammaproteobacteria	Enterobacterales	Enterobacteriaceae	Atlantibacter	Atlantibacter hermannii	2495	98.65	Atlantibacter hermannii	Atlantibacter	29	OTU2	OTU2	0	100	None
L1-4ET-C	MT777208	Q02	Experimental/Fg-treated Silks	L	CO432	T	27F	8	0.00578871	ATGCAGTCGAACGGTAACAGGAAGCAGCTTGCTGCTTNGCTGACGAGTGGCGGACGGGTGAGTAATGTCTGGGAAACTGCCTGATGGAGGGGGATAACTACTGGAAACGGTAGCTAATACCGCATAACGTCGCAAGACCAAAGAGGGGGACCTTCGGGCCTCTTGCCATCAGATGTGCCCAGATGGGATTAGCTAGTAGGTGGGGTAACGGCTCACCTAGGCGACGATCCCTAGCTGGTCTGAGAGGATGACCAGCCACACTGGAACTGAGACACGGTCCAGACTCCTACGGGAGGCAGCAGTGGGGAATATTGCACAATGGGCGCAAGCCTGATGCAGCCATGCCGCGTGTATGAAGAAGGCCTTCGGGTTGTAAAGTACTTTCAGCGGGGAGGAAGG…	1382	Pseudomonadota	Gammaproteobacteria	Enterobacterales	Enterobacteriaceae	0	0	2447	98.48	Atlantibacter hermannii	Atlantibacter	18&403	OTU2	OTU2	0	100	None
P1-5ET-E	MT305792	Q46	Experimental/Fg-treated Silks	P	CO431	T	27F	31	0.0297791	AAGCAGCTTGCTGCTTCGCTGACGAGTGGCGGACGGGTGAGTAATGTCTGGGAAACTGCCTGATGGAGGGGGATAACTACTGGAAACGGTAGCTAATACCGCATAACGTCGCAAGACCAAAGAGGGGGACCTTCGGGCCTCTTGCCATCAGATGTGCCCAGATGGGATTAGCTAGTAGGTGGGGTAACGGCTCACCTAGGCGACGATCCCTAGCTGGTCTGAGAGGATGACCAGCCACACTGGAACTGAGACACGGTCCAGACTCCTACGGGAGGCAGCAGTGGGGAATATTGCACAATGGGCGCAAGCCTGATGCAGCCATGCCGCGTGTATGAAGAAGGCCTTCGGGTTGTAAAGTACTTTCAGCGGGGAGGAAGGCGATGCGGTTAATAACCGCGT…	1041	Pseudomonadota	Gammaproteobacteria	Enterobacterales	Enterobacteriaceae	0	0	1738	95.7	Kosakonia cowanii	Kosakonia	22&24&16&17&29&27&30	OTU2	0	OTU2	99.21	2 N mismatches
P1-5ET-J	OM240982	R20	Experimental/Fg-treated Silks	P	CO431	T	27F	13	0.0136268	TGCAGTCGAACGGTAACAGGAAGCAGCTTGCTGCTTCGCTGACGAGTGGCGGACGGGTGAGTAATGTCTGGGAAACTGCCTGATGGAGGGGGATAACTACTGGAAACGGTAGCTAATACCGCATAACGTCGCAAGACCAAAGAGGGGGACCTTCGGGCCTCTTGCCATCAGATGTGCCCAGATGGGATTAGCTAGTAGGTGGGGTAACGGCTCACCTAGGCGACGATCCCTAGCTGGTCTGAGAGGATGACCAGCCACACTGGAACTGAGACACGGTCCAGACTCCTACGGGAGGCAGCAGTGGGGAATATTGCACAATGGGCGCAAGCCTGATGCAGCCATGCCGCGTGTATGAAGAAGGCCTTCGGGTTGTAAAGTACTTTCAGCGGGGAGGAAGGC…	954	Pseudomonadota	Gammaproteobacteria	Enterobacterales	Enterobacteriaceae	0	0	1649	98.42	Kosakonia cowanii	Kosakonia	22&16&17&29&27	OTU2	0	OTU2	98.43	4 N mismatches
P1-19ET-A	MT305793	S02	Experimental/Fg-treated Silks	P	P9855HR	T	27F	23	0.0246517	AAGCAGCTTGCTGCTTNGCTGACGAGTGGCGGACGGGTGAGTAATGTCTGGGAAACTGCCTGATGGAGGGGGATAACTACTGGAAACGGTAGCTAATACCGCATAACGTCGCAAGACCAAAGAGGGGGACCTTCGGGCCTCTTGCCATCAGATGTGCCCAGATGGGATTAGCTAGTAGGTGGGGTAACGGCTCACCTAGGCGACGATCCCTAGCTGGTCTGAGAGGATGACCAGCCACACTGGAACTGAGACACGGTCCAGACTCCTACGGGAGGCAGCAGTGGGGAATATTGCACAATGGGCGCAAGCCTGATGCAGCCATGCCGCGTGTATGAAGAAGGCCTTCGGGTTGTAAAGTACTTTCAGCGGGGAGGAAGGCGATGNGGTTAATAACCGCGT…	933	Pseudomonadota	Gammaproteobacteria	Enterobacterales	Enterobacteriaceae	0	0	1574	97.22	Kosakonia cowanii	Kosakonia	21&22&23&24&26&16&17&29&30&27&33	OTU2	0	OTU2	99.21	2 N mismatches
P1-17ET-A	OM164461	S32	Experimental/Fg-treated Silks	P	P35837	T	27F	6	0.00424028	TGCAGTCGAACGGTAACAGGAAGCAGCTTGCTGCTTCGCTGACGAGTGGCGGACGGGTGAGTAATGTCTGGGAAACTGCCTGATGGAGGGGGATAACTACTGGAAACGGTAGCTAATACCGCATAACGTCGCAAGACCAAAGAGGGGGACCTTCGGGCCTCTTGCCATCAGATGTGCCCAGATGGGATTAGCTAGTAGGTGGGGTAACGGCTCACCTAGGCGACGATCCCTAGCTGGTCTGAGAGGATGACCAGCCACACTGGAACTGAGACACGGTCCAGACTCCTACGGGAGGCAGCAGTGGGGAATATTGCACAATGGGCGCAAGCCTGATGCAGCCATGCCGCGTGTATGAAGAAGGCCTTCGGGTTGTAAAGTACTTTCAGCGGGGAGGAAGGC…	1415	Pseudomonadota	Gammaproteobacteria	Enterobacterales	Enterobacteriaceae	0	0	2516	98.73	Atlantibacter hermannii	Atlantibacter	17	OTU2	OTU2	0	100	None
P1-19ET-G	MT777225	S34	Experimental/Fg-treated Silks	P	P9855HR	T	27F	11	0.0078125	TGCAAGTCGNACGGTAACAGGAAGCAGCTTGCTGCTTNGCTGACGAGTGGCGGACGGGTGAGTAATGTCTGGGAAACTGCCTGATGGAGGGGGATAACTACTGGAAACGGTAGCTAATACCGCATAACGTCGCAAGACCAAAGAGGGGGACCTTCGGGCCTCTTGCCATCAGATGTGCCCAGATGGGATTAGCTAGTAGGTGGGGTAACGGCTCACCTAGGCGACGATCCCTAGCTGGTCTGAGAGGATGACCAGCCACACTGGAACTGAGACACGGTCCAGACTCCTACGGGAGGCAGCAGTGGGGAATATTGCACAATGGGCGCAAGCCTGATGCAGCCATGCCGCGTGTATGAAGAAGGCCTTCGGGTTNGTAAAGTACTTTCAGCGGGGAGGAAG…	1408	Pseudomonadota	Gammaproteobacteria	Enterobacterales	Enterobacteriaceae	0	0	2451	98.55	Atlantibacter hermannii	Atlantibacter	27	OTU2	OTU2	0	100	None
L1-17ET-E	OM164469	S53	Experimental/Fg-treated Silks	L	P35837	T	27F	0	0	TGCAGTCGAACGGTAACAGGAAGCAGCTTGCTGCTTCGCTGACGAGTGGCGGACGGGTGAGTAATGTCTGGGAAACTGCCTGATGGAGGGGGATAACTACTGGAAACGGTAGCTAATACCGCATAACGTCGCAAGACCAAAGAGGGGGACCTTCGGGCCTCTTGCCATCAGATGTGCCCAGATGGGATTAGCTAGTAGGTGGGGTAACGGCTCACCTAGGCGACGATCCCTAGCTGGTCTGAGAGGATGACCAGCCACACTGGAACTGAGACACGGTCCAGACTCCTACGGGAGGCAGCAGTGGGGAATATTGCACAATGGGCGCAAGCCTGATGCAGCCATGCCGCGTGTATGAAGAAGGCCTTCGGGTTGTAAAGTACTTTCAGCGGGGAGGAAGGC…	1410	Pseudomonadota	Gammaproteobacteria	Enterobacterales	Enterobacteriaceae	Atlantibacter	Atlantibacter hermannii	2483	99.22	Atlantibacter hermannii	Atlantibacter	17	OTU2	OTU2	0	100	None
P1-17ET-I	OM164470	S54	Experimental/Fg-treated Silks	P	P35837	T	27F	2	0.00147493	AGCTTGCTGCTTCGCTGACGAGTGGCGGACGGGTGAGTAATGTCTGGGAAACTGCCTGATGGAGGGGGATAACTACTGGAAACGGTAGCTAATACCGCATAACGTCGCAAGACCAAAGAGGGGGACCTTCGGGCCTCTTGCCATCAGATGTGCCCAGATGGGATTAGCTAGTAGGTGGGGTAACGGCTCACCTAGGCGACGATCCCTAGCTGGTCTGAGAGGATGACCAGCCACACTGGAACTGAGACACGGTCCAGACTCCTACGGGAGGCAGCAGTGGGGAATATTGCACAATGGGCGCAAGCCTGATGCAGCCATGCCGCGTGTATGAAGAAGGCCTTCGGGTTGTAAAGTACTTTCAGCGGGGAGGAAGGCGATGCGGTTAATAACCGCGTCGAT…	1356	Pseudomonadota	Gammaproteobacteria	Enterobacterales	Enterobacteriaceae	0	0	2438	99.12	Atlantibacter hermannii	Atlantibacter	17	OTU2	OTU2	0	100	None
P1-19ET-P	OM164488	T21	Experimental/Fg-treated Silks	P	P9855HR	T	27F	4	0.00284091	CATGCAGTCGAACGGTAACAGGAAGCAGCTTGCTGCTTNGCTGACGAGTGGCGGACGGGTGAGTAATGTCTGGGAAACTGCCTGATGGAGGGGGATAACTACTGGAAACGGTAGCTAATACCGCATAACGTCGCAAGACCAAAGAGGGGGACCTTCGGGCCTCTTGCCATCAGATGTGCCCAGATGGGATTAGCTAGTAGGTGGGGTAACGGCTCACCTAGGCGACGATCCCTAGCTGGTCTGAGAGGATGACCAGCCACACTGGAACTGAGACACGGTCCAGACTCCTACGGGAGGCAGCAGTGGGGAATATTGCACAATGGGCGCAAGCCTGATGCAGCCATGCCGCGTGTATGAAGAAGGCCTTCGGGTTGTAAAGTACTTTCAGCGGGGAGGAAG…	1408	Pseudomonadota	Gammaproteobacteria	Enterobacterales	Enterobacteriaceae	Atlantibacter	Atlantibacter hermannii	2508	98.72	Atlantibacter hermannii	Atlantibacter	22	OTU2	OTU2	0	100	None
P1-16ET-D	OM262837	T53	Experimental/Fg-treated Silks	P	CO462	T	27F	0	0	GCAGCTTGCTGCTTCGCTGACGAGTGGCGGACGGGTGAGTAATGTCTGGGAAACTGCCTGATGGAGGGGGATAACTACTGGAAACGGTAGCTAATACCGCATAACGTCGCAAGACCAAAGAGGGGGACCTTCGGGCCTCTTGCCATCAGATGTGCCCAGATGGGATTAGCTAGTAGGTGGGGTAACGGCTCACCTAGGCGACGATCCCTAGCTGGTCTGAGAGGATGACCAGCCACACTGGAACTGAGACACGGTCCAGACTCCTACGGGAGGCAGCAGTGGGGAATATTGCACAATGGGCGCAAGCCTGATGCAGCCATGCCGCGTGTATGAAGAAGGCCTTCGGGTTGTAAAGTACTTTCAGCGGGGAGGAAGGCGATGTGGTTAATAACCGCGTCG…	1359	Pseudomonadota	Gammaproteobacteria	Enterobacterales	Enterobacteriaceae	Atlantibacter	Atlantibacter hermannii	2380	98.9	Atlantibacter hermannii/Kosakonia cowanii*	Atlantibacter/ Kosakonia	33	OTU2	OTU2	0	100	None
L1-13EB-A	OM164507	T75	Experimental/Fg-treated Silks	L	CO444	B	27F	20	0.0144092	TGCAGTCGNACGGTAACAGGAAGCAGCTTGCTGCTTTGCTGACGAGTGGCGGACGGGTGAGTAATGTCTGGGAAACTGCCTGATGGAGGGGGATAACTACTGGAAACGGTAGCTAATACCGCATAACGTCGCAAGACCAAAGAGGGGGACCTTCGGGCCTCTTGCCATCAGATGTGCCCAGATGGGATTAGCTAGTAGGTGGGGTAACGGCTCACCTAGGCGACGATCCCTAGCTGGTCTGAGAGGATGACCAGCCACACTGGAACTGAGACACGGTCCAGACTCCTACGGGAGGCAGCAGTGGGGAATATTGCACAATGGGCGCAAGCCTGATGCAGCCATGCCGCGTGTATGAAGAAGGCCTTCGGGTTGTAAAGTACTTTCAGCGGGGAGGAAGGC…	1388	Pseudomonadota	Gammaproteobacteria	Enterobacterales	Enterobacteriaceae	0	0	2339	97.55	Atlantibacter hermannii	Atlantibacter	30	OTU2	0	OTU2	99.21	2 N mismatches
L1-16ET-G	MT355344	U51	Experimental/Fg-treated Silks	L	CO462	T	27F	3	0.0021692	CATGCAGTCGNACGGTAACAGGAAGCAGCTTGCTGCTTCGCTGACGAGTGGCGGACGGGTGAGTAATGTCTGGGAAACTGCCTGATGGAGGGGGATAACTACTGGAAACGGTAGCTAATACCGCATAACGTCGCAAGACCAAAGAGGGGGACCTTCGGGCCTCTTGCCATCAGATGTGCCCAGATGGGATTAGCTAGTAGGTGGGGTAACGGCTCACCTAGGCGACGATCCCTAGCTGGTCTGAGAGGATGACCAGCCACACTGGAACTGAGACACGGTCCAGACTCCTACGGGAGGCAGCAGTGGGGAATATTGCACAATGGGCGCAAGCCTGATGCAGCCATGCCGCGTGTATGAAGAAGGCCTTCGGGTTGTAAAGTACTTTCAGCGGGGAGGAAG…	1383	Pseudomonadota	Gammaproteobacteria	Enterobacterales	Enterobacteriaceae	Atlantibacter	Atlantibacter hermannii	2406	98.7	Atlantibacter hermannii	Atlantibacter	23	OTU2	OTU2	0	100	None
L1-5CB-X	OM164165	D14	Control/Healthy Silks	L	CO431	B	27F	17	0.0120653	TGCAGTCGGACGGTAGCACAGAGGAGCTTGCTCCTCGGGTGACGAGTGGNGGACGGGTGAGTAGTGTNNGGGGATCTGCCCGATAGAGGGGGATAACCACTGGAAACGGTGGCTAATACCGCATAACGTCGCAAGACCAAAGAGGGGGACCTTCGGGCCTCTCACTATCGGATGAACCCANATGGGATTAGCTAGTANGCGGGGTAACGGCCCACCTAGGCGACNATCCCTAGCTGGTCTGAGAGGATGACCAGCCACNCTGGAACTGANACACGGTCCACACTCCTACGGGAGGCAGCAGTGGGGAATATTGCACAGTGGGCGCAAGCCTGATGCACCCATGCCGCGTGTATGAANAANGCCTTCGGGTTGTAAAGTACTTTCAGCGGGGAGGAAGGC…	1409	Pseudomonadota	Gammaproteobacteria	Enterobacterales	Erwiniaceae	0	0	2397	97.65	Pantoea agglomerans/ Pantoea ananatis	Pantoea	258	OTU25	0	OTU25	99.22	2 N mismatches
P1-4CT-C	MT305789	L19	Control/Healthy Silks	P	CO432	T	27F	8	0.00809717	TCGATTGACGTTACCCGCAGAAGAAGCACCGGNCTAANTCCGTGCCAGCAGCCGCGGTAATACGGAGGGTGCAAGCGTTAATNGGAATTACTGGGCGTAAAGCGCACGCNGGCGGTCTGTTAAGTCAGATGTGAAATCCCCGGGCTTAACCTGGGAACTGCATTTGAAACTGGCAGGCTTGAGTCTCGTAGAGGGGGGTAGAATTCCAGGTGTAGCGGTGAAATGCGTAGAGATCTGGAGGAATACCGGTGGCGAAGGCGGCCCCCTGGACGAAGACTGACGCTCAGGTGCGAAAGCGTGGGGAGCAAACAGGATTAGATACCCTGGTAGTCCACGCCGTAAACGATGTCGACTTGGAGGTTGTTCCCTTGAGGAGTGGCTTCCGGAGCTAACGCGTTA…	988	Pseudomonadota	Gammaproteobacteria	Enterobacterales	Erwiniaceae	0	0	1740	98.99	Pantoea ananatis	Pantoea	270&271&276&290&292	OTU25	0	OTU25	99.21	2 N mismatches
P1-1CB-F	MT355329	L72	Control/Healthy Silks	P	CO449	B	27F	10	0.0101523	GTGGTAGCGCCCTCCCGAAGGTTAAGCTACCTACTTCTTTTGCAACCCACTCCCATGGTGTGACGGGCGGTGTGTACAAGGCCCGGGAACGTATTCACCGTGGCATTCTGATCCACGATTACTAGCGATTCCGACTTCACGGAGTCGAGTTGCAGACTCCGATCCGGACTACGACGCACTTTATGAGGTCCGCTTGCTCTCGCGAGGTCGCTTCTCTTTGTATGCGCCATTGTAGCACGTGTGTAGCCCTACTCGTAAGGGCCATGATGACTTGACGTCATCCCCACCTTCCTCCGGTTTATCACCGGCAGTCTCCTTTGAGTTCCCGACCGAATCGCTGGCAACAAAGGATAAGGGTTGCGCTCGTTGCGGGACTTAACCCAACATTTCACAACACGA…	985	Pseudomonadota	Gammaproteobacteria	Enterobacterales	Erwiniaceae	0	0	1766	98.68	Pantoea ananatis	Pantoea	265&270&271&276	OTU25	0	OTU25	98.03	5 N mismatches
P1-12CT-I	OM241028	N42	Control/Healthy Silks	P	CO448	T	27F	13	0.0131579	GTAGCGCCCTCCCGAAGGTTAAGCTACCTACTTCTTTTGCAACCCACTCCCATGGTGTGACGGGCGGTGTGTACAAGGCCCGGGAACGTATTCACCGTGGCATTCTGATCCACGATTACTAGCGATTCCGACTTCACGGAGTCGAGTTGCAGACTCCGATCCGGACTACGACGCACTTTATGAGGTCCGCTTGCTCTCGCGAGGTCGCTTCTCTTTGTATGCGCCATTGTAGCACGTGTGTAGCCCTACTCGTAAGGGCCATGATGACTTGACGTCATCCCCACCTTCCTCCGGTTTATCACCGGCAGTCTCCTTTGAGTTCCCGACCGAATCGCTGGCAACAAAGGATAAGGGTTGCGCTCGTTGCGGGACTTAACCCAACATTTCACAACACGAGCT…	740&988	Pseudomonadota	Gammaproteobacteria	Enterobacterales	Erwiniaceae	Pantoea	0	1714	98.58	Pantoea ananatis	Pantoea	289&290&291&292	OTU25	0	OTU25	98.03	5 N mismatches
L1-4CB-G	OM164352	O59	Control/Healthy Silks	L	CO432	B	27F	2	0.00142653	TCGGACGGTAGCACAGAGGAGCTTGCTCCTCGGGTGACGAGTGGCGGACGGGTGAGTAATGTCTGGGGATCTGCCCGATAGAGGGGGATAACCACTGGAAACGGTGGCTAATACCGCATAACGTCGCAAGACCAAAGAGGGGGACCTTCGGGCCTCTCACTATCGGATGAACCCAGATGGGATTAGCTAGTAGGCGGGGTAACGGCCCACCTAGGCGACGATCCCTAGCTGGTCTGAGAGGATGACCAGCCACACTGGAACTGAGACACGGTCCAGACTCCTACGGGAGGCAGCAGTGGGGAATATTGCACAATGGGCGCAAGCCTGATGCAGCCATGCCGCGTGTATGAAGAAGGCCTTCGGGTTGTAAAGTACTTTCAGCGGGGAGGAAGGCGATGT…	1402	Pseudomonadota	Gammaproteobacteria	Enterobacterales	Erwiniaceae	0	0	2497	99.57	Pantoea ananatis	Pantoea	292	OTU25	OTU25	0	100	None
P1-12CT-A	OM241069	S10	Control/Healthy Silks	P	CO448	T	27F	23	0.0241343	CTTCTTTTGCAACCCACTCCCATGGTGTGACGGGCGGTGTGTACAAGGCCCGGGAACGTATTCACCGTGGCATTCTGATCCACGATTACTAGCGATTCCGACTTCACGGAGTCGAGTTGCAGACTCCGATCCGGACTACGACGCACTTTATGAGGTCCGCTTGCTCTCGCGAGGTCGCTTCTCTTTGTATGCGCCATTGTAGCACGTGTGTAGCCCTACTCGTAAGGGCCATGATGACTTGACGTCATCCCCACCTTCCTCCGGTTTATCACCGGCAGTCTCCTTTGAGTTCCCGACCGAATCGCTGGCAACAAAGGATAAGGGTTGCGCTCGTTGCGGGACTTAACCCAACATTTCACAACACGAGCTGACGACAGCCATGCAGCACCTGTCTCAGAG…	953	Pseudomonadota	Gammaproteobacteria	Enterobacterales	Erwiniaceae	Pantoea	0	1539	99.29	Pantoea anthophila/ Pantoea ananatis	Pantoea	271&288&289&290&291&292	OTU25	0	OTU25	96.09	10 N mismatches
L1-12CT-C	OM164483	T14	Control/Healthy Silks	L	CO448	T	27F	4	0.00418848	TGGTAGCGCCCTCCCGAAGGTTAAGCTACCTACTTCTTTTGCAACCCACTCCCATGGTGTGACGGGCGGTGTGTACAAGGCCCGGGAACGTATTCACCGTGGCATTCTGATCCACGATTACTAGCGATTCCGACTTCACGGAGTCGAGTTGCAGACTCCGATCCGGACTACGACGCACTTTATGAGGTCCGCTTGCTCTCGCGAGGTCGCTTCTCTTTGTATGCGCCATTGTAGCACGTGTGTAGCCCTACTCGTAAGGGCCATGATGACTTGACGTCATCCCCACCTTCCTCCGGTTTATCACCGGCAGTCTCCTTTGAGTTCCCGACCGAATCGCTGGCAACAAAGGATAAGGGTTGCGCTCGTTGCGGGACTTAACCCAACATTTCACAACACGAG…	955	Pseudomonadota	Gammaproteobacteria	Enterobacterales	Erwiniaceae	Pantoea	Pantoea ananatis	1687	99.26	Pantoea ananatis	Pantoea	289&290&291&292	OTU25	0	OTU25	98.03	5 N mismatches
P1-11ET-I	OM241068	L03	Experimental/Fg-treated Silks	P	CO452	T	27F	33	0.0304709	CTTCTTTTGCAACCCACTCCCATGGTGTGACGGGCGGTGTGTACAAGGCCCGGGAACGTATTCACCGTGGCATTCTGATCCACGATTACTAGCGATTCCGACTTCACGGAGTCGAGTTGCAGACTCCGATCCGGACTACGACGCACTTTATGAGGTCCGCTTGCTCTCGCGAGGTCGCTTCTCTTTGTATGCGCCATTGTAGCACGTGTGTAGCCCTACTCGTAAGGGCCATGATGACTTGACGTCATCCCCACCTTCCTCCGGTTTATCACCGGCAGTCTCCTTTGAGTTCCCGACCGAATCGCTGGCAACAAAGGATAAGGGTTGCGCTCGTTGCGGGACTTAACCCAACATTTCACAACACGAGCTGACGACAGCCATGCAGCACCTGTCTCAGAG…	1083	Pseudomonadota	Gammaproteobacteria	Enterobacterales	Erwiniaceae	0	0	1780	96.05	Pantoea ananatis	Pantoea	268&289&290&291&292	OTU25	0	OTU25	96.85	7 N mismatches, 1 non-N mismatch (space)
P1-12ET-K	OM241070	L05	Experimental/Fg-treated Silks	P	CO448	T	27F	6	0.00645856	CTTCTTTTGCAACCCACTCCCATGGTGTGACGGGCGGTGTGTACAAGGCCCGGGAACGTATTCACCGTGGCATTCTGATCCACGATTACTAGCGATTCCGACTTCACGGAGTCGAGTTGCAGACTCCGATCCGGACTACGACGCACTTTATGAGGTCCGCTTGCTCTCGCGAGGTCGCTTCTCTTTGTATGCGCCATTGTAGCACGTGTGTAGCCCTACTCGTAAGGGCCATGATGACTTGACGTCATCCCCACCTTCCTCCGGTTTATCACCGGCAGTCTCCTTTGAGTTCCCGACCGAATCGCTGGCAACAAAGGATAAGGGTTGCGCTCGTTGCGGGACTTAACCCAACATTTCACAACACGAGCTGACGACAGCCATGCAGCACCTGTCTCAGAG…	929	Pseudomonadota	Gammaproteobacteria	Enterobacterales	Erwiniaceae	Pantoea	Pantoea ananatis	1644	99.14	Pantoea ananatis	Pantoea	289&290&291&292	OTU25	0	OTU25	97.24	7 N mismatches
P1-2ET-H	OM164258	L10	Experimental/Fg-treated Silks	P	CO441	T	27F	32	0.0236862	CTTGCTCCTCGGGTGACGAGTGGCAGANGGGTGANTAATGTCTGGGGATCTGCCCGATAGAGGGGGATAACCNCTGGAAACGGTGGCTAATACCGCATAACGTCNCAAGACCAAAGAGGGGGACCTTCGGGCCTCTCACTATCAGATGAACCCANATGGGATTANCTANTANGCGGGGTAACGGCCCCCCTANGCNACTATCCCTANCTGGTCTGANAAGATGACCACCCACACTGGAACTGANACACGGTCCANACTCCTACGGGANGCANCTGTGGGGAATATTGCACAATGGGCGCAAGCCTGATGCANCCATGCCGCGTGTATGAANAANGCCTTCGGGTTGTAAAGTACTTTCAGCGGGGAAGAAGGCGATGTGGTAATAACCGCNTCGATTGA…	1351	Pseudomonadota	Gammaproteobacteria	Enterobacterales	Erwiniaceae	0	0	2251	96.6	Pantoea ananatis	Pantoea	268&271&289	OTU25	0	OTU25	97.24	7 N mismatches
P1-19ET-U	OM164285	N05	Experimental/Fg-treated Silks	P	P9855HR	T	27F	12	0.00881057	AGGAGCTTGCTCCTCGGGTGACGAGTGGCGGACGGGTGAGTAATGTCTGGGGATCTGCCCGATAGAGGGGGATAACCACTGGAAACGGTGGCTAATACCGCATAACGTCGCAAGACCAAAGAGGGGGACCTTCGGGCCTCTCACTATCGGATGAACCCAGATGGGATTAGCTAGTAGGCGGGGTAACGGCCCACCTAGGCGACGATCCCTAGCTGGTCTGAGAGGATGACCNGCCACACTGGAACTGAGACACGGTCCAGACTCCTACGGGAGGCAGCAGTGGGGAATATTGCACAATGGGCGCAAGCCTGATGCAGCCATGCCGCGTGTATGAAGAAGGCCTTCGGGTTGTAAAGTACTTTCAGCGGGGAGGAAGGCGATGTGGTTAATAACCGCGTC…	1362	Pseudomonadota	Gammaproteobacteria	Enterobacterales	Erwiniaceae	0	0	2369	98.46	Pantoea agglomerans	Pantoea	257	OTU25	0	OTU25	99.21	2 N mismatches
L1-17ET-G	OM241071	N11	Experimental/Fg-treated Silks	L	P35837	T	27F	8	0.00835946	CTTCTTTTGCAACCCACTCCCATGGTGTGACGGGCGGTGTGTACAAGGCCCGGGAACGTATTCACCGTGGCATTCTGATCCACGATTACTAGCGATTCCGACTTCACGGAGTCGAGTTGCAGACTCCGATCCGGACTACGACGCACTTTATGAGGTCCGCTTGCTCTCGCGAGGTCGCTTCTCTTTGTATGCGCCATTGTAGCACGTGTGTAGCCCTACTCGTAAGGGCCATGATGACTTGACGTCATCCCCACCTTCCTCCGGTTTATCACCGGCAGTCTCCTTTGAGTTCCCGACCGAATCGCTGGCAACAAAGGATAAGGGTTGCGCTCGTTGCGGGACTTAACCCAACATTTCACAACACGAGCTGACGACAGCCATGCAGCACCTGTCTCANAG…	957	Pseudomonadota	Gammaproteobacteria	Enterobacterales	Erwiniaceae	0	0	1724	98.95	Pantoea ananatis	Pantoea	270&271&276&289&290&291&292	OTU25	0	OTU25	98.03	5 N mismatches
L1-5EB-C	OM164359	O70	Experimental/Fg-treated Silks	L	CO431	B	27F	7	0.00496102	TGCAGTCGGACGGTAGCACNNNNNAGCTTGCTCCTCGGGTGACGAGTGGCGGACGGGTGAGTAATGTCTGGGGATCTGCCCGATAGAGGGGGATAACCACTGGAAACGGTGGCTAATACCGCATAACGTCGCAAGACCAAAGAGGGGGACCTTCGGGCCTCTCACTATCGGATGAACCCAGATGGGATTAGCTAGTAGGCGGGGTAACGGCCCACCTAGGCGACGATCCCTAGCTGGTCTGAGAGGATGACCAGCCACACTGGAACTGAGACACGGTCCAGACTCCTACGGGAGGCAGCAGTGGGGAATATTGCACAATGGGCGCAAGCCTGATGCAGCCATGCCGCGTGTATGAAGAAGGCCTTCGGGTTGTAAAGTACTTTCAGCGGGGAGGAAGGC…	1411	Pseudomonadota	Gammaproteobacteria	Enterobacterales	Erwiniaceae	0	0	2491	99.29	Pantoea ananatis	Pantoea	291	OTU25	OTU25	0	100	None
P1-6EB-C	OM164365	P12	Experimental/Fg-treated Silks	P	CO430	B	27F	8	0.00566572	TGCAGTCGGACGGTAGCACANNNNAGCTTGCTCCTCGGGTGACGAGTGGCGGACGGGTGAGTAATGTCTGGGGATCTGCCCGATAGAGGGGGATAACCACTGGAAACGGTGGCTAATACCGCATAACGTCGCAAGACCAAAGAGGGGGACCTTCGGGCCTCTCACTATCGGATGAACCCAGATGGGATTAGCTAGTAGGCGGGGTAACGGCCCACCTAGGCGACGATCCCTAGCTGGTCTGAGAGGATGACCAGCCACACTGGAACTGAGACACGGTCCAGACTCCTACGGGAGGCAGCAGTGGGGAATATTGCACAATGGGCGCAAGCCTGATGCAGCCATGCCGCGTGTATGAAGAAGGCCTTCGGGTTGTAAAGTACTTTCAGCGGGGAGGAAGGC…	1412	Pseudomonadota	Gammaproteobacteria	Enterobacterales	Erwiniaceae	0	0	2496	99.29	Pantoea ananatis	Pantoea	265&267&270&276&291	OTU25	OTU25	0	100	None
P1-1EB-B	OM241024	P33	Experimental/Fg-treated Silks	P	CO449	B	27F	21	0.0208748	TAAGCGCCCTCCCGAAGGNTAAGCTACCTACTTCTTTTGCAACCCACTCCCATGGTGTGACGGGCGGTGTGTACAAGGCCCGGGAACGTATTCACCGTGGCATTCTGATCCACGATTACTAGCGATTCCGACTTCACGGAGTCGAGTTGCAGACTCCGATCCGGACTACGACGCACTTTATGAGGTCCGCTTGCTCTCGCGAGGTCGCTTCTCTTTGTATGCGCCATTGTAGCACGTGTGTAGCCCTACTCGTAAGGGCCATGATGACTTGACGTCATCCCCACCTTCCTCCGGTTTATCACCGGCAGTCTCCTTTGAGTTCCCGACCGAATCGCTGGCAACAAAGGATAAGGGTTGCGCTCGTTGCGGGACTTAACCCAACATTTCACAACACGAGCT…	1006	Pseudomonadota	Gammaproteobacteria	Enterobacterales	Erwiniaceae	0	0	1726	98.38	Pantoea ananatis	Pantoea	289&290&291&292	OTU25	0	OTU25	99.21	2 N mismatches
P1-5EB-D	OM240977	P35	Experimental/Fg-treated Silks	P	CO431	B	27F	39	0.0375	TGCAGTCGGACGGTAGCACAGAGGAGCTTGCTCCTCGGGTGACGAGTGGCGGACGGGTGAGTAATGTCTGGGGATCTGCCCGATAGAGGGGGATAACCACTGGAAACGGTGGCTAATACCGCATAACGTCGCAAGACCAAAGAGGGGGACCTTCGGGCCTCTCACTATCGGATGAACCCAGATGGGATTAGCTAGTAGGCGGGGTAACGGCCCACCTAGGCGACGATCCCTAGCTGGTCTGAGAGGATGACCAGCCACACTGGAACTGAGACACGGTCCAGACTCCTACGGGAGGCAGCAGTGGGGAATATTGCACAATGGGCGCAAGCCTGATGCAGCCATGCCGCGTGTATGAAGAAGGCCTTCGGGTTGTAAAGTACTTTCAGCGGGGAGGAAGGC…	1040	Pseudomonadota	Gammaproteobacteria	Enterobacterales	Erwiniaceae	0	0	1689	96.84	Pantoea ananatis	Pantoea	291&267&265&264&276	OTU25	0	OTU25	98.43	4 N(&space) mismatches
P1-5EB-E	OM164376	P40	Experimental/Fg-treated Silks	P	CO431	B	27F	2	0.00141743	TGCAGTCGGACGGTAGCACAGAGGAGCTTGCTCCTCGGGTGACGAGTGGCGGACGGGTGAGTAATGTCTGGGGATCTGCCCGATAGAGGGGGATAACCACTGGAAACGGTGGCTAATACCGCATAACGTCGCAAGACCAAAGAGGGGGACCTTCGGGCCTCTCACTATCGGATGAACCCAGATGGGATTAGCTAGTAGGCGGGGTAACGGCCCACCTAGGCGACGATCCCTAGCTGGTCTGAGAGGATGACCAGCCACACTGGAACTGAGACACGGTCCAGACTCCTACGGGAGGCAGCAGTGGGGAATATTGCACAATGGGCGCAAGCCTGATGCAGCCATGCCGCGTGTATGAAGAAGGCCTTCGGGTTGTAAAGTACTTTCAGCGGGGAGGAAGGC…	1411	Pseudomonadota	Gammaproteobacteria	Enterobacterales	Erwiniaceae	0	0	2502	99.64	Pantoea ananatis	Pantoea	291	OTU25	OTU25	0	100	None
P1-5EB-C	OM164377	P41	Experimental/Fg-treated Silks	P	CO431	B	27F	10	0.00724638	TGCAGTCGGACGGTAGCACANNAGGAGCTTGCTCCTCGGGTGACGAGTGGCGGACGGGTGAGTAATGTCTGGGGATCTGCCCGATAGAGGGGGATAACCACTGGAAACGGTGGCTAATACCGCATAACGTCGCAAGACCAAAGAGGGGGACCTTCGGGCCTCTCACTATCGGATGAACCCAGATGGGATTAGCTAGTAGGCGGGGTAACGGCCCACCTAGGCGACGATCCCTAGCTGGTCTGAGAGGATGACCAGCCACACTGGAACTGAGACACGGTCCAGACTCCTACGGGAGGCAGCAGTGGGGAATATTGCACAATGGGCGCAAGCCTGATGCAGCCATGCCGCGTGTATGAAGAAGGCCTTCGGGTTGTAAAGTACTTTCAGCGGGGAGGAAGG…	1380	Pseudomonadota	Gammaproteobacteria	Enterobacterales	Erwiniaceae	0	0	2424	98.98	Pantoea ananatis	Pantoea	291	OTU25	0	OTU25	99.61	1 N mismatch
P1-5EB-H	OM241089	P49	Experimental/Fg-treated Silks	P	CO431	B	27F	18	0.0172579	TAAGCGCCCTCCCGAAGGNTAAGCTACCTACTTCTTTTGCAACCCACTCCCATGGTGTGACGGGCGGTGTGTACAAGGCCCGGGAACGTATTCACCGTGGCATTCTGATCCACGATTACTAGCGATTCCGACTTCACGGAGTCGAGTTGCAGACTCCGATCCGGACTACGACGCACTTTATGAGGTCCGCTTGCTCTCGCGAGGTCGCTTCTCTTTGTATGCGCCATTGTAGCACGTGTGTAGCCCTACTCGTAAGGGCCATGATGACTTGACGTCATCCCCACCTTCCTCCGGTTTATCACCGGCAGTCTCCTTTGAGTTCCCGACCGAATCGCTGGCAACAAAGGATAAGGGTTGCGCTCGTTGCGGGACTTAACCCAACATTTCACAACACGAGCT…	1043	Pseudomonadota	Gammaproteobacteria	Enterobacterales	Erwiniaceae	0	0	1834	97.8	Pantoea ananatis	Pantoea	271	OTU25	0	OTU25	97.64	6 N mismatches, with P49-Reverse sequence
P1-5EB-G	OM164382	P52	Experimental/Fg-treated Silks	P	CO431	B	27F	1	0.000708717	TGCAAGTCGGACGGTAGCACAGAGGAGCTTGCTCCTCGGGTGACGAGTGGCGGACGGGTGAGTAATGTCTGGGGATCTGCCCGATAGAGGGGGATAACCACTGGAAACGGTGGCTAATACCGCATAACGTCGCAAGACCAAAGAGGGGGACCTTCGGGCCTCTCACTATCGGATGAACCCAGATGGGATTAGCTAGTAGGCGGGGTAACGGCCCACCTAGGCGACGATCCCTAGCTGGTCTGAGAGGATGACCAGCCACACTGGAACTGAGACACGGTCCAGACTCCTACGGGAGGCAGCAGTGGGGAATATTGCACAATGGGCGCAAGCCTGATGCAGCCATGCCGCGTGTATGAAGAAGGCCTTCGGGTTGTAAAGTACTTTCAGCGGGGAGGAAGG…	1411	Pseudomonadota	Gammaproteobacteria	Enterobacterales	Erwiniaceae	0	0	2516	99.72	Pantoea ananatis	Pantoea	291	OTU25	OTU25	0	100	None
P1-19EB-H	OM241021	P54	Experimental/Fg-treated Silks	P	P9855HR	B	27F	11	0.0111111	GGTAGCGCCCTCCCGAAGGTTAAGCTACCTACTTCTTTTGCAACCCACTCCCATGGTGTGACGGGCGGTGTGTACAAGGCCCGGGAACGTATTCACCGTGGCATTCTGATCCACGATTACTAGCGATTCCGACTTCACGGAGTCGAGTTGCAGACTCCGATCCGGACTACGACGCACTTTATGAGGTCCGCTTGCTCTCGCGAGGTCGCTTCTCTTTGTATGCGCCATTGTAGCACGTGTGTAGCCCTACTCGTAAGGGCCATGATGACTTGACGTCATCCCCACCTTCCTCCGGTTTATCACCGGCAGTCTCCTTTGAGTTCCCGACCGAATCGCTGGCAACAAAGGATAAGGGTTGCGCTCGTTGCGGGACTTAACCCAACATTTCACAACACGAGC…	990	Pseudomonadota	Gammaproteobacteria	Enterobacterales	Erwiniaceae	Pantoea	0	1737	98.78	Pantoea ananatis	Pantoea	289&290&291&292	OTU25	0	OTU25	98.43	4 N mismatches
P1-6EB-B	OM164384	P55	Experimental/Fg-treated Silks	P	CO430	B	27F	9	0.00639659	TGCAGTCGGACGGTAGCACNNNNNAGCTTGCTCCTCGGGTGACGAGTGGCGGACGGGTGAGTAATGTCTGGGGATCTGCCCGATAGAGGGGGATAACCACTGGAAACGGTGGCTAATACCGCATAACGTCGCAAGACCAAAGAGGGGGACCTTCGGGCCTCTCACTATCGGATGAACCCAGATGGGATTAGCTAGTAGGCGGGGTAACGGCCCACCTAGGCGACGATCCCTAGCTGGTCTGAGAGGATGACCAGCCACACTGGAACTGAGACACGGTCCAGACTCCTACGGGAGGCAGCAGTGGGGAATATTGCACAATGGGCGCAAGCCTGATGCAGCCATGCCGCGTGTATGAAGAAGGCCTTCGGGTTGTAAAGTACTTTCAGCGGGGAGGAAGGC…	1407	Pseudomonadota	Gammaproteobacteria	Enterobacterales	Erwiniaceae	0	0	2474	99.07	Pantoea ananatis	Pantoea	265&267&270&276&291	OTU25	OTU25	0	100	None
P1-6ET-B	OM164408	Q39	Experimental/Fg-treated Silks	P	CO430	T	27F	5	0.00353607	TGCAAGTCGGACGGTAGCACANNNGGAGCTTGCTCCTCGGGTGACGAGTGGCGGACGGGTGAGTAATGTCTGGGGATCTGCCCGATAGAGGGGGATAACCACTGGAAACGGTGGCTAATACCGCATAACGTCGCAAGACCAAAGAGGGGGACCTTCGGGCCTCTCACTATCGGATGAACCCAGATGGGATTAGCTAGTAGGCGGGGTAACGGCCCACCTAGGCGACGATCCCTAGCTGGTCTGAGAGGATGACCAGCCACACTGGAACTGAGACACGGTCCAGACTCCTACGGGAGGCAGCAGTGGGGAATATTGCACAATGGGCGCAAGCCTGATGCAGCCATGCCGCGTGTATGAAGAAGGCCTTCGGGTTGTAAAGTACTTTCAGCGGGGAGGAAG…	1414	Pseudomonadota	Gammaproteobacteria	Enterobacterales	Erwiniaceae	0	0	2497	99.22	Pantoea ananatis	Pantoea	276	OTU25	OTU25	0	100	None
P1-6ET-E	OM240987	Q48	Experimental/Fg-treated Silks	P	CO430	T	27F	46	0.044316	TGCNAGTCGGACGGTAGCACNNNNNNAGCTTGCTCCTCGGGTGACGAGTGGCGGACGGGTGAGTAATGTCTGGGGATCTGCCCGATAGAGGGGGATAACCACTGGAAACGGTGGCTAATACCGCATAACGTCGCAAGACCAAAGAGGGGGACCTTCGGGCCTCTCACTATCGGATGAACCCAGATGGGATTAGCTAGTAGGCGGGGTAACGGCCCACCTAGGCGACGATCCCTAGCTGGTCTGAGAGGATGACCAGCCACACTGGAACTGAGACACGGTCCAGACTCCTACGGGAGGCAGCAGTGGGGAATATTGCACAATGGGCGCAAGCCTGATGCAGCCATGCCGCGTGTATGAAGAAGGCCTTCGGGTTGTAAAGTACTTTCAGCGGGGAGGAAG…	1038	Pseudomonadota	Gammaproteobacteria	Enterobacterales	Erwiniaceae	0	0	1659	95.87	Pantoea ananatis	Pantoea	291&267&264&276&265&270	OTU25	0	OTU25	99.61	1 N mismatch
P1-5ET-N	MT777216	Q68	Experimental/Fg-treated Silks	P	CO431	T	27F	7	0.00513196	AAGGAGCTTGCTCCTCGGGTGACGAGTGGCGGACGGGTGAGTAATGTCTGGGGATCTGCCCGATAGAGGGGGATAACCACTGGAAACGGTGGCTAATACCGCATAACGTCGCAAGACCAAAGAGGGGGACCTTCGGGCCTCTCACTATCGGATGAACCCAGATGGGATTAGCTAGTAGGCGGGGTAACGGCCCACCTAGGCGACGATCCCTAGCTGGTCTGAGAGGATGACCAGCCACACTGGAACTGAGACACGGTCCAGACTCCTACGGGAGGCAGCAGTGGGGAATATTGCACAATGGGCGCAAGCCTGATGCAGCCATGCCGCGTGTATGAAGAAGGCCTTCGGGTTGTAAAGTACTTTCAGCGGGGAGGAAGGCGATGTGGTTAATAACCGCNT…	1364	Pseudomonadota	Gammaproteobacteria	Enterobacterales	Erwiniaceae	0	0	2457	99.27	Pantoea ananatis	Pantoea	270&276	OTU25	0	OTU25	99.61	1 N mismatch
P1-5ET-D	MT777219	R12	Experimental/Fg-treated Silks	P	CO431	T	27F	8	0.00577201	CATGCAGTCGGACGGTAGNCACANAAGGAGCTTGCTCCTCGGGTGACGAGTGGCGGACGGGTGAGTAATGTCTGGGGATCTGCCCGATAGAGGGGGATAACCACTGGAAACGGTGGCTAATACCGCATAACGTCGCAAGACCAAAGAGGGGGACCTTCGGGCCTCTCACTATCGGATGAACCCAGATGGGATTAGCTAGTAGGCGGGGTAACGGCCCACCTAGGCGACGATCCCTAGCTGGTCTGAGAGGATGACCAGCCACACTGGAACTGAGACACGGTCCAGACTCCTACGGGAGGCAGCAGTGGGGAATATTGCACAATGGGCGCAAGCCTGATGCAGCCATGCCGCGTGTATGAAGAAGGCCTTCGGGTTGTAAAGTACTTTCAGCGGGGAGGA…	1386	Pseudomonadota	Gammaproteobacteria	Enterobacterales	Erwiniaceae	0	0	2488	99.06	Pantoea ananatis	Pantoea	270&276&291	OTU25	0	OTU25	98.83	3 N mismatches
P1-19ET-D	OM241061	R80	Experimental/Fg-treated Silks	P	P9855HR	T	27F	8	0.00842993	CGCCCTCCCGAAGGNTAAGCTACCTACTTCTTTTGCAACCCACTCCCATGGTGTGACGGGCGGTGTGTACAAGGCCCGGGAACGTATTCACCGTGGCATTCTGATCCACGATTACTAGCGATTCCGACTTCACGGAGTCGAGTTGCAGACTCCGATCCGGACTACGACGCACTTTATGAGGTCCGCTTGCTCTCGCGAGGTCGCTTCTCTTTGTATGCGCCATTGTAGCACGTGTGTAGCCCTACTCGTAAGGGCCATGATGACTTGACGTCATCCCCACCTTCCTCCGGTTTATCACCGGCAGTCTCCTTTGAGTTCCCGACCGAATCGCTGGCAACAAAGGATAAGGGTTGCGCTCGTTGCGGGACTTAACCCAACATTTCACAACACGAGCTGACG…	949	Pseudomonadota	Gammaproteobacteria	Enterobacterales	Erwiniaceae	Pantoea	0	1712	98.95	Pantoea ananatis	Pantoea	270&271&289&290&291&292	OTU25	0	OTU25	97.24	7 N mismatches
P1-18ET-A	MT777185	S45	Experimental/Fg-treated Silks	P	P38157	T	27F	7	0.007431	CATGCAAGTCGGACGGTAGCACANNAGGAGCTTGCTCCTCGGGTGACGAGTGGCGGACGGGTGAGTAATGTCTGGGGATCTGCCCGATAGAGGGGGATAACCACTGGAAACGGTGGCTAATACCGCATAACGTCGCAAGACCAAAGAGGGGGACCTTCGGGCCTCTCACTATCGGATGAACCCAGATGGGATTAGCTAGTAGGCGGGGTAACGGCCCACCTAGGCGACGATCCCTAGCTGGTCTGAGAGGATGACCAGCCACACTGGAACTGAGACACGGTCCAGACTCCTACGGGAGGCAGCAGTGGGGAATATTGCACAATGGGCGCAAGCCTGATGCAGCCATGCCGCGTGTATGAAGAAGGCCTTCGGGTTGTAAAGTACTTTCAGCGGGGAGGA…	942	Pseudomonadota	Gammaproteobacteria	Enterobacterales	Erwiniaceae	0	0	1688	98.83	Pantoea ananatis	Pantoea	291&267&264&276&265&270	OTU25	OTU25	0	100	None
P1-18ET-H	OM164474	S61	Experimental/Fg-treated Silks	P	P38157	T	27F	1	0.00070922	TGCAGTCGGACGGTAGCACAGAGGAGCTTGCTCCTCGGGTGACGAGTGGCGGACGGGTGAGTAATGTCTGGGGATCTGCCCGATAGAGGGGGATAACCACTGGAAACGGTGGCTAATACCGCATAACGTCGCAAGACCAAAGAGGGGGACCTTCGGGCCTCTCACTATCGGATGAACCCAGATGGGATTAGCTAGTAGGCGGGGTAACGGCCCACCTAGGCGACGATCCCTAGCTGGTCTGAGAGGATGACCAGCCACACTGGAACTGAGACACGGTCCAGACTCCTACGGGAGGCAGCAGTGGGGAATATTGCACAATGGGCGCAAGCCTGATGCAGCCATGCCGCGTGTATGAAGAAGGCCTTCGGGTTGTAAAGTACTTTCAGCGGGGAGGAAGGC…	1410	Pseudomonadota	Gammaproteobacteria	Enterobacterales	Erwiniaceae	0	0	2508	99.72	Pantoea ananatis	Pantoea	291	OTU25	OTU25	0	100	None
P1-8ET-F	MT777186	T38	Experimental/Fg-treated Silks	P	CO325	T	27F	10	0.0101523	CGCCCTCCCGAAGGNTAAGCTACCTACTTCTTTTGCAACCCACTCCCATGGTGTGACGGGCGGTGTGTACAAGGCCCGGGAACGTATTCACCGTGGCATTCTGATCCACGATTACTAGCGATTCCGACTTCACGGAGTCGAGTTGCAGACTCCGATCCGGACTACGACGCACTTTATGAGGTCCGCTTGCTCTCGCGAGGTCGCTTCTCTTTGTATGCGCCATTGTAGCACGTGTGTAGCCCTACTCGTAAGGGCCATGATGACTTGACGTCATCCCCACCTTCCTCCGGTTTATCACCGGCAGTCTCCTTTGAGTTCCCGACCGAATCGCTGGCAACAAAGGATAAGGGTTGCGCTCGTTGCGGGACTTAACCCAACATTTCACAACACGAGCTGACG…	985	Pseudomonadota	Gammaproteobacteria	Enterobacterales	Erwiniaceae	Pantoea	0	1768	98.68	Pantoea ananatis	Pantoea	289&290&291&292	OTU25	0	OTU25	97.24	7 N mismatches
P1-8ET-J	MT777229	T41	Experimental/Fg-treated Silks	P	CO325	T	27F	15	0.0151515	TGGTAGCGCCCTCCCGAAGGNTAAGCTACCTACTTCTTTTGCAACCCACTCCCATGGTGTGACGGGCGGTGTGTACAAGGCCCGGGAACGTATTCACCGTGGCATTCTGATCCACGATTACTAGCGATTCCGACTTCACGGAGTCGAGTTGCAGACTCCGATCCGGACTACGACGCACTTTATGAGGTCCGCTTGCTCTCGCGAGGTCGCTTCTCTTTGTATGCGCCATTGTAGCACGTGTGTAGCCCTACTCGTAAGGGCCATGATGACTTGACGTCATCCCCACCTTCCTCCGGTTTATCACCGGCAGTCTCCTTTGAGTTCCCGACCGAATCGCTGGCAACAAAGGATAAGGGTTGCGCTCGTTGCGGGACTTAACCCAACATTTCACAACACGAG…	990	Pseudomonadota	Gammaproteobacteria	Enterobacterales	Erwiniaceae	Pantoea	0	1759	98.19	Pantoea anthophila/ Pantoea ananatis	Pantoea	289&290&291&292	OTU25	0	OTU25	97.24	7 N mismatches
P1-16ET-C	MT777187	T52	Experimental/Fg-treated Silks	P	CO462	T	27F	18	0.0175268	CCCTCCCGAAGGTTAAGCTACCTACTTCTTTTGCAACCCACTCCCATGGTGTGACGGGCGGTGTGTACAAGGCCCGGGAACGTATTCACCGTGGCATTCTGATCCACGATTACTAGCGATTCCGACTTCACGGAGTCGAGTTGCAGACTCCGATCCGGACTACGACGCACTTTATGAGGTCCGCTTGCTCTCGCGAGGTCGCTTCTCTTTGTATGCGCCATTGTAGCACGTGTGTAGCCCTACTCGTAAGGGCCATGATGACTTGACGTCATCCCCACCTTCCTCCGGTTTATCACCGGCAGTCTCCTTTGAGTTCCCGACCGAATCGCTGGCAACAAAGGATAAGGGTTGCGCTCGTTGCGGGACTTAACCCAACATTTCACAACACGAGCTGACGAC…	1027	Pseudomonadota	Gammaproteobacteria	Enterobacterales	Erwiniaceae	Pantoea	Pantoea ananatis	1746	97.58	Pantoea ananatis	Pantoea	271&289&290&291&292	OTU25	0	OTU25	96.85	8 N mismatches
P1-13ET-C	OM241048	T59	Experimental/Fg-treated Silks	P	CO444	T	27F	11	0.0114345	ACTTCTTTTGCAACCCACTCCCATGGTGTGACGGGCGGTGTGTACAAGGCCCGGGAACGTATTCACCGTGGCATTCTGATCCACGATTACTAGCGATTCCGACTTCACGGAGTCGAGTTGCAGACTCCGATCCGGACTACGACGCACTTTATGAGGTCCGCTTGCTCTCGCGAGGTCGCTTCTCTTTGTATGCGCCATTGTAGCACGTGTGTAGCCCTACTCGTAAGGGCCATGATGACTTGACGTCATCCCCACCTTCCTCCGGTTTATCACCGGCAGTCTCCTTTGAGTTCCCGACCGAATCGCTGGCAACAAAGGATAAGGGTTGCGCTCGTTGCGGGACTTAACCCAACATTTCACAACACGAGCTGACGACAGCCATGCAGCACCTGTCTCAGA…	962	Pseudomonadota	Gammaproteobacteria	Enterobacterales	Erwiniaceae	Pantoea	0	1680	98.65	Pantoea ananatis	Pantoea	289&290&291&292	OTU25	0	OTU25	96.85	7 N mismatches, 1 non-N mismatch (space)
P1-13ET-J	OM241035	T61	Experimental/Fg-treated Silks	P	CO444	T	27F	28	0.0265152	TGGTAAGCGCCCTCCCGAAGGTTAAGCTACCTACTTCTTTTGCAACCCACTCCCATGGTGTGACGGGCGGTGTGTACAAGGCCCGGGAACGTATTCACCGTGGCATTCTGATCCACGATTACTAGCGATTCCGACTTCACGGAGTCGAGTTGCAGACTCCGATCCGGACTACGACGCACTTTATGAGGTCCGCTTGCTCTCGCGAGGTCGCTTCTCTTTGTATGCGCCATTGTAGCACGTGTGTAGCCCTACTCGTAAGGGCCATGATGACTTGACGTCATCCCCACCTTCCTCCGGTTTATCACCGGCAGTCTCCTTTGAGTTCCCGACCGAATCGCTGGCAACAAAGGATAAGGGTTGCGCTCGTTGCGGGACTTAACCCAACATTTCACAACACGA…	242&1056	Pseudomonadota	Gammaproteobacteria	Enterobacterales	Erwiniaceae	Pantoea	Pantoea ananatis	1767	99.4	Pantoea ananatis	Pantoea	289&290&291&292	OTU25	0	OTU25	99.21	2 N mismatches
P1-13EB-F	OM262830	T70	Experimental/Fg-treated Silks	P	CO444	B	27F	11	0.00805861	AAGGAGCTTGCTCCTCGGGTGACGAGTGGCGGACGGGTGAGTAATGTCTGGGGATCTGCCCGATAGAGGGGGATAACCACTGGAAACGGTGGCTAATACCGCATAACGTCGCAAGACCAAAGAGGGGGACCTTCGGGCCTCTCACTATCGGATGAACCCANATGGGATTAGCTAGTAGGCGGGGTAATGGCCCACCTAGGCGACGATCCCTAGCTGGTCTGAGAGGATGACCAGCCACACTGGAACTGAGACACGGTCCAGACTCCTACGGGAGGCAGCAGTGGGGAATATTGCACAATGGGCGCAAGCCTGATGCACCCATGCCGCGTGTATGAANAANGCCTTCGGGTTGTAAAGTACTTTCAGCGGGGAGGAAGGCGATGTGGTTAATAACCGCGT…	1365	Pseudomonadota	Gammaproteobacteria	Enterobacterales	Erwiniaceae	0	0	2362	98.53	Pantoea agglomerans	Pantoea	261	OTU25	0	OTU25	98.44	4 N mismatches
P1-1ET-J	OM164505	T73	Experimental/Fg-treated Silks	P	CO449	T	27F	3	0.00213675	TGCAGTCGGANGGTAGCACAGAGGAGCTTGCTCCTCGGGTGACGAGTGGCGGACGGGTGAGTAATGTCTGGGGATCTGCCCGATAGAGGGGGATAACCACTGGAAACGGTGGCTAATACCGCATAACGTCGCAAGACCAAAGAGGGGGACCTTCGGGCCTCTCACTATCGGATGAACCCAGATGGGATTAGCTAGTAGGCGGGGTAACGGCCCACCTAGGCGACGATCCCTAGCTGGTCTGAGAGGATGACCAGCCACACTGGAACTGAGACACGGTCCAGACTCCTACGGGAGGCAGCAGTGGGGAATATTGCACAATGGGCGCAAGCCTGATGCAGCCATGCCGCGTGTATGAAGAAGGCCTTCGGGTTGTAAAGTACTTTCAGCGGGGAGGAAGGC…	1404	Pseudomonadota	Gammaproteobacteria	Enterobacterales	Erwiniaceae	0	0	2491	99.5	Pantoea ananatis	Pantoea	292	OTU25	OTU25	0	100	None
L1-1ET-B	OM164509	T79	Experimental/Fg-treated Silks	L	CO449	T	27F	3	0.00212766	TGCAGTCGGACGGTAGCACAGAGGAGCTTGCTCCTCGGGTGACGAGTGGCGGACGGGTGAGTAATGTCTGGGGATCTGCCCGATAGAGGGGGATAACCACTGGAAACGGTGGCTAATACCGCATAACGTCGCAAGACCAAAGAGGGGGACCTTCGGGCCTCTCACTATCGGATGAACCCAGATGGGATTAGCTAGTAGGCGGGGTAACGGCCCACCTAGGCGACGATCCCTAGCTGGTCTGAGAGGATGACCAGCCACACTGGAACTGAGACACGGTCCAGACTCCTACGGGAGGCAGCAGTGGGGAATATTGCACAATGGGCGCAAGCCTGATGCAGCCATGCCGCGTGTATGAAGAAGGCCTTCGGGTTGTAAAGTACTTTCAGCGGGGAGGAAGGC…	1410	Pseudomonadota	Gammaproteobacteria	Enterobacterales	Erwiniaceae	0	0	2501	99.57	Pantoea ananatis	Pantoea	291&292	OTU25	OTU25	0	100	None
P1-13EB-J	OM164512	U06	Experimental/Fg-treated Silks	P	CO444	B	27F	2	0.00141945	AGTCGGACGGTAGCACAGAGGAGCTTGCTCCTCGGGTGACGAGTGGCGGACGGGTGAGTAATGTCTGGGGATCTGCCCGATAGAGGGGGATAACCACTGGAAACGGTGGCTAATACCGCATAACGTCGCAAGACCAAAGAGGGGGACCTTCGGGCCTCTCACTATCGGATGAACCCAGATGGGATTAGCTAGTAGGCGGGGTAATGGCCCACCTAGGCGACGATCCCTAGCTGGTCTGAGAGGATGACCAGCCACACTGGAACTGAGACACGGTCCAGACTCCTACGGGAGGCAGCAGTGGGGAATATTGCACAATGGGCGCAAGCCTGATGCAGCCATGCCGCGTGTATGAAGAAGGCCTTCGGGTTGTAAAGTACTTTCAGCGGGGAGGAAGGCGAT…	1409	Pseudomonadota	Gammaproteobacteria	Enterobacterales	Erwiniaceae	0	0	2543	99.22	Pantoea agglomerans	Pantoea	260	OTU25	OTU25	0	100	None
P1-8ET-L	OM241062	U11	Experimental/Fg-treated Silks	P	CO325	T	27F	5	0.0052356	CGCCCTCCCGAAGGNTAAGCTACCTACTTCTTTTGCAACCCACTCCCATGGTGTGACGGGCGGTGTGTACAAGGCCCGGGAACGTATTCACCGTGGCATTCTGATCCACGATTACTAGCGATTCCGACTTCACGGAGTCGAGTTGCAGACTCCGATCCGGACTACGACGCACTTTATGAGGTCCGCTTGCTCTCGCGAGGTCGCTTCTCTTTGTATGCGCCATTGTAGCACGTGTGTAGCCCTACTCGTAAGGGCCATGATGACTTGACGTCATCCCCACCTTCCTCCGGTTTATCACCGGCAGTCTCCTTTGAGTTCCCGACCGAATCGCTGGCAACAAAGGATAAGGGTTGCGCTCGTTGCGGGACTTAACCCAACATTTCACAACACGAGCTGACG…	955	Pseudomonadota	Gammaproteobacteria	Enterobacterales	Erwiniaceae	Pantoea	Pantoea ananatis	1740	99.37	Pantoea ananatis	Pantoea	289&290&291&292	OTU25	0	OTU25	98.82	3 N mismatches
L1-13ET-O	OM241032	U19	Experimental/Fg-treated Silks	L	CO444	T	27F	15	0.0142315	TGGTAGCGCCCTCCCGAAGGTTAAGCTACCTACTTCTTTTGCAACCCACTCCCATGGTGTGACGGGCGGTGTGTACAAGGCCCGGGAACGTATTCACCGTGGCATTCTGATCCACGATTACTAGCGATTCCGACTTCACGGAGTCGAGTTGCAGACTCCGATCCGGACTACGACGCACTTTATGAGGTCCGCTTGCTCTCGCGAGGTCGCTTCTCTTTGTATGCGCCATTGTAGCACGTGTGTAGCCCTACTCGTAAGGGCCATGATGACTTGACGTCATCCCCACCTTCCTCCGGTTTATCACCGGCAGTCTCCTTTGAGTTCCCGACCGAATCGCTGGCAACAAAGGATAAGGGTTGCGCTCGTTGCGGGACTTAACCCAACATTTCACAACACGAG…	1054	Pseudomonadota	Gammaproteobacteria	Enterobacterales	Erwiniaceae	0	0	1829	98.29	Pantoea ananatis	Pantoea	289&290&291&292	OTU25	0	OTU25	99.21	2 N mismatches
L1-13ET-E	OM241026	U30	Experimental/Fg-treated Silks	L	CO444	T	27F	5	0.00502513	CGAAGGTTAAGCTACCTACTTCTTTTGCAACCCACTCCCATGGTGTGACGGGCGGTGTGTACAAGGCCCGGGAACGTATTCACCGTGGCATTCTGATCCACGATTACTAGCGATTCCGACTTCACGGAGTCGAGTTGCAGACTCCGATCCGGACTACGACGCACTTTATGAGGTCCGCTTGCTCTCGCGAGGTCGCTTCTCTTTGTATGCGCCATTGTAGCACGTGTGTAGCCCTACTCGTAAGGGCCATGATGACTTGACGTCATCCCCACCTTCCTCCGGTTTATCACCGGCAGTCTCCTTTGAGTTCCCGACCGAATCGCTGGCAACAAAGGATAAGGGTTGCGCTCGTTGCGGGACTTAACCCAACATTTCACAACACGAGCTGACGACAGCCAT…	995	Pseudomonadota	Gammaproteobacteria	Enterobacterales	Erwiniaceae	Pantoea	0	1754	99.1	Pantoea anthophila	Pantoea	289&290&291&292	OTU25	OTU25	0	100	None
L1-13EB-D	OM241084	U63	Experimental/Fg-treated Silks	L	CO444	B	27F	23	0.0219256	GTGGTAGCGCCCTCCCGAAGGNTAAGCTACCTACTTCTTTTGCAACCCACTCCCATGGTGTGACGGGCGGTGTGTACAAGGCCCGGGAACGTATTCACCGTGGCATTCTGATCCACGATTACTAGCGATTCCGACTTCACGGAGTCGAGTTGCAGACTCCGATCCGGACTACGACGCACTTTATGAGGTCCGCTTGCTCTCGCGAGGTCGCTTCTCTTTGTATGCGCCATTGTAGCACGTGTGTAGCCCTACTCGTAAGGGCCATGATGACTTGACGTCATCCCCACCTTCCTCCGGTTTATCACCGGCAGTCTCCTTTGAGTTCCCGACCGAATCGCTGGCAACAAAGGATAAGGGTTGCGCTCGTTGCGGGACTTAACCCAACATTTCACAACACGA…	1049	Pseudomonadota	Gammaproteobacteria	Enterobacterales	Erwiniaceae	Pantoea	Pantoea agglomerans	1779	97.34	Pantoea agglomerans	Pantoea	260&261	OTU25	0	OTU25	97.64	6 N mismatches
L1-16ET-H	MT355342	U70	Experimental/Fg-treated Silks	L	CO462	T	27F	4	0.0029347	AAGGAGCTTGCTCCTCGGGTGACGAGTGGCGGACGGGTGAGTAATGTCTGGGGATCTGCCCGATAGAGGGGGATAACCACTGGAAACGGTGGCTAATACCGCATAACGTCGCAAGACCAAAGAGGGGGACCTTCGGGCCTCTCACTATCGGATGAACCCANATGGGATTAGCTAGTAGGCGGGGTAACGGCCCACCTAGGCGACGATCCCTAGCTGGTCTGAGAGGATGACCAGCCACACTGGAACTGAGACACGGTCCAGACTCCTACGGGAGGCAGCAGTGGGGAATATTGCACAATGGGCGCAAGCCTGATGCAGCCATGCCGCGTGTATGAAGAAGGCCTTCCGGGTTGTAAAGTACTTTCAGCGGGGAGGAAGGCGATGTGGTTAATAACCGCA…	1363	Pseudomonadota	Gammaproteobacteria	Enterobacterales	Erwiniaceae	Pantoea	Pantoea ananatis	2405	99.49	Pantoea ananatis	Pantoea	290	OTU25	OTU25	0	100	None
L1-1ET-U	MT305798	V26	Experimental/Fg-treated Silks	L	CO449	T	27F	44	0.0429688	TGCAGTCGGANGGTAGCACAGAGGAGCTTGCTCCTCGGGTGACGAGTGGCGGACGGGTGAGTAATGTCTGGGGATCTGCCCGATAGAGGGGGATAACCACTGGAAACGGTGGCTAATACCGCATAACGTCGCAAGACCAAAGAGGGGGACCTTCGGGCCTCTCACTATCGGATGAACCCAGATGGGATTAGCTAGTAGGCGGGGTAACGGCCCACCTAGGCGACGATCCCTAGCTGGTCTGAGAGGATGACCAGCCACACTGGAACTGAGACACGGTCCAGACTCCTACGGGAGGCAGCAGTGGGGAATATTGCACAATGGGCGCAAGCCTGATGCAGCCATGCCGCGTGTATGAAGAAGGCCTTCGGGTTGTAAAGTACTTTCAGCGGGGAGGAAGGC…	1024	Pseudomonadota	Gammaproteobacteria	Enterobacterales	Erwiniaceae	0	0	1632	95.36	Pantoea ananatis	Pantoea	292&291&267&264&276&265&270	OTU25	0	OTU25	98.02Forward	5 N mismatches
L1-11CT-E	OM164443	R67	Control/Healthy Silks	L	CO452	T	27F	4	0.00284091	ATGCAGTCGAGCGGANGACANGGAGCTTGCTCCTGGATTCAGCGGCGGACGGGTGAGTAATGCCTAGGAATCTGCCTGGTAGTGGGGGACAACGTTTCGAAAGGAACGCTAATACCGCATACGTCCTACGGGAGAAAGCAGGGGACCTTCGGGCCTTGCGCTATCAGATGAGCCTAGGTCGGATTAGCTTGTTGGTGAGGTAATGGCTCACCAAGGCGACGATCCGTAACTGGTCTGAGAGGATGATCAGTCACACTGGAACTGAGACACGGTCCAGACTCCTACGGGAGGCAGCAGTGGGGAATATTGGACAATGGGCGAAAGCCTGATCCAGCCATGCCGCGTGTGTGAAGAAGGTCTTCGGATTGTAAAGCACTTTAAGTTGGGAGGAAGGGTTGT…	1408	Pseudomonadota	Gammaproteobacteria	Pseudomonadales	Pseudomonadaceae	Pseudomonas	0	2566	99.64	Pseudomonas cremoricolorata	Pseudomonas	316	OTU28	OTU28	0	100	None
L1-3ET-B	OM164264	L46	Experimental/Fg-treated Silks	L	CO433	T	27F	2	0.00144092	GGAGCTTGCTCCTGGATTCAGCGGCGGACGGGTGAGTAATGCCTAGGAATCTGCCTGGTAGTGGGGGACAACGTTTCGAAAGGAACGCTAATACCGCATACGTCCTACGGGAGAAAGCAGGGGACCTTCGGGCCTTGCGCTATCAGATGAGCCTAGGTCGGATTAGCTTGTTGGTGAGGTAATGGCTCACCAAGGCGACGATCCGTAACTGGTCTGAGAGGATGATCAGTCACACTGGAACTGAGACACGGTCCAGACTCCTACGGGAGGCAGCAGTGGGGAATATTGGACAATGGGCGAAAGCCTGATCCAGCCATGCCGCGTGTGTGAAGAAGGTCTTCGGATTGTAAAGCACTTTAAGTTGGGAGGAAGGGTTGTAGATTAATACTCTGCAATTTT…	1388	Pseudomonadota	Gammaproteobacteria	Pseudomonadales	Pseudomonadaceae	Pseudomonas	Pseudomonas parafulva	2477	99.71	Pseudomonas parafulva	Pseudomonas	314	OTU28	OTU28	0	100	none
L1-18ET-G	OM164485	T17	Experimental/Fg-treated Silks	L	P38157	T	27F	4	0.00284091	CATGCAAGTCGAGCGGANGANGGGAGCTTGCTCCTTGATTCAGCGGCGGACGGGTGAGTAATGCCTAGGAATCTGCCTGGTAGTGGGGGACAACGTTTCGAAAGGAACGCTAATACCGCATACGTCCTACGGGAGAAAGCAGGGGACCTTCGGGCCTTGCGCTATCAGATGAGCCTAGGTCGGATTAGCTTGTTGGTGAGGTAATGGCTCACCAAGGCGACGATCCGTAACTGGTCTGAGAGGATGATCAGTCACACTGGAACTGAGACACGGTCCAGACTCCTACGGGAGGCAGCAGTGGGGAATATTGGACAATGGGCGAAAGCCTGATCCAGCCATGCCGCGTGTGTGAAGAAGGTCTTCGGATTGTAAAGCACTTTAAGTTGGGAGGAAGGGTTG…	1408	Pseudomonadota	Gammaproteobacteria	Pseudomonadales	Pseudomonadaceae	Pseudomonas	Pseudomonas parafulva	2573	99.64	Pseudomonas parafulva	Pseudomonas	317	OTU28	OTU28	0	100	None
L1-1ET-O	OM164518	U28	Experimental/Fg-treated Silks	L	CO449	T	27F	1	0.000714796	AGTCGAGCGGANGACGGGAGCTTGCTCCTTGATTCAGCGGCGGACGGGTGAGTAATGCCTAGGAATCTGCCTGGTAGTGGGGGACAACGTTTCGAAAGGAACGCTAATACCGCATACGTCCTACGGGAGAAAGCAGGGGACCTTCGGGCCTTGCGCTATCAGATGAGCCTAGGTCGGATTAGCTAGTTGGTGGGGTAATGGCTCACCAAGGCGACGATCCGTAACTGGTCTGAGAGGATGATCAGTCACACTGGAACTGAGACACGGTCCAGACTCCTACGGGAGGCAGCAGTGGGGAATATTGGACAATGGGCGAAAGCCTGATCCAGCCATGCCGCGTGTGTGAAGAAGGTCTTCGGATTGTAAAGCACTTTAAGTTGGGAGGAAGGGCAGTAAGTT…	1399	Pseudomonadota	Gammaproteobacteria	Pseudomonadales	Pseudomonadaceae	Pseudomonas	Pseudomonas monteilii	2511	99.79	Pseudomonas monteilii	Pseudomonas	313	OTU28	OTU28	0	100	None
L1-13EB-H	OM164546	V27	Experimental/Fg-treated Silks	L	CO444	B	27F	6	0.00432277	AGTCGAGCGGANGANGGGAGCTTGCTNCNNGATTCAGCGGCGGACGGGTGAGTAATGCCTAGGAATCTGCCTGGTAGTGGGGGACAACGTTTCGAAAGGAACGCTAATACCGCATACGTCCTACGGGAGAAAGCAGGGGACCTTCGGGCCTTGCGCTATCAGATGAGCCTAGGTCGGATTAGCTTGTTGGTGAGGTAATGGCTCACCAAGGCGACGATCCGTAACTGGTCTGAGAGGATGATCAGTCACACTGGAACTGAGACACGGTCCAGACTCCTACGGGAGGCAGCAGTGGGGAATATTGGACAATGGGCGAAAGCCTGATCCAGCCATGCCGCGTGTGTGAAGAAGGTCTTCGGATTGTAAAGCACTTTAAGTTGGGAGGAAGGGTTGTAGATT…	1388	Pseudomonadota	Gammaproteobacteria	Pseudomonadales	Pseudomonadaceae	Pseudomonas	Pseudomonas parafulva	2478	99.64	Pseudomonas parafulva	Pseudomonas	317	OTU28	OTU28	0	100	None
P1-13ET-A	OM164552	V66	Experimental/Fg-treated Silks	P	CO444	T	27F	1	0.000720461	ATGCAGTCGAGCGGATGANGGGAGCTTGCTCCTTGATTCAGCGGCGGACGGGTGAGTAATGCCTAGGAATCTGCCTGGTAGTGGGGGACAACGTTTCGAAAGGAACGCTAATACCGCATACGTCCTACGGGAGAAAGCAGGGGACCTTCGGGCCTTGCGCTATCAGATGAGCCTAGGTCGGATTAGCTTGTTGGTGAGGTAATGGCTCACCAAGGCGACGATCCGTAACTGGTCTGAGAGGATGATCAGTCACACTGGAACTGAGACACGGTCCAGACTCCTACGGGAGGCAGCAGTGGGGAATATTGGACAATGGGCGAAAGCCTGATCCAGCCATGCCGCGTGTGTGAAGAAGGTCTTCGGATTGTAAAGCACTTTAAGTTGGGAGGAAGGGTTGTA…	1388	Pseudomonadota	Gammaproteobacteria	Pseudomonadales	Pseudomonadaceae	Pseudomonas	Pseudomonas parafulva	2494	99.86	Pseudomonas parafulva	Pseudomonas	317	OTU28	OTU28	0	100	None
P1-1ET-M	OM164553	V67	Experimental/Fg-treated Silks	P	CO449	T	27F	3	0.00222058	TTGCTCCTTGATTCAGCGGCGGACGGGTGAGTAATGCCTAGGAATCTGCCTGGTAGTGGGGGACAACGTTTCGAAAGGAACGCTAATACCGCATACGTCCTACGGGAGAAAGCAGGGGACCTTCGGGCCTTGCGCTATCAGATGAGCCTAGGTCGGATTAGCTTGTTGGTGAGGTAATGGCTCACCAAGGCGACGATCCGTAACTGGTCTGAGAGGATGATCAGTCACACTGGAACTGAGACACGGTCCAGACTCCTACGGGAGGCAGCAGTGGGGAATATTGGACAATGGGCGAAAGCCTGATCCAGCCATGCCGCGTGTGTGAAGAAGGTCTTCGGATTGTAAAGCACTTTAAGTTGGGAGGAAGGGTTGTAGATTAATACTCTGCAATTTTGACGT…	1351	Pseudomonadota	Gammaproteobacteria	Pseudomonadales	Pseudomonadaceae	Pseudomonas	Pseudomonas parafulva	2417	99.78	Pseudomonas parafulva	Pseudomonas	317	OTU28	OTU28	0	100	None
L1-8CT-P1-Y	MT355366	7AKAJ03	Control/Healthy Silks	L	CO325	T	27F	0	0	TGCAGTCGAGCGGTAGCACAGAGAGCTTGCTCTCGGGTGACGAGCGGCGGACGGGTGAGTAATGTCTGGGAAACTGCCTGATGGAGGGGGATAACTACTGGAAACGGTAGCTAATACCGCATAACGTCGCAAGACCAAAGTGGGGGACCTTCGGGCCTCATGCCATCAGATGTGCCCAGATGGGATTAGCTAGTAGGTGGGGTAATGGCTCACCTAGGCGACGATCCCTAGCTGGTCTGAGAGGATGACCAGCCACACTGGAACTGAGACACGGTCCAGACTCCTACGGGAGGCAGCAGTGGGGAATATTGCACAATGGGCGCAAGCCTGATGCAGCCATGCCGCGTGTATGAAGAAGGCCTTCGGGTTGTAAAGTACTTTCAGCGAGGAGGAAGGCAT…	1426	Pseudomonadota	Gammaproteobacteria	Enterobacterales	Enterobacteriaceae	Klebsiella	Klebsiella aerogenes	2546	99.72	Klebsiella aerogenes	Klebsiella	119	OTU3	OTU3	0	100	None
L1-17CB-X	MT308728	B09	Control/Healthy Silks	L	P35837	B	27F	3	0.00208623	TGCAGTCGAGCGGTAACACAGGGAGCTTGCTCCTGGGTGACGAGCGGCGGACGGGTGAGTAATGTCTGGGAAACTGCCTGATGGAGGGGGATAACTACTGGAAACGGTAGCTAATACCGCATAACGTCGCAAGACCAAAGAGGGGGACCTTCGGGCCTCTTGCCATCAGATGTGCCCAGATGGGATTAGCTAGTAGGTGGGGTAACGGCTCACCTAGGCGACGATCCCTAGCTGGTCTGAGAGGATGACCAGCCACACTGGAACTGAGACACGGTCCAGACTCCTACGGGAGGCAGCAGTGGGGAATATTGCACAATGGGCGCAAGCCTGATGCAGCCATGCCGCGTGTATGAAGAAGGCCTTCGGGTTGTAAAGTACTTTCAGCGGGGAGGAAGGTGT…	1438	Pseudomonadota	Gammaproteobacteria	Enterobacterales	Enterobacteriaceae	0	0	2519	98.89	Enterobacter ludwigii	Enterobacter	73&203	OTU3	OTU3	0	100	None
L1-4CT-C	MT308734	L21	Control/Healthy Silks	L	CO432	T	27F	1	0.000707714	CATGCAAGTCGAGCGGTAGCACAGAGAGCTTGCTCTCGGGTGACGAGCGGCGGACGGGTGAGTAATGTCTGGGAAACTGCCTGATGGAGGGGGATAACTACTGGAAACGGTAGCTAATACCGCATAACGTCGCAAGACCAAAGTGGGGGACCTTCGGGCCTCATGCCATCAGATGTGCCCAGATGGGATTAGCTAGTAGGTGGGGTAATGGCTCACCTAGGCGACGATCCCTAGCTGGTCTGAGAGGATGACCAGCCACACTGGAACTGAGACACGGTCCAGACTCCTACGGGAGGCAGCAGTGGGGAATATTGCACAATGGGCGCAAGCCTGATGCAGCCATGCCGCGTGTATGAAGAAGGCCTTCGGGTTGTAAAGTACTTTCAGCGAGGAGGAAGG…	1413	Pseudomonadota	Gammaproteobacteria	Enterobacterales	Enterobacteriaceae	Klebsiella	Klebsiella aerogenes	2526	99.65	Klebsiella aerogenes	Klebsiella	118	OTU3	OTU3	0	100	None
L1-4CT-D	MT308736	L25	Control/Healthy Silks	L	CO432	T	27F	6	0.0042523	CATGCAGTCGAGCGGTAGCACAGAGAGCTTGCNCNCGGGTGACGAGCGGCGGACGGGTGAGTAATGTCTGGGAAACTGCCTGATGGAGGGGGATAACTACTGGAAACGGTAGCTAATACCGCATAACGTCGCAAGACCAAAGTGGGGGACCTTCGGGCCTCATGCCATCAGATGTGCCCAGATGGGATTAGCTAGTAGGTGGGGTAATGGCTCACCTAGGCGACGATCCCTAGCTGGTCTGAGAGGATGACCAGCCACACTGGAACTGAGACACGGTCCAGACTCCTACGGGAGGCAGCAGTGGGGAATATTGCACAATGGGCGCAAGCCTGATGCAGCCATGCCGCGTGTATGAAGAAGGCCTTCGGGTTGTAAAGTACTTTCAGCGAGGAGGAAGGC…	1411	Pseudomonadota	Gammaproteobacteria	Enterobacterales	Enterobacteriaceae	Klebsiella	Klebsiella aerogenes	2498	99.22	Klebsiella aerogenes	Klebsiella	117&118	OTU3	OTU3	0	100	none
P1-1CB-A	OM164276	M12	Control/Healthy Silks	P	CO449	B	27F	5	0.00354108	TGCAGTCGAGCGGTAGCACANNAGAGCTTGCTCTCGGGTGACGAGCGGCGGACGGGTGAGTAATGTCTGGGAAACTGCCTGATGGAGGGGGATAACTACTGGAAACGGTAGCTAATACCGCATAACGTCGCAAGACCAAAGTGGGGGACCTTCGGGCCTCATGCCATCAGATGTGCCCAGATGGGATTAGCTAGTAGGTGGGGTAATGGCTCACCTAGGCGACGATCCCTAGCTGGTCTGAGAGGATGACCAGCCACACTGGAACTGAGACACGGTCCAGACTCCTACGGGAGGCAGCAGTGGGGAATATTGCACAATGGGCGCAAGCCTGATGCAGCCATGCCGCGTGTATGAAGAAGGCCTTCGGGTTGTAAAGTACTTTCAGCGAGGAGGAAGGCA…	1412	Pseudomonadota	Gammaproteobacteria	Enterobacterales	Enterobacteriaceae	Klebsiella	Klebsiella aerogenes	2566	99.36	Klebsiella aerogenes	Klebsiella	117&118	OTU3	OTU3	0	100	none
P1-4CT-E	MT777202	M48	Control/Healthy Silks	P	CO432	T	27F	7	0.00495751	TGCAGTCGAGCGGTAGCACAGAGAGCTTGCTCTCGGGTGACGAGCGGCGGACGGGTGAGTAATGTCTGGGAAACTGCCTGATGGAGGGGGATAACTACTGGAAACGGTAGCTAATACCGCATAACGTCGCAAGACCAAAGTGGGGGACCTTCGGGCCTCATGCCATCAGATGTGCCCAGATGGGATTAGCTAGTAGGTGGGGTAATGGCTCACCTAGGCGACGATCCCTAGCTGGTCTGAGAGGATGACCAGCCACACTGGAACTGAGACACGGTCCAGACTCCTACGGGAGGCAGCAGTGGGGAATATTGCACAATGGGCNNNAGCCTGATGCAGCCATGCCGCGTGTATGAAGAAGGCCTTCGGGTTGTAAAGTACTTTCAGCGAGGAGGAAGGCAT…	1412	Pseudomonadota	Gammaproteobacteria	Enterobacterales	Enterobacteriaceae	Klebsiella	Klebsiella aerogenes	2555	99.15	Klebsiella aerogenes	Klebsiella	117&118	OTU3	0	OTU3	100	None
P1-4CT-A	MT777204	M56	Control/Healthy Silks	P	CO432	T	27F	8	0.00569395	ATGCAGTCGAGCGGTAGCACAGAGAGCTTGCTCTCGGGTGACGAGCGGCGGACGGGTGAGTAATGTCTGGGAAACTGCCTGATGGAGGGGGATAACTACTGGAAACGGTAGCTAATACCGCATAACGTCGCAAGACCAAAGTGGGGGACCTTCGGGCCTCATGCCATCAGATGTGCCCAGATGGGATTAGCTAGTAGGTGGGGTAATGGCTCACCTAGGCGACGATCCCTAGCTGGTCTGAGAGGATGACCAGCCACACTGGAACTGAGACACGGTCCAGACTCCTACGGGAGGCAGCAGTGGGGAATATTGCACAATGGGCGCAAGCCTGATGCAGCCATGCCGCGTGTATGAAGAAGGCCTTCGGGTTGTAAAGTACTTTCAGCGAGGAGGAAGGCA…	1405	Pseudomonadota	Gammaproteobacteria	Enterobacterales	Enterobacteriaceae	Klebsiella	Klebsiella aerogenes	2538	99.15	Klebsiella aerogenes	Klebsiella	117&118	OTU3	0	OTU3	99.61	1 N mismatch
P1-4CT-F	MT777205	M57	Control/Healthy Silks	P	CO432	T	27F	4	0.00284091	CATGCAAGTCGAGCGGTAGCACAGAGAGCTTGCTCTCGGGTGACGAGCGGCGGACGGGTGAGTAATGTCTGGGAAACTGCCTGATGGAGGGGGATAACTACTGGAAACGGTAGCTAATACCGCATAACGTCGCAAGACCAAAGTGGGGGACCTTCGGGCCTCATGCCATCAGATGTGCCCAGATGGGATTAGCTAGTAGGTGGGGTAATGGCTCACCTAGGCGACGATCCCTAGCTGGTCTGAGAGGATGACCAGCCACACTGGAACTGAGACACGGTCCAGACTCCTACGGGAGGCAGCAGTGGGGAATATTGCACAATGGGCGCAAGCCTGATGCAGCCATGCCGCGTGTATGAAGAAGGCCTTCGGGTTGTAAAGTACTTTCAGCGAGGAGGAAGG…	1408	Pseudomonadota	Gammaproteobacteria	Enterobacterales	Enterobacteriaceae	Klebsiella	Klebsiella aerogenes	2566	99.5	Klebsiella aerogenes	Klebsiella	117&118	OTU3	OTU3	0	100	None
L1-4CB-I	OM164357	O68	Control/Healthy Silks	L	CO432	B	27F	4	0.00283487	CATGCAGTCGAACGGTAGCACAGAGAGCTTGCTCTCGGGTGACGAGTGGCGGACGGGTGAGTAATGTCTGGGAAACTGCCTGATGGAGGGGGATAACTACTGGAAACGGTAGCTAATACCGCATAACGTCGCAAGACCAAAGAGGGGGACCTTCGGGCCTCTTGCCATCAGATGTGCCCAGATGGGATTAGCTAGTAGGTGGGGTAATGGCTCACCTAGGCGACGATCCCTAGCTGGTCTGAGAGGATGACCAGCCACACTGGAACTGAGACACGGTCCAGACTCCTACGGGAGGCAGCAGTGGGGAATATTGCACAATGGGCGCAAGCCTGATGCAGCCATGCCGCGTGTATGAAGAAGGCCTTCGGGTTGTAAAGTACTTTCAGCGGGGAGGAAGGT…	1411	Pseudomonadota	Gammaproteobacteria	Enterobacterales	Enterobacteriaceae	Leclercia	Leclercia adecarboxylata	2516	99.5	Leclercia adecarboxylata	Leclercia	167	OTU3	OTU3	0	100	None
P1-11CB-C	MT305790	P38	Control/Healthy Silks	P	CO452	B	27F	0	0	TGCAGTCGAGCGGTAACACAGAGAGCTTGCTCTCGGGTGACGAGCGGCGGACGGGTGAGTAATGTCTGGGAAACTGCCTGATGGAGGGGGATAACTACTGGAAACGGTAGCTAATACCGCATAACGTCGCAAGACCAAAGTGGGGGACCTTCGGGCCTCATGCCATCAGATGTGCCCAGATGGGATTAGCTAGTAGGTGGGGTAATGGCTCACCTAGGCGACGATCCCTAGCTGGTCTGAGAGGATGACCAGCCACACTGGAACTGAGACACGGTCCAGACTCCTACGGGAGGCAGCAGTGGGGAATATTGCACAATGGGCGCAAGCCTGATGCAGCCATGCCGCGTGTATGAAGAAGGCCTTCGGGTTGTAAAGTACTTTCAGCGAGGAGGAAGGCAT…	1402	Pseudomonadota	Gammaproteobacteria	Enterobacterales	Enterobacteriaceae	Klebsiella	Klebsiella aerogenes	2510	99.79	Klebsiella aerogenes	Klebsiella	117	OTU3	OTU3	0	100	None
P1-4CB-A	OM164386	P59	Control/Healthy Silks	P	CO432	B	27F	15	0.010661	ATGCAGTCGAGCGGTANCACAGGGAGCTTGCTCCTGGGTGACGAGCGGCGGACGGGTGAGTAATGTCTGGGAAACTGCCTGATGGAGGGGGATAACTACTGGAAACGGTAGCTAATACCGCATAACGTCGCAAGACCAAAGAGGGGGACCTTCGGGCCTCTTGCCATCAGATGTGCCCAGATGGGATTAGCTAGTAGGTGGGGTAACGGCTCACCTAGGCGACGATCCCTAGCTGGTCTGAGAGGATGACCAGCCACACTGGAACTGAGACACGGTCCAGACTCCTACGGGAGGCAGCAGTGGGGAATATTGCACAATGGGCGCAAGCCTGATGCAGCCATGCCGCGTGTATGAAGAAGGCCTTCGGGTTGTAAAGTACTTTCAGCGGGGAGGANNGNG…	1407	Pseudomonadota	Gammaproteobacteria	Enterobacterales	Enterobacteriaceae	Enterobacter	Enterobacter asburiae	2495	98.5	Enterobacter asburiae	Enterobacter	71	OTU3	0	OTU3	99.61	1 N mismatch
P1-19CT-C	MT305791	Q27	Control/Healthy Silks	P	P9855HR	T	27F	6	0.00523104	two shorter sequences: TCGAGCGGTAGCACAGAGAGCTTGCTCTCGGGTGACGAGCGGCGGACGGGTGAGTAATGTCTGGGAAACTGCCTGATGGAGGGGGATAACTACTGGAAACGGTAGCTAATACCGCATAACGTCGCAAGACCAAAGTGGGGGACCTTCGGGCCTCATGCCATCAGATGTGCCCAGATGGGATTAGCTGGTAGGTGGGGTAACGGCTCACCTAGGCGACGATCCCTAGCTGGTCTGAGAGGATGACCAGCCACACTGGAACTGAGACACGGTCCAGACTCCTACGGGAGGCAGCAGTGGGGAATATTGCACAATGGGCGCAAGCCTGATGCAGCCATGCCGCGTGTGTGAAGAAGGCCTTCGGGTTGTAAAGCACTTT…	747&400	Pseudomonadota	Gammaproteobacteria	Enterobacterales	Enterobacteriaceae	Klebsiella	Klebsiella variicola	1365/732	99.46/99.50	Klebsiella variicola/ Klebsiella pneumoniae	Klebsiella	144	OTU3	0	OTU3	98.43	4 N mismatches
P1-19CT-F	MT777218	R09	Control/Healthy Silks	P	P9855HR	T	27F	0	0	CATGCAGTCGAGCGGTAGCACAGAGAGCTTGCTCTCGGGTGACGAGCGGCGGACGGGTGAGTAATGTCTGGGAAACTGCCTGATGGAGGGGGATAACTACTGGAAACGGTAGCTAATACCGCATAACGTCGCAAGACCAAAGTGGGGGACCTTCGGGCCTCATGCCATCAGATGTGCCCAGATGGGATTAGCTGGTAGGTGGGGTAACGGCTCACCTAGGCGACGATCCCTAGCTGGTCTGAGAGGATGACCAGCCACACTGGAACTGAGACACGGTCCAGACTCCTACGGGAGGCAGCAGTGGGGAATATTGCACAATGGGCGCAAGCCTGATGCAGCCATGCCGCGTGTGTGAAGAAGGCCTTCGGGTTGTAAAGCACTTTCAGCGGGGAGGAAGGC…	1407	Pseudomonadota	Gammaproteobacteria	Enterobacterales	Enterobacteriaceae	Klebsiella	Klebsiella variicola	2593	99.93	Klebsiella variicola	Klebsiella	144	OTU3	OTU3	0	100	None
P1-17CT-A	OM240984	R16	Control/Healthy Silks	P	P35837	T	27F	15	0.0179856	TGCAGTCGAGCGGTAACACAGGGAGCTTGCTCCTGGGTGACGAGCGGCGGACGGGTGAGTAATGTCTGGGAAACTGCCTGATGGAGGGGGATAACTACTGGAAACGGTAGCTAATACCGCATAACGTCGCAAGACCAAAGAGGGGGACCTTCGGGCCTCTTGCCATCAGATGTGCCCAGATGGGATTAGCTAGTAGGTGGGGTAACGGCTCACCTAGGCGACGATCCCTAGCTGGTCTGAGAGGATGACCAGCCACACTGGAACTGAGACACGGTCCAGACTCCTACGGGAGGCAGCAGTGGGGAATATTGCACAATGGGCGCAAGCCTGATGCAGCCATGCCGCGTGTATGAAGAAGGCCTTCGGGTTGTAAAGTACTTTCAGCGGGGAGGAAGGTGT…	834	Pseudomonadota	Gammaproteobacteria	Enterobacterales	Enterobacteriaceae	0	0	1418	97.47	Enterobacter asburiae	Enterobacter	73&203	OTU3	0	OTU3	97.24	7 N mismatches
L1-12CT-F	MT777224	R69	Control/Healthy Silks	L	CO448	T	27F	1	0.000714286	AGTCGAGCGGTAGCACAGAGAGCTTGCTCTCGGGTGACGAGCGGCGGACGGGTGAGTAATGTCTGGGAAACTGCCTGATGGAGGGGGATAACTACTGGAAACGGTAGCTAATACCGCATAACGTCGCAAGACCAAAGTGGGGGACCTTCGGGCCTCATGCCATCAGATGTGCCCAGATGGGATTAGCTGGTAGGTGGGGTAACGGCTCACCTAGGCGACGATCCCTAGCTGGTCTGAGAGGATGACCAGCCACACTGGAACTGAGACACGGTCCAGACTCCTACGGGAGGCAGCAGTGGGGAATATTGCACAATGGGCGCAAGCCTGATGCAGCCATGCCGCGTGTGTGAAGAAGGCCTTCGGGTTGTAAAGCACTTTCAGCGGGGAGGAAGGCGGTGA…	1400	Pseudomonadota	Gammaproteobacteria	Enterobacterales	Enterobacteriaceae	Klebsiella	Klebsiella variicola	2522	99.93	Klebsiella variicola	Klebsiella	144	OTU3	OTU3	0	100	None
L1-1CT-G	OM164444	R70	Control/Healthy Silks	L	CO449	T	27F	0	0	TGCAAGTCGAACGGTAGCACAGAGAGCTTGCTCTTGGGTGACGAGTGGCGGACGGGTGAGTAATGTCTGGGAAACTGCCCGATGGAGGGGGATAACTACTGGAAACGGTAGCTAATACCGCATAACGTCTTCGGACCAAAGTGGGGGACCTTCGGGCCTCACACCATCGGATGTGCCCAGATGGGATTAGCTAGTAGGTGGGGTAACGGCTCACCTAGGCGACGATCCCTAGCTGGTCTGAGAGGATGACCAGCCACACTGGAACTGAGACACGGTCCAGACTCCTACGGGAGGCAGCAGTGGGGAATATTGCACAATGGGCGCAAGCCTGATGCAGCCATGCCGCGTGTATGAAGAAGGCCTTCGGGTTGTAAAGTACTTTCAGTGGGGAGGAAGGCG…	1405	Pseudomonadota	Gammaproteobacteria	Enterobacterales	Erwiniaceae	Erwinia	Erwinia aphidicola	2535	100	Erwinia aphidicola	Erwinia	92	OTU3	OTU3	0	100	None
P1-12CT-C	MT777226	S39	Control/Healthy Silks	P	CO448	T	27F	1	0.000712758	TGCAAGTCGAACGGTAGCACAGAGAGCTTGCTCTCGGGTGACGAGTGGCGGACGGGTGAGTAATGTCTGGGAAACTGCCTGATGGAGGGGGATAACTACTGGAAACGGTAGCTAATACCGCATAACGTCGCAAGACCAAAGAGGGGGACCTTCGGGCCTCTTGCCATCAGATGTGCCCAGATGGGATTAGCTAGTAGGTGGGGTAATGGCTCACCTAGGCGACGATCCCTAGCTGGTCTGAGAGGATGACCAGCCACACTGGAACTGAGACACGGTCCAGACTCCTACGGGAGGCAGCAGTGGGGAATATTGCACAATGGGCGCAAGCCTGATGCAGCCATGCCGCGTGTATGAAGAAGGCCTTCGGGTTGTAAAGTACTTTCAGCGGGGAGGAAGGTG…	1403	Pseudomonadota	Gammaproteobacteria	Enterobacterales	Enterobacteriaceae	0	0	2567	99.71	Leclercia adecarboxylata	Leclercia	167	OTU3	OTU3	0	100	None
P1-12CT-D	MT308749	T23	Control/Healthy Silks	P	CO448	T	27F	6	0.00434153	AACGGTAGCACAGAGAGCTTGCTCTCGGGTGACGANTNNNNGGACGGGTGAGTAATGTCTGGGAAACTGCCTGATGGAGGGGGATAACTACTGGAAACGGTAGCTAATACCGCATAACGTCGCAAGACCAAAGAGGGGGACCTTCGGGCCTCTTGCCATCAGATGTGCCCAGATGGGATTAGCTAGTAGGTGGGGTAATGGCTCACCTAGGCGACGATCCCTAGCTGGTCTGAGAGGATGACCAGCCACACTGGAACTGAGACACGGTCCAGACTCCTACGGGAGGCAGCAGTGGGGAATATTGCACAATGGGCGCAAGCCTGATGCAGCCATGCCGCGTGTATGAAGAAGGCCTTCGGGTTGTAAAGTACTTTCAGCGGGGAGGAAGGTGTTGTGGTT…	1382	Pseudomonadota	Gammaproteobacteria	Enterobacterales	Enterobacteriaceae	Leclercia	Leclercia adecarboxylata	2508	99.35	Leclercia adecarboxylata	Leclercia	167	OTU3	OTU3	0	100	None
P1-17ET-P1V	OM241025	J18	Experimental/Fg-treated Silks	P	P35837	T	27F	4	0.0041841	TGGTAGCGCCCTCCCGAAGGTTAAGCTACCTACTTCTTTTGCAACCCACTCCCATGGTGTGACGGGCGGTGTGTACAAGGCCCGGGAACGTATTCACCGTAGCATTCTGATCTACGATTACTAGCGATTCCGACTTCATGGAGTCGAGTTGCAGACTCCAATCCGGACTACGACGCACTTTATGAGGTCCGCTTGCTCTCGCGAGGTCGCTTCTCTTTGTATGCGCCATTGTAGCACGTGTGTAGCCCTACTCGTAAGGGCCATGATGACTTGACGTCATCCCCACCTTCCTCCAGTTTATCACTGGCAGTCTCCTTTGAGTTCCCGGCCGAACCGCTGGCAACAAAGGATAAGGGTTGCGCTCGTTGCGGGACTTAACCCAACATTTCACAACACGAG…	956	Pseudomonadota	Gammaproteobacteria	Enterobacterales	Enterobacteriaceae	0	0	1695	99.27	Enterobacter mori	Enterobacter	80	OTU3	0	OTU3	98.82	3 N mismatches
P1-2ET-C	MT355367	L01	Experimental/Fg-treated Silks	P	CO441	T	27F	1	0.000711744	TGCAGTCGAGCGGTAGCACAGAGAGCTTGCTCTCGGGTGACGAGCGGCGGACGGGTGAGTAATGTCTGGGAAACTGCCTGATGGAGGGGGATAACTACTGGAAACGGTAGCTAATACCGCATAACGTCGCAAGACCAAAGTGGGGGACCTTCGGGCCTCATGCCATCAGATGTGCCCAGATGGGATTAGCTGGTAGGTGGGGTAACGGCTCACCTAGGCGACGATCCCTAGCTGGTCTGAGAGGATGACCAGCCACACTGGAACTGAGACACGGTCCAGACTCCTACGGGAGGCAGCAGTGGGGAATATTGCACAATGGGCGCAAGCCTGATGCAGCCATGCCGCGTGTGTGAAGAAGGCCTTCGGGTTGTAAAGCACTTTCAGCGGGGAGGAAGGCGG…	1405	Pseudomonadota	Gammaproteobacteria	Enterobacterales	Enterobacteriaceae	Klebsiella	Klebsiella variicola	2521	99.86	Klebsiella variicola	Klebsiella	142&143	OTU3	OTU3	0	100	none
L1-11ET-A	MT355368	L07	Experimental/Fg-treated Silks	L	CO452	T	27F	3	0.00212917	TGCAGTCGAGCGGTAGCACAGAGAGCTTGCTCTCGGGTGACGAGCGGCGGACGGGTGAGTAATGTCTGGGAAACTGCCTGATGGAGGGGGATAACTACTGGAAACGGTAGCTAATACCGCATAACGTCGCAAGACCAAAGTGGGGGACCTTCGGGCCTCATGCCATCAGATGTGCCCAGATGGGATTAGCTAGTAGGTGGGGTAATGGCTCACCTAGGCGACGATCCCTAGCTGGTCTGAGAGGATGACCAGCCACACTGGAACTGAGACACGGTCCAGACTCCTACGGGAGGCAGCAGTGGGGAATATTGCACAATGGGCGCAAGCCTGATGCAGCCATGCCGCGTGTATGAAGAAGGCCTTCGGGTTGTAAAGTACTTTCAGCGAGGAGGAAGGCAT…	1409	Pseudomonadota	Gammaproteobacteria	Enterobacterales	Enterobacteriaceae	Klebsiella	Klebsiella aerogenes	2507	99.5	Klebsiella aerogenes	Klebsiella	118&405	OTU3	OTU3	0	100	none
L1-2EB-E	MT355369	L08	Experimental/Fg-treated Silks	L	CO441	B	27F	1	0.000712758	TGCAGTCGAGCGGTAGCACAGAGAGCTTGCTCTCGGGTGACGAGCGGCGGACGGGTGAGTAATGTCTGGGAAACTGCCTGATGGAGGGGGATAACTACTGGAAACGGTAGCTAATACCGCATAACGTCGCAAGACCAAAGTGGGGGACCTTCGGGCCTCATGCCATCAGATGTGCCCAGATGGGATTAGCTAGTAGGTGGGGTAATGGCTCACCTAGGCGACGATCCCTAGCTGGTCTGAGAGGATGACCAGCCACACTGGAACTGAGACACGGTCCAGACTCCTACGGGAGGCAGCAGTGGGGAATATTGCACAATGGGCGCAAGCCTGATGCAGCCATGCCGCGTGTATGAAGAAGGCCTTCGGGTTGTAAAGTACTTTCAGCGAGGAGGAAGGCAT…	1403	Pseudomonadota	Gammaproteobacteria	Enterobacterales	Enterobacteriaceae	Klebsiella	Klebsiella aerogenes	2509	99.71	Klebsiella aerogenes	Klebsiella	118	OTU3	OTU3	0	100	none
L1-3ET-G	MT355370	L11	Experimental/Fg-treated Silks	L	CO433	T	27F	0	0	GTCGAGCGGTAGCACAGAGAGCTTGCTCTCGGGTGACGAGCGGCGGACGGGTGAGTAATGTCTGGGAAACTGCCTGATGGAGGGGGATAACTACTGGAAACGGTAGCTAATACCGCATAACGTCGCAAGACCAAAGTGGGGGACCTTCGGGCCTCATGCCATCAGATGTGCCCAGATGGGATTAGCTAGTAGGTGGGGTAATGGCTCACCTAGGCGACGATCCCTAGCTGGTCTGAGAGGATGACCAGCCACACTGGAACTGAGACACGGTCCAGACTCCTACGGGAGGCAGCAGTGGGGAATATTGCACAATGGGCGCAAGCCTGATGCAGCCATGCCGCGTGTATGAAGAAGGCCTTCGGGTTGTAAAGTACTTTCAGCGAGGAGGAAGGCATTAAG…	1384	Pseudomonadota	Gammaproteobacteria	Enterobacterales	Enterobacteriaceae	Klebsiella	Klebsiella aerogenes	2484	99.78	Klebsiella aerogenes	Klebsiella	118	OTU3	OTU3	0	100	none
L1-3ET-H	MT308731	L13	Experimental/Fg-treated Silks	L	CO433	T	27F	1	0.00073046	TGCAGTCGAGCGGTAGCACAGAGAGCTTGCNCTCGGGTGACGAGCGGCGGACGGGTGAGTAATGTCTGGGAAACTGCCTGATGGAGGGGGATAACTACTGGAAACGGTAGCTAATACCGCATAACGTCGCAAGACCAAAGTGGGGGACCTTCGGGCCTCATGCCATCAGATGTGCCCAGATGGGATTAGCTAGTAGGTGGGGTAATGGCTCACCTAGGCGACGATCCCTAGCTGGTCTGAGAGGATGACCAGCCACACTGGAACTGAGACACGGTCCAGACTCCTACGGGAGGCAGCAGTGGGGAATATTGCACAATGGGCGCAAGCCTGATGCAGCCATGCCGCGTGTATGAAGAAGGCCTTCGGGTTGTAAAGTACTTTCAGCGAGGAGGAAGGCAT…	1369	Pseudomonadota	Gammaproteobacteria	Enterobacterales	Enterobacteriaceae	Klebsiella	Klebsiella aerogenes	2448	99.71	Klebsiella aerogenes	Klebsiella	118	OTU3	OTU3	0	100	none
P1-11ET-G	MT355371	L15	Experimental/Fg-treated Silks	P	CO452	T	27F	0	0	CATGCAGTCGAGCGGTAGCACAGAGAGCTTGCTCTCGGGTGACGAGCGGCGGACGGGTGAGTAATGTCTGGGAAACTGCCTGATGGAGGGGGATAACTACTGGAAACGGTAGCTAATACCGCATAACGTCGCAAGACCAAAGTGGGGGACCTTCGGGCCTCATGCCATCAGATGTGCCCAGATGGGATTAGCTGGTAGGTGGGGTAACGGCTCACCTAGGCGACGATCCCTAGCTGGTCTGAGAGGATGACCAGCCACACTGGAACTGAGACACGGTCCAGACTCCTACGGGAGGCAGCAGTGGGGAATATTGCACAATGGGCGCAAGCCTGATGCAGCCATGCCGCGTGTGTGAAGAAGGCCTTCGGGTTGTAAAGCACTTTCAGCGGGGAGGAAGGC…	1408	Pseudomonadota	Gammaproteobacteria	Enterobacterales	Enterobacteriaceae	Klebsiella	Klebsiella variicola	2500	99.43	Klebsiella variicola	Klebsiella	141	OTU3	OTU3	0	100	none
P1-3ET-Q	MT308732	L17	Experimental/Fg-treated Silks	P	CO433	T	27F	2	0.00141945	TGCAGTCGAGCGGTAACACAGGGAGCTTGCTCCTGGGTGACGAGCGGCGGACGGGTGAGTAATGTCTGGGAAACTGCCTGATGGAGGGGGATAACTACTGGAAACGGTAGCTAATACCGCATAACGTCGCAAGACCAAAGAGGGGGACCTTCGGGCCTCTTGCCATCAGATGTGCCCAGATGGGATTAGCTAGTAGGTGGGGTAACGGCTCACCTAGGCGACGATCCCTAGCTGGTCTGAGAGGATGACCAGCCACACTGGAACTGAGACACGGTCCAGACTCCTACGGGAGGCAGCAGTGGGGAATATTGCACAATGGGCGCAAGCCTGATGCAGCCATGCCGCGTGTATGAAGAAGGCCTTCGGGTTGTAAAGTACTTTCAGCGGGGAGGAAGGTGT…	1409	Pseudomonadota	Gammaproteobacteria	Enterobacterales	Enterobacteriaceae	Enterobacter	Enterobacter asburiae	2478	99.35	Enterobacter asburiae	Enterobacter	73	OTU3	OTU3	0	100	none
P1-2ET-B	MT308733	L20	Experimental/Fg-treated Silks	P	CO441	T	27F	0	0	TGCAGTCGAGCGGTAGCACAGAGAGCTTGCTCTCGGGTGACGAGCGGCGGACGGGTGAGTAATGTCTGGGAAACTGCCTGATGGAGGGGGATAACTACTGGAAACGGTAGCTAATACCGCATAACGTCGCAAGACCAAAGTGGGGGACCTTCGGGCCTCTTGCCATCAGATGTGCCCAGATGGGATTAGCTAGTAGGTGGGGTAATGGCTCACCTAGGCGACGATCCCTAGCTGGTCTGAGAGGATGACCAGCCACACTGGAACTGAGACACGGTCCAGACTCCTACGGGAGGCAGCAGTGGGGAATATTGCACAATGGGCGCAAGCCTGATGCAGCCATGCCGCGTGTATGAAGAAGGCCTTCGGGTTGTAAAGTACTTTCAGCGAGGAGGAAGGCGT…	1403	Pseudomonadota	Gammaproteobacteria	Enterobacterales	Enterobacteriaceae	Klebsiella	Klebsiella aerogenes	2513	99.79	Klebsiella aerogenes	Klebsiella	122	OTU3	OTU3	0	100	none
L1-11ET-L	MT355372	L22	Experimental/Fg-treated Silks	L	CO452	T	27F	0	0	TGCAGTCGAGCGGTAGCACAGAGAGCTTGCTCTCGGGTGACGAGCGGCGGACGGGTGAGTAATGTCTGGGAAACTGCCTGATGGAGGGGGATAACTACTGGAAACGGTAGCTAATACCGCATAACGTCGCAAGACCAAAGTGGGGGACCTTCGGGCCTCATGCCATCAGATGTGCCCAGATGGGATTAGCTAGTAGGTGGGGTAATGGCTCACCTAGGCGACGATCCCTAGCTGGTCTGAGAGGATGACCAGCCACACTGGAACTGAGACACGGTCCAGACTCCTACGGGAGGCAGCAGTGGGGAATATTGCACAATGGGCGCAAGCCTGATGCAGCCATGCCGCGTGTATGAAGAAGGCCTTCGGGTTGTAAAGTACTTTCAGCGAGGAGGAAGGCAT…	1404	Pseudomonadota	Gammaproteobacteria	Enterobacterales	Enterobacteriaceae	Klebsiella	Klebsiella aerogenes	2515	99.79	Klebsiella aerogenes	Klebsiella	118	OTU3	OTU3	0	100	None
L1-2EB-A	MT308735	L23	Experimental/Fg-treated Silks	L	CO441	B	27F	2	0.00141743	CATGCAGTCGAGCGGTAGCACAGAGAGCTTGCTCTCGGGTGACGAGCGGCGGACGGGTGAGTAATGTCTGGGAAACTGCCTGATGGAGGGGGATAACTACTGGAAACGGTAGCTAATACCGCATAACGTCGCAAGACCAAAGTGGGGGACCTTCGGGCCTCATGCCATCAGATGTGCCCAGATGGGATTAGCTGGTAGGTGGGGTAACGGCTCACCTAGGCGACGATCCCTAGCTGGTCTGAGAGGATGACCAGCCACACTGGAACTGAGACACGGTCCAGACTCCTACGGGAGGCAGCAGTGGGGAATATTGCACAATGGGCGCAAGCCTGATGCAGCCATGCCGCGTGTGTGAAGAAGGCCTTCGGGTTGTAAAGCACTTTCAGCGGGGAGGAAGGC…	1411	Pseudomonadota	Gammaproteobacteria	Enterobacterales	Enterobacteriaceae	Klebsiella	Klebsiella variicola	2516	99.64	Klebsiella variicola	Klebsiella	143	OTU3	OTU3	0	100	none
P1-3ET-E	OM164266	L49	Experimental/Fg-treated Silks	P	CO433	T	27F	0	0	ATGCAGTCGAGCGGTAGCACAGAGAGCTTGCTCTCGGGTGACGAGCGGCGGACGGGTGAGTAATGTCTGGGAAACTGCCTGATGGAGGGGGATAACTACTGGAAACGGTAGCTAATACCGCATAACGTCGCAAGACCAAAGTGGGGGACCTTCGGGCCTCATGCCATCAGATGTGCCCAGATGGGATTAGCTAGTAGGTGGGGTAACGGCTCACCTAGGCGACGATCCCTAGCTGGTCTGAGAGGATGACCAGCCACACTGGAACTGAGACACGGTCCAGACTCCTACGGGAGGCAGCAGTGGGGAATATTGCACAATGGGCGCAAGCCTGATGCAGCCATGCCGCGTGTGTGAAGAAGGCCTTCGGGTTGTAAAGCACTTTCAGCGGGGAGGAAGGCG…	1406	Pseudomonadota	Gammaproteobacteria	Enterobacterales	Enterobacteriaceae	Klebsiella	0	2582	99.79	Klebsiella pneumoniae	Klebsiella	146	OTU3	0	OTU3	100	None
P1-11ET-D	MT777184	M08	Experimental/Fg-treated Silks	P	CO452	T	27F	13	0.00925926	ATGCAGTCGAGCGGTAGCACAGAGAGCTTGCTCTCGGGTGACGAGCGGCGGACGGGTGAGTAATGTCTGGGAAACTGCCTGATGGAGGGGGATAACTACTGGAAACGGTAGCTAATACCGCATAACGTCGCAAGACCAAAGTGGGGGACCTTCGGGCCTCATGCCATCAGATGTGCCCAGATGGGATTAGCTAGTAGGTGGGGTAATGGCTCACCTAGGCGACGATCCCTAGCTGGTCTGAGAGGATGACCAGCCACACTGGAACTGAGACACGGTCCAGACTCCTACGGGAGGCAGCAGTGGGGAATATTGCACAATGGGCGCAAGCCTGATGCAGCCATGCCGCGTGTATGAAGAAGGCCTTCGGGTTGTAAAGTACTTTCAGCGAGGAGGAAGGCA…	1404	Pseudomonadota	Gammaproteobacteria	Enterobacterales	Enterobacteriaceae	Klebsiella	Klebsiella aerogenes	2518	98.72	Klebsiella aerogenes	Klebsiella	118&405	OTU3	0	OTU3	99.61	1 N mismatch
P1-3ET-G	OM302484	M09	Experimental/Fg-treated Silks	P	CO433	T	27F	18	0.0149875	two shorter sequences: AAGAGCTTGCTCTCGGGTGACGAGCGGCGGACGGGTGAGTAATGTCTGGGAAACTGCCNGATGGAGGGGGATAACTACTGGAAACGGTAGCTAATACCGCATAACGTCGCAAGACCAAAGTGGGGGACCTTCGGGCCTCATGCCATCAGATGTGCCCAGATGGGATTAGCTAGTAGGTGGGGTAATGGCTCACCTAGGCGACGATCCCTAGCTGGTCTGAGAGGATGACCAGCCACACTGGAACTGAGACACGGTCCAGACTCCTACGGGAGGCAGCAGTGGGGAATATTGCACAATGGGCGCAAGCCTGATGCAGCCATGCCGCGTGTATGAAGAAGGCCTTCGGGTTGTAAAGTACTTTCAGCGAGGAGGAAGG…	773&428	Pseudomonadota	Gammaproteobacteria	Enterobacterales	Enterobacteriaceae	Klebsiella	Klebsiella aerogenes	1382/730	98.58/96.73	Klebsiella aerogenes// Kluyvera cryocrescens	Klebsiella	120	OTU3	0	OTU3	98.42	4 N mismatches
P1-11ET-C	OM241083	M13	Experimental/Fg-treated Silks	P	CO452	T	27F	11	0.0114345	GTGGTAGCGCCCTCCCGAAGGNTAAGCTACCTACTTCTTTTGCAACCCACTCCCATGGTGTGACGGGCGGTGTGTACAAGGCCCGGGAACGTATTCACCGTAGCATTCTGATCTACGATTACTAGCGATTCCGACTTCATGGAGTCGAGTTGCAGACTCCAATCCGGACTACGACATACTTTATGAGGTCCGCTTGCTCTCGCGAGGTCGCTTCTCTTTGTATATGCCATTGTAGCACGTGTGTAGCCCTACTCGTAAGGGCCATGATGACTTGACGTCATCCCCACCTTCCTCCAGTTTATCACTGGCAGTCTCCTTTGAGTTCCCGGCCGGNNCGCTGGCAACAAAGGATAAGGGTTGCGCTCGTTGCGGGACTTAACCCAACATTTCACAACACGA…	962	Pseudomonadota	Gammaproteobacteria	Enterobacterales	Enterobacteriaceae	0	0	1727	98.65	Klebsiella aerogenes	Klebsiella	117&118&121&122&124	OTU3	0	OTU3	96.85	7 N mismatches, 1 non-N mismatch (space)
P1-11ET-B	MT777195	M14	Experimental/Fg-treated Silks	P	CO452	T	27F	4	0.00294334	AAGAGCTTGCTCTCGGGTGACGAGCGGCGGACGGGTGAGTAATGTCTGGGAAACTGCCTGATGGAGGGGGATAACTACTGGAAACGGTAGCTAATACCGCATAACGTCGCAAGACCAAAGTGGGGGACCTTCGGGCCTCATGCCATCAGATGTGCCCAGATGGGATTAGCTAGTAGGTGGGGTAATGGCTCACCTAGGCGACGATCCCTAGCTGGTCTGAGAGGATGACCAGCCACACTGGAACTGAGACACGGTCCAGACTCCTACGGGAGGCAGCAGTGGGGAATATTGCACAATGGGCGCAAGCCTGATGCAGCCATGCCGCGTGTATGAAGAAGGCCTTCGGGTTGTAAAGTACTTTCAGCGAGGAGGAAGGCATTAAGGTTAATAACCTTGGTG…	1359	Pseudomonadota	Gammaproteobacteria	Enterobacterales	Enterobacteriaceae	Klebsiella	Klebsiella aerogenes	2483	99.56	Klebsiella aerogenes	Klebsiella	117&118	OTU3	OTU3	0	100	none
P1-3ET-N	OM164277	M16	Experimental/Fg-treated Silks	P	CO433	T	27F	10	0.00763942	CACANAAGAGCTTGCTCTCGGGTGACGAGCGGCGGACGGGTGAGTAATGTCTGGGAAACNGCCTGATGGAGGGGGATAACTACTGGAAACGGTAGCTAATACCGCATAACGTCGCAAGACCAAAGTGGGGGACCTTCGGGCCTCATGCCATCAGATGTGCCCAGATGGGATTAGCTAGTAGGTGGGGTAATGGCTCACCTAGGCGACGATCCCTAGCTGGTCTGAGAGGATGACCAGCCACACTGGAACTGAGACACGGTCCAGACTCCTACGGGAGGCAGCAGTGGGGAATATTGCACAATGGGCGCAAGCCTGATGCAGCCATGCCGCGTGTATGAAGAAGGCCTTCGGGTTGTAAAGTACTTTCAGCGAGGAGGAAGGCATTAAGGTTAATAACCT…	1309	Pseudomonadota	Gammaproteobacteria	Enterobacterales	Enterobacteriaceae	Klebsiella	Klebsiella aerogenes	2357	99.08	Klebsiella aerogenes	Klebsiella	117&118	OTU3	0	OTU3	98.03	5 N mismatches
P1-12ET-F	MT777197	M17	Experimental/Fg-treated Silks	P	CO448	T	27F	1	0.000707714	ATGCAGTCGAGCGGTAGCACAGAGAGCTTGCTCTCGGGTGACGAGCGGCGGACGGGTGAGTAATGTCTGGGAAACTGCCTGATGGAGGGGGATAACTACTGGAAACGGTAGCTAATACCGCATAACGTCGCAAGACCAAAGTGGGGGACCTTCGGGCCTCATGCCATCAGATGTGCCCAGATGGGATTAGCTAGTAGGTGGGGTAATGGCTCACCTAGGCGACGATCCCTAGCTGGTCTGAGAGGATGACCAGCCACACTGGAACTGAGACACGGTCCAGACTCCTACGGGAGGCAGCAGTGGGGAATATTGCACAATGGGCGCAAGCCTGATGCAGCCATGCCGCGTGTATGAAGAAGGCCTTCGGGTTGTAAAGTACTTTCAGCGAGGAGGAAGGCA…	1413	Pseudomonadota	Gammaproteobacteria	Enterobacterales	Enterobacteriaceae	Klebsiella	Klebsiella aerogenes	2580	99.58	Klebsiella aerogenes	Klebsiella	124	OTU3	OTU3	0	100	none
P1-2ET-P	OM240970	M20	Experimental/Fg-treated Silks	P	CO441	T	27F	22	0.0156472	TTGGCACGACCNCTTCGAGCCGGAAGCTGGTCAAACTCGGTCATTTAGAGGAAGTAAAAGTCGTAACAAGGTANNNNNNNGATGGAGGGGGATAACTACTGGAAACGGTAGCTAATACCGCATAACGTCGCAAGACCAAAGTGGGGGACCTTCGGGCCTCATGCCATCAGATGTGCCCAGATGGGATTAGCTAGTAGGTGGGGTAATGGCTCACCTAGGCGACGATCCCTAGCTGGTCTGAGAGGATGACCAGCCACACTGGAACTGAGACACGGTCCAGACTCCTACGGGAGGCAGCAGTGGGGAATATTGCACAATGGGCGCAAGCCTGATGCAGCCATGCCGCGTGTATGAAGAAGGCCTTCGGGTTGTAAAGTACTTTCAGCGAGGAGGAAGGCA…	1406	Pseudomonadota	Gammaproteobacteria	Enterobacterales	Enterobacteriaceae	0	0	2219	99.44	Klebsiella aerogenes	Klebsiella	117&118	OTU3	OTU3	0	100	None
L1-1EB-B	OM164326	O13	Experimental/Fg-treated Silks	L	CO449	B	27F	6	0.00426743	TGCAGTCGAGCGGTAGCACAGGAGAGCTTGCTCTCCGGGTGACGAGCGGCGGACGGGTGAGTAATGTCTGGGAAACTGCCTGATGGAGGGGGATAACTACTGGAAACGGTAGCTAATACCGCATAACGTCGCAAGACCAAAGAGGGGGACCTTCGGGCCTCTTGCCATCAGATGTGCCCAGATGGGATTAGCTAGTAGGTGGGGTAACGGCTCACCTAGGCGACGATCCCTAGCTGGTCTGAGAGGATGACCAGCCACACTGGAACTGAGACACGGTCCAGACTCCTACGGGAGGCAGCAGTGGGGAATATTGCACAATGGGCGCAAGCCTGATGCAGCCATGCCGCGTGTATGAAGAAGGCCTTCGGGTTGTAAAGTACTTTCAGCGGGGAGGAAGGT…	1406	Pseudomonadota	Gammaproteobacteria	Enterobacterales	Erwiniaceae	0	0	2470	99.07	Pantoea agglomerans	Pantoea	202&205	OTU3	OTU3	0	100	None
P1-1EB-C	OM164341	O34	Experimental/Fg-treated Silks	P	CO449	B	27F	4	0.00284698	TGCAGTCGAGCGGTAGCACAGGAGAGCTTGCTCTCCGGGTGACGAGCGGCGGACGGGTGAGTAATGTCTGGGAAACTGCCTGATGGAGGGGGATAACTACTGGAAACGGTAGCTAATACCGCATAACGTCGCAAGACCAAAGAGGGGGACCTTCGGGCCTCTTGCCATCAGATGTGCCCAGATGGGATTAGCTAGTAGGTGGGGTAACGGCTCACCTAGGCGACGATCCCTAGCTGGTCTGAGAGGATGACCAGCCACACTGGAACTGAGACACGGTCCAGACTCCTACGGGAGGCAGCAGTGGGGAATATTGCACAATGGGCGCAAGCCTGATGCAGCCATGCCGCGTGTATGAAGAAGGCCTTCGGGTTGTAAAGTACTTTCAGCGGGGAGGAAGGT…	1405	Pseudomonadota	Gammaproteobacteria	Enterobacterales	Erwiniaceae	0	0	2471	99.14	Pantoea agglomerans	Pantoea	202	OTU3	OTU3	0	100	None
P1-6EB-I	OM164374	P32	Experimental/Fg-treated Silks	P	CO430	B	27F	1	0.000714286	TCGAGCGGTAGCACAGAGAGCTTGCTCTCGGGTGACGAGCGGCGGACGGGTGAGTAATGTCTGGGAAACTGCCTGATGGAGGGGGATAACTACTGGAAACGGTAGCTAATACCGCATAACGTCGCAAGACCAAAGTGGGGGACCTTCGGGCCTCATGCCATCAGATGTGCCCAGATGGGATTAGCTAGTAGGTGGGGTAATGGCTCACCTAGGCGACGATCCCTAGCTGGTCTGAGAGGATGACCAGCCACACTGGAACTGAGACACGGTCCAGACTCCTACGGGAGGCAGCAGTGGGGAATATTGCACAATGGGCGCAAGCCTGATGCAGCCATGCCGCGTGTATGAAGAAGGCCTTCGGGTTGTAAAGTACTTTCAGCGAGGAGGAAGGCATTAAGG…	1400	Pseudomonadota	Gammaproteobacteria	Enterobacterales	Enterobacteriaceae	Klebsiella	Klebsiella aerogenes	2566	99.71	Klebsiella aerogenes	Klebsiella	123	OTU3	OTU3	0	100	None
P1-6EB-G	OM164383	P53	Experimental/Fg-treated Silks	P	CO430	B	27F	1	0.000711238	TGCAAGTCGAACGGTAGCACAGAGAGCTTGCTCTCGGGTGACGAGTGGCGGACGGGTGAGTAATGTCTGGGAAACTGCCTGATGGAGGGGGATAACTACTGGAAACGGTAGCTAATACCGCATAACGTCGCAAGACCAAAGAGGGGGACCTTCGGGCCTCTTGCCATCAGATGTGCCCAGATGGGATTAGCTAGTAGGTGGGGTAANGGCTCACCTAGGCGACGATCCCTAGCTGGTCTGAGAGGATGACCAGCCACACTGGAACTGAGACACGGTCCAGACTCCTACGGGAGGCAGCAGTGGGGAATATTGCACAATGGGCGCAAGCCTGATGCAGCCATGCCGCGTGTATGAAGAAGGCCTTCGGGTTGTAAAGTACTTTCAGCGGGGAGGAAGGTG…	1406	Pseudomonadota	Gammaproteobacteria	Enterobacterales	Enterobacteriaceae	0	0	2588	99.86	Enterobacter ludwigii	Enterobacter	76	OTU3	OTU3	0	100	None
L1-4ET-J	OM164390	P66	Experimental/Fg-treated Silks	L	CO432	T	27F	9	0.00649819	TGCAGTCGAACGGTAGCACAGAGAGCTTGCTCTCGGGTGACGAGTGGCGGACGGGTGAGTAATGTCTGGGAAACTGCCTGATGGAGGGGGATAACTACTGGAAACGGTAGCTAATACCGCATAACGTCGCAAGACCAAAGAGGGGGACCTTCGGGCCTCTTGCCATCAGATGTGCCCAGATGGGATTAGCTAGTAGGTGGGGTAACGGCTCACCTAGGCGACGATCCCTAGCTGGTCTGAGAGGATGACCAGCCACACTGGAACTGAGACACGGTCCAGACTCCTACGGGAGGCAGCAGTGGGGAATATTGCACAATGGGCGCAAGCCTGATGCAGCCATGCCGCGTGTATGAAGAAGGCCTTCGGGTTGTAAAGTACTTTCAGCGGGGAGGAAGGTGT…	1385	Pseudomonadota	Gammaproteobacteria	Enterobacterales	Erwiniaceae	0	0	2443	99.13	Pantoea agglomerans	Pantoea	201	OTU3	0	OTU3	99.21	2 N mismatches
L1-6ET-E	MT777209	Q03	Experimental/Fg-treated Silks	L	CO430	T	27F	1	0.000724113	ATGCAGTCGAGCGGTAGCACAGAGAGCTTGCTCTCGGGTGACGAGCGGCGGACGGGTGAGTAATGTCTGGGAAACTGCCTGATGGAGGGGGATAACTACTGGAAACGGTAGCTAATACCGCATAACGTCGCAAGACCAAAGTGGGGGACCTTCGGGCCTCATGCCATCAGATGTGCCCAGATGGGATTAGCTAGTAGGTGGGGTAATGGCTCACCTAGGCGACGATCCCTAGCTGGTCTGAGAGGATGACCAGCCACACTGGAACTGAGACACGGTCCAGACTCCTACGGGAGGCAGCAGTGGGGAATATTGCACAATGGGCGCAAGCCTGATGCAGCCATGCCGCGTGTATGAAGAAGGCCTTCGGGTTGTAAAGTACTTTCAGCGAGGAGGAAGGCN…	1381	Pseudomonadota	Gammaproteobacteria	Enterobacterales	Enterobacteriaceae	Klebsiella	Klebsiella aerogenes	2519	99.57	Klebsiella aerogenes	Klebsiella	127	OTU3	OTU3	0	100	None
L1-6ET-A	OM164394	Q06	Experimental/Fg-treated Silks	L	CO430	T	27F	3	0.00214133	TGCAGTCGNNCGGTAGCACAGAGAGCTTGCTCTCGGGTGACGAGTGGCGGACGGGTGAGTAATGTCTGGGAAACTGCCTGATGGAGGGGGATAACTACTGGAAACGGTAGCTAATACCGCATAACGTCGCAAGACCAAAGAGGGGGACCTTCGGGCCTCTTGCCATCAGATGTGCCCAGATGGGATTAGCTAGTAGGTGGGGTAACGGCTCACCTAGGCGACGATCCCTAGCTGGTCTGAGAGGATGACCAGCCACACTGGAACTGAGACACGGTCCAGACTCCTACGGGAGGCAGCAGTGGGGAATATTGCACAATGGGCGCAAGCCTGATGCAGCCATGCCGCGTGTATGAAGAAGGCCTTCGGGTTGTAAAGTACTTTCAGCGGGGAGGAAGGTGT…	1401	Pseudomonadota	Gammaproteobacteria	Enterobacterales	Enterobacteriaceae	0	0	2511	99.79	Enterobacter ludwigii	Enterobacter	75	OTU3	OTU3	0	100	None
P1-4ET-B	OM164404	Q30	Experimental/Fg-treated Silks	P	CO432	T	27F	1	0.000707714	CATGCAAGTCGAACGGTAGCACAGAGAGCTTGCTCTCGGGTGACGAGTGGCGGACGGGTGAGTAATGTCTGGGAAACTGCCTGATGGAGGGGGATAACTACTGGAAACGGTAGCTAATACCGCATAACGTCGCAAGACCAAAGAGGGGGACCTTCGGGCCTCTTGCCATCAGATGTGCCCAGATGGGATTAGCTAGTAGGTGGGGTAACGGCTCACCTAGGCGACGATCCCTAGCTGGTCTGAGAGGATGACCAGCCACACTGGAACTGAGACACGGTCCAGACTCCTACGGGAGGCAGCAGTGGGGAATATTGCACAATGGGCGCAAGCCTGATGCAGCCATGCCGCGTGTATGAAGAAGGCCTTCGGGTTGTAAAGTACTTTCAGCGGGGAGGAAGG…	1413	Pseudomonadota	Gammaproteobacteria	Enterobacterales	Erwiniaceae	0	0	2584	99.65	Pantoea agglomerans	Pantoea	201	OTU3	OTU3	0	100	None
P1-6ET-C	OM164406	Q33	Experimental/Fg-treated Silks	P	CO430	T	27F	1	0.000710732	TGCAAGTCGAACGGTAGCACAGAGAGCTTGCTCTCGGGTGACGAGTGGCGGACGGGTGAGTAATGTCTGGGAAACTGCCTGATGGAGGGGGATAACTACTGGAAACGGTAGCTAATACCGCATAACGTCGCAAGACCAAAGAGGGGGACCTTCGGGCCTCTTGCCATCAGATGTGCCCAGATGGGATTAGCTAGTAGGTGGGGTAACGGCTCACCTAGGCGACGATCCCTAGCTGGTCTGAGAGGATGACCAGCCACACTGGAACTGAGACACGGTCCAGACTCCTACGGGAGGCAGCAGTGGGGAATATTGCACAATGGGCGCAAGCCTGATGCAGCCATGCCGCGTGTATGAAGAAGGCCTTCGGGTTGTAAAGTACTTTCAGCGGGGAGGAAGGTG…	1407	Pseudomonadota	Gammaproteobacteria	Enterobacterales	Enterobacteriaceae	0	0	2593	99.93	Enterobacter ludwigii	Enterobacter	75	OTU3	OTU3	0	100	None
P1-6ET-H	OM164409	Q40	Experimental/Fg-treated Silks	P	CO430	T	27F	0	0	GTCGAACGGTAGCACAGAGAGCTTGCTCTCGGGTGACGAGTGGCGGACGGGTGAGTAATGTCTGGGAAACTGCCTGATGGAGGGGGATAACTACTGGAAACGGTAGCTAATACCGCATAACGTCGCAAGACCAAAGAGGGGGACCTTCGGGCCTCTTGCCATCAGATGTGCCCAGATGGGATTAGCTAGTAGGTGGGGTAACGGCTCACCTAGGCGACGATCCCTAGCTGGTCTGAGAGGATGACCAGCCACACTGGAACTGAGACACGGTCCAGACTCCTACGGGAGGCAGCAGTGGGGAATATTGCACAATGGGCGCAAGCCTGATGCAGCCATGCCGCGTGTATGAAGAAGGCCTTCGGGTTGTAAAGTACTTTCAGCGGGGAGGAAGGTGTTGTG…	1397	Pseudomonadota	Gammaproteobacteria	Enterobacterales	Enterobacteriaceae	Enterobacter	Enterobacter ludwigii	2580	100	Enterobacter ludwigii	Enterobacter	75	OTU3	OTU3	0	100	None
P1-6ET-L	OM164411	Q42	Experimental/Fg-treated Silks	P	CO430	T	27F	0	0	TCGAACGGTAGCACAGAGAGCTTGCTCTCGGGTGACGAGTGGCGGACGGGTGAGTAATGTCTGGGAAACTGCCTGATGGAGGGGGATAACTACTGGAAACGGTAGCTAATACCGCATAACGTCGCAAGACCAAAGAGGGGGACCTTCGGGCCTCTTGCCATCAGATGTGCCCAGATGGGATTAGCTAGTAGGTGGGGTAACGGCTCACCTAGGCGACGATCCCTAGCTGGTCTGAGAGGATGACCAGCCACACTGGAACTGAGACACGGTCCAGACTCCTACGGGAGGCAGCAGTGGGGAATATTGCACAATGGGCGCAAGCCTGATGCAGCCATGCCGCGTGTATGAAGAAGGCCTTCGGGTTGTAAAGTACTTTCAGCGGGGAGGAAGGTGTTGTGG…	1402	Pseudomonadota	Gammaproteobacteria	Enterobacterales	Enterobacteriaceae	Enterobacter	Enterobacter ludwigii	2526	100	Enterobacter ludwigii	Enterobacter	75	OTU3	OTU3	0	100	None
P1-6ET-G	MT777215	Q44	Experimental/Fg-treated Silks	P	CO430	T	27F	1	0.000707714	CATGCAAGTCGAGCGGTAGCACAGAGAGCTTGCTCTCGGGTGACGAGCGGCGGACGGGTGAGTAATGTCTGGGAAACTGCCTGATGGAGGGGGATAACTACTGGAAACGGTAGCTAATACCGCATAACGTCGCAAGACCAAAGTGGGGGACCTTCGGGCCTCATGCCATCAGATGTGCCCAGATGGGATTAGCTAGTAGGTGGGGTAATGGCTCACCTAGGCGACGATCCCTAGCTGGTCTGAGAGGATGACCAGCCACACTGGAACTGAGACACGGTCCAGACTCCTACGGGAGGCAGCAGTGGGGAATATTGCACAATGGGCGCAAGCCTGATGCAGCCATGCCGCGTGTATGAAGAAGGCCTTCGGGTTGTAAAGTACTTTCAGCGAGGAGGAAGG…	1413	Pseudomonadota	Gammaproteobacteria	Enterobacterales	Enterobacteriaceae	Klebsiella	Klebsiella aerogenes	2591	99.72	Klebsiella aerogenes	Klebsiella	118	OTU3	OTU3	0	100	None
L1-6ET-J	OM164421	Q70	Experimental/Fg-treated Silks	L	CO430	T	27F	2	0.00142653	TGCAGTCGAGCGGTAGCACAGAGAGCTTGCTCTCGGGTGACGAGCGGCGGACGGGTGAGTAATGTCTGGGAAACTGCCTGATGGAGGGGGATAACTACTGGAAACGGTAGCTAATACCGCATAACGTCGCAAGACCAAAGTGGGGGACCTTCGGGCCTCATGCCATCAGATGTGCCCAGATGGGATTAGCTAGTAGGTGGGGTAATGGCTCACCTAGGCGACGATCCCTAGCTGGTCTGAGAGGATGACCAGCCACACTGGAACTGAGACACGGTCCAGACTCCTACGGGAGGCAGCAGTGGGGAATATTGCACAATGGGCGCAAGCCTGATGCAGCCATGCCGCGTGTATGAAGAAGGCCTTCGGGTTGTAAAGTACTTTCAGCGAGGAGGAAGGCNT…	1402	Pseudomonadota	Gammaproteobacteria	Enterobacterales	Enterobacteriaceae	Klebsiella	Klebsiella aerogenes	2508	99.71	Klebsiella aerogenes	Klebsiella	118	OTU3	OTU3	0	100	None
L1-18ET-F	OM164449	R81	Experimental/Fg-treated Silks	L	P38157	T	27F	5	0.00352609	CATGCAGTCGAACGGTAGCACAGAGAGCTTGCTCTTGGGTGACGAGTGGCGGACGGGTGAGTAATGTCTGGGAAACTGCCCGATGGAGGGGGATAACTACTGGAAACGGTAGCTAATACCGCATAACGTCTTCGGACCAAAGTGGGGGACCTTCGGGCCTCACACCATCGGATGTGCCCAGATGGGATTAGCTAGTAGGTGGGGTAACGGCTCACCTAGGCGACGATCCCTAGCTGGTCTGAGAGGATGACCAGCCACACTGGAACTGAGACACGGTCCAGACTCCTACGGGAGGCAGCAGTGGGGAATATTGCACAATGGGCGCAAGCCTGATGCAGCCATGCCGCGTGTATGAAGAAGGCCTTCGGGTTGTAAAGTACTTTCAGTGGGGAGGAAGGC…	1418	Pseudomonadota	Gammaproteobacteria	Enterobacterales	Erwiniaceae	Erwinia	Erwinia aphidicola	2582	99.51	Erwinia aphidicola	Erwinia	92	OTU3	OTU3	0	100	None
P1-18ET-G	OM164462	S36	Experimental/Fg-treated Silks	P	P38157	T	27F	6	0.0042523	CATGCAGTCGAACGGTAGCACAGAGAGCTTGCTCTTGGGTGACGAGTGGCGGACGGGTGAGTAATGTCTGGGAAACTGCCCGATGGAGGGGGATAACTACTGGAAACGGTAGCTAATACCGCATAACGTCTTCGGACCAAAGTGGGGGACCTTCGGGCCTCACACCATCGGATGTGCCCAGATGGGATTAGCTAGTAGGTGGGGTAACGGCTCACCTAGGCGACGATCCCTAGCTGGTCTGAGAGGATGACCAGCCACACTGGAACTGAGACACGGTCCAGACTCCTACGGGAGGCAGCAGTGGGGAATATTGCACAATGGGCGCAAGCCTGATGCAGCCATGCCGCGTGTATGAAGAAGGCCTTCGGGTTGTAAAGTACTTTCAGTGGGGANGGAAGG…	1411	Pseudomonadota	Gammaproteobacteria	Enterobacterales	Erwiniaceae	Erwinia	Erwinia aphidicola	2566	99.5	Erwinia aphidicola	Erwinia	92	OTU3	OTU3	0	100	None
P1-18ET-J	OM164463	S37	Experimental/Fg-treated Silks	P	P38157	T	27F	5	0.00352609	ATGCAAGTCGAACGGTAGCACAGAGAGCTTGCTCTTGGGTGACGAGTGGCGGACGGGTGAGTAATGTCTGGGAAACTGCCCGATGGAGGGGGATAACTACTGGAAACGGTAGCTAATACCGCATAACGTCTTCGGACCAAAGTGGGGGACCTTCGGGCCTCACACCATCGGATGTGCCCAGATGGGATTAGCTAGTAGGTGGGGTAACGGCTCACCTAGGCGACGATCCCTAGCTGGTCTGAGAGGATGACCAGCCACACTGGAACTGAGACACGGTCCAGACTCCTACGGGAGGCAGCAGTGGGGAATATTGCACAATGGGCGCAAGCCTGATGCAGCCATGCCGCGTGTATGAAGAAGGCCTTCGGGTTGTAAAGTACTTTCAGTGGGGAGGAAGGC…	1418	Pseudomonadota	Gammaproteobacteria	Enterobacterales	Erwiniaceae	Erwinia	Erwinia aphidicola	2579	99.51	Erwinia aphidicola	Erwinia	93	OTU3	OTU3	0	100	None
P1-11ET-A	MT777227	S41	Experimental/Fg-treated Silks	P	CO452	T	27F	2	0.00142959	TCGAGCGGTAGCACAGAGAGCTTGCTCTCGGGTGACGAGCGGCGGACGGGTGAGTAATGTCTGGGAAACTGCCTGATGGAGGGGGATAACTACTGGAAACGGTAGCTAATACCGCATAACGTCGCAAGACCAAAGTGGGGGACCTTCGGGCCTCATGCCATCAGATGTGCCCAGATGGGATTAGCTAGTAGGTGGGGTAATGGCTCACCTAGGCGACGATCCCTAGCTGGTCTGAGAGGATGACCAGCCACACTGGAACTGAGACACGGTCCAGACTCCTACGGGAGGCAGCAGTGGGGAATATTGCACAATGGGCGCAAGCCTGATGCAGCCATGCCGCGTGTATGAAGAAGGCCTTCGGGTTGTAAAGTACTTTCAGCGAGGAGGAAGGCATNAAGG…	1399	Pseudomonadota	Gammaproteobacteria	Enterobacterales	Enterobacteriaceae	Klebsiella	Klebsiella aerogenes	2558	99.64	Klebsiella aerogenes	Klebsiella	118	OTU3	OTU3	0	100	None
L1-19ET-F	OM164471	S56	Experimental/Fg-treated Silks	L	P9855HR	T	27F	0	0	CATGCAGTCGAACGGTAGCACAGAGAGCTTGCTCTCGGGTGACGAGTGGCGGACGGGTGAGTAATGTCTGGGAAACTGCCTGATGGAGGGGGATAACTACTGGAAACGGTAGCTAATACCGCATAACGTCGCAAGACCAAAGAGGGGGACCTTCGGGCCTCTTGCCATCAGATGTGCCCAGATGGGATTAGCTAGTAGGTGGGGTAACGGCTCACCTAGGCGACGATCCCTAGCTGGTCTGAGAGGATGACCAGCCACACTGGAACTGAGACACGGTCCAGACTCCTACGGGAGGCAGCAGTGGGGAATATTGCACAATGGGCGCAAGCCTGATGCAGCCATGCCGCGTGTATGAAGAAGGCCTTCGGGTTGTAAAGTACTTTCAGCGGGGAGGAAGGT…	1405	Pseudomonadota	Gammaproteobacteria	Enterobacterales	Erwiniaceae	0	0	2515	99.72	Pantoea agglomerans	Pantoea	201	OTU3	OTU3	0	100	None
P1-19ET-O	OM164490	T30	Experimental/Fg-treated Silks	P	P9855HR	T	27F	3	0.00212014	CATGCAGTCGAACGGTAGCACAGAGAGCTTGCTCTCGGGTGACGAGTGGCGGACGGGTGAGTAATGTCTGGGAAACTGCCTGATGGAGGGGGATAACTACTGGAAACGGTAGCTAATACCGCATAACGTCGCAAGACCAAAGAGGGGGACCTTCGGGCCTCTTGCCATCAGATGTGCCCAGATGGGATTAGCTAGTAGGTGGGGTAACGGCTCACCTAGGCGACGATCCCTAGCTGGTCTGAGAGGATGACCAGCCACACTGGAACTGAGACACGGTCCAGACTCCTACGGGAGGCAGCAGTGGGGAATATTGCACAATGGGCGCAAGCCTGATGCAGCCATGCCGCGTGTATGAAGAAGGCCTTCGGGTTGTAAAGTACTTTCAGCGGGGAGGAAGGT…	1415	Pseudomonadota	Gammaproteobacteria	Enterobacterales	Erwiniaceae	0	0	2571	99.44	Pantoea agglomerans	Pantoea	201	OTU3	OTU3	0	100	None
P1-8ET-D	OM164493	T36	Experimental/Fg-treated Silks	P	CO325	T	27F	9	0.00640569	CATGCAGTCGAGCGGTAGCACAGGGAGCTTGCTCCTGGGTGACGAGCGGCGGACGGGTGAGTAATGTCTGGGAAACTGCCTGATGGAGGGGGATAACTACTGGAAACGGTAGCTAATACCGCATAACGTCGCAAGACCAAAGAGGGGGACCTTCGGGCCTCTTGCCATCAGATGTGCCCAGATGGGATTAGCTAGTAGGTGGGGTAACGGCTCACCTAGGCGACGATCCCTAGCTGGTCTGAGAGGATGACCAGCCACACTGGAACTGAGACACGGTCCAGACTCCTACGGGAGGCAGCAGTGGGGAATATTGCACAATGGGCGCAAGCCTGATGCAGCCATGCCGCGTGTATGAAGAAGGCCTTCGGGTTGTAAAGTACTTTCAGCGGGGAGGAAGGT…	1405	Pseudomonadota	Gammaproteobacteria	Enterobacterales	Enterobacteriaceae	0	0	2508	98.79	Enterobacter asburiae	Enterobacter	203	OTU3	0	OTU3	98.82	3 N mismatches
P1-16ET-A	OM241012	T50	Experimental/Fg-treated Silks	P	CO462	T	27F	29	0.0287698	AAGTCGAGCGGTANCACAGGGAGCTTGCTCCTGGGTGACGAGCGGCGGACGGGTGAGTAATGTCTGGGAAACTGCCTGATGGAGGGGGATAACTACTGGAAACGGTAGCTAATACCGCATAACGTCGCAAGACCAAAGAGGGGGACCTTCGGGCCTCTTGCCATCAGATGTGCCCAGATGGGATTAGCTAGTAGGTGGGGTAACGGCTCACCTAGGCGACGATCCCTAGCTGGTCTGAGAGGATGACCAGCCACACTGGAACTGAGACACGGTCCAGACTCCTACGGGAGGCAGCAGTGGGGAATATTGCACAATGGGCGCAAGCCTGATGCAGCCATGCCGCGTGTATGAAGAAGGCCTTCGGGTTGTAAAGTACTTTCAGCGGGGAGGAAGGTGTTG…	1008	Pseudomonadota	Gammaproteobacteria	Enterobacterales	Enterobacteriaceae	0	0	1458	98.53	Enterobacter asburiae	Enterobacter	74&203&71	OTU3	0	OTU3	99.21	2 N mismatches
P1-13ET-M	OM164504	T64	Experimental/Fg-treated Silks	P	CO444	T	27F	4	0.00292612	GGAGCTTGCTCCCGGGTGACGAGCGGCGGACGGGTGAGTAATGTCTGGGAAACTGCCTGATGGAGGGGGATAACTACTGGAAACGGTAGCTAATACCGCATAACGTCGCAAGACCAAAGAGGGGGACCTTCGGGCCTCTTGCCATCAGATGTGCCCAGATGGGATTAGCTAGTAGGTGGGGTAACGGCTCACCTAGGCGACGATCCCTAGCTGGTCTGAGAGGATGACCAGCCACACTGGAACTGAGACACGGTCCAGACTCCTACGGGAGGCAGCAGTGGGGAATATTGCACAATGGGCGCAAGCCTGATGCAGCCATGCCGCGTGTATGAAGAAGGCCTTCGGGTTGTAAAGTACTTTCAGCGGGGAGGAAGGTGTTGAGGTTAATAACCTCNNCAA…	1367	Pseudomonadota	Gammaproteobacteria	Enterobacterales	Erwiniaceae	0	0	2475	99.27	Pantoea agglomerans	Pantoea	204&205&202	OTU3	OTU3	0	100	None
L1-13EB-C	OM241033	T77	Experimental/Fg-treated Silks	L	CO444	B	27F	34	0.0325048	GGTAGCGCCCTCCCGAAGGTTAAGCTACCTACTTCTTTTGCAACCCACTCCCATGGTGTGACGGGCGGTGTGTACAAGGCCCGGGAACGTATTCACCGTAGCATTCTGATCTACGATTACTAGCGATTCCGACTTCATGGAGTCGAGTTGCAGACTCCAATCCGGACTACGACGCACTTTATGAGGTCCGCTTGCTCTCGCGAGTTCGCTTCTCTTTGTATGCGCCATTGTAGCACGTGTGTAGCCCTACTCGTAAGGGCCATGATGACTTGACGTCATCCCCACCTTCCTCCAGTTTATCACTGGCAGTCTCCTTTGAGTTCCCGGCCGGACCGCTGGCAACAAAGGATAAGGGTTGCGCTCGTTGCGGGACTTAACCCAACATTTCACAACACGAGC…	1046	Pseudomonadota	Gammaproteobacteria	Enterobacterales	Erwiniaceae	0	0	1731	97.08	Pantoea agglomerans	Pantoea	201	OTU3	0	OTU3	99.21	2 N mismatches
P1-8ET-K	MT777231	U10	Experimental/Fg-treated Silks	P	CO325	T	27F	4	0.00285103	AGTCGAGCGGTANCNCANGGAGCTTGCTCCTGGGTGACGAGCGGCGGACGGGTGAGTAATGTCTGGGAAACTGCCTGATGGAGGGGGATAACTACTGGAAACGGTAGCTAATACCGCATAACGTCGCAAGACCAAAGAGGGGGACCTTCGGGCCTCTTGCCATCAGATGTGCCCAGATGGGATTAGCTAGTAGGTGGGGTAACGGCTCACCTAGGCGACGATCCCTAGCTGGTCTGAGAGGATGACCAGCCACACTGGAACTGAGACACGGTCCAGACTCCTACGGGAGGCAGCAGTGGGGAATATTGCACAATGGGCGCAAGCCTGATGCAGCCATGCCGCGTGTATGAAGAAGGCCTTCGGGTTGTAAAGTACTTTCAGCGGGGAGGAAGGTGTTGA…	1403	Pseudomonadota	Gammaproteobacteria	Enterobacterales	Erwiniaceae	0	0	2525	99.07	Pantoea agglomerans	Pantoea	203	OTU3	OTU3	0	100	None
L1-8ET-B	OM164525	U42	Experimental/Fg-treated Silks	L	CO325	T	27F	2	0.00141844	TGCAGTCGAGCGGTAGCACAGGNAGCTTGCTCCTGGGTGACGAGCGGCGGACGGGTGAGTAATGTCTGGGAAACTGCCTGATGGAGGGGGATAACTACTGGAAACGGTAGCTAATACCGCATAACGTCGCAAGACCAAAGAGGGGGACCTTCGGGCCTCTTGCCATCAGATGTGCCCAGATGGGATTAGCTAGTAGGTGGGGTAACGGCTCACCTAGGCGACGATCCCTAGCTGGTCTGAGAGGATGACCAGCCACACTGGAACTGAGACACGGTCCAGACTCCTACGGGAGGCAGCAGTGGGGAATATTGCACAATGGGCGCAAGCCTGATGCAGCCATGCCGCGTGTATGAAGAAGGCCTTCGGGTTGTAAAGTACTTTCAGCGGGGAGGAAGGTGT…	1410	Pseudomonadota	Gammaproteobacteria	Enterobacterales	Erwiniaceae	0	0	2490	99.22	Pantoea agglomerans	Pantoea	203	OTU3	OTU3	0	100	None
L1-16ET-K	OM164529	U53	Experimental/Fg-treated Silks	L	CO462	T	27F	5	0.0035461	TGCAGTCGAGCGGTAGCACAGGGAGCTTGCTCCTGGGTGACGAGCGGCGGACGGGTGAGTAATGTCTGGGAAACTGCCTGATGGAGGGGGATAACTACTGGAAACGGTAGCTAATACCGCATAACGTCGCAAGACCAAAGAGGGGGACCTTCGGGCCTCTTGCCATCAGATGTGCCCAGATGGGATTAGCTAGTAGGTGGGGTAACGGCTCACCTAGGCGACGATCCCTAGCTGGTCTGAGAGGATGACCAGCCACACTGGAACTGAGACACGGTCCAGACTCCTACGGGAGGCAGCAGTGGGGAATATTGCACAATGGGCGCAAGCCTGATGCAGCCATGCCGCGTGTATGAAGAAGGCCTTCGGGTTGTAAAGTACTTTCAGCGGGGAGGAAGGTGT…	1410	Pseudomonadota	Gammaproteobacteria	Enterobacterales	Erwiniaceae	0	0	2478	99.01	Pantoea agglomerans	Pantoea	204	OTU3	OTU3	0	100	None
L1-13ET-L	MT305795	U87	Experimental/Fg-treated Silks	L	CO444	T	27F	11	0.0104662	CGCCCTCCCGAAGGTTAAGCTACCTACTTCTTTTGCAACCCACTCCCATGGTGTGACGGGCGGTGTGTACAAGGCCCGGGAACGTATTCACCGTAGCATTCTGATCTACGATTACTAGCGATTCCGACTTCACGGAGTCGAGTTGCAGACTCCGATCCGGACTACGACGCACTTTATGAGGTCCGCTTGCTCTCGCGAGGTCGCTTCTCTTTGTATGCGCCATTGTAGCACGTGTGTAGCCCTGGCCGTAAGGGCCATGATGACTTGACGTCATCCCCACCTTCCTCCGGTTTATCACCGGCAGTCTCCTTTGAGTTCCCACCATTACGTGCTGGCAACAAAGGATAAGGGTTGCGCTCGTTGCGGGACTTAACCCAACATTTCACAACACGAGCTGAC…	1051	Pseudomonadota	Gammaproteobacteria	Enterobacterales	Erwiniaceae	Erwinia	0	1839	98.86	Erwinia persicina	Erwinia	91	OTU3	0	OTU3	99.61Reverse	1 N mismatch
P1-5CT-E	OM164498	T46	Control/Healthy Silks	P	CO431	T	27F	3	0.00212314	CATGCAGTCGAGCGGAGAGAGGTAGCTTGCTACTGATCTTAGCGGCGGACGGGTGAGTAATGCTTAGGAATCTGCCTATTAGTGGGGGACAACATTTCGAAAGGAATGCTAATACCGCATACGTCCTACGGGAGAAAGCAGGGGATCTTCGGACCTTGCGCTAATAGATGAGCCTAAGTCGGATTAGCTAGTTGGTGGGGTAAAGGCCTACCAAGGCGACGATCTGTAGCGGGTCTGAGAGGATGATCCGCCACACTGGGACTGAGACACGGCCCAGACTCCTACGGGAGGCAGCAGTGGGGAATATTGGACAATGGGCGGAAGCCTGATCCAGCCATGCCGCGTGTGTGAAGAAGGCCTTATGGTTGTAAAGCACTTTAAGCGAGGAGGAGGCTACTT…	1413	Pseudomonadota	Gammaproteobacteria	Pseudomonadales	Moraxellaceae	Acinetobacter	Acinetobacter oleivorans	2556	99.36	Acinetobacter oleivorans	Acinetobacter	8	OTU31	0	OTU31	99.61	1 N mismatch
L1-2CT-J	OM164522	U35	Control/Healthy Silks	L	CO441	T	27F	0	0	CATGCAAGTCGAGCGGAGAGAGGTAGCTTGCTACTGATCTTAGCGGCGGACGGGTGAGTAATGCTTAGGAATCTGCCTATTAGTGGGGGACAACATTTCGAAAGGAATGCTAATACCGCATACGTCCTACGGGAGAAAGCAGGGGATCTTCGGACCTTGCGCTAATAGATGAGCCTAAGTCGGATTAGCTAGTTGGTGGGGTAAAGGCCTACCAAGGCGACGATCTGTAGCGGGTCTGAGAGGATGATCCGCCACACTGGGACTGAGACACGGCCCAGACTCCTACGGGAGGCAGCAGTGGGGAATATTGGACAATGGGCGGAAGCCTGATCCAGCCATGCCGCGTGTGTGAAGAAGGCCTTATGGTTGTAAAGCACTTTAAGCGAGGAGGAGGCTACT…	1402	Pseudomonadota	Gammaproteobacteria	Pseudomonadales	Moraxellaceae	Acinetobacter	Acinetobacter oleivorans	2529	100	Acinetobacter oleivorans	Acinetobacter	7	OTU31	OTU31	0	100	None
P1-5ET-I	OM164405	Q31	Experimental/Fg-treated Silks	P	CO431	T	27F	1	0.000711744	TGCAGTCGAGCGGAGAGAGGTAGCTTGCTACTGATCTTAGCGGCGGACGGGTGAGTAATGCTTAGGAATCTGCCTATTAGTGGGGGACAACATTTCGAAAGGAATGCTAATACCGCATACGTCCTACGGGAGAAAGCAGGGGATCTTCGGACCTTGCGCTAATAGATGAGCCTAAGTCGGATTAGCTAGTTGGTGGGGTAAAGGCCTACCAAGGCGACGATCTGTAGCGGGTCTGAGAGGATGATCCGCCACACTGGGACTGAGACACGGCCCAGACTCCTACGGGAGGCAGCAGTGGGGAATATTGGACAATGGGCGGAAGCCTGATCCAGCCATGCCGCGTGTGTGAAGAAGGCCTTATGGTTGTAAAGCACTTTAAGCGAGGAGGAGGCTACTTTA…	1405	Pseudomonadota	Gammaproteobacteria	Pseudomonadales	Moraxellaceae	Acinetobacter	Acinetobacter oleivorans	2522	99.93	Acinetobacter oleivorans	Acinetobacter	7	OTU31	OTU31	0	100	None
P1-17ET-E	OM164465	S42	Experimental/Fg-treated Silks	P	P35837	T	27F	0	0	CTTAGCGGCGGACGGGTGAGTAATGCTTAGGAATCTGCCTATTAGTGGGGGACAACATTTCGAAAGGAATGCTAATACCGCATACGTCCTACGGGAGAAAGCAGGGGATCTTCGGACCTTGCGCTAATAGATGAGCCTAAGTCGGATTAGCTAGTTGGTGGGGTAAAGGCCTACCAAGGCGACGATCTGTAGCGGGTCTGAGAGGATGATCCGCCACACTGGGACTGAGACACGGCCCAGACTCCTACGGGAGGCAGCAGTGGGGAATATTGGACAATGGGCGGAAGCCTGATCCAGCCATGCCGCGTGTGTGAAGAAGGCCTTATGGTTGTAAAGCACTTTAAGCGAGGAGGAGGCTACTTTAGTTAATACCTAGAGATAGTGGACGTTACTCGCAGA…	1371	Pseudomonadota	Gammaproteobacteria	Pseudomonadales	Moraxellaceae	Acinetobacter	Acinetobacter oleivorans	2527	99.93	Acinetobacter oleivorans	Acinetobacter	7	OTU31	OTU31	0	100	None
P1-17ET-K	OM164484	T16	Experimental/Fg-treated Silks	P	P35837	T	27F	2	0.00145773	CTTAGCGGCGGACGGGTGAGTAATGCTTAGGAATCTGCCTATTAGTGGGGGACAACATTTCGAAAGGAATGCTAATACCGCATACGTCCTACGGGAGAAAGCAGGGGATCTTCGGACCTTGCGCTAATAGATGAGCCTAAGTCGGATTAGCTAGTTGGTGGGGTAAAGGCCTACCAAGGCGACGATCTGTAGCGGGTCTGAGAGGATGATCCGCCACACTGGGACTGAGACACGGCCCAGACTCCTACGGGAGGCAGCAGTGGGGAATATTGGACAATGGGCGGAAGCCTGATCCAGCCATGCCGCGTGTGTGAAGAAGGCCTTATGGTTGTAAAGCACTTTAAGCGAGGAGGAGGCTACTTTAGTTAATACCTAGAGATAGTGGACGTTACTCGCAGA…	1372	Pseudomonadota	Gammaproteobacteria	Pseudomonadales	Moraxellaceae	Acinetobacter	Acinetobacter oleivorans	2519	99.78	Acinetobacter oleivorans	Acinetobacter	7	OTU31	OTU31	0	100	None
P1-17ET-L	OM164542	V01 AKA T31	Experimental/Fg-treated Silks	P	P35837	T	27F	1	0.000728863	CTTAGCGGCGGACGGGTGAGTAATGCTTAGGAATCTGCCTATTAGTGGGGGACAACATTTCGAAAGGAATGCTAATACCGCATACGTCCTACGGGAGAAAGCAGGGGATCTTCGGACCTTGCGCTAATAGATGAGCCTAAGTCGGATTAGCTAGTTGGTGGGGTAAAGGCCTACCAAGGCGACGATCTGTAGCGGGTCTGAGAGGATGATCCGCCACACTGGGACTGAGACACGGCCCAGACTCCTACGGGAGGCAGCAGTGGGGAATATTGGACAATGGGCGGAAGCCTGATCCAGCCATGCCGCGTGTGTGAAGAAGGCCTTATGGTTGTAAAGCACTTTAAGCGAGGAGGAGGCTACTTTAGTTAATACCTAGAGATAGTGGACGTTACTCGCAGA…	1372	Pseudomonadota	Gammaproteobacteria	Pseudomonadales	Moraxellaceae	Acinetobacter	Acinetobacter oleivorans	2455	99.85	Acinetobacter oleivorans	Acinetobacter	386	OTU31	OTU31	0	100	None
L1-3ET-F	MT355345	L12	Experimental/Fg-treated Silks	L	CO433	T	27F	0	0	CTTCGGTAATTGACCTAGCGGCGGACGGGTGAGTAATACTTAGGAATCTGCCTATTAATGGGGGACAACATCTCGAAAGGGATGCTAATACCGCATACGCCCTACGGGGGAAAGCAGGGGATCACTTGTGACCTTGCGTTAATAGATGAGCCTAAGTCGGATTAGCTAGTTGGTGGGGTAAAGGCCTACCAAGGCGACGATCTGTAGCGGGTCTGAGAGGATGATCCGCCACACTGGGACTGAGACACGGCCCAGACTCCTACGGGAGGCAGCAGTGGGGAATATTGGACAATGGGGGGAACCCTGATCCAGCCATGCCGCGTGTGTGAAGAAGGCCTTATGGTTGTAAAGCACTTTAAGCGAGGAGGAGGCTCTTTTGGTTAATACCCAAGATGAGTG…	1384	Pseudomonadota	Gammaproteobacteria	Pseudomonadales	Moraxellaceae	Acinetobacter	Acinetobacter bereziniae	2489	99.93	Acinetobacter bereziniae	Acinetobacter	3	OTU32	OTU32	0	100	none
L1-1ET-Q	OM164519	U29	Experimental/Fg-treated Silks	L	CO449	T	27F	1	0.000710227	ATGCAAGTCGAGCGGGGGAGANTGCTTCGGTAATTGACCTAGCGGCGGACGGGTGAGTAATACTTAGGAATCTGCCTATTAATGGGGGACAACATCTCGAAAGGGATGCTAATACCGCATACGCCCTACGGGGGAAAGCAGGGGATCACTTGTGACCTTGCGTTAATAGATGAGCCTAAGTCGGATTAGCTAGTTGGTGGGGTAAAGGCCTACCAAGGCGACGATCTGTAGCGGGTCTGAGAGGATGATCCGCCACACTGGGACTGAGACACGGCCCAGACTCCTACGGGAGGCAGCAGTGGGGAATATTGGACAATGGGGGGAACCCTGATCCAGCCATGCCGCGTGTGTGAAGAAGGCCTTATGGTTGTAAAGCACTTTAAGCGAGGAGGAGGCTCT…	1408	Pseudomonadota	Gammaproteobacteria	Pseudomonadales	Moraxellaceae	Acinetobacter	Acinetobacter guillouiae	2497	99.36	Acinetobacter guillouiae	Acinetobacter	5	OTU32	OTU32	0	100	None
P1-4CT-I	MT355348	M31	Control/Healthy Silks	P	CO432	T	27F	0	0	TGCAGTCGAACGGCAGCACAGGAGAGCTTGCTCTCTGGGTGGCGAGTGGCGGACGGGTGAGGAATACATCGGAATCTACTCTGTCGTGGGGGATAACGTAGGGAAACTTACGCTAATACCGCATACGACCTACGGGTGAAAGCAGGGGATCTTCGGGCCTTGCGCGATTGAATGAGCCGATGTCGGATTAGCTAGTTGGCGGGGTAAAGGCCCACCAAGGCGACGATCCGTAGCTGGTCTGAGAGGATGATCAGCCACACTGGAACTGAGACACGGTCCAGACTCCTACGGGAGGCAGCAGTGGGGAATATTGGACAATGGGCGCAAGCCTGATCCAGCCATACCGCGTGGGTGAAGAAGGCCTTCGGGTTGTAAAGCCCTTTTGTTGGGAAAGAAATC…	1407	Pseudomonadota	Gammaproteobacteria	Xanthomonadales	Xanthomonadaceae	Stenotrophomonas	Stenotrophomonas pavanii	2580	99.72	Stenotrophomonas pavanii	Stenotrophomonas	375	OTU34	OTU34	0	100	None
P1-11CT-F	MT355349	N37	Control/Healthy Silks	P	CO452	T	27F	0	0	TGCAGTCGAACGGCAGCACAGGAGAGCTTGCTCTCTGGGTGGCGAGTGGCGGACGGGTGAGGAATACATCGGAATCTACTCTGTCGTGGGGGATAACGTAGGGAAACTTACGCTAATACCGCATACGACCTACGGGTGAAAGCAGGGGATCTTCGGGCCTTGCGCGATTGAATGAGCCGATGTCGGATTAGCTAGTTGGCGGGGTAAAGGCCCACCAAGGCGACGATCCGTAGCTGGTCTGAGAGGATGATCAGCCACACTGGAACTGAGACACGGTCCAGACTCCTACGGGAGGCAGCAGTGGGGAATATTGGACAATGGGCGCAAGCCTGATCCAGCCATACCGCGTGGGTGAAGAAGGCCTTCGGGTTGTAAAGCCCTTTTGTTGGGAAAGAAATC…	1410	Pseudomonadota	Gammaproteobacteria	Xanthomonadales	Xanthomonadaceae	Stenotrophomonas	Stenotrophomonas pavanii	2586	99.72	Stenotrophomonas pavanii	Stenotrophomonas	375	OTU34	OTU34	0	100	None
L1-4CB-L	OM164344	O40	Control/Healthy Silks	L	CO432	B	27F	2	0.00143988	AGAGAGCTTGCTCTCTGGGTGGCGAGTGGCGGACGGGTGAGGAATACATCGGAATCTACTCTGTCGTGGGGGATAACGTAGGGAAACTTACGCTAATACCGCATACGACCTACGGGTGAAAGCAGGGGANCTTCNGGCCTTGCGCGATTGAATGAGCCGATGTCGGATTAGCTAGTTGGCGGGGTAAAGGCCCACCAAGGCGACGATCCGTAGCTGGTCTGAGAGGATGATCAGCCACACTGGAACTGAGACACGGTCCAGACTCCTACGGGAGGCAGCAGTGGGGAATATTGGACAATGGGCGCAAGCCTGATCCAGCCATACCGCGTGGGTGAAGAAGGCCTTCGGGTTGTAAAGCCCTTTTGTTGGGAAAGAAATCCAGCTGGCTAATACCCGGTT…	1389	Pseudomonadota	Gammaproteobacteria	Xanthomonadales	Xanthomonadaceae	Stenotrophomonas	Stenotrophomonas pavanii	2491	99.71	Stenotrophomonas pavanii	Stenotrophomonas	375	OTU34	OTU34	0	100	None
L1-11CB-A	OM164356	O67	Control/Healthy Silks	L	CO452	B	27F	2	0.00141543	TGCAAGTCGAACGGCAGCACAGGAGAGCTTGCTCTCTGGGTGGCGAGTGGCGGACGGGTGAGGAATACATCGGAATCTACTCTGTCGTGGGGGATAACGTAGGGAAACTTACGCTAATACCGCATACGACCTACGGGTGAAAGCAGGGGATCTTCGGACCTTGCGCGATTGAATGAGCCGATGTCGGATTAGCTAGTTGGCGGGGTAAAGGCCCACCAAGGCGACGATCCGTAGCTGGTCTGAGAGGATGATCAGCCACACTGGAACTGAGACACGGTCCAGACTCCTACGGGAGGCAGCAGTGGGGAATATTGGACAATGGGCGCAAGCCTGATCCAGCCATACCGCGTGGGTGAAGAAGGCCTTCGGGTTGTAAAGCCCTTTTGTTGGGAAAGAAAT…	1413	Pseudomonadota	Gammaproteobacteria	Xanthomonadales	Xanthomonadaceae	Stenotrophomonas	0	2524	99.57	Stenotrophomonas pavanii and Stenotrophomonas maltophilia	Stenotrophomonas	374	OTU34	OTU34	0	100	None
P1-11CB-I	OM302475	P06	Control/Healthy Silks	P	CO452	B	27F	3	0.00210379	two shorter sequences: CATGCAGTCGAACGGCAGCACAGGAGAGCTTGCTCTCTGGGTGGCGAGTGGCGGACGGGTGAGGAATACATCGGAATCTACTCTGTCGTGGGGGATAACGTAGGGAAACTTACGCTAATACCGCATACGACCTACGGGTGAAAGCAGGGGANCTTCGGGCCTTGCGCGATTGAATGAGCCGATGTCGGATTAGCTAGTTGGCGGGGTAAAGGCCCACCAAGGCGACGATCCGTAGCTGGTCTGAGAGGATGATCAGCCACACTGGAACTGAGACACGGTCCAGACTCCTACGGGAGGCAGCAGTGGGGAATATTGGACAATGGGCGCAAGCCTGATCCAGCCATACCGCGTGGGTGAAGAAGGCCTTCGGGTTGTA…	760&666	Pseudomonadota	Gammaproteobacteria	Xanthomonadales	Xanthomonadaceae	Stenotrophomonas	Stenotrophomonas pavanii	1391/1214	99.61/99.40	Stenotrophomonas pavanii	Stenotrophomonas	375	OTU34	0	OTU34	99.61	1 N mismatch
P1-11CB-L	OM164373	P31	Control/Healthy Silks	P	CO452	B	27F	0	0	GTCGAACGGCAGCACAGGAGAGCTTGCTCTCTGGGTGGCGAGTGGCGGACGGGTGAGGAATACATCGGAATCTACTCTGTCGTGGGGGATAACGTAGGGAAACTTACGCTAATACCGCATACGACCTACGGGTGAAAGCAGGGGATCTTCGGGCCTTGCGCGATTGAATGAGCCGATGTCGGATTAGCTAGTTGGCGGGGTAAAGGCCCACCAAGGCGACGATCCGTAGCTGGTCTGAGAGGATGATCAGCCACACTGGAACTGAGACACGGTCCAGACTCCTACGGGAGGCAGCAGTGGGGAATATTGGACAATGGGCGCAAGCCTGATCCAGCCATACCGCGTGGGTGAAGAAGGCCTTCGGGTTGTAAAGCCCTTTTGTTGGGAAAGAAATCCAGC…	1406	Pseudomonadota	Gammaproteobacteria	Xanthomonadales	Xanthomonadaceae	Stenotrophomonas	Stenotrophomonas pavanii	2526	99.79	Stenotrophomonas pavanii	Stenotrophomonas	375	OTU34	OTU34	0	100	None
P1-4CB-D	MT355350	P34	Control/Healthy Silks	P	CO432	B	27F	5	0.00354108	CATGCAGTCGAACGGCAGCACANNGAGAGCTTGCTCTCTGGGTGGCGAGTGGCGGACGGGTGAGGAATACATCGGAATCTACTCTGTCGTGGGGGATAACGTAGGGAAACTTACGCTAATACCGCATACGACCTACGGGTGAAAGCAGGGGANCTTCGGGCCTTGCGCGATTGAATGAGCCGATGTCGGATTAGCTAGTTGGCGGGGTAAAGGCCCACCAAGGCGACGATCCGTAGCTGGTCTGAGAGGATGATCAGCCACACTGGAACTGAGACACGGTCCAGACTCCTACGGGAGGCAGCAGTGGGGAATATTGGACAATGGGCGCAAGCCTGATCCAGCCATACCGCGTGGGTGAAGAAGGCCTTCGGGTTGTAAAGCCCTTTTGTTGGGAAAGAA…	1412	Pseudomonadota	Gammaproteobacteria	Xanthomonadales	Xanthomonadaceae	Stenotrophomonas	Stenotrophomonas pavanii	2575	99.43	Stenotrophomonas pavanii	Stenotrophomonas	375	OTU34	OTU34	0	100	None
P1-11CB-J	OM164387	P62	Control/Healthy Silks	P	CO452	B	27F	4	0.00283487	TCGAACGGCAGCACAGGAGAGCTTGCTCTCTGGGTGGCGAGTGGCGGACGGGTGAGGAATACATCGGAATCTACTCTGTCGTGGGGGATAACGTAGGGAAACTTACGCTAATACCGCATACGACCTACGGGTGAAAGCAGGGGANCTTCGGGCCTTGCGCGATTGAATGAGCCGATGTCGGATTAGCTAGTTGGCGGGGTAAAGGCCCACCAAGGCGACGATCCGTAGCTGGTCTGAGAGGATGATCAGCCACACTGGAACTGAGACACGGTCCAGACTCCTACGGGAGGCAGCAGTGGGGAATATTGGACAATGGGCGCAAGCCTGATCCAGCCATACCGCGTGGGTGAAGAAGGCCTTCGGGTTGTAAAGCCCTTTTGTTGGGAAAGAAATCCAGCT…	1411	Pseudomonadota	Gammaproteobacteria	Xanthomonadales	Xanthomonadaceae	Stenotrophomonas	Stenotrophomonas pavanii	2567	99.43	Stenotrophomonas pavanii	Stenotrophomonas	371	OTU34	0	OTU34	99.61	1 N mismatch
P1-19CT-A	OM164424	R08	Control/Healthy Silks	P	P9855HR	T	27F	0	0	TGCAGTCGAACGGCAGCACAGGAGAGCTTGCTCTCTGGGTGGCGAGTGGCGGACGGGTGAGGAATACATCGGAATCTACTCTGTCGTGGGGGATAACGTAGGGAAACTTACGCTAATACCGCATACGACCTACGGGTGAAAGCAGGGGATCTTCGGACCTTGCGCGATTGAATGAGCCGATGTCGGATTAGCTAGTTGGCGGGGTAAAGGCCCACCAAGGCGACGATCCGTAGCTGGTCTGAGAGGATGATCAGCCACACTGGAACTGAGACACGGTCCAGACTCCTACGGGAGGCAGCAGTGGGGAATATTGGACAATGGGCGCAAGCCTGATCCAGCCATACCGCGTGGGTGAAGAAGGCCTTCGGGTTGTAAAGCCCTTTTGTTGGGAAAGAAATC…	1410	Pseudomonadota	Gammaproteobacteria	Xanthomonadales	Xanthomonadaceae	Stenotrophomonas	0	2524	99.72	Stenotrophomonas pavanii	Stenotrophomonas	374	OTU34	OTU34	0	100	None
L1-17CT-C	OM164438	R54	Control/Healthy Silks	L	P35837	T	27F	9	0.00634249	ATGCAGTCGAACGGCAGCACAGGAGAGCTTGCTCTCTGGGTGGCGAGTGGCGGACGGGTGAGGAATACATCGGAATCTACTCTGTCGTGGGGGATAACGTAGGGAAACTTACGCTAATACCGCATACGACCTACGGGTGAAAGCAGGGGANCTTCNGACNTTGCGCGATTGAATGAGCCGATGTCGGATTAGCTAGTTGGCGGGGTAAAGGCCCACCAAGGCGACGATCCGTAGCTGGTCTGAGAGGATGATCAGCCACACTGGAACTGAGACACGGTCCAGACTCCTACGGGAGGCAGCAGTGGGGAATATTGGACAATGGGCGCAAGCCTGATCCAGCCATACCGCGTGGGTGAAGAAGGCCTTCGGGTTGTAAAGCCCTTTTGTTGGGAAAGAAAT…	1419	Pseudomonadota	Gammaproteobacteria	Xanthomonadales	Xanthomonadaceae	Stenotrophomonas	Stenotrophomonas pavanii	2543	98.87	Stenotrophomonas pavanii	Stenotrophomonas	369	OTU34	0	OTU34	98.83	3 N mismatches
L1-11CT-F	OM200079	T32 AKA U02 AKA U25	Control/Healthy Silks	L	CO452	T	27F	0	0	TGCAGTCGAACGGCAGCACAGGAGAGCTTGCTCTCTGGGTGGCGAGTGGCGGACGGGTGAGGAATACATCGGAATCTACTCTGTCGTGGGGGATAACGTAGGGAAACTTACGCTAATACCGCATACGACCTACGGGTGAAAGCAGGGGATCTTCGGGCCTTGCGCGATTGAATGAGCCGATGTCGGATTAGCTAGTTGGCGGGGTAAAGGCCCACCAAGGCGACGATCCGTAGCTGGTCTGAGAGGATGATCAGCCACACTGGAACTGAGACACGGTCCAGACTCCTACGGGAGGCAGCAGTGGGGAATATTGGACAATGGGCGCAAGCCTGATCCAGCCATACCGCGTGGGTGAAGAAGGCCTTCGGGTTGTAAAGCCCTTTTGTTGGGAAAGAAATC…	1410	Pseudomonadota	Gammaproteobacteria	Xanthomonadales	Xanthomonadaceae	Stenotrophomonas	Stenotrophomonas pavanii	2528	99.79	Stenotrophomonas pavanii	Stenotrophomonas	375	OTU34	OTU34	0	100	None
L1-2CT-I	MT355353	U79	Control/Healthy Silks	L	CO441	T	27F	2	0.00141844	TGCAGTCGAACGGCAGCACAGGAGAGCTTGCTCTCTGGGTGGCGAGTGGCGGACGGGTGAGGAATACATCGGAATCTACTCTGTCGTGGGGGATAACGTAGGGAAACTTACGCTAATACCGCATACGACCTACGGGTGAAAGCAGGGGANCTTCGGGCCTTGCGCGATTGAATGAGCCGATGTCGGATTAGCTAGTTGGCGGGGTAAAGGCCCACCAAGGCGACGATCCGTAGCTGGTCTGAGAGGATGATCAGCCACACTGGAACTGAGACACGGTCCAGACTCCTACGGGAGGCAGCAGTGGGGAATATTGGACAATGGGCGCAAGCCTGATCCAGCCATACCGCGTGGGTGAAGAAGGCCTTCGGGTTGTAAAGCCCTTTTGTTGGGAAAGAAATC…	1410	Pseudomonadota	Gammaproteobacteria	Xanthomonadales	Xanthomonadaceae	Stenotrophomonas	Stenotrophomonas pavanii	2521	99.72	Stenotrophomonas pavanii	Stenotrophomonas	375	OTU34	OTU34	0	100	None
P1-12CT-H	OM164545	V08	Control/Healthy Silks	P	CO448	T	27F	3	0.00213675	CGGCAGCACAGGAGAGCTTGCTCTCTGGGTGGCGAGTGGCGGACGGGTGAGGAATACATCGGAATCTACTCTGTCGTGGGGGATAACGTAGGGAAACTTACGCTAATACCGCATACGACCTACGGGTGAAAGCAGGGGANCTTCGGGCCTTGCGCGATTGAATGAGCCGATGTCGGATTAGCTAGTTGGCGGGGTAAAGGCCCACCAAGGCGACGATCCGTAGCTGGTCTGAGAGGATGATCAGCCACACTGGAACTGAGACACGGTCCAGACTCCTACGGGAGGCAGCAGTGGGGAATATTGGACAATGGGCGCAAGCCTGATCCAGCCATACCGCGTGGGTGAAGAAGGCCTTCGGGTTGTAAAGCCCTTTTGTTGGGAAAGAAATCCAGCTGGCTA…	1404	Pseudomonadota	Gammaproteobacteria	Xanthomonadales	Xanthomonadaceae	Stenotrophomonas	Stenotrophomonas pavanii	2504	99.64	Stenotrophomonas pavanii	Stenotrophomonas	375	OTU34	0	OTU34	99.61	1 N mismatch
P1-17ET-S1Y	OM240978	B17	Experimental/Fg-treated Silks	P	P35837	T	27F	7	0.00719424	TGCAGTCGAACGGCAGCACAGGAGAGCTTGCTCTCTGGGTGGCGAGTGGCGGACGGGTGAGGAATACATCGGAATCTACTCTGTCGTGGGGGATAACGTAGGGAAACTTACGCTAATACCGCATACGACCTACGGGTGAAAGCAGGGGATCTTCGGGCCTTGCGCGATTGAATGAGCCGATGTCGGATTAGCTAGTTGGCGGGGTAAAGGCCCACCAAGGCGACGATCCGTAGCTGGTCTGAGAGGATGATCAGCCACACTGGAACTGAGACACGGTCCAGACTCCTACGGGAGGCAGCAGTGGGGAATATTGGACAATGGGCGCAAGCCTGATCCAGCCATACCGCGTGGGTGAAGAAGGCCTTCGGGTTGTAAAGCCCTTTTGTTGGGAAAGAAATC…	973	Pseudomonadota	Gammaproteobacteria	Xanthomonadales	Xanthomonadaceae	Stenotrophomonas	Stenotrophomonas pavanii	1707	98.87	Stenotrophomonas pavanii	Stenotrophomonas	367&368&370&375	OTU34	0	OTU34	99.21	2 N mismatches
L1-17EB-Y	OM164203	G20	Experimental/Fg-treated Silks	L	P35837	B	27F	0	0	CATGCAGTCGAACGGCAGCACAGGAGAGCTTGCTCTCTGGGTGGCGAGTGGCGGACGGGTGAGGAATACATCGGAATCTACTCTGTCGTGGGGGATAACGTAGGGAAACTTACGCTAATACCGCATACGACCTACGGGTGAAAGCAGGGGATCTTCGGGCCTTGCGCGATTGAATGAGCCGATGTCGGATTAGCTAGTTGGCGGGGTAAAGGCCCACCAAGGCGACGATCCGTAGCTGGTCTGAGAGGATGATCAGCCACACTGGAACTGAGACACGGTCCAGACTCCTACGGGAGGCAGCAGTGGGGAATATTGGACAATGGGCGCAAGCCTGATCCAGCCATACCGCGTGGGTGAAGAAGGCCTTCGGGTTGTAAAGCCCTTTTGTTGGGAAAGAAA…	1412	Pseudomonadota	Gammaproteobacteria	Xanthomonadales	Xanthomonadaceae	Stenotrophomonas	Stenotrophomonas pavanii	2531	99.72	Stenotrophomonas pavanii	Stenotrophomonas	375	OTU34	OTU34	0	100	None
L1-11ET-F	OM164261	L41	Experimental/Fg-treated Silks	L	CO452	T	27F	10	0.00705219	CATGCAGTCGAACGGCAGCACANAGAGAGCTTGCTCTCTGGGTGGCGAGTGGCGGACGGGTGAGGAATACATCGGAATCTACTCTGTCGTGGGGGATAACGTAGGGAAACTTACGCTAATACCGCATACGACCTACGGGTGAAAGCAGGGGANCTTCGGNCNTTGCGCGATTGAATGAGCCGATGTCGGATTAGCTAGTTGGCGGGGTAAAGGCCCACCAAGGCGACGATCCGTAGCTGGTCTGAGAGGATGATCAGCCACACTGGAACTGAGACACGGTCCAGACTCCTACGGGAGGCAGCAGTGGGGAATATTGGACAATGGGCGCAAGCCTGATCCAGCCATACCGCGTGGGTGAAGAAGGCCTTCGGGTTGTAAAGCCCTTTTGTTGGGAAAGAA…	1418	Pseudomonadota	Gammaproteobacteria	Xanthomonadales	Xanthomonadaceae	Stenotrophomonas	Stenotrophomonas pavanii	2470	98.87	Stenotrophomonas pavanii	Stenotrophomonas	374&375	OTU34	OTU34	0	100	None
L1-2EB-D	OM164262	L42	Experimental/Fg-treated Silks	L	CO441	B	27F	8	0.00589102	AGCTTGANTCTCTGGGTGGCGAGTGGCGGACGGGTGAGGAATACATCGGAATCTACTCTGTCGTGGGGGATAACGTAGGGAAACTTACGCTAATACCGCATACGACCTACGGGTGAAAGCAGGGGANCTTCNGNCNTTGCGCGATTGAATGAGCCGATGTCGGATTAGCTAGTTGGCGGGGTAAAGGCCCACCAAGGCGACGATCCGTAGCTGGTCTGAGAGGATGATCAGCCACACTGGAACTGAGACACGGTCCAGACTCCTACGGGAGGCAGCAGTGGGGAATATTGGACAATGGGCGCAAGCCTGATCCAGCCATACCGCGTGGGTGAAGAAGGCCTTCGGGTTGTAAAGCCCTTTTGTTGGGAAAGAAATCCAGCTGGCTAATACCCNGGTTGG…	1358	Pseudomonadota	Gammaproteobacteria	Xanthomonadales	Xanthomonadaceae	0	0	2444	99.04	Stenotrophomonas pavanii	Stenotrophomonas	370	OTU34	0	OTU34	99.61	1 N(space) mismatch
L1-11ET-I	OM164263	L43	Experimental/Fg-treated Silks	L	CO452	T	27F	16	0.0112518	ATGCAGTCGAACGGCAGNCACANANAGAGCTTGCNCTCTGGGTGGCGAGTGGCGGACGGGTGAGGAATACATCGGAATCTACTCTGTCGTGGGGGATAACGTAGGGAAACTTACGCTAATACCGCATACGACCTACGGGTGAAAGCAGGGGANCTTCGGGCCTTGCGCGATTGAATGAGCCGATGTCGGATTAGCTAGTTGGCGGGGTAAAGGCCCACCAAGGCGACGATCCGTAGCTGGTCTGAGAGGATGATCAGCCACACTGGAACTGAGACACGGTCCAGACTCCTACGGGAGGCAGCAGTGGGGAATATTGGACAATGGGCGCAAGCCTGATCCAGCCATACCGCGTGGGTGAAGAAGGCCTTCGGGTTGTAAAGCCCTTTTGTTGGGAAAGAA…	1422	Pseudomonadota	Gammaproteobacteria	Xanthomonadales	Xanthomonadaceae	Stenotrophomonas	Stenotrophomonas pavanii	2443	98.45	Stenotrophomonas pavanii	Stenotrophomonas	373	OTU34	0	OTU34	98.82	3 N(space) mismatches
L1-12ET-D	OM164265	L47	Experimental/Fg-treated Silks	L	CO448	T	27F	13	0.00917431	ATGCNAGTCGAACGGCAGCACANAGAGAGCTTGCTCTCTGGGTGGCGAGTGGCGGACGGGTGAGGAATACATCGGAATCTACTCTGTCGTGGGGGATAACGTAGGGAAACTTACGCTAATACCGCATACGACCTACGGGTGAAAGCAGGGGANCTTCNGNCNTTGCGCGATTGAATGAGCCGATGTCGGATTAGCTAGTTGGCGGGGTAAAGGCCCACCAAGGCGACGATCCGTAGCTGGTCTGAGAGGATGATCAGCCACACTGGAACTGAGACACGGTCCAGACTCCTACGGGAGGCAGCAGTGGGGAATATTGGACAATGGGCGCAAGCCTGATCCAGCCATACCGCGTGGGTGAAGAAGGCCTTCGGGTTGTAAAGCCCTTTTGTTGGGAAAGAA…	1417	Pseudomonadota	Gammaproteobacteria	Xanthomonadales	Xanthomonadaceae	Stenotrophomonas	Stenotrophomonas pavanii	2536	98.8	Stenotrophomonas pavanii	Stenotrophomonas	374&375	OTU34	OTU34	0	100	None
L1-11ET-E	OM241007	L48	Experimental/Fg-treated Silks	L	CO452	T	27F	17	0.0172239	ATGCAGTCGAACGGCAGCACAGNGAGAGCTTGCTCTCTGGGTGGCGAGTGGCGGACGGGTGAGGAATACATCGGAATCTACTCTGTCGTGGGGGATAACGTAGGGAAACTTACGCTAATACCGCATACGACCTACGGGTGAAAGCAGGGGANCTTCGGGCCTTGCGCGATTGAATGAGCCGATGTCGGATTAGCTAGTTGGCGGGGTAAAGGCCCACCAAGGCGACGATCCGTAGCTGGTCTGAGAGGATGATCAGCCACACTGGAACTGAGACACGGTCCAGACTCCTACGGGAGGCAGCAGTGGGGAATATTGGACAATGGGCGCAAGCCTGATCCAGCCATACCGCGTGGGTGAAGAAGGCCTTCGGGTTGTAAAGCCCTTTTGTTGGGAAAGAAA…	987	Pseudomonadota	Gammaproteobacteria	Xanthomonadales	Xanthomonadaceae	0	0	1699	97.98	Stenotrophomonas pavanii	Stenotrophomonas	367&370&375	OTU34	0	OTU34	99.61	1 N mismatch
L1-3ET-E	OM164267	L54	Experimental/Fg-treated Silks	L	CO433	T	27F	4	0.00282287	ATGCAGTCGAACGGCAGCACANAGAGAGCTTGCTCTCTGGGTGGCGAGTGGCGGACGGGTGAGGAATACATCGGAATCTACTCTGTCGTGGGGGATAACGTAGGGAAACTTACGCTAATACCGCATACGACCTACGGGTGAAAGCAGGGGANCTTCGGGCCTTGCGCGATTGAATGAGCCGATGTCGGATTAGCTAGTTGGCGGGGTAAAGGCCCACCAAGGCGACGATCCGTAGCTGGTCTGAGAGGATGATCAGCCACACTGGAACTGAGACACGGTCCAGACTCCTACGGGAGGCAGCAGTGGGGAATATTGGACAATGGGCGCAAGCCTGATCCAGCCATACCGCGTGGGTGAAGAAGGCCTTCGGGTTGTAAAGCCCTTTTGTTGGGAAAGAAA…	1417	Pseudomonadota	Gammaproteobacteria	Xanthomonadales	Xanthomonadaceae	Stenotrophomonas	Stenotrophomonas pavanii	2567	99.3	Stenotrophomonas pavanii	Stenotrophomonas	375	OTU34	OTU34	0	100	None
P1-2ET-S	OM164268	L55	Experimental/Fg-treated Silks	P	CO441	T	27F	3	0.0021322	TGCAGTCGAACGGCAGCACAGGAGAGCTTGCTCTCTGGGTGGCGAGTGGCGGACGGGTGAGGAATACATCGGAATCTACTCTGTCGTGGGGGATAACGTAGGGAAACTTACGCTAATACCGCATACGACCTACGGGTGAAAGCAGGGGATCTTCGGGCCTTGCGCGATTGAATGAGCCGATGTCGGATTAGCTAGTTGGCGGGGTAAAGGCCCACCAAGGCGACGATCCGTAGCTGGTCTGAGAGGATGATCAGCCACACTGGAACTGAGACACGGTCCAGACTCCTACGGGAGGCAGCAGTGGGGAATATTGGACAATGGGCGCAAGCCTGATCCAGCCATACCGCGTGGGTGAAGAAGGCCTTCGGGTTGTAAAGCCCTTTTGTTGGGAAAGAAATC…	1407	Pseudomonadota	Gammaproteobacteria	Xanthomonadales	Xanthomonadaceae	Stenotrophomonas	Stenotrophomonas pavanii	2507	99.5	Stenotrophomonas pavanii	Stenotrophomonas	367	OTU34	OTU34	re-sequenced, check with new sequence	100	None
P1-3ET-F	OM164269	L57	Experimental/Fg-treated Silks	P	CO433	T	27F	9	0.00644699	TGCAGTCGAACGGCAGCACAGGAGAGCTTGCTCTCTGGGTGGCGAGTGGCGGACGGGTGAGGAATACATCGGAATCTACTCTGTCGTGGGGGATAACGTAGGGAAACTTACGCTAATACCGCATACGACCTACGGGTGAAAGCAGGGGATCTTCGGACCTTGCGCGATTGAATGAGCCGATGTCGGATTAGCTAGTTGGCGGGGTAAAGGCCCACCAAGGCGACGATCCGTAGCTGGTCTGAGAGGATGATCAGCCACACTGGAACTGAGACACGGTCCAGACTCCTACGGGAGGCAGCAGTGGGGAATATTGGACAATGGGCGCAAGCCTGATCCAGCCATACCGCGTGGGTGAAGAAGGCCTTCGGGTTGTAAAGCCCTTTTGTTGGGAAAGAAATC…	1396	Pseudomonadota	Gammaproteobacteria	Xanthomonadales	Xanthomonadaceae	Stenotrophomonas	0	2434	98.64	Stenotrophomonas pavanii and Stenotrophomonas maltophilia	Stenotrophomonas	364	OTU34	0	OTU34	98.82	3 N mismatches
P1-12ET-D	MT355347	L63	Experimental/Fg-treated Silks	P	CO448	T	27F	2	0.00141443	ATGCAGTCGAACGGCAGCACAGGAGAGCTTGCTCTCTGGGTGGCGAGTGGCGGACGGGTGAGGAATACATCGGAATCTACTCTGTCGTGGGGGATAACGTAGGGAAACTTACGCTAATACCGCATACGACCTACGGGTGAAAGCAGGGGANCTTCGGGCCTTGCGCGATTGAATGAGCCGATGTCGGATTAGCTAGTTGGCGGGGTAAAGGCCCACCAAGGCGACGATCCGTAGCTGGTCTGAGAGGATGATCAGCCACACTGGAACTGAGACACGGTCCAGACTCCTACGGGAGGCAGCAGTGGGGAATATTGGACAATGGGCGCAAGCCTGATCCAGCCATACCGCGTGGGTGAAGAAGGCCTTCGGGTTGTAAAGCCCTTTTGTTGGGAAAGAAAT…	1414	Pseudomonadota	Gammaproteobacteria	Xanthomonadales	Xanthomonadaceae	Stenotrophomonas	Stenotrophomonas pavanii	2586	99.65	Stenotrophomonas pavanii	Stenotrophomonas	375	OTU34	OTU34	0	100	none
L1-2ET-B	OM164278	M28	Experimental/Fg-treated Silks	L	CO441	T	27F	5	0.00353857	TGCAGTCGNACGGCAGCACAGGAGAGCTTGCTCTCTGGGTGGCGAGTGGCGGACGGGTGAGGAATACATCGGAATCTACTCTGTCGTGGGGGATAACGTAGGGAAACTTACGCTAATACCGCATACGACCTACGGGTGAAAGCAGGGGANCTTCGGACCTTGCGCGATTGAATGAGCCGATGTCGGATTAGCTAGTTGGCGGGGTAAAGGCCCACCAAGGCGACGATCCGTAGCTGGTCTGAGAGGATGATCAGCCACACTGGAACTGAGACACGGTCCAGACTCCTACGGGAGGCAGCAGTGGGGAATATTGGACAATGGGCGCAAGCCTGATCCAGCCATACCGCGTGGGTGAAGAAGGCCTTCGGGTTGTAAAGCCCTTTTGTTGGGAAAGAAATC…	1413	Pseudomonadota	Gammaproteobacteria	Xanthomonadales	Xanthomonadaceae	Stenotrophomonas	Stenotrophomonas pavanii	2569	99.29	Stenotrophomonas pavanii	Stenotrophomonas	374	OTU34	0	OTU34	99.21	2 N mismatches
P1-19ET-B	OM164296	N38	Experimental/Fg-treated Silks	P	P9855HR	T	27F	0	0	TGCAGTCGAACGGCAGCACAGGAGAGCTTGCTCTCTGGGTGGCGAGTGGCGGACGGGTGAGGAATACATCGGAATCTACTCTGTCGTGGGGGATAACGTAGGGAAACTTACGCTAATACCGCATACGACCTACGGGTGAAAGCAGGGGATCTTCGGGCCTTGCGCGATTGAATGAGCCGATGTCGGATTAGCTAGTTGGCGGGGTAAAGGCCCACCAAGGCGACGATCCGTAGCTGGTCTGAGAGGATGATCAGCCACACTGGAACTGAGACACGGTCCAGACTCCTACGGGAGGCAGCAGTGGGGAATATTGGACAATGGGCGCAAGCCTGATCCAGCCATACCGCGTGGGTGAAGAAGGCCTTCGGGTTGTAAAGCCCTTTTGTTGGGAAAGAAATC…	1412	Pseudomonadota	Gammaproteobacteria	Xanthomonadales	Xanthomonadaceae	Stenotrophomonas	Stenotrophomonas pavanii	2528	99.79	Stenotrophomons pavanii	Stenotrophomonas	375	OTU34	OTU34	0	100	None
P1-19ET-R	OM164297	N39	Experimental/Fg-treated Silks	P	P9855HR	T	27F	2	0.00146843	AGAGCTTGCTCTCTGGGTGGCGAGTGGCGGACGGGTGAGGAATACATCGGAATCTACTCTGTCGTGGGGGATAACGTAGGGAAACTTACGCTAATACCGCATACGACCTACGGGTGAAAGCAGGGGANCTTCGGACCTTGCGCGATTGAATGAGCCGATGTCGGATTAGCTAGTTGGCGGGGTAAAGGCCCACCAAGGCGACGATCCGTAGCTGGTCTGAGAGGATGATCAGCCACACTGGAACTGAGACACGGTCCAGACTCCTACGGGAGGCAGCAGTGGGGAATATTGGACAATGGGCGCAAGCCTGATCCAGCCATACCGCGTGGGTGAAGAAGGCCTTCGGGTTGTAAAGCCCTTTTGTTGGGAAAGAAATCCAGCTGGCTAATACCCGGTTGG…	1362	Pseudomonadota	Gammaproteobacteria	Xanthomonadales	Xanthomonadaceae	Stenotrophomonas	Stenotrophomonas pavanii	2492	99.63	Stenotrophomonas pavanii	Stenotrophomonas	374	OTU34	0	OTU34	99.61	1 N(space) mismatch
P1-19ET-F	OM164299	N44	Experimental/Fg-treated Silks	P	P9855HR	T	27F	5	0.00360231	AGAGCTTGCTCTCTGGGTGGCGAGTGGCGGACGGGTGAGGAATACATCGGAATCTACTCTGTCGTGGGGGATAACGTAGGGAAACTTACGCTAATACCGCATACGACCTACGGGTGAAAGCAGGGGANCTTCGGACCTTGCGCGATTGAATGAGCCGATGTCGGATTAGCTAGTTGGCGGGGTAAAGGCCCACCAAGGCGACGATCCGTAGCTGGTCTGAGAGGATGATCAGCCACACTGGAACTGAGACACGGTCCAGACTCCTACGGGAGGCAGCAGTGGGGAATATTGGACAATGGGCGCAAGCCTGATCCAGCCATACCGCGTGGGTGAAGAAGGCCTTCGGGTTGTAAAGCCCTTTTGTTGGGAAAGAAATCCAGCTGGCTAATACCCGGTTGG…	1388	Pseudomonadota	Gammaproteobacteria	Xanthomonadales	Xanthomonadaceae	Stenotrophomonas	Stenotrophomonas pavanii	2529	99.42	Stenotrophomonas pavanii	Stenotrophomonas	374	OTU34	OTU34	0	100	None
P1-18ET-B	OM164300	N45	Experimental/Fg-treated Silks	P	P38157	T	27F	6	0.00441826	AGCTTGCTCTCTGGGTGGCGAGTGGCGGACGGGTGAGGAATACATCGGAATCTACTCTGTCGTGGGGGATAACGTAGGGAAACTTACGCTAATACCGCATACGACCTACGGGTGAAAGCAGGGGANCTTCGGGCCTTGCGCGATTGAATGAGCCGATGTCGGATTAGCTAGTTGGCGGGGTAAAGGCCCACCAAGGCGACGATCCGTAGCTGGTCTGAGAGGATGATCAGCCACACTGGAACTGAGACACGGTCCAGACTCCTACGGGAGGCAGCAGTGGGGAATATTGGACAATGGGCGCAAGCCTGATCCAGCCATACCGCGTGGGTGAAGAAGGCCTTCGGGTTGTAAAGCCCTTTTGTTGGGAAAGAAATCCAGCTGGCTAATACCCGGTTGGGA…	1358	Pseudomonadota	Gammaproteobacteria	Xanthomonadales	Xanthomonadaceae	Stenotrophomonas	Stenotrophomonas pavanii	2464	99.41	Stenotrophomonas pavanii	Stenotrophomonas	375	OTU34	0	OTU34	99.61	1 N(space) mismatch
P1-17ET-D	OM164301	N46	Experimental/Fg-treated Silks	P	P35837	T	27F	1	0.000708215	TGCAGTCGAACGGCAGCACAGGAGAGCTTGCTCTCTGGGTGGCGAGTGGCGGACGGGTGAGGAATACATCGGAATCTACTCTGTCGTGGGGGATAACGTAGGGAAACTTACGCTAATACCGCATACGACCTACGGGTGAAAGCAGGGGATCTTCGGACCTTGCGCGATTGAATGAGCCGATGTCGGATTAGCTAGTTGGCGGGGTAAAGGCCCACCAAGGCGACGATCCGTAGCTGGTCTGAGAGGATGATCAGCCACACTGGAACTGAGACACGGTCCAGACTCCTACGGGAGGCAGCAGTGGGGAATATTGGACAATGGGCGCAAGCCTGATCCAGCCATACCGCGTGGGTGAAGAAGGCCTTCGGGTTGTAAAGCCCTTTTGTTGGGAAAGAAATC…	1412	Pseudomonadota	Gammaproteobacteria	Xanthomonadales	Xanthomonadaceae	Stenotrophomonas	0	2520	99.64	Stenotrophomonas pavanii and Stenotrophomonas maltophilia	Stenotrophomonas	374	OTU34	OTU34	0	100	None
L1-1EB-F	OM240980	N55	Experimental/Fg-treated Silks	L	CO449	B	27F	35	0.0333016	TGCAGTCGAACGGCAGCACAGGAGAGCTTGCTCTCTGGGTGGCGAGTGGCGGACGGGTGAGGAATACATCGGAATCTACTCTGTCGTGGGGGATAACGTAGGGAAACTTACGCTAATACCGCATACGACCTACGGGTGAAAGCAGGGGATCTTCGGGCCTTGCGCGATTGAATGAGCCGATGTCGGATTAGCTAGTTGGCGGGGTAAAGGCCCACCAAGGCGACGATCCGTAGCTGGTCTGAGAGGATGATCAGCCACACTGGAACTGAGACACGGTCCAGACTCCTACGGGAGGCAGCAGTGGGGAATATTGGACAATGGGCGCAAGCCTGATCCAGCCATACCGCGTGGGTGAAGAAGGCCTTCGGGTTGTAAAGCCCTTTTGTTGGGAAAGAAATC…	1051	Pseudomonadota	Gammaproteobacteria	Xanthomonadales	Xanthomonadaceae	0	0	1738	96.54	Stenotrophomonas pavanii	Stenotrophomonas	367&368&375	OTU34	0	OTU34	98.43	4 N mismatches
L1-19EB-B	OM241040	N64	Experimental/Fg-treated Silks	L	P9855HR	B	27F	32	0.0307692	GCGCCCTCCCGAAGGNTAAGCTNNNNGCTTCTGGTGCAACAAACTCCCATGGTGTGACGGGCGGTGTGTACAAGGCCCGGGAACGTATTCACCGCAGCAATGCTGATCTGCGATTACTAGCGATTCCGACTTCATGGAGTCGAGTTGCAGACTCCAATCCGGACTGAGATAGGGTTTCTGGGATTGGCTTACCGTCGCCGGCTTGCAGCCCTCTGTCCCTACCATTGTAGTACGTGTGTAGCCCTGGCCGTAAGGGCCATGATGACTTGACGTCATCCCCACCTTCCTCCGGTTTGTCACCGGCGGTCTCCTTAGAGTTCCCACCATTACGTGCTGGCAACTAAGGACAAGGGTTGCGCTCGTTGCGGGACTTAACCCAACATCTCACGACACGAGCTG…	1040	Pseudomonadota	Gammaproteobacteria	Xanthomonadales	Xanthomonadaceae	Stenotrophomonas	0	1728	96.45	Stenotrophomonas maltophilia	Stenotrophomonas	374&375	OTU34	0	OTU34	96.46	8 N mismatches, 1 non-N mismatch (space)
L1-6EB-D	OM164314	N68	Experimental/Fg-treated Silks	L	CO430	B	27F	3	0.00212615	CATGCAGTCGNACGGCAGCACAGGAGAGCTTGCTCTCTGGGTGGCGAGTGGCGGACGGGTGAGGAATACATCGGAATCTACTCTGTCGTGGGGGATAACGTAGGGAAACTTACGCTAATACCGCATACGACCTACGGGTGAAAGCAGGGGATCTTCGGGCCTTGCGCGATTGAATGAGCCGATGTCGGATTAGCTAGTTGGCGGGGTAAAGGCCCACCAAGGCGACGATCCGTAGCTGGTCTGAGAGGATGATCAGCCACACTGGAACTGAGACACGGTCCAGACTCCTACGGGAGGCAGCAGTGGGGAATATTGGACAATGGGCGCAAGCCTGATCCAGCCATACCGCGTGGGTGAAGAAGGCCTTCGGGTTGTAAAGCCCTTTTGTTGGGAAAGAAA…	1411	Pseudomonadota	Gammaproteobacteria	Xanthomonadales	Xanthomonadaceae	Stenotrophomonas	Stenotrophomonas pavanii	2512	99.43	Stenotrophomonas pavanii	Stenotrophomonas	375	OTU34	OTU34	0	100	None
P1-5EB-O	OM164342	O36	Experimental/Fg-treated Silks	P	CO431	B	27F	4	0.00282885	ATGCAGTCGAACGGCAGCACAGNGAGAGCTTGCTCTCTGGGTGGCGAGTGGCGGACGGGTGAGGAATACATCGGAATCTACTCTGTCGTGGGGGATAACGTAGGGAAACTTACGCTAATACCGCATACGACCTACGGGTGAAAGCAGGGGANCTTCGGNCCTTGCGCGATTGAATGAGCCGATGTCGGATTAGCTAGTTGGCGGGGTAAAGGCCCACCAAGGCGACGATCCGTAGCTGGTCTGAGAGGATGATCAGCCACACTGGAACTGAGACACGGTCCAGACTCCTACGGGAGGCAGCAGTGGGGAATATTGGACAATGGGCGCAAGCCTGATCCAGCCATACCGCGTGGGTGAAGAAGGCCTTCGGGTTGTAAAGCCCTTTTGTTGGGAAAGAAA…	1414	Pseudomonadota	Gammaproteobacteria	Xanthomonadales	Xanthomonadaceae	Stenotrophomonas	Stenotrophomonas pavanii	2577	99.5	Stenotrophomonas pavanii	Stenotrophomonas	374&375	OTU34	OTU34	0	100	None
L1-19EB-C	OM240975	O49	Experimental/Fg-treated Silks	L	P9855HR	B	27F	12	0.012487	CGGCAGCACAGGAGAGCTTGCTCTCTGGGTGGCGAGTGGCGGACGGGTGAGGAATACATCGGAATCTACTCTGTCGTGGGGGATAACGTAGGGAAACTTACGCTAATACCGCATACGACCTACGGGTGAAAGCAGGGGATCTTCGGGCCTTGCGCGATTGAATGAGCCGATGTCGGATTAGCTAGTTGGCGGGGTAAAGGCCCACCAAGGCGACGATCCGTAGCTGGTCTGAGAGGATGATCAGCCACACTGGAACTGAGACACGGTCCAGACTCCTACGGGAGGCAGCAGTGGGGAATATTGGACAATGGGCGCAAGCCTGATCCAGCCATACCGCGTGGGTGAAGAAGGCCTTCGGGTTGTAAAGCCCTTTTGTTGGGAAAGAAATCCAGCTGGCTA…	961	Pseudomonadota	Gammaproteobacteria	Xanthomonadales	Xanthomonadaceae	0	0	1666	98.23	Stenotrophomonas pavanii	Stenotrophomonas	367&368&370&375	OTU34	0	OTU34	99.21	2 N mismatches
L1-1EB-E	OM164348	O52	Experimental/Fg-treated Silks	L	CO449	B	27F	1	0.000708215	TGCAGTCGAACGGCAGCACAGGAGAGCTTGCTCTCTGGGTGGCGAGTGGCGGACGGGTGAGGAATACATCGGAATCTACTCTGTCGTGGGGGATAACGTAGGGAAACTTACGCTAATACCGCATACGACCTACGGGTGAAAGCAGGGGATCTTCGGGCCTTGCGCGATTGAATGAGCCGATGTCGGATTAGCTAGTTGGCGGGGTAAAGGCCCACCAAGGCGACGATCCGTAGCTGGTCTGAGAGGATGATCAGCCACACTGGAACTGAGACACGGTCCAGACTCCTACGGGAGGCAGCAGTGGGGAATATTGGACAATGGGCGCAAGCCTGATCCAGCCATACCGCGTGGGTGAAGAAGGCCTTCGGGTTGTAAAGCCCTTTTGTTGGGAAAGAAATC…	1412	Pseudomonadota	Gammaproteobacteria	Xanthomonadales	Xanthomonadaceae	Stenotrophomonas	Stenotrophomonas pavanii	2525	99.72	Stenotrophomonas pavanii	Stenotrophomonas	375	OTU34	OTU34	0	100	None
L1-5EB-H	OM164358	O69	Experimental/Fg-treated Silks	L	CO431	B	27F	1	0.000707214	CATGCAGTCGAACGGCAGCACAGGAGAGCTTGCTCTCTGGGTGGCGAGTGGCGGACGGGTGAGGAATACATCGGAATCTACTCTGTCGTGGGGGATAACGTAGGGAAACTTACGCTAATACCGCATACGACCTACGGGTGAAAGCAGGGGATCTTCNGGCCTTGCGCGATTGAATGAGCCGATGTCGGATTAGCTAGTTGGCGGGGTAAAGGCCCACCAAGGCGACGATCCGTAGCTGGTCTGAGAGGATGATCAGCCACACTGGAACTGAGACACGGTCCAGACTCCTACGGGAGGCAGCAGTGGGGAATATTGGACAATGGGCGCAAGCCTGATCCAGCCATACCGCGTGGGTGAAGAAGGCCTTCGGGTTGTAAAGCCCTTTTGTTGGGAAAGAAA…	1414	Pseudomonadota	Gammaproteobacteria	Xanthomonadales	Xanthomonadaceae	Stenotrophomonas	Stenotrophomonas pavanii	2527	99.65	Stenotrophomonas pavanii	Stenotrophomonas	375	OTU34	OTU34	0	100	None
L1-5ET-J	MT355351	Q63	Experimental/Fg-treated Silks	L	CO431	T	27F	0	0	TGCAGTCGAACGGCAGCACAGGAGAGCTTGCTCTCTGGGTGGCGAGTGGCGGACGGGTGAGGAATACATCGGAATCTACTCTGTCGTGGGGGATAACGTAGGGAAACTTACGCTAATACCGCATACGACCTACGGGTGAAAGCAGGGGATCTTCGGGCCTTGCGCGATTGAATGAGCCGATGTCGGATTAGCTAGTTGGCGGGGTAAAGGCCCACCAAGGCGACGATCCGTAGCTGGTCTGAGAGGATGATCAGCCACACTGGAACTGAGACACGGTCCAGACTCCTACGGGAGGCAGCAGTGGGGAATATTGGACAATGGGCGCAAGCCTGATCCAGCCATACCGCGTGGGTGAAGAAGGCCTTCGGGTTGTAAAGCCCTTTTGTTGGGAAAGAAATC…	1410	Pseudomonadota	Gammaproteobacteria	Xanthomonadales	Xanthomonadaceae	Stenotrophomonas	Stenotrophomonas pavanii	2528	99.79	Stenotrophomonas pavanii	Stenotrophomonas	375	OTU34	OTU34	0	100	None
P1-4ET-E	OM241037	R18	Experimental/Fg-treated Silks	P	CO432	T	27F	23	0.0219885	AGCGCCCTCCCGAAGGTTAAGCTACCTGCTTCTGGTGCAACAAACTCCCATGGTGTGACGGGCGGTGTGTACAAGGCCCGGGAACGTATTCACCGCAGCAATGCTGATCTGCGATTACTAGCGATTCCGACTTCATGGAGTCGAGTTGCAGACTCCAATCCGGACTGAGATAGGGTTTCTGGGATTGGCTTACCGTCGCCGGCTTGCAGCCCTCTGTCCCTACCATTGTAGTACGTGTGTAGCCCTGGCCGTAAGGGCCATGATGACTTGACGTCATCCCCACCTTCCTCCGGTTTGTCACCGGCGGTCTCCTTAGAGTTCCCACCATTACGTGCTGGCAACTAAGGACAAGGGTTGCGCTCGTTGCGGGACTTAACCCAACATCTCACGACACGAGCT…	1046	Pseudomonadota	Gammaproteobacteria	Xanthomonadales	Xanthomonadaceae	Stenotrophomonas	0	1794	98.35	Stenotrophomonas pavanii	Stenotrophomonas	375	OTU34	0	OTU34	99.61	1 N mismatch
P1-5ET-B	OM164426	R19	Experimental/Fg-treated Silks	P	CO431	T	27F	3	0.00221076	AGCTTGCTCTCTGGGTGGCGAGTGGCGGACGGGTGAGGAATACATCGGAATCTACTCTGTCGTGGGGGATAACGTAGGGAAACTTACGCTAATACCGCATACGACCTACGGGTGAAAGCAGGGGANCTTCNGNCCTTGCGCGATTGAATGAGCCGATGTCGGATTAGCTAGTTGGCGGGGTAAAGGCCCACCAAGGCGACGATCCGTAGCTGGTCTGAGAGGATGATCAGCCACACTGGAACTGAGACACGGTCCAGACTCCTACGGGAGGCAGCAGTGGGGAATATTGGACAATGGGCGCAAGCCTGATCCAGCCATACCGCGTGGGTGAAGAAGGCCTTCGGGTTGTAAAGCCCTTTTGTTGGGAAAGAAATCCAGCTGGCTAATACCCGGTTGGGA…	1357	Pseudomonadota	Gammaproteobacteria	Xanthomonadales	Xanthomonadaceae	Stenotrophomonas	Stenotrophomonas pavanii	2488	99.63	Stenotrophomonas pavanii	Stenotrophomonas	374&375	OTU34	OTU34	0	100	None
P1-18ET-L	MT355331	S15	Experimental/Fg-treated Silks	P	P38157	T	27F	30	0.0283554	CNCNTGCNAGTCGAACGGCAGCACAGGAGAGCTTGCTCTCTGGGTGGCGAGTGGCGGACGGGTGAGGAATACATCGGAATCTACTCTGTCGTGGGGGATAACGTAGGGAAACTTACGCTAATACCGCATACGACCTACGGGTGAAAGCAGGGGATCTTCNGGCCTTGCGCGATTGAATGAGCCGATGTCGGATTAGCTAGTTGGCGGGGTAAAGGCCCACCAAGGCGACGATCCGTAGCTGGTCTGAGAGGATGATCAGCCACACTGGAACTGAGACACGGTCCAGACTCCTACGGGAGGCAGCAGTGGGGAATATTGGACAATGGGCGCAAGCCTGATCCAGCCATACCGCGTGGGTGAAGAAGGCCTTCGGGTTGTAAAGCCCTTTTGTTGGGAAAG…	1058	Pseudomonadota	Gammaproteobacteria	Xanthomonadales	Xanthomonadaceae	Stenotrophomonas	Stenotrophomonas pavanii	1524	99.28	Stenotrophomonas pavanii	Stenotrophomonas	367&368&370&375	OTU34	0	OTU34	99.21	2 N mismatches
P1-18ET-E	MT355332	S16	Experimental/Fg-treated Silks	P	P38157	T	27F	8	0.00813008	AGTCGAACGGCAGCACAGGAGAGCTTGCTCTCTGGGTGGCGAGTGGCGGACGGGTGAGGAATACATCGGAATCTACTCTGTCGTGGGGGATAACGTAGGGAAACTTACGCTAATACCGCATACGACCTACGGGTGAAAGCAGGGGANCTTCGGACCTTGCGCGATTGAATGAGCCGATGTCGGATTAGCTAGTTGGCGGGGTAAAGGCCCACCAAGGCGACGATCCGTAGCTGGTCTGAGAGGATGATCAGCCACACTGGAACTGAGACACGGTCCAGACTCCTACGGGAGGCAGCAGTGGGGAATATTGGACAATGGGCGCAAGCCTGATCCAGCCATACCGCGTGGGTGAAGAAGGCCTTCGGGTTGTAAAGCCCTTTTGTTGGGAAAGAAATCCAG…	984	Pseudomonadota	Gammaproteobacteria	Xanthomonadales	Xanthomonadaceae	Stenotrophomonas	0	1762	98.68	Stenotrophomonas pavanii	Stenotrophomonas	368&374	OTU34	0	OTU34	99.61	1 N mismatch
L1-18ET-I	OM164477	S66	Experimental/Fg-treated Silks	L	P38157	T	27F	1	0.000708717	AGCGCCCTCCCGAAGGNTAAGCTACCTGCTTCTGGTGCAACAAACTCCCATGGTGTGACGGGCGGTGTGTACAAGGCCCGGGAACGTATTCACCGCAGCAATGCTGATCTGCGATTACTAGCGATTCCGACTTCATGGAGTCGAGTTGCAGACTCCAATCCGGACTGAGATAGGGTTTCTGGGATTGGCTTACCGTCGCCGGCTTGCAGCCCTCTGTCCCTACCATTGTAGTACGTGTGTAGCCCTGGCCGTAAGGGCCATGATGACTTGACGTCATCCCCACCTTCCTCCGGTTTGTCACCGGCGGTCTCCTTAGAGTTCCCACCATTACGTGCTGGCAACTAAGGACAAGGGTTGCGCTCGTTGCGGGACTTAACCCAACATCTCACGACACGAGCT…	1411	Pseudomonadota	Gammaproteobacteria	Xanthomonadales	Xanthomonadaceae	Stenotrophomonas	Stenotrophomonas pavanii	2532	99.72	Stenotrophomonas pavanii	Stenotrophomonas	375	OTU34	OTU34	0	100	None
L1-19ET-D	OM164479	S70	Experimental/Fg-treated Silks	L	P9855HR	T	27F	7	0.00496102	TGCAGTCGAACGGCAGCACAGNGAGAGCTTGCTCTCTGGGTGGCGAGTGGCGGACGGGTGAGGAATACATCGGAATCTACTCTGTCGTGGGGGATAACGTAGGGAAACTTACGCTAATACCGCATACGACCTACGGGTGAAAGCAGGGGATCTTCGGGCCTTGCGCGATTGAATGAGCCGATGTCGGATTAGCTAGTTGGCGGGGTAAAGGCCCACCAAGGCGACGATCCGTAGCTGGTCTGAGAGGATGATCAGCCACACTGGAACTGAGACACGGTCCAGACTCCTACGGGAGGCAGCAGTGGGGAATATTGGACAATGGGCGCAAGCCTGATCCAGCCATACCGCGTGGGTGAAGAAGGCCTTCGGGTTGTAAAGCCCTTTTNGTTGGGAAAGAAA…	1411	Pseudomonadota	Gammaproteobacteria	Xanthomonadales	Xanthomonadaceae	Stenotrophomonas	Stenotrophomonas pavanii	2547	99.15	Stenotrophomonas pavanii	Stenotrophomonas	375	OTU34	OTU34	0	100	None
L1-18ET-D	MT355333	T09	Experimental/Fg-treated Silks	L	P38157	T	27F	15	0.0147348	AGTCGAACGGCAGCACAGGAGAGCTTGCTCTCTGGGTGGCGAGTGGCGGACGGGTGAGGAATACATCGGAATCTACTCTGTCGTGGGGGATAACGTAGGGAAACTTACGCTAATACCGCATACGACCTACGGGTGAAAGCAGGGGATCTTCGGACCNTGCGCGATTGAATGAGCCGATGTCGGATTAGCTAGTTGGCGGGGTAAAGGCCCACCAAGGCGACGATCCGTAGCTGGTCTGAGAGGATGATCAGCCACACTGGAACTGAGACACGGTCCAGACTCCTACGGGAGGCAGCAGTGGGGAATATTGGACAATGGGCGCAAGCCTGATCCAGCCATACCGCGTGGGTGAAGAAGGCCTTCGGGTTGTAAAGCCCTTTTGTTGGGAAAGAAATCCAG…	1018	Pseudomonadota	Gammaproteobacteria	Xanthomonadales	Xanthomonadaceae	Stenotrophomonas	0	1807	98.13	Stenotrophomonas pavanii	Stenotrophomonas	368&370&374	OTU34	0	OTU34	99.21	2 N mismatches
L1-13ET-N	OM164515	U18	Experimental/Fg-treated Silks	L	CO444	T	27F	12	0.00849858	TGCNAGTCGAACGGCAGCACAGNGAGAGCTTGCTCTCTGGGTGGCGAGTGGCGGACGGGTGAGGAATACATCGGAATCTACTCTGTCGTGGGGGATAACGTAGGGAAACTTACGCTAATACCGCATACGACCTACGGGTGAAAGCAGGGGATCTTCGGGCCTTGCGCGATTGAATGAGCCGATGTCGGATTAGCTAGTTGGCGGGGTAAAGGCCCACCAAGGCGACGATCCGTAGCTGGTCTGAGAGGATGATCAGCCACACTGGAACTGAGACACGGTCCAGACTCCTACGGGAGGCAGCAGTGGGGAATATTGGACAATGGGCGCAAGCCTGATCCAGCCATACCGCGTGGGTGAAGAAGGCCTTCGGGTTGTAAAGCCCTTTTGTTGGGAAAGAAA…	1412	Pseudomonadota	Gammaproteobacteria	Xanthomonadales	Xanthomonadaceae	Stenotrophomonas	Stenotrophomonas pavanii	2471	98.65	Stenotrophomonas pavanii	Stenotrophomonas	366	OTU34	OTU34	0	100	None
L1-13EB-G	MT355352	U21	Experimental/Fg-treated Silks	L	CO444	B	27F	5	0.00361011	TGCAGTCGNNCGGCAGCACANAGAGAGCTTGCTCTCTGGGTGGCGAGTGGCGGACGGGTGAGGAATACATCGGAATCTACTCTGTCGTGGGGGATAACGTAGGGAAACTTACGCTAATACCGCATACGACCTACGGGTGAAAGCAGGGGANCTTCGGGCCTTGCGCGATTGAATGAGCCGATGTCGGATTAGCTAGTTGGCGGGGTAAAGGCCCACCAAGGCGACGATCCGTAGCTGGTCTGAGAGGATGATCAGCCACACTGGAACTGAGACACGGTCCAGACTCCTACGGGAGGCAGCAGTGGGGAATATTGGACAATGGGCGCAAGCCTGATCCAGCCATACCGCGTGGGTGAAGAAGGCCTTCGGGTTGTAAAGCCCTTTTGTTGGGAAAGAAAT…	1385	Pseudomonadota	Gammaproteobacteria	Xanthomonadales	Xanthomonadaceae	Stenotrophomonas	Stenotrophomonas pavanii	2457	99.42	Stenotrophomonas pavanii	Stenotrophomonas	375	OTU34	OTU34	0	100	None
L1-13ET-B	MT355354	U81	Experimental/Fg-treated Silks	L	CO444	T	27F	5	0.00356125	CGGCAGCACAGNGAGAGCTTGCTCTCTGGGTGGCGAGTGGCGGACGGGTGAGGAATACATCGGAATCTACTCTGTCGTGGGGGATAACGTAGGGAAACTTACGCTAATACCGCATACGACCTACGGGTGAAAGCAGGGGANCTTCGGGCCTTGCGCGATTGAATGAGCCGATGTCGGATTAGCTAGTTGGCGGGGTAAAGGCCCACCAAGGCGACGATCCGTAGCTGGTCTGAGAGGATGATCAGCCACACTGGAACTGAGACACGGTCCAGACTCCTACGGGAGGCAGCAGTGGGGAATATTGGACAATGGGCGCAAGCCTGATCCAGCCATACCGCGTGGGTGAAGAAGGCCTTCGGGTTGTAAAGCCCTTTTGTTGGGAAAGAAATCCAGCTGGCT…	1404	Pseudomonadota	Gammaproteobacteria	Xanthomonadales	Xanthomonadaceae	Stenotrophomonas	Stenotrophomonas pavanii	2491	99.5	Stenotrophomonas pavanii	Stenotrophomonas	375	OTU34	OTU34	0	100	None
L1-13ET-I	MT355334	U85	Experimental/Fg-treated Silks	L	CO444	T	27F	35	0.0335249	ACGGCAGCACANNGAGAGCTTGCTCTCTGGGTGGCGAGTGGCGGACGGGTGAGGAATACATCGGAATCTACTCTGTCGTGGGGGATAACGTAGGGAAACTTACGCTAATACCGCATACGACCTACGGGTGAAAGCAGGGGATCTTCGGGCCTTGCGCGATTGAATGAGCCGATGTCGGATTAGCTAGTTGGCGGGGTAAAGGCCCACCAAGGCGACGATCCGTAGCTGGTCTGAGAGGATGATCAGCCACACTGGAACTGAGACACGGTCCAGACTCCTACGGGAGGCAGCAGTGGGGAATATTGGACAATGGGCGCAAGCCTGATCCAGCCATACCGCGTGGGTGAAGAAGGCCTTCGGGTTGTAAAGCCCTTTTGTTGGGAAAGAAATCCAGCTGGC…	1044	Pseudomonadota	Gammaproteobacteria	Xanthomonadales	Xanthomonadaceae	0	0	1713	95.99	Stenotrophomonas pavanii	Stenotrophomonas	367&368&370&375	OTU34	0	OTU34	99.19Forward	2 N mismatches
P1-13ET-D	MT355355	V09	Experimental/Fg-treated Silks	P	CO444	T	27F	1	0.000710227	TCGAACGGCAGCACAGGAGAGCTTGCTCTCTGGGTGGCGAGTGGCGGACGGGTGAGGAATACATCGGAATCTACTCTGTCGTGGGGGATAACGTAGGGAAACTTACGCTAATACCGCATACGACCTACGGGTGAAAGCAGGGGATCTTCGGGCCTTGCGCGATTGAATGAGCCGATGTCGGATTAGCTAGTTGGCGGGGTAAAGGCCCACCAAGGCGACGATCCGTAGCTGGTCTGAGAGGATGATCAGCCACACTGGAACTGAGACACGGTCCAGACTCCTACGGGAGGCAGCAGTGGGGAATATTGGACAATGGGCGCAAGCCTGATCCAGCCATACCGCGTGGGTGAAGAAGGCCTTCGGGTTGTAAAGCCCTTTTGTTGGGAAAGAAATCCAGCT…	1408	Pseudomonadota	Gammaproteobacteria	Xanthomonadales	Xanthomonadaceae	Stenotrophomonas	Stenotrophomonas pavanii	2518	99.72	Stenotrophomonas pavanii	Stenotrophomonas	375	OTU34	OTU34	0	100	None
P1-13ET-E	MT355356	V10	Experimental/Fg-treated Silks	P	CO444	T	27F	1	0.000707714	CATGCAGTCGAACGGCAGCACAGGAGAGCTTGCTCTCTGGGTGGCGAGTGGCGGACGGGTGAGGAATACATCGGAATCTACTCTGTCGTGGGGGATAACGTAGGGAAACTTACGCTAATACCGCATACGACCTACGGGTGAAAGCAGGGGATCTTCGGGCCTTGCGCGATTGAATGAGCCGATGTCGGATTAGCTAGTTGGCGGGGTAAAGGCCCACCAAGGCGACGATCCGTAGCTGGTCTGAGAGGATGATCAGCCACACTGGAACTGAGACACGGTCCAGACTCCTACGGGAGGCAGCAGTGGGGAATATTGGACAATGGGCGCAAGCCTGATCCAGCCATACCGCGTGGGTGAAGAAGGCCTTCGGGTTGTAAAGCCCTTTTGTTGGGAAAGAAA…	1413	Pseudomonadota	Gammaproteobacteria	Xanthomonadales	Xanthomonadaceae	Stenotrophomonas	Stenotrophomonas pavanii	2525	99.65	Stenotrophomonas pavanii	Stenotrophomonas	375	OTU34	OTU34	0	100	None
P1-13ET-F	MT355357	V11	Experimental/Fg-treated Silks	P	CO444	T	27F	1	0.000708717	TGCAGTCGAACGGCAGCACAGGAGAGCTTGCTCTCTGGGTGGCGAGTGGCGGACGGGTGAGGAATACATCGGAATCTACTCTGTCGTGGGGGATAACGTAGGGAAACTTACGCTAATACCGCATACGACCTACGGGTGAAAGCAGGGGATCTTCGGGCCTTGCGCGATTGAATGAGCCGATGTCGGATTAGCTAGTTGGCGGGGTAAAGGCCCACCAAGGCGACGATCCGTAGCTGGTCTGAGAGGATGATCAGCCACACTGGAACTGAGACACGGTCCAGACTCCTACGGGAGGCAGCAGTGGGGAATATTGGACAATGGGCGCAAGCCTGATCCAGCCATACCGCGTGGGTGAAGAAGGCCTTCGGGTTGTAAAGCCCTTTTGTTGGGAAAGAAATC…	1411	Pseudomonadota	Gammaproteobacteria	Xanthomonadales	Xanthomonadaceae	Stenotrophomonas	Stenotrophomonas pavanii	2522	99.72	Stenotrophomonas pavanii	Stenotrophomonas	375	OTU34	OTU34	0	100	None
P1-13ET-N	MT355358	V13	Experimental/Fg-treated Silks	P	CO444	T	27F	4	0.00283487	AGTCGAACGGCAGCACAGGAGAGCTTGCTCTCTGGGTGGCGAGTGGCGGACGGGTGAGGAATACATCGGAATCTACTCTGTCGTGGGGGATAACGTAGGGAAACTTACGCTAATACCGCATACGACCTACGGGTGAAAGCAGGGGANCTTCNGGCCTTGCGCGATTGAATGAGCCGATGTCGGATTAGCTAGTTGGCGGGGTAAAGGCCCACCAAGGCGACGATCCGTAGCTGGTCTGAGAGGATGATCAGCCACACTGGAACTGAGACACGGTCCAGACTCCTACGGGAGGCAGCAGTGGGGAATATTGGACAATGGGCGCAAGCCTGATCCAGCCATACCGCGTGGGTGAAGAAGGCCTTCGGGTTGTAAAGCCCTTTTGTTGGGAAAGAAANTCCA…	1411	Pseudomonadota	Gammaproteobacteria	Xanthomonadales	Xanthomonadaceae	Stenotrophomonas	Stenotrophomonas pavanii	2513	99.57	Stenotrophomonas pavanii	Stenotrophomonas	375	OTU34	OTU34	0	100	None
P1-2CB-G	MT355335	N26	Control/Healthy Silks	P	CO441	B	27F	2	0.00209424	CGCCTGCTTCCCTTACGGGTTGGCGCAACGCCTTCGGGTGAATCCAACTCCCATGGTGTGACGGGCGGTGTGTACAAGGCCTGGGAACGTATTCACCGCGGCATGCTGATCCGCGATTACTAGCGATTCCGCCTTCATGCTCTCGAGTTGCAGAGAACAATCCGAACTGAGACAACTTTTGGGGATTAGCTCGCCCTCGCAGGGTCGCTGCCCACTGTAGTTGCCATTGTAGCACGTGTGTAGCCCAGCGCGTAAGGGCCATGAGGACTTGACGTCATCCCCACCTTCCTCCGGCTTATCACCGGCGGTTCCTTTAGAGTACCCAACCAAATGATGGTAACTAAAGGCGAGGGTTGCGCTCGTTGCGGGACTTAACCCAACATCTCACGACACGAGCTG…	955	Pseudomonadota	Alphaproteobacteria	Sphingomonadales	Sphingomonadaceae	Sphingomonas	Sphingomonas yabuuchiae	1751	99.69	Sphingomonas yabuuchiae	Sphingomonas	357	OTU35	0	OTU35	99.21	2 N mismatches
L1-2CT-E	MT355360	U75	Control/Healthy Silks	L	CO441	T	27F	0	0	CGAGGCCCTTCGGGGTTTAGTGGCGCACGGGTGCGTAACGCGTGGGAATCTGCCCTTTGGTTCGGAATAACAGCTGGAAACGGCTGCTAATACCGGATGATGACGAAAGTCCAAAGATTTATCGCCAGAGGATGAGCCCGCGTTGGATTAGGTAGTTGGTGGGGTAAAGGCCTACCAAGCCGACGATCCATAGCTGGTCTGAGAGGATGATCAGCCACACTGGGACTGAGACACGGCCCAGACTCCTACGGGAGGCAGCAGTGGGGAATATTGGACAATGGGCGAAAGCCTGATCCAGCAATGCCGCGTGAGTGATGAAGGCCCTAGGGTTGTAAAGCTCTTTTACCCGGGAAGATAATGACTGTACCGGGAGAATAAGCCCCGGCTAACTCCGTGCCA…	1344	Pseudomonadota	Alphaproteobacteria	Sphingomonadales	Sphingomonadaceae	Sphingomonas	Sphingomonas yabuuchiae	2473	99.85	Sphingomonas yabuuchiae	Sphingomonas	357	OTU35	OTU35	0	100	None
L1-2ET-E	OM164282	M41	Experimental/Fg-treated Silks	L	CO441	T	27F	10	0.00785546	GTGGGAATCTGCCCTTAGGTTCGGAAAAACAGCTGGAAACGGCTGCTAATACCGGATGATATCGCGAGATCAAAGATTTATCGCCTGAGGATGAGCCCGCGTTGGATTAGGTAGTTGGTGGGGTAAAGGCCTACCAAGCCGACGATCCATAGCTGGTCTGAGAGGATGATCAGCCACACTGGGACTGAGACACGGCCCAGACTCCTACGGGAGGCAGCAGTGGGGAATATTGGACAATGGGCGCAAGCCTGATCCAGCAATGCCGCGTGAGTGATGAAGGCCCTAGGGTTGTAAAGCTCTTTTACCCGGGAAGATAATGACTGTACCGGGAGAATAAGCCCCGGCTAACTCCGTGCCAGCAGCCGCGGTAATACGGAGGGGGCTAGCGTTGTTCGGAAT…	1273	Pseudomonadota	Alphaproteobacteria	Sphingomonadales	Sphingomonadaceae	Sphingomonas	Sphingomonas yabuuchiae	2231	98.19	Sphingomonas yabuuchiae	Sphingomonas	356	OTU35	0	OTU35	99.22	2 N(space) mismatches
P1-6EB-A	OM164385	P57	Experimental/Fg-treated Silks	P	CO430	B	27F	2	0.00147059	TGCAGTCGAACGAAGGCTTCGGCCTTAGTGGCGCACGGGTGCGTAACGCGTGGGAATCTGCCCTCAGGTTCGGAATAACAGCTGGAAACGGCTGCTAATACCGGATGATATCGCGAGATCAAAGATTTATCGCCTGAGGATGAGCCCGCGTTGGATTAGGTAGTTGGTGGGGTAAAGGCCTACCAAGCCGACGATCCATAGCTGGTCTGAGAGGATGATCAGCCACACTGGGACTGAGACACGGCCCAGACTCCTACGGGAGGCAGCAGTGGGGAATATTGGACAATGGGCGCAAGCCTGATCCAGCAATGCCGCGTGAGTGATGAAGGCCCTTAGGGTTGTAAAGCTCNTTTTACCCGGGAAGATAATGACTGTACCGGGAGAATAAGCCCCGGCTAA…	1360	Pseudomonadota	Alphaproteobacteria	Sphingomonadales	Sphingomonadaceae	Sphingomonas	Sphingomonas sanguinis	2431	98.97	Sphingomonas sanguinis	Sphingomonas	353	OTU35	0	OTU35	99.61	1 N mismatch
P1-6ET-J	MT355359	R27	Experimental/Fg-treated Silks	P	CO430	T	27F	0	0	AGCCTTAGTGGCGCACGGGTGCGTAACGCGTGGGAATCTGCCCTTAGGTTCGGAATAACAGCTGGAAACGGCTGCTAATACCGGATGATATCGCGAGATCAAAGATTTATCGCCTGAGGATGAGCCCGCGTTGGATTAGGTAGTTGGTGGGGTAAAGGCCTACCAAGCCGACGATCCATAGCTGGTCTGAGAGGATGATCAGCCACACTGGGACTGAGACACGGCCCAGACTCCTACGGGAGGCAGCAGTGGGGAATATTGGACAATGGGCGCAAGCCTGATCCAGCAATGCCGCGTGAGTGATGAAGGCCCTAGGGTTGTAAAGCTCTTTTACCCGGGAAGATAATGACTGTACCGGGAGAATAAGCCCCGGCTAACTCCGTGCCAGCAGCCGCGGTA…	1304	Pseudomonadota	Alphaproteobacteria	Sphingomonadales	Sphingomonadaceae	Sphingomonas	Sphingomonas sanguinis	2368	99.46	Sphingomonas sanguinis	Sphingomonas	360	OTU35	OTU35	0	100	None
L1-4ET-L	OM164433	R45	Experimental/Fg-treated Silks	L	CO432	T	27F	0	0	ATGCAGTCGAACGAGGCCCTTCGGGGTTTAGTGGCGCACGGGTGCGTAACGCGTGGGAATCTGCCCTTTGGTTCGGAATAACAGCTGGAAACGGCTGCTAATACCGGATGATGACGAGAGTCCAAAGATTTATCGCCAGAGGATGAGCCCGCGTTGGATTAGGTAGTTGGTGGGGTAAAGGCCTACCAAGCCGACGATCCATAGCTGGTCTGAGAGGATGATCAGCCACACTGGGACTGAGACACGGCCCAGACTCCTACGGGAGGCAGCAGTGGGGAATATTGGACAATGGGCGAAAGCCTGATCCAGCAATGCCGCGTGAGTGATGAAGGCCCTAGGGTTGTAAAGCTCTTTTACCCGGGAAGATAATGACTGTACCGGGAGAATAAGCCCCGGCTA…	1360	Pseudomonadota	Alphaproteobacteria	Sphingomonadales	Sphingomonadaceae	Sphingomonas	Sphingomonas parapaucimobilis	2432	99.63	Sphingomonas parapaucimobilis	Sphingomonas	358	OTU35	OTU35	0	100	None
L1-4ET-G	OM164435	R47	Experimental/Fg-treated Silks	L	CO432	T	27F	1	0.00075188	GGTTTAGTGGCGCACGGGTGCGTAACGCGTGGGAATCTGCCCTTTGGTTCGGAATAACAGCTGGAAACGGCTGCTAATACCGGATGATGACGAGAGTCCAAAGATTTATCGCCAGAGGATGAGCCCGCGTTGGATTAGGTAGTTGGTGGGGTAAAGGCCTACCAAGCCGACGATCCATAGCTGGTCTGAGAGGATGATCAGCCACACTGGGACTGAGACACGGCCCAGACTCCTACGGGAGGCAGCAGTGGGGAATATTGGACAATGGGCGCAAGCCTGATCCAGCAATGCCGCGTGAGTGATGAAGGCCCTAGGGTTGTAAAGCTCTTTTACCCGGGAAGATAATGACTGTACCGGGAGAATAAGCCCCGGCTAACTCCGTGCCAGCAGCCGCGGTAA…	1330	Pseudomonadota	Alphaproteobacteria	Sphingomonadales	Sphingomonadaceae	Sphingomonas	0	2410	99.25	Sphingomonas parapaucimobilis	Sphingomonas	359	OTU35	OTU35	0	100	None
L1-5ET-E	OM164436	R48	Experimental/Fg-treated Silks	L	CO431	T	27F	0	0	TGCAGTCGAACGAGGCCCTTCGGGGTTTAGTGGCGCACGGGTGCGTAACGCGTGGGAATCTGCCCTTTGGTTCGGAATAACAGCTGGAAACGGCTGCTAATACCGGATGATGACGAAAGTCCAAAGATTTATCGCCAGAGGATGAGCCCGCGTTGGATTAGGTAGTTGGTGGGGTAAAGGCCTACCAAGCCGACGATCCATAGCTGGTCTGAGAGGATGATCAGCCACACTGGGACTGAGACACGGCCCAGACTCCTACGGGAGGCAGCAGTGGGGAATATTGGACAATGGGCGCAAGCCTGATCCAGCAATGCCGCGTGAGTGATGAAGGCCCTAGGGTTGTAAAGCTCTTTTACCCGGGAAGATAATGACTGTACCGGGAGAATAAGCCCCGGCTAA…	1343	Pseudomonadota	Alphaproteobacteria	Sphingomonadales	Sphingomonadaceae	Sphingomonas	Sphingomonas parapaucimobilis	2446	99.55	Sphingomonas parapaucimobilis	Sphingomonas	361	OTU35	OTU35	0	100	None
L1-6ET-C	OM241096	R50	Experimental/Fg-treated Silks	L	CO430	T	27F	5	0.00524659	TCGCCTGCTTCCTATTGCTAGGTTGGCGCAACGCCTTCGGGTGAATCCAACTCCCATGGTGTGACGGGCGGTGTGTACAAGGCCTGGGAACGTATTCACCGCGGCATGCTGATCCGCGATTACTAGCGATTCCGCCTTCATGCTCTCGAGTTGCAGAGAACAATCCGAACTGAGACAACTTTTGGGGATTAGCTCGCCCTCGCAGGGTCGCTGCCCACTGTAGTTGCCATTGTAGCACGTGTGTAGCCCAGCGCGTAAGGGCCATGAGGACTTGACGTCATCCCCACCTTCCTCCGGCTTATCACCGGCGGTTCCTTTAGAGTACCCAACCAAATGATGGTAACTAAAGGCGAGGGTTGCGCTCGTTGCGGGACTTAACCCAACATCTCACGACACGAG…	953	Pseudomonadota	Alphaproteobacteria	Sphingomonadales	Sphingomonadaceae	Sphingomonas	Sphingomonas parapaucimobilis	1731	99.16	Sphingomonas parapaucimobilis	Sphingomonas	358&359&360	OTU35	0	OTU35	98.81	3 N mismatches
L1-4ET-K	OM164439	R58	Experimental/Fg-treated Silks	L	CO432	T	27F	2	0.00147167	TGCAGTCGAACGAGGCCCTTCGGGGTTTAGTGGCGCACGGGTGCGTAACGCGTGGGAATCTGCCCTTTGGTTCGGAATAACAGCTGGAAACGGCTGCTAATACCGGATGATGACGAAAGTCCAAAGATTTATCGCCAGAGGATGAGCCCGCGTTGGATTAGGTAGTTGGTGGGGTAAAGGCCTACCAAGCCGACGATCCATAGCTGGTCTGAGAGGATGATCAGCCACACTGGGACTGAGACACGGCCCAGACTCCTACGGGAGGCAGCAGTGGGGAATATTGGACAATGGGCGAAAGCCTGATCCAGCAATGCCGNCGTGAGTGATGAAGGCCCTAGGGTTGTAAAGCTNCTTTTACCCGGGAAGATAATGACTGTACCGGGAGAATAAGCCCCGGCT…	1359	Pseudomonadota	Alphaproteobacteria	Sphingomonadales	Sphingomonadaceae	Sphingomonas	Sphingomonas yabuuchiae	2449	99.19	Sphingomonas yabuuchiae	Sphingomonas	362	OTU35	OTU35	0	100	None
L1-13ET-A	MT355361	U80	Experimental/Fg-treated Silks	L	CO444	T	27F	1	0.000763942	GGGTTTAGTGGCGCACGGGTGCGTAACGCGTGGGAATCTGCCCTTTGGTTCGGAATAACAGCTGGAAACGGCTGCTAATACCGGATGATGACGAAAGTCCAAAGATTTATCGCCAGAGGATGAGCCCGCGTTGGATTAGGTAGTTGGTGGGGTAAAGGCCTACCAAGCCGACGATCCATAGCTGGTCTGAGAGGATGATCAGCCACACTGGGACTGAGACACGGCCCAGACTCCTACGGGAGGCAGCAGTGGGGAATATTGGACAATGGGCGCAAGCCTGATCCAGCAATGCCGCGTGAGTGATGAAGGCCCTAGGGTTGTAAAGCTCTTTTACCCGGGAAGATAATGACTGTACCGGGAGAATAAGCCCCGGCTAACTCCGTGCCAGCAGCCGCGGTA…	1309	Pseudomonadota	Alphaproteobacteria	Sphingomonadales	Sphingomonadaceae	Sphingomonas	Sphingomonas parapaucimobilis	2338	99.62	Sphingomonas parapaucimobilis	Sphingomonas	363	OTU35	OTU35	0	100	None
P1-1ET-A	MT355362	V22	Experimental/Fg-treated Silks	P	CO449	T	27F	5	0.00367377	TGCAGTCGAACGAGGCCCTTCGGGGTTTAGTGGCGCACGGGTGCGTAACGCGTGGGAATCTGCCCTTTGGTTCGGAATAACAGCTGGAAACGGCTGCTAATACCGGATGATGACGAAAGTCCAAAGATTTATCGCCAGAGGATGAGCCCGCGTTGGATTAGGTAGTTGGTGGGGTAAAGGCCTACCAAGCCGACGATCCATAGCTGGTCTGAGAGGATGATCAGCCACACTGGGACTGAGACACGGCCCAGACTCCTACGGGAGGCAGCAGTGGGGAATATTGGACAATGGGCGAAAGCCTGATCCAGCAATGCCGCGTGAGTGATGAAGGCCCTAGGGTTNGTAAAGCTCNTTTTACCCNGGGAAGATAATGACTGTACCGGGAGAATAAGCCCCNGG…	1361	Pseudomonadota	Alphaproteobacteria	Sphingomonadales	Sphingomonadaceae	Sphingomonas	Sphingomonas yabuuchiae	2397	99.49	Sphingomonas yabuuchiae	Sphingomonas	357	OTU35	OTU35	0	100	None
P1-16ET-J	MT355363	V20	Experimental/Fg-treated Silks	P	CO462	T	27F	4	0.00287563	AGCTTGCTCTGTGGGTGGCGAGTGGCGGACGGGTGAGTAATGCATCGGGACCTACCCAGACGTGGGGGATAACGTAGGGAAACTTACGCTAATACCGCATACGTCCTACGGGAGAAAGCGGGGGATCGCAAGACCTCGCGCGGTTGGATGGACCGATGTGCGATTAGCTTGTTGGTGAGGTAACGGCTCACCAAGGCGACGATCGCTAGCTGGTCTGAGAGGATGATCAGCCACACTGGGACTGAGACACGGCCCAGACTCCTACGGGAGGCAGCAGTGGGGAATATTGGACAATGGGCGCAAGCCTGATCCAGCAATGCCGCGTGTGTGAAGAAGGCCCTCGGGTTGTAAAGCACTTTTATCAGGAGCGAAATCTGCAAGGTTAATACCTTTGCAGTC…	1391	Pseudomonadota	Gammaproteobacteria	Lysobacterales	Rhodanobacteraceae	Luteibacter	Luteibacter anthropi	2416	98.71	Luteibacter anthropi	Luteibacter	170	OTU39	OTU39	0	100	None
P1-16ET-M	MT308759	V39	Experimental/Fg-treated Silks	P	CO462	T	27F	8	0.00566974	TGCAGTCGAACGGCAGCACANNNNAGCTTGCTCTNNGGGTGGCGAGTGGCGGACGGGTGAGTAATGCATCGGGACCTACCCAGACGTGGGGGATAACGTAGGGAAACTTACGCTAATACCGCATACGTCCTACGGGAGAAAGCGGGGGATCGCAAGACCTCGCGCGGTTGGATGGACCGATGTGCGATTAGCTTGTTGGTGAGGTAACGGCTCACCAAGGCGACGATCGCTAGCTGGTCTGAGAGGATGATCAGCCACACTGGGACTGAGACACGGCCCAGACTCCTACGGGAGGCAGCAGTGGGGAATATTGGACAATGGGCGCAAGCCTGATCCAGCAATGCCGCGTGTGTGAAGAAGGCCCTCGGGTTGTAAAGCACTTTTATCAGGAGCGAAATC…	1411	Pseudomonadota	Gammaproteobacteria	Lysobacterales	Rhodanobacteraceae	Luteibacter	Luteibacter anthropi	2446	98.51	Luteibacter anthropi	Luteibacter	170	OTU39	OTU39	0	100	None
L1-16ET-P	MT355364	V58	Experimental/Fg-treated Silks	L	CO462	T	27F	6	0.0042735	ATGCAGTCGAACGGCAGCACANNNANAGCTTGCTCTGTGGGTGGCGAGTGGCGGACGGGTGAGTAATGCATCGGGACCTACCCAGACGTGGGGGATAACGTAGGGAAACTTACGCTAATACCGCATACGTCCTACGGGAGAAAGCGGGGGATCGCAAGACCTCGCGCGGTTGGATGGACCGATGTGCGATTAGCTTGTTGGTGAGGTAACGGCTCACCAAGGCGACGATCGCTAGCTGGTCTGAGAGGATGATCAGCCACACTGGGACTGAGACACGGCCCAGACTCCTACGGGAGGCAGCAGTGGGGAATATTGGACAATGGGCGCAAGCCTGATCCAGCAATGCCGCGTGTGTGAAGAAGGCCCTCGGGTTGTAAAGCACTTTTATCAGGAGCGAAA…	1404	Pseudomonadota	Gammaproteobacteria	Lysobacterales	Rhodanobacteraceae	Luteibacter	Luteibacter anthropi	2437	98.58	Luteibacter anthropi	Luteibacter	170	OTU39	OTU39	0	100	None
L1-16ET-D	MT355365	V63	Experimental/Fg-treated Silks	L	CO462	T	27F	6	0.00427046	TGCAGTCGAACGGCAGCACANNANAGCTTGCTCTGTGGGTGGCGAGTGGCGGACGGGTGAGTAATGCATCGGGACCTACCCAGACGTGGGGGATAACGTAGGGAAACTTACGCTAATACCGCATACGTCCTACGGGAGAAAGCGGGGGATCGCAAGACCTCGCGCGGTTGGATGGACCGATGTGCGATTAGCTTGTTGGTGAGGTAACGGCTCACCAAGGCGACGATCGCTAGCTGGTCTGAGAGGATGATCAGCCACACTGGGACTGAGACACGGCCCAGACTCCTACGGGAGGCAGCAGTGGGGAATATTGGACAATGGGCGCAAGCCTGATCCAGCAATGCCGCGTGTGTGAAGAAGGCCCTCGGGTTGTAAAGCACTTTTATCAGGAGCGAAATC…	1405	Pseudomonadota	Gammaproteobacteria	Lysobacterales	Rhodanobacteraceae	Luteibacter	Luteibacter anthropi	2436	98.64	Luteibacter anthropi	Luteibacter	170	OTU39	OTU39	0	100	None
L1-5CB-Z	MT308729	E04	Control/Healthy Silks	L	CO431	B	27F	11	0.00789096	GGTAGCACAGAGAGCTTGNTCTCGGGTGACNAGTGGCGGACGGGTGAGTAATGTCTGGGGATCTGCCCGATAGAGGGGGATAACCACTGGAAACGGTGGCTAATACCGCATAACGTCTCAAGACCAAAGAGGGGGACCTTCGGGCCTCTCACTATCGGATGAACCCAGATGGGATTAGCTAGTANGCGGGGTAATGGGCCACCTAGGCGACNATCCCTAGCTGGTCTGAGAGGATGACCAGCCACACTGGAACTGAGACACGGTCCANACTCCTACGGGAGGCANCAGTGGGGAATATTGCNCAATGGGCGCAAGCCTGATGCANCCATGCCGCGTGTATGAAAAANGCCTTCGGGTTGTAAAGTACTTTCAGCGGGGAGGAAAGCGATGGGGTTAATA…	1394	Pseudomonadota	Gammaproteobacteria	Enterobacterales	Erwiniaceae	Pantoea	0	2460	98.28	Pantoea agglomerans	Pantoea	246	OTU4	0	OTU4	99.22	2 N mismatches
L1-4CB-K	OM164345	O43	Control/Healthy Silks	L	CO432	B	27F	8	0.00566171	TGCANTCGGANGGTAGCACANANAGCTTGCTCTTGGGTGACGAGTGGCGGACGGGTGAGTAATGTCTGGGGATCTGCCCGATAGAGGGGGATAACCACTGGAAACGGTGGCTAATACCGCATAACGTCGCAAGACCAAAGAGGGGGACCTTCGGGCCTCTCACTATCGGATGAACCCAGATGGGATTAGCTAGTAGGCGGGGTAATGGCCCACCTAGGCGACGATCCCTAGCTGGTCTGAGAGGATGACCAGCCACACTGGAACTGAGACACGGTCCAGACTCCTACGGGAGGCAGCAGTGGGGAATATTGCACAATGGGCGCAAGCCTGATGCAGCCATGCCGCGTGTATGAAGAAGGCCTTCGGGTTGTAAAGTACTTTCAGCGGGGAGGAANGGCG…	1413	Pseudomonadota	Gammaproteobacteria	Enterobacterales	Erwiniaceae	Pantoea	0	2471	98.3	Pantoea ananatis	Pantoea	217	OTU4	OTU4	0	100	None
L1-4CB-H	OM164350	O56	Control/Healthy Silks	L	CO432	B	27F	26	0.0185317	AGTCGGACGGTAGCACAGAGGANCTTGCTCCTTGGGTGACGAGTGGCGGACGGGTGAGTAGTGTNNGGGGATCTGCCCGATAGAGGGGGATAACCACTGGAAACGGTGGCTAATACCGCATAACGTCGCAAGACCAAAGAGGGGGACCTTCGGGCCTCTCACTATCGGATGAACCCANATGGGATTAGCTAGTGNGCGGGGTAGTGGCCCACCTANGCNACNATCCCTAGCTGGTCTGANAGGATGACCAGCCACACTGGAACTGANACACGGTCCANACTCCTACGGGANGCANCTGTGGGGAATATTGCACAGTGGGCGCAAGCCTGATGCACCCNTGCCGCGTGTATGAANAANGCCTTCGGGTTGTAAAGTACTTTCAGCGGGGANGAAGGCGAT…	1403	Pseudomonadota	Gammaproteobacteria	Enterobacterales	Erwiniaceae	0	0	2365	97.01	Pantoea agglomerans	Pantoea	228&230&231&232	OTU4	0	OTU4	99.21	2 N mismatches
P1-4CB-H	OM164367	P14	Control/Healthy Silks	P	CO432	B	27F	17	0.0120482	TGCAGTCGGANGGTAGCACNGAGAGCTTGCTCTTGGGTGACNAGTGGCGGACGGGTGAGTAATGTCTGGGGATCTGCCCGATAGAGGGGGATAACCACTGGAAACGGTGGCTAATACCGCATAACGTCTCAAGACCAAAGAGGGGGACCTTCGGGCCTCTCACTATCGGATGAACCCAGATGGGATTNGCTAGTAGGCGGGGTAATGGCCCACCTAGGCGACNATCCCTAGCTGGTCTGAGAGGATGACCAGCCACACTGGAACTGAGACACGGTCCANACTCCTACGGGAGGCGGCNGTGGGGAATATTGCACAATGGGCGCAAGCCTGATGCANCCATGCCGCGTGTATGAAGAANGCCTTCGGGTTGTAAAGTACTTTCAGCGGGGAGGAAGGCGG…	1411	Pseudomonadota	Gammaproteobacteria	Enterobacterales	Erwiniaceae	0	0	2379	97.3	Pantoea ananatis	Pantoea	211	OTU4	0	OTU4	99.61	1 N mismatch
P1-4CB-L	OM164369	P19	Control/Healthy Silks	P	CO432	B	27F	15	0.0106762	TGCAGTCGGACGGTAGCACAGANAGCTTGCTCTCGGGTGACNAGTGGCGGACGGGTGAGTAATGTCTGGGGATCTGCCCGATAGAGGGGGATAACCACTGGAAACGGTGGCTAATACCGCATAACGTCTCAAGACCAAAGAGGGGGACCTTCNGGCCTCTCACTATCGGATGAACCCNGATGGGATTNGCTAGTAGGCGGGGTAATGGCCCACCTAGGCGACNATCCCTAGCTGGTCTGAGAGGATGACCAGCCACACTGGAACTGAGACACGGTCCANACTCCTACGGGAGGCNNCAGTGGGGAATATTGCGCAATGGGCGCAAGCCTGATGCANCCATGCCGCGTGTATGAAAAANGCCTTCGGGTTGTAAAGTACTTTCAGCGGGGAGGAANGCGG…	1405	Pseudomonadota	Gammaproteobacteria	Enterobacterales	Erwiniaceae	0	0	2390	97.79	Pantoea agglomerans	Pantoea	239	OTU4	0	OTU4	99.22	2 N mismatches
L1-19CT-C	OM164392	P72	Control/Healthy Silks	L	P9855HR	T	27F	21	0.0149679	TCGGACGGTAGCACNNANAGCTTGCTCTCNNGTGACNAGTGGCGGACNGGTGAGTAATGTCTGGGGATCTGCCCGATAGAGGGGGATAACCACTGGAAACGGTGGCTAATACCGCATAACGTCTCAAGACCAAAGAGGGGGACCTTCGGGCCTCTCACTATCGGATGAACCCNNATGGGATTAGCTAGTAGGCGGGGTAATGGCCCACCTAGGCGACNATCCCTAGCTGGTCTGAGAGGATGACCNGCCACACTGGAACTGAGACACGGTCCANACTCCTACGGGAGGCGNCNGTGGGGAATATTGCACAATGGGCGCAAGCCTGATGCANCCATGCCGCGTGTATGAAAAANGCCTTCTGGTTGTAAAGTACTTTCNCCGGGGAGGAAAGCGATGCGG…	1403	Pseudomonadota	Gammaproteobacteria	Enterobacterales	Erwiniaceae	0	0	2369	97.21	Pantoea ananatis	Pantoea	233&235&238	OTU4	OTU4	0	100	None
P1-18CT-A	OM164407	Q35	Control/Healthy Silks	P	P38157	T	27F	1	0.000726744	AGTCGGACGGTAGCACAAAGAGCTTGCTCTTGGGTGACGAGTGGCGGACGGGTGAGTAATGTCTGGGGATCTGCCCGATAGAGGGGGATAACCACTGGAAACGGTGGCTAATACCGCATAACGTCGCAAGACCAAAGAGGGGGACCTTCGGGCCTCTCACTATCGGATGAACCCAGATGGGATTAGCTAGTAGGCGGGGTAATGGCCCACCTAGGCGACGATCCCTAGCTGGTCTGAGAGGATGACCAGCCACACTGGAACTGAGACACGGTCCAGACTCCTACGGGAGGCAGCAGTGGGGAATATTGCACAATGGGCGCAAGCCTGATGCAGCCATGCCGCGTGTATGAAGAAGGCCTTCGGGTTGTAAAGTACTTTCAGCGGGGAGGAAGGCGATGT…	1376	Pseudomonadota	Gammaproteobacteria	Enterobacterales	Erwiniaceae	0	0	2455	98.84	Pantoea agglomerans	Pantoea	221	OTU4	OTU4	0	100	None
L1-18CT-I	OM164415	Q56	Control/Healthy Silks	L	P38157	T	27F	5	0.00362056	CATGCAGTCGGANGGTAGCACANAGAGCTTGCTCTTGGGTGACGAGTGGCGGACGGGTGAGTAATGTCTGGGGATCTGCCCGATAGAGGGGGATAACCACTGGAAACGGTGGCTAATACCGCATAACGTCGCAAGACCAAAGAGGGGGACCTTCGGGCCTCTCACTATCGGATGAACCCAGATGGGATTAGCTAGTAGGCGGGGTAATGGCCCACCTAGGCGACAATCCCTAGCTGGTCTGAGAGGATGACCAGCCACACTGGAACTGAGACACGGTCCAGACTCCTACGGGAGGCAGCAGTGGGGAATATTGCACAATGGGCGCAAGCCTGATGCAGCCATGCCGCGTGTATGAAGAAGGCCTTCGGGTTGTAAAGTACTTTCAGCGGGGAGGAAGGC…	1381	Pseudomonadota	Gammaproteobacteria	Enterobacterales	Erwiniaceae	Pantoea	0	2451	98.56	Pantoea agglomerans	Pantoea	222	OTU4	OTU4	0	100	None
P1-1CT-E	OM164450	R83	Control/Healthy Silks	P	CO449	T	27F	4	0.00283086	TGCAGTCGAACGGTAGCACAGAGGAGCTTGCTCNTNGGGTGACGAGTGGCGGACGGGTGAGTAATGTCTGGGGATCTGCCCGATGGAGGGGGATAACCACTGGAAACGGTGGCTAATACCGCATAACGTCGCAAGACCAAAGTGGGGGACCTTCGGGCCTCACACCATCGGATGAACCCAGATGGGATTAGCTAGTAGGTGGGGTAACGGCTCACCTAGGCGACGATCCCTAGCTGGTCTGAGAGGATGACCAGCCACACTGGAACTGAGACACGGTCCAGACTCCTACGGGAGGCAGCAGTGGGGAATATTGCACAATGGGCGCAAGCCTGATGCAGCCATGCCGCGTGTATGAAGAAGGCCTTCGGGTTGTAAAGTACTTTCAGCGGGGAGGAAGGG…	1413	Pseudomonadota	Gammaproteobacteria	Enterobacterales	Erwiniaceae	0	0	2408	97.87	Pantoea agglomerans	Pantoea	209	OTU4	OTU4	0	100	None
P1-11CT-D	OM241097	S30	Control/Healthy Silks	P	CO452	T	27F	8	0.00829016	TGGTAAGCGCCCTCCCGAAGGNTAAGCTACCTACTTCTTTTGCAACCCACTCCCATGGTGTGACGGGCGGTGTGTACAAGGCCCGGGAACGTATTCACCGTGGCATTCTGATCCACGATTACTAGCGATTCCGACTTCACGGAGTCGAGTTGCAGACTCCGATCCGGACTACGACGCACTTTGTGAGGTCCGCTTGCTCTCGCGAGGTCGCTTCTCTTTGTATGCGCCATTGTAGCACGTGTGTAGCCCTACTCGTAAGGGCCATGATGACTTGACGTCATCCCCACCTTCCTCCGGTTTATCACCGGCAGTCTCCTTTGAGTTCCCGACCGAATCGCTGGCAACAAAGGATAAGGGTTGCGCTCGTTGCGGGACTTAACCCAACATTTCACAACACGA…	965	Pseudomonadota	Gammaproteobacteria	Enterobacterales	Erwiniaceae	Pantoea	Pantoea agglomerans	1706	99.07	Pantoea agglomerans	Pantoea	246&402	OTU4	0	OTU4	96.85	7 N mismatches, 1 space next to 3 N's
P1-2CB-D	OM241076	S35	Control/Healthy Silks	P	CO441	B	27F	6	0.00628272	GCCCTCCCGAAGGTTAAGCTACCTACTTCTTTTGCAACCCACTCCCATGGTGTGACGGGCGGTGTGTACAAGGCCCGGGAACGTATTCACCGTGGCATTCTGATCCACGATTACTAGCGATTCCGACTTCACGGAGTCGAGTTGCAGACTCCGATCCGGACTACGACGCACTTTGTGAGGTCCGCTTGCTCTCGCGAGGTCGCTTCTCTTTGTATGCGCCATTGTAGCACGTGTGTAGCCCTACTCGTAAGGGCCATGATGACTTGACGTCATCCCCACCTTCCTCCGGTTTATCACCGGCAGTCTCCTTTGAGTTCCCGACCGAATCGCTGGCAACAAAGGATAAGGGTTGCGCTCGTTGCGGGACTTAACCCAACATTTCACAACACGAGCTGACGA…	955	Pseudomonadota	Gammaproteobacteria	Enterobacterales	Erwiniaceae	Pantoea	Pantoea agglomerans	1695	99.27	Pantoea agglomerans	Pantoea	246&402	OTU4	0	OTU4	97.24	6 N mismatches, 1 space next to 3 N's
P1-1CT-G	OM164464	S38	Control/Healthy Silks	P	CO449	T	27F	9	0.0064194	AGTCGGANGGTAGCACAGAGANGCTTGCTCTTGGGTGACGAGTGGCGGACGGGTGAGTAATGTCTGGGGATCTGCCCGATAGAGGGGGATAACCACTGGAAACGGTGGCTAATACCGCATAACGTCGCAAGACCAAAGAGGGGGACCTTCGGGCCTCTCACTATCGGATGAACCCAGATGGGATTAGCTAGTAGGCGGGGTAATGGCCCACCTAGGCGACGATCCCTAGCTGGTCTGAGAGGATGACCAGCCACACTGGAACTGAGACACGGTCCAGACTCCTACGGGAGGCAGCAGTGGGGAATATTGCACAATGGGCGCAAGCCTGATGCAGCCATGCCGCGTGTATGAAGAAGGCCTTCGGGTTGTAAAGTACTTTCAGCGGGGAGGAAGGCGGTG…	1402	Pseudomonadota	Gammaproteobacteria	Enterobacterales	Erwiniaceae	0	0	2468	98.29	Pantoea agglomerans	Pantoea	218	OTU4	0	OTU4	99.21	2 N mismatches
P1-6CB-B	OM241098	S48	Control/Healthy Silks	P	CO430	B	27F	14	0.0140987	TGGTAAGCGCCCTCCCGAAGGNTAAGCTACCTACTTCTTTTGCAACCCACTCCCATGGTGTGACGGGCGGTGTGTACAAGGCCCGGGAACGTATTCACCGTGGCATTCTGATCCACGATTACTAGCGATTCCGACTTCACGGAGTCGAGTTGCAGACTCCGATCCGGACTACGACGCACTTTGTGAGGTCCGCTTGCTCTCGCGAGGTCGCTTCTCTTTGTATGCGCCATTGTAGCACGTGTGTAGCCCTACTCGTAAGGGCCATGATGACTTGACGTCATCCCCACCTTCCTCCGGTTTATCACCGGCAGTCTCCTTTGAGTTCCCGACCGAATCGCTGGCAACAAAGGATAAGGGTTGCGCTCGTTGCGGGACTTAACCCAACATTTCACAACACGA…	993	Pseudomonadota	Gammaproteobacteria	Enterobacterales	Erwiniaceae	Pantoea	Pantoea brenneri	1772	98.39	Pantoea brenneri	Pantoea	228&230&235	OTU4	0	OTU4	96.85	7 N mismatches, 1 space next to 2 N's
L1-1CT-I	OM241074	S49	Control/Healthy Silks	L	CO449	T	27F	14	0.0152009	CTTCTTTTGCAACCCACTCCCATGGTGTGACGGGCGGTGTGTACAAGGCCCGGGAACGTATTCACCGTGGCATTCTGATCCACGATTACTAGCGATTCCGACTTCACGGAGTCGAGTTGCAGACTCCGATCCGGACTACGACGCACTTTGTGAGGTCCGCTTGCTCTCGCGAGGTCGCTTCTCTTTGTATGCGCCATTGTAGCACGTGTGTAGCCCTACTCGTAAGGGCCATGATGACTTGACGTCATCCCCACCTTCCTCCGGTTTATCACCGGCAGTCTCCTTTGAGTTCCCGACCGAATCGCTGGCAACAAAGGATAAGGGTTGCGCTCGTTGCGGGACTTAACCCAACATTTCACAACACGAGCTGACGACAGCCATGCAGCACCTGTCTCACGG…	921	Pseudomonadota	Gammaproteobacteria	Enterobacterales	Erwiniaceae	0	0	1605	98.37	Pantoea agglomerans	Pantoea	246&402	OTU4	0	OTU4	96.85	7 N mismatches, 1 space next to 3 N's
L1-6CB-G	OM241077	S63	Control/Healthy Silks	L	CO430	B	27F	21	0.020649	GCGCCCTCCCGAAGGNTAAGCTACCTACTTCTTTTGCAACCCACTCCCATGGTGTGACGGGCGGTGTGTACAAGGCCCGGGAACGTATTCACCGTGGCATTCTGATCCACGATTACTAGCGATTCCGACTTCACGGAGTCGAGTTGCAGACTCCGATCCGGACTACGACGCACTTTGTGAGGTCCGCTTGCTCTCGCGAGGTCGCTTCTCTTTGTATGCGCCATTGTAGCACGTGTGTAGCCCTACTCGTAAGGGCCATGATGACTTGACGTCATCCCCACCTTCCTCCGGTTTATCACCGGCAGTCTCCTTTGAGTTCCCGACCGAATCGCTGGCAACAAAGGATAAGGGTTGCGCTCGTTGCGGGACTTAACCCAACATTTCACAACACGAGCTGAC…	1017	Pseudomonadota	Gammaproteobacteria	Enterobacterales	Erwiniaceae	0	0	1729	97.45	Pantoea agglomerans	Pantoea	225	OTU4	0	OTU4	97.24	6 N mismatches, 1 space next to 2 N's
L1-12CT-H	OM241064	S69	Control/Healthy Silks	L	CO448	T	27F	5	0.00526316	CGCCCTCCCGAAGGTTAAGCTACCTACTTCTTTTGCAACCCACTCCCATGGTGTGACGGGCGGTGTGTACAAGGCCCGGGAACGTATTCACCGTGGCATTCTGATCCACGATTACTAGCGATTCCGACTTCACGGAGTCGAGTTGCAGACTCCGATCCGGACTACGACGCACTTTGTGAGGTCCGCTTGCTCTCGCGAGGTCGCTTCTCTTTGTATGCGCCATTGTAGCACGTGTGTAGCCCTACTCGTAAGGGCCATGATGACTTGACGTCATCCCCACCTTCCTCCGGTTTATCACCGGCAGTCTCCTTTGAGTTCCCGCCATGACGCGCTGGCAACAAAGGATAAGGGTTGCGCTCGTTGCGGGACTTAACCCAACATTTCACAACACGAGCTGAC…	950	Pseudomonadota	Gammaproteobacteria	Enterobacterales	Erwiniaceae	Pantoea	0	1654	98.63	Pantoea brenneri	Pantoea	216	OTU4	0	OTU4	97.64	6 N mismatches
L1-11CT-A	OM241049	T03	Control/Healthy Silks	L	CO452	T	27F	10	0.0100604	AGTGGTAGCNCCCTCCCGAAGGTTAAGCTACCTACTTCTTTTGCAACCCACTCCCATGGTGTGACGGGCGGTGTGTACAAGGCCCGGGAACGTATTCACCGTGGCATTCTGATCCACGATTACTAGCGATTCCGACTTCACGGAGTCGAGTTGCAGACTCCGATCCGGACTACGACGCACTTTGTGAGGTCCGCTTGCTCTCGCGAGGTCGCTTCTCTTTGTATGCGCCATTGTAGCACGTGTGTAGCCCTACTCGTAAGGGCCATGATGACTTGACGTCATCCCCACCTTCCTCCGGTTTATCACCGGCAGTCTCCTTTGAGTTCCCGACCGAATCGCTGGCAACAAAGGATAAGGGTTGCGCTCGTTGCGGGACTTAACCCAACATTTCACAACACG…	994	Pseudomonadota	Gammaproteobacteria	Enterobacterales	Erwiniaceae	Pantoea	Pantoea agglomerans	1745	98.8	Pantoea agglomerans	Pantoea	246&402	OTU4	0	OTU4	97.24	6 N mismatches, 1 space next to 3 N's
P1-5CT-D	OM164497	T45	Control/Healthy Silks	P	CO431	T	27F	16	0.0116279	TGCAGTCGNACGGNGNCACNAANAGCTTGCTCTCGGGTGACNAGTGGNGGACGGGTGAGTAATGTCTGGGGATCTGCCCGATAGAGGGGGATAACCACTGGAAACGGTGGCTAATACCGCATAACGTCTCAAGACCAAAGAGGGGGACCTTCTGGCCTCTCACTATCGGATGAACCCNGATGGGANTAGCTAGTAGGCGGGGTAATGGCCCACCTAGGCGACNATCCCTAGCTGGTCTGAGAGGATGACCAGCCACACTGGAACTGAGACACGGTCCANACTCCTACGGGAGGCNGCNGTGGGGAATATTGCACAATGGGCGCAAGCCTGATGCANCCATGCCGCGTGTATGAAAAANGCCTTCTGGTTGTAAAGTACTTTCAGCGGGGAGGAAGGCGA…	1376	Pseudomonadota	Gammaproteobacteria	Enterobacterales	Erwiniaceae	0	0	2348	98.38	Pantoea agglomerans	Pantoea	242	OTU4	OTU4	0	100	None
L1-5EB-B	MT355374	P03	Experimental/Fg-treated Silks	L	CO431	B	27F	1	0.000710227	GGTAGCGCCCTCCCGAAGGTTAAGCTACCTACTTCTTTTGCAACCCACTCCCATGGTGTGACGGGCGGTGTGTACAAGGCCCGGGAACGTATTCACCGTGGCATTCTGATCCACGATTACTAGCGATTCCGACTTCACGGAGTCGAGTTGCAGACTCCGATCCGGACTACGACGCACTTTGTGAGGTCCGCTTGCTCTCGCGAGGTCGCTTCTCTTTGTATGCGCCATTGTAGCACGTGTGTAGCCCTACTCGTAAGGGCCATGATGACTTGACGTCATCCCCACCTTCCTCCGGTTTATCACCGGCAGTCTCCTTTGAGTTCCCGACCGAATCGCTGGCAACAAAGGATAAGGGTTGCGCTCGTTGCGGGACTTAACCCAACATTTCACAACACGAGC…	1408	Pseudomonadota	Gammaproteobacteria	Enterobacterales	Erwiniaceae	Pantoea	Pantoea agglomerans	2472	99.15	Pantoea agglomerans	Pantoea	230	OTU4	OTU4	0	100	None
P1-5EB-F	OM164378	P46	Experimental/Fg-treated Silks	P	CO431	B	27F	14	0.0102941	AGAGCTTGCTCTTGGGTGACGAGTGGCGGACGGGTGAGTAATGTCTGGGGATCTGCCCGATAGAGGGGGATAACCACTGGAAACGGTGGCTAATACCGCATAACGTCGCAAGACCAAAGAGGGGGACCTTCGGGCCTCTCACTATCGGATGAACCCAGATGGGATTAGCTAGTAGGCGGGGTAATGGCCCACCTAGGCGACGATCCCTAGCTGGTCTGAGAGGATGACCAGCCACACTGGAACTGAGACACGGTCCAGACTCCTACGGGAGGCAGCAGTGGGGAATATTGCACAATGGGCGCAAGCCTGATGCAGCCATGCCGCGTGTATGAAGAAGGCCTTCGGGTTGTAAAGTACTTTCAGCGGGGAGGAAGGCGATGTGGTTAATAACCNNNNCGA…	1360	Pseudomonadota	Gammaproteobacteria	Enterobacterales	Erwiniaceae	0	0	2392	98.16	Pantoea agglomerans	Pantoea	214	OTU4	0	OTU4	98.82	3 N mismatches
P1-5EB-L	OM241029	P58	Experimental/Fg-treated Silks	P	CO431	B	27F	44	0.0417854	GTGGTANGCGCCCTCCCGAAGNNTAAGCTACCTACTTCTTTTGCAACCCACTCCCATGGTGTGACGGGCGGTGTGTACAAGGCCCGGGAACGTATTCACCGTGGCATTCTGATCCACGATTACTAGCGATTCCGACTTCACGGAGTCGAGTTGCAGACTCCGATCCGGACTACGACGCACTTTGTGAGGTCCGCTTGCTCTCGCGAGGTCGCTTCTCTTTGTATGCGCCATTGTAGCACGTGTGTAGCCCTACTCGTAAGGGCCATGATGACTTGACGTCATCCCCACCTTCCTCCGGTTTATCACCGGCAGTCTCCTTTGAGTTCCCGACCGAATCGCTGGCAACAAAGGATAAGGGTTGCGCTCGTTGCGGGACTTAACCCAACATTTCACAACACG…	1053	Pseudomonadota	Gammaproteobacteria	Enterobacterales	Erwiniaceae	0	0	1709	95.26	Pantoea agglomerans and Pantoea brenneri	Pantoea	230&235	OTU4	0	OTU4	96.85	7 N mismatches, 1 non-N mismatch (space)
L1-5ET-C	OM241058	Q01	Experimental/Fg-treated Silks	L	CO431	T	27F	15	0.0145631	CCCTCCCGAAGGTTAAGCTACCTACTTCTTTTGCAACCCACTCCCATGGTGTGACGGGCGGTGTGTACAAGGCCCGGGAACGTATTCACCGTGGCATTCTGATCCACGATTACTAGCGATTCCGACTTCACGGAGTCGAGTTGCAGACTCCGATCCGGACTACGACGCACTTTGTGAGGTCCGCTTGCTCTCGCGAGGTCGCTTCTCTTTGTATGCGCCATTGTAGCACGTGTGTAGCCCTACTCGTAAGGGCCATGATGACTTGACGTCATCCCCACCTTCCTCCGGTTTATCACCGGCAGTCTCCTTTGAGTTCCCGACCGAATCGCTGGCAACAAAGGATAAGGGTTGCGCTCGTTGCGGGACTTAACCCAACATTTCACAACACGAGCTGACGAC…	1030	Pseudomonadota	Gammaproteobacteria	Enterobacterales	Erwiniaceae	Pantoea	0	1526	99.52	Pantoea agglomerans	Pantoea	230&235	OTU4	0	OTU4	97.24	6 N mismatches, 1 non-N mismatch (space)
P1-19ET-E	OM241063	T15	Experimental/Fg-treated Silks	P	P9855HR	T	27F	6	0.00627615	CGCCCTCCCGAAGGNTAAGCTACCTACTTCTTTTGCAACCCACTCCCATGGTGTGACGGGCGGTGTGTACAAGGCCCGGGAACGTATTCACCGTGGCATTCTGATCCACGATTACTAGCGATTCCGACTTCACGGAGTCGAGTTGCAGACTCCGATCCGGACTACGACGCACTTTGTGAGGTCCGCTTGCTCTCGCGAGGTCGCTTCTCTTTGTATGCGCCATTGTAGCACGTGTGTAGCCCTACTCGTAAGGGCCATGATGACTTGACGTCATCCCCACCTTCCTCCGGTTTATCACCGGCAGTCTCCTTTGAGTTCCCGCCATCACGCGCTGGCAACAAAGGATAAGGGTTGCGCTCGTTGCGGGACTTAACCCAACATTTCACAACACGAGCTGAC…	956	Pseudomonadota	Gammaproteobacteria	Enterobacterales	Erwiniaceae	Pantoea	Pantoea eucalypti	1724	99.26	Pantoea eucalypti	Pantoea	220	OTU4	0	OTU4	97.64	6 N mismatches
P1-16ET-E	OM241092	T54	Experimental/Fg-treated Silks	P	CO462	T	27F	14	0.0144033	TAAGCTACCTACTTCTTTTGCAACCCACTCCCATGGTGTGACGGGCGGTGTGTACAAGGCCCGGGAACGTATTCACCGTGGCATTCTGATCCACGATTACTAGCGATTCCGACTTCACGGAGTCGAGTTGCAGACTCCGATCCGGACTACGACGCACTTTGTGAGGTCCGCTTGCTCTCGCGAGGTCGCTTCTCTTTGTATGCGCCATTGTAGCACGTGTGTAGCCCTACTCGTAAGGGCCATGATGACTTGACGTCATCCCCACCTTCCTCCGGTTTATCACCGGCAGTCTCCTTTGAGTTCCCGACCGAATCGCTGGCAACAAAGGATAAGGGTTGCGCTCGTTGCGGGACTTAACCCAACATTTCACAACACGAGCTGACGACAGCCATGCAGCAC…	972	Pseudomonadota	Gammaproteobacteria	Enterobacterales	Erwiniaceae	0	0	1682	97.94	Pantoea agglomerans	Pantoea	232&233&238&401	OTU4	0	OTU4	97.24	6 N mismatches, 1 non-N mismatch (space)
P1-8ET-N	OM262834	U13	Experimental/Fg-treated Silks	P	CO325	T	27F	4	0.00417973	CGCCCTCCCGAAGGTTAAGCTACCTACTTCTTTTGCAACCCACTCCCATGGTGTGACGGGCGGTGTGTACAAGGCCCGGGAACGTATTCACCGTGGCATTCTGATCCACGATTACTAGCGATTCCGACTTCACGGAGTCGAGTTGCAGACTCCGATCCGGACTACGACGCACTTTGTGAGGTCCGCTTGCTCTCGCGAGGTCGCTTCTCTTTGTATGCGCCATTGTAGCACGTGTGTAGCCCTACTCGTAAGGGCCATGATGACTTGACGTCATCCCCACCTTCCTCCGGTTTATCACCGGCAGTCTCCTTTGAGTTCCCGACCGAATCGCTGGCAACAAAGGATAAGGGTTGCGCTCGTTGCGGGACTTAACCCAACATTTCACAACACGAGCTGACG…	957	Pseudomonadota	Gammaproteobacteria	Enterobacterales	Erwiniaceae	0	0	1712	99.58	Pantoea agglomerans	Pantoea	246&402	OTU4	0	OTU4	98.43	4 N mismatches
L1-1EB-J	OM302479	O42	Experimental/Fg-treated Silks	L	CO449	B	27F	32	0.0234776	two shorter sequences: TCGGACGGGNTCCGNANGGAGAGCTTGCTCGAAGACGGTGAGAGTGGCGCACGGGTGCGTAACGCGTGAGCAACCTACCTCTATCAGGGGGATAGCCTCTCGAAAGAGAGATTAACACCGCATAATATAATTTGCCGGCATCGGGAAATTATTAAATATTTATAGGATAGAGATGGGCTCGCGTGACATTAGCTAGTTGGTAGGGTAACGGCTTACCAAGGCGACGATGTCTAGGGGCTCTGAGAGGAGAATCCCCCACACTGGTACTGAGACACGGACCAGACTCCTACGGGAGGCAGCAGTAAGGAATATTGGTCAATGGGCGGAAGCCTGAACCAGCCATGCCGCGTGCAGGAAGACTGCCCTATGGGTTGTA…	1004&359	Bacteroidota	Sphingobacteriia	Sphingobacteriales	Sphingobacteriaceae	Sphingobacterium	0	1644/ 583	95.92/ 95.80	Sphingobacterium caeni/ Sphingobacterium multivorum	Sphingobacterium	348	OTU45	0	OTU45	99.61	1 N mismatch
L1-1ET-E	OM164533	U59	Experimental/Fg-treated Silks	L	CO449	T	27F	14	0.0100358	TGCAGTCGGACGGGATCCGTCGGAGAGCTTGCTCGAAGACGGTGAGAGTGGCGCACGGGTGCGTAACGCGTGAGCAACCTACCTCTATCAGGGGGATAGCCTCTCGAAAGAGAGATTAACACCGCATAACATATTTTGCCGGCATCGGGNAATTATTAAATATTTATAGGATAGAGATGGGCTCGCGTGACATTAGCTAGTTGGTAGGGTAACGGCTTACCAAGGCGACGATGTCTAGGGGCTCTGAGAGGAGAATCCCCCACACTGGTACTGAGACACGGACCAGACTCCTACGGGAGGCAGCAGTAAGGAATATTGGTCAATGGGCGGAAGCCTGAACCAGCCATGCCGCGTGCAGGAAGACTGCCCTATGGGTTGTAAACTGCTTTTGTCCAGGAA…	1395	Bacteroidota	Sphingobacteriia	Sphingobacteriales	Sphingobacteriaceae	Sphingobacterium	0	2362	97.49	Sphingobacterium siyangense	Sphingobacterium	347	OTU45	OTU45	0	100	None
P1-18CT-C	OM164423	R07	Control/Healthy Silks	P	P38157	T	27F	4	0.00295203	TGCAGTCGNACGCCCCGCAAGNNGGAGTGGCAGACGGGTGAGTAACGCGTGGGAATCTACCGTGCCCTGCGGAATAGCTCCGGGAAACTGGAATTAATACCGCATACGCCCTACGGGGGAAAGATTTATCGGGGTATGATGAGCCCGCGTTGGATTAGCTAGTTGGTGGGGTAAAGGCCTACCAAGGCGACGATCCATAGCTGGTCTGAGAGGATGATCAGCCACATTGGGACTGAGACACGGCCCAAACTCCTACGGGAGGCAGCAGTGGGGAATATTGGACAATGGGCGCAAGCCTGATCCAGCCATGCCGCGTGAGTGATGAAGGCCTTAGGGTTGTAAAGCTCTTTCACCGGAGAAGATAATGACGGTATCCGGAGAAGAAGCCCCGGCTAACTT…	1355	Pseudomonadota	Alphaproteobacteria	Hyphomicrobiales	Rhizobiaceae	Rhizobium	Rhizobium nepotum	2470	99.48	Rhizobium nepotum	Rhizobium	331	OTU49	OTU49	0	100	None
P1-13ET-L	OM241030	T63	Experimental/Fg-treated Silks	P	CO444	T	27F	23	0.0226378	GCCCTCCCGAAGGTTAAGCTACCTACTTCTTTTGCAACCCACTCCCATGGTGTGACGGGCGGTGTGTACAAGGCCCGGGAACGTATTCACCGTGGCATTCTGATCCACGATTACTAGCGATTCCGACTTCACGGAGTCGAGTTGCAGACTCCGATCCGGACTACGACATACTTTATGAGGTCCGCTTGCTCTCGCGAGGTCGCTTCTCTTTGTATATGCCATTGTAGCACGTGTGTAGCCCTACTCGTAAGGGCCATGATGACTTGACGTCATCCCCACCTTCCTCCAGTTTATCACTGGCAGTCTCCTTTGAGTTCCCGGCCGAACCGCTGGCAACAAAGGATAAGGGTTGCGCTCGTTGCGGGACTTAACCCAACATTTCACAACACGAGCTGACGA…	1016	Pseudomonadota	Gammaproteobacteria	Enterobacterales	Enterobacteriaceae	0	0	1703	98.17	Raoultella terrigena	Raoultella	327	OTU5	0	OTU5	98.82	3 N mismatches
P1-19ET-C	OM164298	N43	Experimental/Fg-treated Silks	P	P9855HR	T	27F	0	0	AGTCGAGCGGTAGAGAGAAGCTTGCTTCTCTTGAGAGCGGCGGACGGGTGAGTAATGCCTAGGAATCTGCCTGGTAGTGGGGGATAACGTTCGGAAACGAACGCTAATACCGCATACGTCCTACGGGAGAAAGCAGGGGACCTTCGGGCCTTGCGCTATCAGATGAGCCTAGGTCGGATTAGCTAGTTGGTGAGGTAATGGCTCACCAAGGCGACGATCCGTAACTGGTCTGAGAGGATGATCAGTCACACTGGAACTGAGACACGGTCCAGACTCCTACGGGAGGCAGCAGTGGGGAATATTGGACAATGGGCGAAAGCCTGATCCAGCCATGCCGCGTGTGTGAAGAAGGTCTTCGGATTGTAAAGCACTTTAAGTTGGGAGGAAGGGCAGTTACCT…	1398	Pseudomonadota	Gammaproteobacteria	Pseudomonadales	Pseudomonadaceae	Pseudomonas	0	2499	99.64	Pseudomonas poae and Pseudomonas extremorientalis	Pseudomonas	322	OTU50	OTU50	0	100	None
P1-19EB-K	MT308740	O35	Experimental/Fg-treated Silks	P	P9855HR	B	27F	4	0.0028551	TGCNNGTCGAGCGGTAGAGAGAAGCTTGCTTCTCTTGAGAGCGGCGGACGGGTGAGTAATGCCTAGGAATCTGCCTGGTAGTGGGGGATAACGTTCGGAAACGAACGCTAATACCGCATACGTCCTACGGGAGAAAGCAGGGGACCTTCGGGCCTTGCGCTATCAGATGAGCCTAGGTCGGATTAGCTAGTTGGTGAGGTAATGGCTCACCAAGGCGACGATCCGTAACTGGTCTGAGAGGATGATCAGTCACACTGGAACTGAGACACGGTCCAGACTCCTACGGGAGGCAGCAGTGGGGAATATTGGACAATGGGCGAAAGCCTGATCCAGCCATGCCGCGTGTGTGAAGAAGGTCTTCGGATTGTAAAGCACTTTAAGTTGGGAGGAAGGGCAGTT…	1401	Pseudomonadota	Gammaproteobacteria	Pseudomonadales	Pseudomonadaceae	Pseudomonas	Pseudomonas extremorientalis	2543	99.57	Pseudomonas extremorientalis	Pseudomonas	322&323	OTU50	OTU50	0	100	none
L1-19EB-I	MT308742	O45	Experimental/Fg-treated Silks	L	P9855HR	B	27F	1	0.000715308	AGTCGAGCGGTAGAGAGAAGCTTGCTTCTCTTGAGAGCGGCGGACGGGTGAGTAATGCCTAGGAATCTGCCTGGTAGTGGGGGATAACGTTCGGAAACGAACGCTAATACCGCATACGTCCTACGGGAGAAAGCAGGGGACCTTCGGGCCTTGCGCTATCAGATGAGCCTAGGTCGGATTAGCTAGTTGGTGAGGTAATGGCTCACCAAGGCGACGATCCGTAACTGGTCTGAGAGGATGATCAGTCACACTGGAACTGAGACACGGTCCAGACTCCTACGGGAGGCAGCAGTGGGGAATATTGGACAATGGGCGAAAGCCTGATCCAGCCATGCCGCGTGTGTGAAGAAGGTCTTCGGATTGTAAAGCACTTTAAGTTGGGAGGAAGGGCAGTTACCT…	1398	Pseudomonadota	Gammaproteobacteria	Pseudomonadales	Pseudomonadaceae	Pseudomonas	Pseudomonas extremorientalis	2545	99.57	Pseudomonas extremorientalis	Pseudomonas	321	OTU50	0	OTU50	99.22	2 N mismatches
L1-19EB-D	OM164354	O62	Experimental/Fg-treated Silks	L	P9855HR	B	27F	1	0.000713267	TGCAGTCGAGCGGTAGAGAGAAGCTTGCTTCTCTTGAGAGCGGCGGACGGGTGAGTAATGCCTAGGAATCTGCCTGGTAGTGGGGGATAACGTTCGGAAACGAACGCTAATACCGCATACGTCCTACGGGAGAAAGCAGGGGACCTTCGGGCCTTGCGCTATCAGATGAGCCTAGGTCGGATTAGCTAGTTGGTGAGGTAATGGCTCACCAAGGCGACGATCCGTAACTGGTCTGAGAGGATGATCAGTCACACTGGAACTGAGACACGGTCCAGACTCCTACGGGAGGCAGCAGTGGGGAATATTGGACAATGGGCGAAAGCCTGATCCAGCCATGCCGCGTGTGTGAAGAAGGTCTTCGGATTGTAAAGCACTTTAAGTTGGGAGGAAGGGCAGTTA…	1402	Pseudomonadota	Gammaproteobacteria	Pseudomonadales	Pseudomonadaceae	Pseudomonas	0	2498	99.57	Pseudomonas poae and Pseudomonas extremorientalis	Pseudomonas	322	OTU50	OTU50	0	100	None
L1-5ET-A	OM241036	Q08	Experimental/Fg-treated Silks	L	CO431	T	27F	23	0.0222437	AAGGTTAGACTAGCTACTTCTGGTGCAACCCACTCCCATGGTGTGACGGGCGGTGTGTACAAGGCCCGGGAACGTATTCACCGCGACATTCTGATTCGCGATTACTAGCGATTCCGACTTCACGCAGTCGAGTTGCAGACTGCGATCCGGACTACGATCGGTTTTATGGGATTAGCTCCACCTCGCGGCTTGGCAACCCTCTGTACCGACCATTGTAGCACGTGTGTAGCCCAGGCCGTAAGGGCCATGATGACTTGACGTCATCCCCACCTTCCTCCGGTTTGTCACCGGCAGTCTCCTTAGAGTGCCCACCATTACGTGCTGGTAACTAAGGACAAGGGTTGCGCTCGTTACGGGACTTAACCCAACATCTCACGACACGAGCTGACGACAGCCATG…	1034	Pseudomonadota	Gammaproteobacteria	Pseudomonadales	Pseudomonadaceae	Pseudomonas	0	1764	97.49	Pseudomonas tolaasii and Pseudomonas poae	Pseudomonas	323	OTU50	0	OTU50	99.21	2 N mismatches
P1-5ET-A	MT308745	Q45	Experimental/Fg-treated Silks	P	CO431	T	27F	4	0.00284698	TGCAGTCGAGCGGTAGAGAGAAGCTTGCTTCTCTTGAGAGCGGCGGACGGGTGAGTAATGCCTAGGAATCTGCCTGGTAGTGGGGGATAACGTTCGGAAACGAACGCTAATACCGCATACGTCCTACGGGAGAAAGCAGGGGACCTTCGGGCCTTGCGCTATCAGATGAGCCTAGGTCGGATTAGCTAGTTGGTGAGGTAATGGCTCACCAAGGCGACGATCCGTAACTGGTCTGAGAGGATGATCAGTCACACTGGAACTGAGACACGGTCCAGACTCCTACGGGAGGCAGCAGTGGGGAATATTGGACAATGGGCGAAAGCCTGATCCAGCCATGCCGCGTGTGTGAAGAAGGTCTTCGGATTGTAAAGCACTTTAAGTTGGGAGGAAGGGCAGTTA…	1405	Pseudomonadota	Gammaproteobacteria	Pseudomonadales	Pseudomonadaceae	Pseudomonas	Pseudomonas extremorientalis	2553	99.43	Pseudomonas extremorientalis	Pseudomonas	323	OTU50	OTU50	0	100	None
L1-4ET-H	OM241001	R49	Experimental/Fg-treated Silks	L	CO432	T	27F	24	0.0251309	CATAGGAGCTTGCTCCTGATGGCGAGTGGCGAACGGGTGAGTAATATATCGGAACGTGCCCTAGAGTGGGGGATAACTAGTCGAAAGACTAGCTAATACCGCATACGATCTACGGATGAAAGTGGGGGATCGCAAGACCTCATGCTCCTGGAGCGGCCGATATCTGATTAGCTAGTTGGTGGGGTAAAAGCCTACCAAGGCAACGATCAGTAGCTGGTCTGAGAGGACGACCAGCCACACTGGGACTGAGACACGGCCCAGACTCCTACGGGAGGCAGCAGTGGGGAATTTTGGACAATGGGGGCAACCCTGATCCAGCAATGCCGCGTGAGTGAAGAAGGCCTTCGGGTTGTAAAGCTCTTTTGTCAGGGAAGAAACGGTAGTAGCTAATATCTATTA…	955	Pseudomonadota	Betaproteobacteria	Burkholderiales	Oxalobacteraceae	Herbaspirillum	0	1646	96.97	Herbaspirillum aquaticum	Herbaspirillum	114	OTU7	0	OTU7	99.21	2 N mismatches
L1-11EB-Z	OM164206	G24	Experimental/Fg-treated Silks	L	CO452	B	27F	0	0	TCGGACGCTGACGAGTGGCGAACGGGTGAGTAATACATCGGAACGTGCCCAGTCGTGGGGGATAACTACTCGAAAGAGTAGCTAATACCGCATACGATCTGAGGATGAAAGCGGGGGACCTTCGGGCCTCGCGCGATTGGAGCGGCCGATGGCAGATTAGGTAGTTGGTGGGATAAAAGCTTACCAAGCCGACGATCTGTAGCTGGTCTGAGAGGACGACCAGCCACACTGGGACTGAGACACGGCCCAGACTCCTACGGGAGGCAGCAGTGGGGAATTTTGGACAATGGGCGAAAGCCTGATCCAGCAATGCCGCGTGCAGGATGAAGGCCTTCGGGTTGTAAACTGCTTTTGTACGGAACGAAAAAGCTCCTTCTAATACAGGGGGCCCATGACGGT…	1371	Pseudomonadota	Betaproteobacteria	Burkholderiales	Comamonadaceae	Delftia	Delftia lacustris	2464	99.85	Delftia lacustris	Delftia	70	OTU8	OTU8	0	100	None
L1-12ET-C	MT777192	L45	Experimental/Fg-treated Silks	L	CO448	T	27F	2	0.00148258	CGGACGCTGACGAGTGGCGAACGGGTGAGTAATACATCGGAACGTGCCCAGTCGTGGGGGATAACTACTCGAAAGAGTAGCTAATACCGCATACGATCTGAGGATGAAAGCGGGGGACCTTCGGGCCTCGCGCGATTGGAGCGGCCGATGGCAGATTAGGTAGTTGGTGGGATAAAAGCTTACCAAGCCGACGATCTGTAGCTGGTCTGAGAGGACGACCAGCCACACTGGGACTGAGACACGGCCCAGACTCCTACGGGAGGCAGCAGTGGGGAATTTTGGACAATGGGCGAAAGCCTGATCCAGCAATGCCGCGTGCAGGATGAAGGCCTTCGGGTTGTAAACTGCTTTTGTACGGAACGAAAAAGCTTCTCCTAATACGAGAGGCCCATGACGGTA…	1349	Pseudomonadota	Betaproteobacteria	Burkholderiales	Comamonadaceae	Delftia	Delftia acidovorans	2479	99.85	Delftia acidovorans	Delftia	62&392	OTU8	OTU8	0	100	None
L1-2ET-G	MT308738	L59	Experimental/Fg-treated Silks	L	CO441	T	27F	3	0.00214592	GTCGNACGGTAACAGGNNCTTCGGACGCTGACGAGTGGCGAACGGGTGAGTAATACATCGGAACGTGCCCAGTCGTGGGGGATAACTACTCGAAAGAGTAGCTAATACCGCATACGATCTGAGGATGAAAGCGGGGGACCTTCGGGCCTCGCGCGATTGGAGCGGCCGATGGCAGATTAGGTAGTTGGTGGGATAAAAGCTTACCAAGCCGACGATCTGTAGCTGGTCTGAGAGGACGACCAGCCACACTGGGACTGAGACACGGCCCAGACTCCTACGGGAGGCAGCAGTGGGGAATTTTGGACAATGGGCGAAAGCCTGATCCAGCAATGCCGCGTGCAGGATGAAGGCCTTCGGGTTGTAAACTGCTTTTGTACGGAACGAAAAAGCTTCTCCTAA…	1398	Pseudomonadota	Betaproteobacteria	Burkholderiales	Comamonadaceae	Delftia	Delftia acidovorans	2564	99.71	Delftia acidovorans	Delftia	62	OTU8	OTU8	0	100	none
L1-11ET-N	MT308739	L67	Experimental/Fg-treated Silks	L	CO452	T	27F	1	0.000712758	TGCAGTCGAACGGTAACAGGTNCTTCGGACGCTGACGAGTGGCGAACGGGTGAGTAATACATCGGAACGTGCCCAGTCGTGGGGGATAACTACTCGAAAGAGTAGCTAATACCGCATACGATCTGAGGATGAAAGCGGGGGACCTTCGGGCCTCGCGCGATTGGAGCGGCCGATGGCAGATTAGGTAGTTGGTGGGATAAAAGCTTACCAAGCCGACGATCTGTAGCTGGTCTGAGAGGACGACCAGCCACACTGGGACTGAGACACGGCCCAGACTCCTACGGGAGGCAGCAGTGGGGAATTTTGGACAATGGGCGAAAGCCTGATCCAGCAATGCCGCGTGCAGGATGAAGGCCTTCGGGTTGTAAACTGCTTTTGTACGGAACGAAAAAGCTTCTC…	1403	Pseudomonadota	Betaproteobacteria	Burkholderiales	Comamonadaceae	Delftia	Delftia acidovorans	2504	99.86	Delftia acidovorans	Delftia	392	OTU8	OTU8	0	100	none
L1-12ET-F	OM164279	M30	Experimental/Fg-treated Silks	L	CO448	T	27F	2	0.00147601	CGGACGCTGACGAGTGGCGAACGGGTGAGTAATACATCGGAACGTGCCCAGTCGTGGGGGATAACTACTCGAAAGAGTAGCTAATACCGCATACGATCTGAGGATGAAAGCGGGGGACCTTCGGGCCTCGCGCGATTGGAGCGGCCGATGGCAGATTAGGTAGTTGGTGGGATAAAAGCTTACCAAGCCGACGATCTGTAGCTGGTCTGAGAGGACGACCAGCCACACTGGGACTGAGACACGGCCCAGACTCCTACGGGAGGCAGCAGTGGGGAATTTTGGACAATGGGCGAAAGCCTGATCCAGCAATGCCGCGTGCAGGATGAAGGCCTTCGGGTTGTAAACTGCTTTTGTACGGAACGAAAAAGCTTCTCCTAATACGAGAGGCCCATGACGGTA…	1355	Pseudomonadota	Betaproteobacteria	Burkholderiales	Comamonadaceae	Delftia	Delftia acidovorans	2486	99.78	Delftia acidovorans	Delftia	65	OTU8	0	OTU8	99.61	1 N mismatch
L1-11ET-B	MT777200	M38	Experimental/Fg-treated Silks	L	CO452	T	27F	4	0.00289017	CTTCGGACGCTGACGAGTGGCGAACGGGTGAGTAATACATCGGAACGTGCCCAGTCGTGGGGGATAACTACTCGAAAGAGTAGCTAATACCGCATACGATCTGAGGATGAAAGCGGGGGACCTTCGGGCCTCGCGCGATTGGAGCGGCCGATGGCAGATTAGGTAGTTGGTGGGATAAAAGCTTACCAAGCCGACGATCTGTAGCTGGTCTGAGAGGACGACCAGCCACACTGGGACTGAGACACGGCCCAGACTCCTACGGGAGGCAGCAGTGGGGAATTTTGGACAATGGGCGAAAGCCTGATCCAGCAATGCCGCGTGCAGGATGAAGGCCTTCGGGTTGTAAACTGCTTTTGTACGGAACGAAAAAGCTTCTCCTAATACGAGAGGCCCATGACG…	1384	Pseudomonadota	Betaproteobacteria	Burkholderiales	Comamonadaceae	Delftia	Delftia acidovorans	2459	99.71	Delftia acidovorans	Delftia	62	OTU8	OTU8	0	100	None
P1-11ET-H	MT308748	S13	Experimental/Fg-treated Silks	P	CO452	T	27F	3	0.00214133	AGTCGAACGGTAACNGGTNCTTCGGACGCTGACGAGTGGCGAACGGGTGAGTAATACATCGGAACGTGCCCAGTCGTGGGGGATAACTACTCGAAAGAGTAGCTAATACCGCATACGATCTGAGGATGAAAGCGGGGGACCTTCGGGCCTCGCGCGATTGGAGCGGCCGATGGCAGATTAGGTAGTTGGTGGGATAAAAGCTTACCAAGCCGACGATCTGTAGCTGGTCTGAGAGGACGACCAGCCACACTGGGACTGAGACACGGCCCAGACTCCTACGGGAGGCAGCAGTGGGGAATTTTGGACAATGGGCGAAAGCCTGATCCAGCAATGCCGCGTGCAGGATGAAGGCCTTCGGGTTGTAAACTGCTTTTGTACGGAACGAAAAAGCTTCTCCTA…	1401	Pseudomonadota	Betaproteobacteria	Burkholderiales	Comamonadaceae	Delftia	0	2566	99.71	Delftia acidovorans	Delftia	62	OTU8	OTU8	0	100	None
L1-13ET-C	MT308752	U82	Experimental/Fg-treated Silks	L	CO444	T	27F	1	0.00074239	CGGACGCTGACGAGTGGCGAACGGGTGAGTAATACATCGGAACGTGCCCAGTCGTGGGGGATAACTACTCGAAAGAGTAGCTAATACCGCATACGATCTGAGGATGAAAGCGGGGGACCTTCGGGCCTCGCGCGATTGGAGCGGCCGATGGCAGATTAGGTAGTTGGTGGGATAAAAGCTTACCAAGCCGACGATCTGTAGCTGGTCTGAGAGGACGACCAGCCACACTGGGACTGAGACACGGCCCAGACTCCTACGGGAGGCAGCAGTGGGGAATTTTGGACAATGGGCGAAAGCCTGATCCAGCAATGCCGCGTGCAGGATGAAGGCCTTCGGGTTGTAAACTGCTTTTGTACGGAACGAAAAAGCTTCTCCTAATACGAGAGGCCCATGACGGTA…	1347	Pseudomonadota	Betaproteobacteria	Burkholderiales	Comamonadaceae	Delftia	Delftia acidovorans	2422	99.85	Delftia acidovorans	Delftia	63	OTU8	OTU8	0	100	None
L1-13ET-D	MT305794	U83	Experimental/Fg-treated Silks	L	CO444	T	27F	27	0.0273279	TCGGACGCTGACGAGTGGCGAACGGGTGAGTAATACATCGGAACGTGCCCAGTCGTGGGGGATAACTACTCGAAAGAGTAGCTAATACCGCATACGATCTGAGGATGAAAGCGGGGGACCTTCGGGCCTCGCGCGATTGGAGCGGCCGATGGCAGATTAGGTAGTTGGTGGGATAAAAGCTTACCAAGCCGACGATCTGTAGCTGGTCTGAGAGGACGACCAGCCACACTGGGACTGAGACACGGCCCAGACTCCTACGGGAGGCAGCAGTGGGGAATTTTGGACAATGGGCGAAAGCCTGATCCAGCAATGCCGCGTGCAGGATGAAGGCCTTCGGGTTGTAAACTGCTTTTGTACGGAACGAAAAAGCTTCTCCTAATACGAGAGGCCCATGACGGT…	988	Pseudomonadota	Betaproteobacteria	Burkholderiales	Comamonadaceae	0	0	1661	97.17	Delftia acidovorans	Delftia	62&63&67&392	OTU8	0	OTU8	99.61Forward	1 N mismatch
L1-13ET-H	MT308753	U84	Experimental/Fg-treated Silks	L	CO444	T	27F	1	0.00074239	CGGACGCTGACGAGTGGCGAACGGGTGAGTAATACATCGGAACGTGCCCAGTCGTGGGGGATAACTACTCGAAAGAGTAGCTAATACCGCATACGATCTGAGGATGAAAGCGGGGGACCTTCGGGCCTCGCGCGATTGGAGCGGCCGATGGCAGATTAGGTAGTTGGTGGGATAAAAGCTTACCAAGCCGACGATCTGTAGCTGGTCTGAGAGGACGACCAGCCACACTGGGACTGAGACACGGCCCAGACTCCTACGGGAGGCAGCAGTGGGGAATTTTGGACAATGGGCGAAAGCCTGATCCAGCAATGCCGCGTGCAGGATGAAGGCCTTCGGGTTGTAAACTGCTTTTGTACGGAACGAAAAAGCTTCTCCTAATACGAGAGGCCCATGACGGTA…	1347	Pseudomonadota	Betaproteobacteria	Burkholderiales	Comamonadaceae	Delftia	Delftia acidovorans	2417	99.85	Delftia acidovorans	Delftia	63	OTU8	OTU8	0	100	None
L1-13ET-J	MT308754	U86	Experimental/Fg-treated Silks	L	CO444	T	27F	0	0	CGGACGCTGACGAGTGGCGAACGGGTGAGTAATACATCGGAACGTGCCCAGTCGTGGGGGATAACTACTCGAAAGAGTAGCTAATACCGCATACGATCTGAGGATGAAAGCGGGGGACCTTCGGGCCTCGCGCGATTGGAGCGGCCGATGGCAGATTAGGTAGTTGGTGGGATAAAAGCTTACCAAGCCGACGATCTGTAGCTGGTCTGAGAGGACGACCAGCCACACTGGGACTGAGACACGGCCCAGACTCCTACGGGAGGCAGCAGTGGGGAATTTTGGACAATGGGCGAAAGCCTGATCCAGCAATGCCGCGTGCAGGATGAAGGCCTTCGGGTTGTAAACTGCTTTTGTACGGAACGAAAAAGCTTCTCCTAATACGAGAGGCCCATGACGGTA…	1348	Pseudomonadota	Betaproteobacteria	Burkholderiales	Comamonadaceae	Delftia	Delftia acidovorans	2427	99.93	Delftia acidovorans	Delftia	63	OTU8	OTU8	0	100	None
P1-13ET-P	MT308755	V15	Experimental/Fg-treated Silks	P	CO444	T	27F	0	0	CGGACGCTGACGAGTGGCGAACGGGTGAGTAATACATCGGAACGTGCCCAGTCGTGGGGGATAACTACTCGAAAGAGTAGCTAATACCGCATACGATCTGAGGATGAAAGCGGGGGACCTTCGGGCCTCGCGCGATTGGAGCGGCCGATGGCAGATTAGGTAGTTGGTGGGATAAAAGCTTACCAAGCCGACGATCTGTAGCTGGTCTGAGAGGACGACCAGCCACACTGGGACTGAGACACGGCCCAGACTCCTACGGGAGGCAGCAGTGGGGAATTTTGGACAATGGGCGAAAGCCTGATCCAGCAATGCCGCGTGCAGGATGAAGGCCTTCGGGTTGTAAACTGCTTTTGTACGGAACGAAAAAGCTTCTCCTAATACGAGAGGCCCATGACGGTA…	1348	Pseudomonadota	Betaproteobacteria	Burkholderiales	Comamonadaceae	Delftia	Delftia acidovorans	2432	100	Delftia acidovorans	Delftia	62&392	OTU8	OTU8	0	100	None
P1-16ET-G	MT305796	V17	Experimental/Fg-treated Silks	P	CO462	T	27F	29	0.0282651	CTTCGGACGCTGACGAGTGGCGAACGGGTGAGTAATACATCGGAACGTGCCCAGTCGTGGGGGATAACTACTCGAAAGAGTAGCTAATACCGCATACGATCTGAGGATGAAAGCGGGGGACCTTCGGGCCTCGCGCGATTGGAGCGGCCGATGGCAGATTAGGTAGTTGGTGGGATAAAAGCTTACCAAGCCGACGATCTGTAGCTGGTCTGAGAGGACGACCAGCCACACTGGGACTGAGACACGGCCCAGACTCCTACGGGAGGCAGCAGTGGGGAATTTTGGACAATGGGCGAAAGCCTGATCCAGCAATGCCGCGTGCAGGATGAAGGCCTTCGGGTTGTAAACTGCTTTTGTACGGAACGAAAAAGCTTCTCCTAATACGAGAGGCCCATGACG…	1026	Pseudomonadota	Betaproteobacteria	Burkholderiales	Comamonadaceae	Delftia	Delftia acidovorans	1728	96.89	Delftia acidovorans	Delftia	62&63&392	OTU8	0	OTU8	99.61Forward	1 N mismatch
P1-13ET-G	MT777189	V57	Experimental/Fg-treated Silks	P	CO444	T	27F	2	0.00248139	CTTCGGACGCTGACGAGTGGCGAACGGGTGAGTAATACATCGGAACGTGCCCAGTCGTGGGGGATAACTACTCGAAAGAGTAGCTAATACCGCATACGATCTGAGGATGAAAGCGGGGGACCTTCGGGCCTCGCGCGATTGGAGCGGCCGATGGCAGATTAGGTAGTTGGTGGGATAAAAGCTTACCAAGCCGACGATCTGTAGCTGGTCTGAGAGGACGACCAGCCACACTGGGACTGAGACACGGCCCAGACTCCTACGGGAGGCAGCAGTGGGGAATTTTGGACAATGGGCGAAAGCCTGATCCAGCAATGCCGCGTGCAGGATGAAGGCCTTCGGGTTGTAAACTGCTTTTGTACGGAACGAAAAAGCTTCTCCTAATACGAGAGGCCCATGACG…	806	Pseudomonadota	Betaproteobacteria	Burkholderiales	Comamonadaceae	Delftia	Delftia acidovorans	1447	99.75	Delftia acidovorans	Delftia	62&63&65&392	OTU8	0	OTU8	99.61Forward	1 N mismatch
L1-1EB-H	MT308743	P23	Experimental/Fg-treated Silks	L	CO449	B	27F	3	0.00214592	TGCAGTCGAACGGTAACAGGNNCTTCGGATGCTGACGAGTGGCGAACGGGTGAGTAACACATCGGAACGTGCCTAGTAGTGGGGGATAACTACTCGAAAGAGTAGCTAATACCGCATGAGATCTAAGGATGAAAGCAGGGGACCTTCGGGCCTTGCGCTACTAGAGCGGCTGATGGCAGATTAGGTAGTTGGTGGGATAAAAGCTTACCAAGCCGACGATCTGTAGCTGGTCTGAGAGGACGACCAGCCACACTGGGACTGAGACACGGCCCAGACTCCTACGGGAGGCAGCAGTGGGGAATTTTGGACAATGGGCGAAAGCCTGATCCAGCAATGCCGCGTGTAGGATGAAGGCCCTCGGGTTGTAAACTACTTTTGTACGGAACGAAAAGCTCTCTT…	1398	Pseudomonadota	Betaproteobacteria	Burkholderiales	Comamonadaceae	Comamonas	0	2457	98.84	Comamonas sediminis	Comamonas	54	OTU9	OTU9	0	100	None
L1-1ET-H	MT355375	U61	Experimental/Fg-treated Silks	L	CO449	T	27F	0	0	TCGGATGCTGACGAGTGGCGAACGGGTGAGTAACACATCGGAACGTGCCTAGTAGTGGGGGATAACTACTCGAAAGAGTAGCTAATACCGCATGAGATCTAAGGATGAAAGCAGGGGACCTTCGGGCCTTGCGCTACTAGAGCGGCTGATGGCAGATTAGGTAGTTGGTGGGATAAAAGCTTACCAAGCCGACGATCTGTAGCTGGTCTGAGAGGACGACCAGCCACACTGGGACTGAGACACGGCCCAGACTCCTACGGGAGGCAGCAGTGGGGAATTTTGGACAATGGGCGAAAGCCTGATCCAGCAATGCCGCGTGTAGGATGAAGGCCCTCGGGTTGTAAACTACTTTTGTACGGAACGAAAAGCTCTCTTCTAATAAAGGAGAGTGATGACGGT…	1348	Pseudomonadota	Betaproteobacteria	Burkholderiales	Comamonadaceae	Comamonas	Comamonas sediminis	2361	98.96	Comamonas sediminis	Comamonas	54	OTU9	OTU9	0	100	None
L1-1ET-L	OM164535	U65	Experimental/Fg-treated Silks	L	CO449	T	27F	3	0.00214746	TGCAGTCGNNCGGTAACANGTCTTCGGATGCTGACGAGTGGCGAACGGGTGAGTAACACATCGGAACGTGCCTAGTAGTGGGGGATAACTACTCGAAAGAGTAGCTAATACCGCATGAGATCTAAGGATGAAAGCAGGGGACCTTCGGGCCTTGCGCTACTAGAGCGGCTGATGGCAGATTAGGTAGTTGGTGGGATAAAAGCTTACCAAGCCGACGATCTGTAGCTGGTCTGAGAGGACGACCAGCCACACTGGGACTGAGACACGGCCCAGACTCCTACGGGAGGCAGCAGTGGGGAATTTTGGACAATGGGCGAAAGCCTGATCCAGCAATGCCGCGTGTAGGATGAAGGCCCTCGGGTTGTAAACTACTTTTGTACGGAACGAAAAGCTCTCTTC…	1397	Pseudomonadota	Betaproteobacteria	Burkholderiales	Comamonadaceae	Comamonas	Comamonas sediminis	2424	98.71	Comamonas sediminis	Comamonas	54	OTU9	OTU9	0	100	None
L1-16ET-F	MT355376	U69	Experimental/Fg-treated Silks	L	CO462	T	27F	1	0.000742942	TCGGATGCTGACGAGTGGCGAACGGGTGAGTAACACATCGGAACGTGCCTAGTAGTGGGGGATAACTACTCGAAAGAGTAGCTAATACCGCATGAGATCTAAGGATGAAAGCAGGGGACCTTCGGGCCTTGCGCTACTAGAGCGGCTGATGGCAGATTAGGTAGTTGGTGGGATAAAAGCTTACCAAGCCGACGATCTGTAGCTGGTCTGAGAGGACGACCAGCCACACTGGGACTGAGACACGGCCCAGACTCCTACGGGAGGCAGCAGTGGGGAATTTTGGACAATGGGCGAAAGCCTGATCCAGCAATGCCGCGTGTAGGATGAAGGCCCTCGGGTTGTAAACTACTTTTGTACGGAACGAAAAGCTCTCTTCTAATAAAGGAGAGTGATGACGGT…	1346	Pseudomonadota	Betaproteobacteria	Burkholderiales	Comamonadaceae	Comamonas	Comamonas sediminis	2350	98.89	Comamonas sediminis	Comamonas	54	OTU9	OTU9	0	100	None
L1-16ET-O	MT308756	V31	Experimental/Fg-treated Silks	L	CO462	T	27F	16	0.0119048	GATGCTGACGAGTGGCGAACGGGTGAGTAACACATCGGAACGTGCCTAGTAGTGGGGGATAACTACTCGAAAGAGTAGCTAATACCGCATGAGATCTAAGGATGAAAGCAGGGGACCTTCGGGCCTTGCGCTACTAGAGCGGCTGATGGCAGATTAGGTAGTTGGTGGGATAAAAGCTTACCAAGCCGACGATCTGTAGCTGGTCTGAGAGGACGACCAGCCACACTGGGACTGAGACACGGCCCAGACTCCTACGGGAGGCAGCAGTGGGGAATTTTGGACAATGGGCGAAAGCCTGATCCAGCAATGCCGCGTGTAGGATGAAGGCCCTCGGGTTGTAAACTACTTTTGTACGGAACGAAAAGCTCTCTTCTAATAAAGGAGAGTGATGACGGTACC…	1344	Pseudomonadota	Betaproteobacteria	Burkholderiales	Comamonadaceae	0	0	2267	97.47	Comamonas sediminis	Comamonas	53	OTU9	OTU9	0	100	None
P1-1ET-G	MT308757	V34	Experimental/Fg-treated Silks	P	CO449	T	27F	2	0.00145773	TCGGATGCTGACGAGTGGCGAACGGGTGAGTAACACATCGGAACGTGCCTAGTAGTGGGGGATAACTACTCGAAAGAGTAGCTAATACCGCATGAGATCTAAGGATGAAAGCAGGGGACCTTCGGGCCTTGCGCTACTAGAGCGGCTGATGGCAGATTAGGTAGTTGGTGGGATAAAAGCTTACCAAGCCGACGATCTGTAGCTGGTCTGAGAGGACGACCAGCCACACTGGGACTGAGACACGGCCCAGACTCCTACGGGAGGCAGCAGTGGGGAATTTTGGACAATGGGCGAAAGCCTGATCCAGCAATGCCGCGTGTAGGATGAAGGCCCTCGGGTTGTAAACTACTTTTGTACGGAACGAAAAGCTCTCTTCTAATAAAGGAGAGTGATGACGGT…	1372	Pseudomonadota	Betaproteobacteria	Burkholderiales	Comamonadaceae	Comamonas	Comamonas sediminis	2391	98.76	Comamonas sediminis	Comamonas	54	OTU9	OTU9	0	100	None
P1-1ET-Q	MT308758	V37	Experimental/Fg-treated Silks	P	CO449	T	27F	7	0.005	TGCAGTCGNNCGGTAACAGGNNCTTCGGATGCTGACGAGTGGCGAACGGGTGAGTAACACATCGGAACGTGCCTAGTAGTGGGGGATAACTACTCGAAAGAGTAGCTAATACCGCATGAGATCTAAGGATGAAAGCAGGGGACCTTCGGGCCTTGCGCTACTAGAGCGGCTGATGGCAGATTAGGTAGTTGGTGGGATAAAAGCTTACCAAGCCGACGATCTGTAGCTGGTCTGAGAGGACGACCAGCCACACTGGGACTGAGACACGGCCCAGACTCCTACGGGAGGCAGCAGTGGGGAATTTTGGACAATGGGCGAAAGCCTGATCCAGCAATGCCGCGTGTAGGATGAAGGCCCTCGGGTTGTAAACTACTTTTGTACGGAACGAAAAGCTCTCTT…	1400	Pseudomonadota	Betaproteobacteria	Burkholderiales	Comamonadaceae	0	0	2398	98.43	Comamonas sediminis	Comamonas	54	OTU9	OTU9	0	100	None
P1-1ET-F	MT305799	V44	Experimental/Fg-treated Silks	P	CO449	T	27F	24	0.023622	TGCAGTCGAACGGTAACAGGTCTTCGGATGCTGACGAGTGGCGAACGGGTGAGTAACACATCGGAACGTGCCTAGTAGTGGGGGATAACTACTCGAAAGAGTAGCTAATACCGCATGAGATCTAAGGATGAAAGCAGGGGACCTTCGGGCCTTGCGCTACTAGAGCGGCTGATGGCAGATTAGGTAGTTGGTGGGATAAAAGCTTACCAAGCCGACGATCTGTAGCTGGTCTGAGAGGACGACCAGCCACACTGGGACTGAGACACGGCCCAGACTCCTACGGGAGGCAGCAGTGGGGAATTTTGGACAATGGGCGAAAGCCTGATCCAGCAATGCCGCGTGTAGGATGAAGGCCCTCGGGTTGTAAACTACTTTTGTACGGAACGAAAAGCTCTCTTC…	1016	Pseudomonadota	Betaproteobacteria	Burkholderiales	Comamonadaceae	0	0	1645	95.78	Comamonas sediminis	Comamonas	54	OTU9	0	OTU9	98.43Forward	4 N mismatches
P1-1ET-H	OM241081	V45	Experimental/Fg-treated Silks	P	CO449	T	27F	16	0.0157171	GTAGCGCCCTCCTTGCGGTTAGGCTACCTACTTCTGGCGAGACCCGCTCCCATGGTGTGACGGGCGGTGTGTACAAGACCCGGGAACGTATTCACCGTGACATTCTGATCCACGATTACTAGCGATTCCGACTTCACGCAGTCGAGTTGCAGACTGCGATCCGGACTACGACTGGCTTTATGGGATTAGCTCCCCCTCGCGGGTTGGCAACCCTTTGTACCAGCCATTGTATGACGTGTGTAGCCCCACCTATAAGGGCCATGAGGACTTGACGTCATCCCCACCTTCCTCCGGTTTGTCACCGGCAGTCCCATTAGAGTGCCCTTTCGTAGCAACTAATGGCAAGGGTTGCGCTCGTTGCGGGACTTAACCCAACATCTCACGACACGAGCTGACGAC…	1018	Pseudomonadota	Betaproteobacteria	Burkholderiales	Comamonadaceae	0	0	1716	97.25	Comamonas sediminis	Comamonas	54	OTU9	0	OTU9	97.24	7 N mismatches
P1-16ET-H	MT305797	V18	Experimental/Fg-treated Silks	P	CO462	T	27F	8	0.00792864	GTCGGCTGCGTCCTTGCGGTTCGCTCACCGGCTTCGGGTCAAACCAACTCCCATGGTGTGACGGGCGGTGTGTACAAGGCCCGGGAACGTATTCACCGCGGCATGCTGATCCGCGATTACTAGCGATTCCACCTTCATGTACTCGAGTTGCAGAGTACAATCCGAACTGAGACGGCTTTTAGAGATCGGCATGATGTCACCATCTAGCTTCCCACTGTCACCGCCATTGTAGCACGTGTGTAGCCCAGGACATAAGGGCCATGAGGACTTGACGTCATCCCCACCTTCCTCCGGCTTGTCACCGGCAGTTCCTCTAGAGTGCCCACCCAAACGTGCTGGCAACTAAAGGCGAGGGTTGCGCTCGTTGCGGGACTTAACCCAACATCTCACGACACGAGC…	1009	Pseudomonadota	Alphaproteobacteria	Rhodospirillales	Acetobacteraceae	Asaia	0	1781	99.01	Asaia (many)*	Asaia	15
L1-16ET-J	MT777237	V59	Experimental/Fg-treated Silks	L	CO462	T	27F	0	0	TGCAGTCGCACGGACCTTTCGGGGTGAGTGGCGGACGGGTGAGTATCGCGTAGGGATCTATCCACGGGTGGGGGATAACATCGGGAAACTGGTGCTAATACCGCATGATACCTGAGGGTCAAAGGCGCAAGTCGCCTGTGGAGGAGCCTGCGTTCGATTAGCTTGTTGGTGGGGTAAAGGCCTACCAAGGCGATGATCGATAGCTGGTCTGAGAGGATGATCAGCCACACTGGGACTGAGACACGGCCCAGACTCCTACGGGAGGCAGCAGTGGGGAATATTGGACAATGGGCGAAAGCCTGATCCAGCAATGCCGCGTGTGTGAAGAAGGTCTTCGGATTGTAAAGCACTTTCGACGGGGACGATGATGACGGTACCCGTAGAAGAAGCCCCGGCTAA…	1357	Pseudomonadota	Alphaproteobacteria	Rhodospirillales	Acetobacteraceae	Asaia	0	2438	99.93	Asaia platycodi/ Asaia spathodeae *	Asaia	15
L1-16ET-C	MT305800	V62	Experimental/Fg-treated Silks	L	CO462	T	27F	34	0.0326609	ATGCAGTCGCACGGACCTTTCGGGGTGAGTGGCGGACGGGTGAGTATCGCGTAGGGATCTATCCACGGGTGGGGGATAACATCGGGAAACTGGTGCTAATACCGCATGATACCTGAGGGTCAAAGGCGCAAGTCGCCTGTGGAGGAGCCTGCGTTCGATTAGCTTGTTGGTGGGGTAAAGGCCTACCAAGGCGATGATCGATAGCTGGTCTGAGAGGATGATCAGCCACACTGGGACTGAGACACGGCCCAGACTCCTACGGGAGGCAGCAGTGGGGAATATTGGACAATGGGCGAAAGCCTGATCCAGCAATGCCGCGTGTGTGAAGAAGGTCTTCGGATTGTAAAGCACTTTCGACGGGGACGATGATGACGGTACCCGTAGAAGAAGCCCCGGCTA…	1041	Pseudomonadota	Alphaproteobacteria	Rhodospirillales	Acetobacteraceae	0	0	1719	96.27	Asaia prunellae/ Asaia spathodeae*	Asaia	15
P1-6ET-I	OM164410	Q41	Experimental/Fg-treated Silks	P	CO430	T	27F	0	0	TGCAGTCGAACGGTAGCACAGAGAGCTTGCTCTCGGGTGACGAGTGGCGGACGGGTGAGTAATGTCTGGGAAACTGCCCGATGGAGGGGGATAACTACTGGAAACGGTAGCTAATACCGCATAACGTCGCAAGACCAAAGTGGGGGACCTTCGGGCCTCACACCATCGGATGTGCCCAGATGGGATTAGCTAGTAGGTGGGGTAATGGCTCACCTAGGCGACGATCCCTAGCTGGTCTGAGAGGATGACCAGCCACACTGGAACTGAGACACGGTCCAGACTCCTACGGGAGGCAGCAGTGGGGAATATTGCACAATGGGCGCAAGCCTGATGCAGCCATGCCGCGTGTATGAAGAAGGCCTTCGGGTTGTAAAGTACTTTCAGCGGGGAGGAAGGCGG…	1403	Pseudomonadota	Gammaproteobacteria	Enterobacterales	Enterobacteriaceae	0	0	2440	98.64	Kluyvera intermedia	Kluyvera	148
P1-17ET-F	OM164468	S47	Experimental/Fg-treated Silks	P	P35837	T	27F	1	0.000711238	TGCAAGTCGAACGGTAGCACAGAGAGCTTGCTCTCGGGTGACGAGTGGCGGACGGGTGAGTAACGTCTGGGAAACTGCCCGATGGAGGGGGATAACTACTGGAAACGGTAGCTAATACCGCATAACGTCGCAAGACCAAAGTGGGGGACCTTCGGGCCTCACACCATCGGATGTGCCCAGATGGGATTAGCTAGTAGGTGGGGTAATGGCTCACCTAGGCGACGATCCCTAGCTGGTCTGAGAGGATGACCAGCCACACTGGAACTGAGACACGGTCCAGACTCCTACGGGAGGCAGCAGTGGGGAATATTGCACAATGGGCGCAAGCCTGATGCAGCCATGCCGCGTGTATGAAGAAGGCCTTCGGGTTGTAAAGTACTTTCAGCGGGGAGGAAGGCG…	1406	Pseudomonadota	Gammaproteobacteria	Enterobacterales	Enterobacteriaceae	0	0	2479	98.51	Kluyvera intermedia	Kluyvera	147
L1-3ET-D	OM164281	M34	Experimental/Fg-treated Silks	L	CO433	T	27F	3	0.00212164	ATGCAGTCGAGCGGTAGCACAGAGAGCTTGCTCTCGGGTGACGAGCGGCGGACGGGTGAGTAATGTCTGGGAAACTGCCTGATGGAGGGGGATAACTACTGGAAACGGTAGCTAATACCGCATAACGTCGCAAGACCAAAGTGGGGGACCTTCGGGCCTCATGCCATCAGATGTGCCCAGATGGGATTAGCTAGTAGGTGGGGTAATGGCTCACCTAGGCGACGATCCCTAGCTGGTCTGAGAGGATGACCAGCCACACTGGAACTGAGACACGGTCCAGACTCCTACGGGAGGCAGCAGTGGGGAATATTGCACAATGGGCGCAAGCCTGATGCAGCCATGCCGCGTGTATGAAGAAGGCCTTCGGGTTGTAAAGTACTTTCAGCGAGGAGGAAGGCA…	1414	Pseudomonadota	Gammaproteobacteria	Enterobacterales	Enterobacteriaceae	Raoultella	Raoultella ornithinolytica	2566	99.5	Raoultella ornithinolytica	Raoultella	328
P1-1EB-L	OM302469	P24	Experimental/Fg-treated Silks	P	CO449	B	27F	15	0.0126582	two shorter sequences: AGCGGCGGACGGGTGAGTAATGTCTGGGAAACTGCCTGATGGAGGGGGATAACTACTGGAAACGGTAGCTAATACCGCATAACGTCGCAAGACCAAAGTGGGGGACCTTCGGGCCTCATGCCATCAGATGTGCCCAGATGGGATTAGCTAGTAGGTGGGGTAATGGCTCACCTAGGCGACGATCCCTAGCTGGTCTGAGAGGATGACCAGCCACACTGGAACTGAGACACGGTCCAGACTCCTACGGGAGGCAGCAGTGGGGAATATTGCACAATGGGCGCAAGCCTGATGCAGCCATGCCGCGTGTATGAAGAAGGCCTTCGGGTTGTAAAGTACTTTCAGCGAGGAGGAAGGCGTTAAGGTTAATAACCTTAGT…	798&387	Pseudomonadota	Gammaproteobacteria	Enterobacterales	Enterobacteriaceae	Raoultella	Raoultella ornithinolytica	1410/710	97.99/99.74	Raoultella ornithinolytica	Raoultella	330
L1-6CB-B	OM164454	S20	Control/Healthy Silks	L	CO430	B	27F	3	0.00222883	CGGATGCTGACGAGTGGCGAACGGGTGAGTAATACATCGGAACGTGCCCGATCGTGGGGGATAACGGAGCGAAAGCTTTGCTAATACCGCATACGATCTACGGATGAAAGCAGGGGACCGCAAGGCCTTGCGCGGACGGAGCGGCCGATGGCAGATTAGGTAGTTGGTGGGATAAAAGCTTACCAAGCCGACGATCTGTAGCTGGTCTGAGAGGACGACCAGCCACACTGGGACTGAGACACGGCCCAGACTCCTACGGGAGGCAGCAGTGGGGAATTTTGGACAATGGGCGAAAGCCTGATCCAGCCATGCCGCGTGCAGGATGAAGGCCTTCGGGNTTGTAAACTGCTTTTGTACGGAACGAAAAGCCTCTTTCTAATAAAGAGAGGTCATGACGGT…	1346	Pseudomonadota	Betaproteobacteria	Burkholderiales	Comamonadaceae	Acidovorax	Acidovorax wautersii	2460	99.7	Acidovorax wautersii	Acidovorax	1
L1-11CB-N	OM164346	O47	Control/Healthy Silks	L	CO452	B	27F	2	0.00143678	TAGCTTGCTACTTTGCCGGCGAGCGGCGGACGGGTGAGTAATGTCTGGGAAACTGCCTGATGGAGGGGGATAACTACTGGAAACGGTAGCTAATACCGCATGACCTCGCAAGAGCAAAGTGGGGGACCTTCGGGCCTCACGCCATCGGATGTGCCCAGATGGGATTAGCTAGTAGGTGGGGTAATGGCTCACCTAGGCGACGATCCCTAGCTGGTCTGAGAGGATGACCAGCCACACTGGAACTGAGACACGGTCCAGACTCCTACGGGAGGCAGCAGTGGGGAATATTGCACAATGGGCGCAAGCCTGATGCAGCCATGCCGCGTGTGTGAAGAAGGCCTTAGGGTTGTAAAGCACTTTCAGCGAGGAGGAAGGGTTCAGTGTTAATAGCACTGTGCA…	1392	Pseudomonadota	Gammaproteobacteria	Enterobacterales	Yersiniaceae	0	0	2396	99.55	Rahnella victoriana	Rahnella	113
P1-5CT-B	MT777230	T43	Control/Healthy Silks	P	CO431	T	27F	3	0.00211566	CATGCAGTCGAGCGGCAGCGGGAAGTAGCTTGCTACTTTGCCGGCGAGCGGCGGACGGGTGAGTAATGTCTGGGAAACTGCCTGATGGAGGGGGATAACTACTGGAAACGGTAGCTAATACCGCATGACCTCGCAAGAGCAAAGTGGGGGACCTTCGGGCCTCACGCCATCGGATGTGCCCAGATGGGATTAGCTAGTAGGTGAGGTAATGGCTCACCTAGGCGACGATCCCTAGCTGGTCTGAGAGGATGACCAGCCACACTGGAACTGAGACACGGTCCAGACTCCTACGGGAGGCAGCAGTGGGGAATATTGCACAATGGGCGCAAGCCTGATGCAGCCATGCCGCGTGTGTGAAGAAGGCCTTAGGGTTGTAAAGCACTTTCAGCGAGGAGGAAG…	1418	Pseudomonadota	Gammaproteobacteria	Enterobacterales	Yersiniaceae	0	0	2483	98.24	Ewingella americana	Ewingella	97
L1-5CT-A	MT308750	U39	Control/Healthy Silks	L	CO431	T	27F	6	0.00439883	GTAGCTTGCTACTTTGCCGGCGAGCGGCGGACGGGTGAGTAATGTCTGGGAAACTGCCTGATGGAGGGGGATAACTACTGGAAACGGTAGCTAATACCGCATGACCTCGCAAGAGCAAAGTGGGGGACCTTCGGGCCTCACGCCATCGGATGTGCCCAGATGGGATTAGCTAGTAGGTGAGGTAATGGCTCACCTAGGCGACGATCCCTAGCTGGTCTGAGAGGATGACCAGCCACACTGGAACTGAGACACGGTCCAGACTCCTACGGGAGGCAGCAGTGGGGAATATTGCACAATGGGCGCAAGCCTGATGCAGCCATGCCGCGTGTGTGAAGAAGGCCTTAGGGTTGTAAAGCACTTTCAGCGAGGAGGAAGGGTTCAGTGTTAATAGCACTGTGC…	1364	Pseudomonadota	Gammaproteobacteria	Enterobacterales	Yersiniaceae	Rahnella	Rahnella woolbedingensis	2349	99.33	Rahnella woolbedingensis	Rahnella	326
L1-5CT-E	MT308751	U64	Control/Healthy Silks	L	CO431	T	27F	4	0.00281889	ATGCAGTCGAGCGGCAGCGGGAAGTAGCTTGCTACTTTGCCGGCGAGCGGCGGACGGGTGAGTAATGTCTGGGAAACTGCCTGATGGAGGGGGATAACTACTGGAAACGGTAGCTAATACCGCATGACCTCGCAAGAGCAAAGTGGGGGACCTTCGGGCCTCACGCCATCGGATGTGCCCAGATGGGATTAGCTAGTAGGTGAGGTAATGGCTCACCTAGGCGACGATCCCTAGCTGGTCTGAGAGGATGACCAGCCACACTGGAACTGAGACACGGTCCAGACTCCTACGGGAGGCAGCAGTGGGGAATATTGCACAATGGGCGCAAGCCTGATGCAGCCATGCCGCGTGTGTGAAGAAGGCCTTAGGGTTGTAAAGCACTTTCAGCGAGGAGGAAGG…	1419	Pseudomonadota	Gammaproteobacteria	Enterobacterales	Yersiniaceae	0	0	2406	98.1	Ewingella americana	Ewingella	96
P1-13EB-B	OM240973	T67	Experimental/Fg-treated Silks	P	CO444	B	27F	23	0.0220729	two shorter sequences: GTCGAGCGGCAGCGGGAAGTAGCTTGCTACTTTGCCGGCGAGCGGCGGACGGGTGAGTAATGTCTGGGAAACTGCCTGATGGAGGGGGATAACTACTGGAAACGGTAGCTAATACCGCATGACCTCGTAAGAGCAAAGTGGGGGACCTTCGGGCCTCACGCCATCGGATGTGCCCAGATGGGATTAGCTAGTAGGTGAGGTAATGGCTCACCTAGGCGACGATCCCTAGCTGGTCTGAGAGGATGACCAGCCACACTGGAACTGAGACACGGTCCAGACTCCTACGGGAGGCAGCAGTGGGGAATATTGCACAATGGGCGCAAGCCTGATGCAGCCATGCCGCGTGTGTGAAGAAGGCCTTAGGGTTGTAAAGCAC…	1042&243	Pseudomonadota	Gammaproteobacteria	Enterobacterales	Yersiniaceae	0	0	1745/ 152	97.74/ 69.30	Rahnella variigena	Rahnella	95
L1-13EB-B	OM164508	T76	Experimental/Fg-treated Silks	L	CO444	B	27F	2	0.00141945	CATGCAAGTCGAGCGGCAGCGGGAANTAGCTTGCTACTTTGCCGGCGAGCGGCGGACGGGTGAGTAATGTCTGGGAAACTGCCTGATGGAGGGGGATAACTACTGGAAACGGTAGCTAATACCGCATGACCTCGTAAGAGCAAAGTGGGGGACCTTCGGGCCTCACGCCATCGGATGTGCCCAGATGGGATTAGCTAGTAGGTGAGGTAATGGCTCACCTAGGCGACGATCCCTAGCTGGTCTGAGAGGATGACCAGCCACACTGGAACTGAGACACGGTCCAGACTCCTACGGGAGGCAGCAGTGGGGAATATTGCACAATGGGCGCAAGCCTGATGCAGCCATGCCGCGTGTGTGAAGAAGGCCTTAGGGTTGTAAAGCACTTTCAGCGAGGAGGAA…	1409	Pseudomonadota	Gammaproteobacteria	Enterobacterales	Yersiniaceae	0	0	2507	98.72	Ewingella americana	Ewingella	95
L1-6CB-M	OM164291	N19	Control/Healthy Silks	L	CO430	B	27F	1	0.000723066	AGCTTGCTCTCTGATTCAGCGGCGGACGGGTGAGTAATGCCTAGGAATCTGCCTAGTAGTGGGGGACAACGTTTCGAAAGGAACGCTAATACCGCATACGTCCTACGGGAGAAAGTGGGGGATCTTCGGACCTCACGCTATTAGATGAGCCTAGGTCGGATTAGCTAGTTGGTAGGGTAAAGGCCTACCAAGGCGACGATCCGTAACTGGTCTGAGAGGATGATCAGTCACACTGGAACTGAGACACGGTCCAGACTCCTACGGGAGGCAGCAGTGGGGAATATTGGACAATGGGCGCAAGCCTGATCCAGCCATGCCGCGTGTGTGAAGAAGGCCCTCGGGTCGTAAAGCACTTTAAGTTGGGAGGAAGGGCTTACAGCGAATACCTGTGAGTTTTGA…	1383	Pseudomonadota	Gammaproteobacteria	Pseudomonadales	Pseudomonadaceae	Pseudomonas	0	2443	99.2	Pseudomonas psychrotolerans and Pseudomonas oryzihabitans	Pseudomonas	306
L1-6CB-F	OM164455	S21	Control/Healthy Silks	L	CO430	B	27F	3	0.00216606	GCTTGCTCTCTGATTCAGCGGCGGACGGGTGAGTAATGCCTAGGAATCTGCCTAGTAGTGGGGGACAACGTTTCGAAAGGAACGCTAATACCGCATACGTCCTACGGGAGAAAGTGGGGGATCTTCGGACCTCACGCTATTAGATGAGCCTAGGTCGGATTAGCTAGTTGGTAGGGTAAAGGCCTACCAAGGCGACGATCCGTAACTGGTCTGAGAGGATGATCAGTCACACTGGAACTGAGACACGGTCCAGACTCCTACGGGAGGCAGCAGTGGGGAATATTGGACAATGGGCGCAAGCCTGATCCAGCCATGCCGCGTGTGTGAAGAAGGCCCTCGGGTCGTAAAGCACTTTAAGTTGGGAGGAANGGGCTTACAGCGAATACCTGTGAGTTTTGA…	1385	Pseudomonadota	Gammaproteobacteria	Pseudomonadales	Pseudomonadaceae	Pseudomonas	Pseudomonas psychrotolerans	2486	99.06	Pseudomonas psychrotolerans	Pseudomonas	306
P1-8ET-G	OM240996	V02	Experimental/Fg-treated Silks	P	CO325	T	27F	39	0.0373921	TGCAGTCGAGCGGANGAGAGGAGCTTGCTCCTCGATTCAGCGGCGGACGGGTGAGTAATGCCTAGGAATCTGCCTAGTAGTGGGGGACAACGTTTCGAAAGGAACGCTAATACCGCATACGTCCTACGGGAGAAAGTGGGGGATCTTCGGACCTCACGCTATTAGATGAGCCTAGGTCGGATTAGCTAGTTGGTAGGGTAAAGGCCTACCAAGGCGACGATCCGTAACTGGTCTGAGAGGATGATCAGTCACACTGGAACTGAGACACGGTCCAGACTCCTACGGGAGGCAGCAGTGGGGAATATTGGACAATGGGCGAAAGCCTGATCCAGCCATGCCGCGTGTGTGAAGAAGGCCCTCGGGTCGTAAAGCACTTTAAGTTGGGAGGAAGGGCTTACA…	1043	Pseudomonadota	Gammaproteobacteria	Pseudomonadales	Pseudomonadaceae	Pseudomonas	0	1718	95.14	Pseudomonas oryzihabitans/Pseudomonas psychrotolerans*	Pseudomonas	324
L1-18CT-E	OM164431	R42	Control/Healthy Silks	L	P38157	T	27F	0	0	TCGAACGGCAGCACAGAGGAGCTTGCTCCTTGGGTGGCGAGTGGCGGACGGGTGAGGAATACATCGGAATCTACTTTTTCGTGGGGGATAACGTAGGGAAACTTACGCTAATACCGCATACGACCTACGGGTGAAAGCAGGGGATCTTCGGACCTTGCGCGATTGAATGAGCCGATGTCGGATTAGCTAGTTGGCGGGGTAAAGGCCCACCAAGGCGACGATCCGTAGCTGGTCTGAGAGGATGATCAGCCACACTGGAACTGAGACACGGTCCAGACTCCTACGGGAGGCAGCAGTGGGGAATATTGGACAATGGGCGCAAGCCTGATCCAGCCATACCGCGTGGGTGAAGAAGGCCTTCGGGTTGTAAAGCCCTTTTGTTGGGAAAGAAATCCAGCC…	1403	Pseudomonadota	Gammaproteobacteria	Xanthomonadales	Xanthomonadaceae	Stenotrophomonas	Stenotrophomonas maltophilia	2472	99.07	Stenotrophomonas maltophilia	Stenotrophomonas	382
P1-16ET-K	MT355330	V21	Experimental/Fg-treated Silks	P	CO462	T	27F	35	0.0336215	TGCAGTCGAACGGCAGCACAGTAAGAGCTTGCTCTTATGGGTGGCGAGTGGCGGACGGGTGAGGAATACATCGGAATCTACTTTTTCGTGGGGGATAACGTAGGGAAACTTACGCTAATACCGCATACGACCTACGGGTGAAAGCAGGGGATCTTCGGACCTTGCGCGATTGAATGAGCCGATGTCGGATTAGCTAGTTGGCGGGGTAAAGGCCCACCAAGGCGACGATCCGTAGCTGGTCTGAGAGGATGATCAGCCACACTGGAACTGAGACACGGTCCAGACTCCTACGGGAGGCAGCAGTGGGGAATATTGGACAATGGGCGCAAGCCTGATCCAGCCATACCGCGTGGGTGAAGAAGGCCTTCGGGTTGTAAAGCCCTTTTGTTGGGAAAGAAA…	1041	Pseudomonadota	Gammaproteobacteria	Xanthomonadales	Xanthomonadaceae	0	0	1654	94.91	Stenotrophomonas tumulicola	Stenotrophomonas	376
P1-1ET-D	MT355346	V33	Experimental/Fg-treated Silks	P	CO449	T	27F	2	0.00141443	TGCAGTCGAACGGCAGCACAGTAAGAGCTTGCTCTTATGGGTGGCGAGTGGCGGACGGGTGAGGAATACATCGGAATCTACTTTTTCGTGGGGGATAACGTAGGGAAACTTACGCTAATACCGCATACGACCTACGGGTGAAAGCAGGGGATCTTCGGACCTTGCGCGATTGAATGAGCCGATGTCGGATTAGCTAGTTGGCGGGGTAAAGGCCCACCAAGGCGACGATCCGTAGCTGGTCTGAGAGGATGATCAGCCACACTGGAACTGAGACACGGTCCAGACTCCTACGGGAGGCAGCAGTGGGGAATATTGGACAATGGGCGCAAGCCTGATCCAGCCATACCGCGTGGGTGAAGAAGGCCTTCGGGTTGTAAAGCCCTTTTGTTGGGAAAGAAA…	1414	Pseudomonadota	Gammaproteobacteria	Xanthomonadales	Xanthomonadaceae	Stenotrophomonas	0	2457	98.72	Stenotrophomonas tumulicola	Stenotrophomonas	380
L1-19CB-D	MT777181	P64	Control/Healthy Silks	L	P9855HR	B	27F	5	0.00520291	TGCAGTTGAGCGCTGAGGTTGGTACTTGTACCAACTGGATGAGCAGCGAACGGGTGAGTAACGCGTGGGGAATCTGCCTTTGAGCGGGGGACAACATTTGGAAACGAATGCTAATACCGCATAAAAACTTTAAACACAAGTTTTAAGTTTGAAAGATGCAATTGCATCACTCAAAGATGATCCCGCGTTGTATTAGCTAGTTGGTGAGGTAAAGGCTCACCAAGGCGATGATACATAGCCGACCTGAGAGGGTGATCGGCCACATTGGGACTGAGACACGGCCCAAACTCCTACGGGAGGCAGCAGTAGGGAATCTTCGGCAATGGACGAAAGTCTGACCGAGCAACGCCGCGTGAGTGAAGAAGGTTTTCGGATCGTAAAACTCTGTTGGTAGAGAAG…	961	Bacillota	Bacilli	Lactobacillales	Streptococcaceae	Lactococcus	Lactococcus lactis	1736	99.07	Lactococcus lactis	Lactococcus	162&163&158
L1-19CT-B	MT777211	Q14	Control/Healthy Silks	L	P9855HR	T	27F	0	0	TACTTGTACCAACTGGATGAGCAGCGAACGGGTGAGTAACGCGTGGGGAATCTGCCTTTGAGCGGGGGACAACATTTGGAAACGAATGCTAATACCGCATAAAAACTTTAAACACAAGTTTTAAGTTTGAAAGATGCAATTGCATCACTCAAAGATGATCCCGCGTTGTATTAGCTAGTTGGTGAGGTAAAGGCTCACCAAGGCGATGATACATAGCCGACCTGAGAGGGTGATCGGCCACATTGGGACTGAGACACGGCCCAAACTCCTACGGGAGGCAGCAGTAGGGAATCTTCGGCAATGGACGAAAGTCTGACCGAGCAACGCCGCGTGAGTGAAGAAGGTTTTCGGATCGTAAAACTCTGTTGGTAGAGAAGAACGTTGGTGAGAGTGGAAAGC…	1392	Bacillota	Bacilli	Lactobacillales	Streptococcaceae	Lactococcus	Lactococcus lactis	2555	99.86	Lactococcus lactis	Lactococcus	162
L1-17CT-D	MT777213	Q17	Control/Healthy Silks	L	P35837	T	27F	3	0.00212314	TTGAGCGCTGAAGGNTGNTACTTGTACCAACTGGATGAGCAGCGAACGGGTGAGTAACGCGTGGGGAATCTGCCTTTGAGCGGGGGACAACATTTGGAAACGAATGCTAATACCGCATAAAAACTTTAAACACAAGTTTTAAGTTTGAAAGATGCAATTGCATCACTCAAAGATGATCCCGCGTTGTATTAGCTAGTTGGTGAGGTAAAGGCTCACCAAGGCGATGATACATAGCCGACCTGAGAGGGTGATCGGCCACATTGGGACTGAGACACGGCCCAAACTCCTACGGGAGGCAGCAGTAGGGAATCTTCGGCAATGGACGAAAGTCTGACCGAGCAACGCCGCGTGAGTGAAGAAGGTTTTCGGATCGTAAAACTCTGTTGGTAGAGAAGAACG…	1413	Bacillota	Bacilli	Lactobacillales	Streptococcaceae	Lactococcus	Lactococcus lactis	2586	99.65	Lactococcus lactis	Lactococcus	158
L1-19CT-O	OM164412	Q49	Control/Healthy Silks	L	P9855HR	T	27F	2	0.00142045	GTTGAGCGCTGAAGGNTGGTACTTGTACCAACTGGATGAGCAGCGAACGGGTGAGTAACGCGTGGGGAATCTGCCTTTGAGCGGGGGACAACATTTGGAAACGAATGCTAATACCGCATAAAAACTTTAAACACAAGTTTTAAGTTTGAAAGATGCAATTGCATCACTCAAAGATGATCCCGCGTTGTATTAGCTAGTTGGTGAGGTAAAGGCTCACCAAGGCGATGATACATAGCCGACCTGAGAGGGTGATCGGCCACATTGGGACTGAGACACGGCCCAAACTCCTACGGGAGGCAGCAGTAGGGAATCTTCGGCAATGGACGAAAGTCTGACCGAGCAACGCCGCGTGAGTGAAGAAGGTTTTCGGATCGTAAAACTCTGTTGGTAGAGAAGAAC…	1408	Bacillota	Bacilli	Lactobacillales	Streptococcaceae	Lactococcus	Lactococcus lactis	2528	99.79	Lactococcus lactis	Lactococcus	158
P1-19CT-G	MT777217	R04	Control/Healthy Silks	P	P9855HR	T	27F	3	0.00220751	TTGTACCAACTGGATGAGCAGCGAACGGGTGAGTAACGCGTGGGGAATCTGCCTTTGAGCGGGGGACAACATTTGGAAACGAATGCTAATACCGCATAAAAACTTTAAACACAAGTTTTAAGTTTGAAAGATGCAATTGCATCACTCAAAGATGATCCCGCGTTGTATTAGCTAGTTGGTGAGGTAAAGGCTCACCAAGGCGATGATACATAGCCGACCTGAGAGGGTGATCGGCCACATTGGGACTGAGACACGGCCCAAACTCCTACGGGAGGCAGCAGTAGGGAATCTTCGGCAATGGACGAAAGTCTGACCGAGCAACGCCGCGTGAGTGAAGAAGGTTTTCGGATCGTAAAACTCTGTTGGTAGAGAAGAACGTTGGTGAGAGTGGAAAGCTCA…	1359	Bacillota	Bacilli	Lactobacillales	Streptococcaceae	Lactococcus	Lactococcus lactis	2494	99.71	Lactococcus lactis	Lactococcus	158&159
L1-17CT-G	MT777220	R14	Control/Healthy Silks	L	P35837	T	27F	2	0.00141343	ATACATGCAAGTTGAGCGCTGAAGGTTGGTACTTGTACCAACTGGATGAGCAGCGAACGGGTGAGTAACGCGTGGGGAATCTGCCTTTGAGCGGGGGACAACATTTGGAAACGAATGCTAATACCGCATAAAAACTTTAAACACAAGTTTTAAGTTTGAAAGATGCAATTGCATCACTCAAAGATGATCCCGCGTTGTATTAGCTAGTTGGTGAGGTAAAGGCTCACCAAGGCGATGATACATAGCCGACCTGAGAGGGTGATCGGCCACATTGGGACTGAGACACGGCCCAAACTCCTACGGGAGGCAGCAGTAGGGAATCTTCGGCAATGGACGAAAGTCTGACCGAGCAACGCCGCGTGAGTGAAGAAGGTTTTCGGATCGTAAAACTCTGTTGGT…	1415	Bacillota	Bacilli	Lactobacillales	Streptococcaceae	Lactococcus	Lactococcus lactis	2597	99.79	Lactococcus lactis	Lactococcus	158
P1-19CT-B	OM164429	R28	Control/Healthy Silks	P	P9855HR	T	27F	0	0	GTTGAGCGCTGAAGGTTGGTACTTGTACCAACTGGATGAGCAGCGAACGGGTGAGTAACGCGTGGGGAATCTGCCTTTGAGCGGGGGACAACATTTGGAAACGAATGCTAATACCGCATAAAAACTTTAAACACAAGTTTTAAGTTTGAAAGATGCAATTGCATCACTCAAAGATGATCCCGCGTTGTATTAGCTAGTTGGTGAGGTAAAGGCTCACCAAGGCGATGATACATAGCCGACCTGAGAGGGTGATCGGCCACATTGGGACTGAGACACGGCCCAAACTCCTACGGGAGGCAGCAGTAGGGAATCTTCGGCAATGGACGAAAGTCTGACCGAGCAACGCCGCGTGAGTGAAGAAGGTTTTCGGATCGTAAAACTCTGTTGGTAGAGAAGAAC…	1413	Bacillota	Bacilli	Lactobacillales	Streptococcaceae	Lactococcus	Lactococcus lactis	2599	99.86	Lactococcus lactis	Lactococcus	158
P1-19CT-E	MT777221	R37	Control/Healthy Silks	P	P9855HR	T	27F	1	0.000712758	TTGAGCGCTGAAGGNTGGTACTTGTACCAACTGGATGAGCAGCGAACGGGTGAGTAACGCGTGGGGAATCTGCCTTTGAGCGGGGGACAACATTTGGAAACGAATGCTAATACCGCATAAAAACTTTAAACACAAGTTTTAAGTTTGAAAGATGCAATTGCATCACTCAAAGATGATCCCGCGTTGTATTAGCTAGTTGGTGAGGTAAAGGCTCACCAAGGCGATGATACATAGCCGACCTGAGAGGGTGATCGGCCACATTGGGACTGAGACACGGCCCAAACTCCTACGGGAGGCAGCAGTAGGGAATCTTCGGCAATGGACGAAAGTCTGACCGAGCAACGCCGCGTGAGTGAAGAAGGTTTTCGGATCGTAAAACTCTGTTGGTAGAGAAGAACG…	1403	Bacillota	Bacilli	Lactobacillales	Streptococcaceae	Lactococcus	Lactococcus lactis	2582	99.86	Lactococcus lactis	Lactococcus	158
L1-2CB-K	MT777228	T26	Control/Healthy Silks	L	CO441	B	27F	1	0.00070922	GCAGTTGAGCGCTGAAGGTTGGTACTTGTACCAACTGGATGAGCAGCGAACGGGTGAGTAACGCGTGGGGAATCTGCCTTTGAGCGGGGGACAACATTTGGAAACGAATGCTAATACCGCATAAAAACTTTAAACACAAGTTTTAAGTTTGAAAGATGCAATTGCATCACTCAAAGATGATCCCGCGTTGTATTAGCTAGTTGGTGAGGTAAAGGCTCACCAAGGCGATGATACATAGCCGACCTGAGAGGGTGATCGGCCACATTGGGACTGAGACACGGCCCAAACTCCTACGGGAGGCAGCAGTAGGGAATCTTCGGCAATGGACGAAAGTCTGACCGAGCAACGCCGCGTGAGTGAAGAAGGTTTTCGGATCGTAAAACTCTGTTGGTAGAGAAG…	1410	Bacillota	Bacilli	Lactobacillales	Streptococcaceae	Lactococcus	Lactococcus lactis	2588	99.86	Lactococcus lactis	Lactococcus	158
P1-5CT-J	OM164513	U07 AKA V70	Control/Healthy Silks	P	CO431	T	27F	0	0	TGCAGTTGAGCGCTGAGGTTGGTACTTGTACCGACTGGATGAGCAGCGAACGGGTGAGTAACGCGTGGGGAATCTGCCTTTGAGCGGGGGACAACATTTGGAAACGAATGCTAATACCGCATAAAAACTTTAAACACAAGTTTTAAGTTTGAAAGATGCAATTGCATCACTCAAAGATGATCCCGCGTTGTATTAGCTAGTTGGTGAGGTAAAGGCTCACCAAGGCGATGATACATAGCCGACCTGAGAGGGTGATCGGCCACATTGGGACTGAGACACGGCCCAAACTCCTACGGGAGGCAGCAGTAGGGAATCTTCGGCAATGGACGAAAGTCTGACCGAGCAACGCCGCGTGAGTGAAGAAGGTTTTCGGATCGTAAAACTCTGTTGGTAGAGAAG…	1412	Bacillota	Bacilli	Lactobacillales	Streptococcaceae	Lactococcus	Lactococcus lactis	2534	99.93	Lactococcus lactis	Lactococcus	159
P1-2CT-L	MT777239	U15 AKA V69	Control/Healthy Silks	P	CO441	T	27F	0	0	AGTTGAGCGCTGAGGTTGGTACTTGTACCAACTGGATGAGCAGCGAACGGGTGAGTAACGCGTGGGGAATCTGCCTTTGAGCGGGGGACAACATTTGGAAACGAATGCTAATACCGCATAAAAACTTTAAACACAAGTTTTAAGTTTGAAAGATGCAATTGCATCACTCAAAGATGATCCCGCGTTGTATTAGCTAGTTGGTGAGGTAAAGGCTCACCAAGGCGATGATACATAGCCGACCTGAGAGGGTGATCGGCCACATTGGGACTGAGACACGGCCCAAACTCCTACGGGAGGCAGCAGTAGGGAATCTTCGGCAATGGACGAAAGTCTGACCGAGCAACGCCGCGTGAGTGAAGAAGGTTTTCGGATCGTAAAACTCTGTTGGTAGAGAAGAAC…	1411	Bacillota	Bacilli	Lactobacillales	Streptococcaceae	Lactococcus	Lactococcus lactis	2529	98.86	Lactococcus lactis	Lactococcus	158
P1-2CT-M	MT777238	U16 AKA V64	Control/Healthy Silks	P	CO441	T	27F	3	0.00212314	TGCAGTTGAGCGCTGAGGTTGGTACTTGTACCAACTGGATGAGCAGCGAACGGGTGAGTAACGCGTGGGGAATCTGCCTTTGAGCGGGGGACAACATTTGGAAACGAATGCTAATACCGCATAAAAACTTTAAACACAAGTTTTAAGTTTGAAAGATGCAATTGCATCACTCAAAGATGATCCCGCGTTGTATTAGCTAGTTGGTGAGGTAAAGGCTCACCAAGGCGATGATACATAGCCGACCTGAGAGGGTGATCGGCCACATTGGGACTGAGACACGGCCCAAACTCCTACGGGAGGCAGCAGTAGGGAATCTTCGGCAATGGACGAAAGTCTGACCGAGCAACGCCGCGTGAGTGAAGAAGGTTTTCGGATCGTAAAACTCTGTTGGTAGAGAAG…	1413	Bacillota	Bacilli	Lactobacillales	Streptococcaceae	Lactococcus	Lactococcus lactis	2513	99.65	Lactococcus lactis	Lactococcus	158
L1-2CT-A	OM164537	U71	Control/Healthy Silks	L	CO441	T	27F	0	0	TGCAGTTGAGCGCTGAAGGTTGGTACTTGTACCAACTGGATGAGCAGCGAACGGGTGAGTAACGCGTGGGGAATCTGCCTTTGAGCGGGGGACAACATTTGGAAACGAATGCTAATACCGCATAAAAACTTTAAACACAAGTTTTAAGTTTGAAAGATGCAATTGCATCACTCAAAGATGATCCCGCGTTGTATTAGCTAGTTGGTGAGGTAAAGGCTCACCAAGGCGATGATACATAGCCGACCTGAGAGGGTGATCGGCCACATTGGGACTGAGACACGGCCCAAACTCCTACGGGAGGCAGCAGTAGGGAATCTTCGGCAATGGACGAAAGTCTGACCGAGCAACGCCGCGTGAGTGAAGAAGGTTTTCGGATCGTAAAACTCTGTTGGTAGAGAA…	1412	Bacillota	Bacilli	Lactobacillales	Streptococcaceae	Lactococcus	Lactococcus lactis	2537	99.93	Lactococcus lactis	Lactococcus	158
L1-2CT-D	MT777234	U74	Control/Healthy Silks	L	CO441	T	27F	0	0	TGCAGTTGAGCGCTGAGGTTGGTACTTGTACCAACTGGATGAGCAGCGAACGGGTGAGTAACGCGTGGGGAATCTGCCTTTGAGCGGGGGACAACATTTGGAAACGAATGCTAATACCGCATAAAAACTTTAAACACAAGTTTTAAGTTTGAAAGATGCAATTGCATCACTCAAAGATGATCCCGCGTTGTATTAGCTAGTTGGTGAGGTAAAGGCTCACCAAGGCGATGATACATAGCCGACCTGAGAGGGTGATCGGCCACATTGGGACTGAGACACGGCCCAAACTCCTACGGGAGGCAGCAGTAGGGAATCTTCGGCAATGGACGAAAGTCTGACCGAGCAACGCCGCGTGAGTGAAGAAGGTTTTCGGATCGTAAAACTCTGTTGGTAGAGAAG…	1410	Bacillota	Bacilli	Lactobacillales	Streptococcaceae	Lactococcus	Lactococcus lactis	2590	99.79	Lactococcus lactis	Lactococcus	158
P1-2CT-F	MT777190	V50	Control/Healthy Silks	P	CO441	T	27F	3	0.00212164	TGCAGTTGAGCGCTGANGTTGGTACTTGTACCAACTGGATGAGCAGCGAACGGGTGAGTAACGCGTGGGGAATCTGCCTTTGAGCGGGGGACAACATTTGGAAACGAATGCTAATACCGCATAAAAACTTTAAACACAAGTTTTAAGTTTGAAAGATGCAATTGCATCACTCAAAGATGATCCCGCGTTGTATTAGCTAGTTGGTGAGGTAAAGGCTCACCAAGGCGATGATACATAGCCGACCTGAGAGGGTGATCGGCCACATTGGGACTGAGACACGGCCCAAACTCCTACGGGAGGCAGCAGTAGGGAATCTTCGGCAATGGACGAAAGTCTGACCGAGCAACGCCGCGTGAGTGAAGAAGGTTTTCGGATCGTAAAACTCTGTTGGTAGAGAAG…	1414	Bacillota	Bacilli	Lactobacillales	Streptococcaceae	Lactococcus	Lactococcus lactis	2513	99.65	Lactococcus lactis	Lactococcus	158
P1-5CT-M	OM241082	V55	Control/Healthy Silks	P	CO431	T	27F	29	0.0305585	GTGCTGATCCGCGATTACTAGCGATTCCGACTTCNTGTAGGCGAGTTGCAGCCTACAATCCGAACTGAGAATGGTTTTAAGAGATTAGCTAAACATCACTGTCTCGCGACTCGTTGTACCATCCATTGTAGCACGTGTGTAGCCCAGGTCATAAGGGGCATGATGATTTGACGTCATCCCCACCTTCCTCCGGTTTATCACCGGCAGTCTCGTTAGAGTGCCCAACTTAATGATGGCAACTAACAATAGGGNNNNNGCTCGTTGCGGGACTTAACCCAACATCTCACGACACGAGCTGACGACAACCATGCACCACCTGTATCCCGTGTCCCGAAGGAACTTCCTATCTCTAGGAATAGCACGAGTATGTCAAGACCTGGTAAGGTTCTTCGCGTTGCT…	949	Bacillota	Bacilli	Lactobacillales	Streptococcaceae	Lactococcus	Lactococcus lactis	1586	96.64	Lactococcus lactis	Lactococcus	158&159&160&164
P1-5CT-G	OM240995	V56	Control/Healthy Silks	P	CO431	T	27F	22	0.0215686	TGCAAGTTGAGCGCTGAGGTTGGTACTTGTACCGACTGGATGAGCAGCGAACGGGTGAGTAACGCGTGGGGAATCTGCCTTTGAGCGGGGGACAACATTTGGAAACGAATGCTAATACCGCATAAAAACTTTAAACACAAGTTTTAAGTTTGAAAGATGCAATTGCATCACTCAAAGATGATCCCGCGTTGTATTAGCTAGTTGGTGAGGTAAAGGCTCACCAAGGCGATGATACATAGCCGACCTGAGAGGGTGATCGGCCACATTGGGACTGAGACACGGCCCAAACTCCTACGGGAGGCAGCAGTAGGGAATCTTCGGCAATGGACGAAAGTCTGACCGAGCAACGCCGCGTGAGTGAAGAAGGTTTTCGGATCGTAAAACTCTGTTGGTAGAGAA…	1020	Bacillota	Bacilli	Lactobacillales	Streptococcaceae	Lactococcus	Lactococcus lactis	1748	97.65	Lactococcus lactis	Lactococcus	159
P1-3ET-D	MT777191	L31	Experimental/Fg-treated Silks	P	CO433	T	27F	1	0.000707714	AGTTGAGCGCTGAAGGNTGGTACTTGTACCAACTGGATGAGCAGCGAACGGGTGAGTAACGCGTGGGGAATCTGCCTTTGAGCGGGGGACAACATTTGGAAACGAATGCTAATACCGCATAAAAACTTTAAACACAAGTTTTAAGTTTGAAAGATGCAATTGCATCACTCAAAGATGATCCCGCGTTGTATTAGCTAGTTGGTGAGGTAAAGGCTCACCAAGGCGATGATACATAGCCGACCTGAGAGGGTGATCGGCCACATTGGGACTGAGACACGGCCCAAACTCCTACGGGAGGCAGCAGTAGGGAATCTTCGGCAATGGACGAAAGTCTGACCGAGCAACGCCGCGTGAGTGAAGAAGGTTTTCGGATCGTAAAACTCTGTTGGTAGAGAAGAA…	1413	Bacillota	Bacilli	Lactobacillales	Streptococcaceae	Lactococcus	Lactococcus lactis	2535	99.79	Lactococcus lactis	Lactococcus	158
L1-1EB-C	MT777206	P26	Experimental/Fg-treated Silks	L	CO449	B	27F	1	0.000704225	ATACATGCAAGTTGAGCGCTGAAGGNTGGTACTTGTACCAACTGGATGAGCAGCGAACGGGTGAGTAACGCGTGGGGAATCTGCCTTTGAGCGGGGGACAACATTTGGAAACGAATGCTAATACCGCATAAAAACTTTAAACACAAGTTTTAAGTTTGAAAGATGCAATTGCATCACTCAAAGATGATCCCGCGTTGTATTAGCTAGTTGGTGAGGTAAAGGCTCACCAAGGCGATGATACATAGCCGACCTGAGAGGGTGATCGGCCACATTGGGACTGAGACACGGCCCAAACTCCTACGGGAGGCAGCAGTAGGGAATCTTCGGCAATGGACGAAAGTCTGACCGAGCAACGCCGCGTGAGTGAAGAAGGTTTTCGGATCGTAAAACTCTGTTGGT…	1420	Bacillota	Bacilli	Lactobacillales	Streptococcaceae	Lactococcus	Lactococcus lactis	2614	99.86	Lactococcus lactis	Lactococcus	158
L1-4ET-F	MT777212	Q15	Experimental/Fg-treated Silks	L	CO432	T	27F	1	0.000724638	TTGTACCAACTGGATGAGCAGCGAACGGGTGAGTAACGCGTGGGGAATCTGCCTTTGAGCGGGGGACAACATTTGGAAACGAATGCTAATACCGCATAAAAACTTTAAACACAAGTTTTAAGTTTGAAAGATGCAATTGCATCACTCAAAGATGATCCCGCGTTGTATTAGCTAGTTGGTGAGGTAAAGGCTCACCAAGGCGATGATACATAGCCGACCTGAGAGGGTGATCGGCCACATTGGGACTGAGACACGGCCCAAACTCCTACGGGAGGCAGCAGTAGGGAATCTTCGGCAATGGACGAAAGTCTGACCGAGCAACGCCGCGTGAGTGAAGAAGGTTTTCGGATCGTAAAACTCTGTTGGTAGAGAAGAACGTTGGTGAGAGTGGAAAGCTCA…	1380	Bacillota	Bacilli	Lactobacillales	Streptococcaceae	Lactococcus	Lactococcus lactis	2536	99.86	Lactococcus lactis	Lactococcus	158&159
L1-19ET-H	OM241006	S40	Experimental/Fg-treated Silks	L	P9855HR	T	27F	6	0.00724638	TACTTGTACCAACTGGATGAGCAGCGAACGGGTGAGTAACGCGTGGGGAATCTGCCTTTGAGCGGGGGACAACATTTGGAAACGAATGCTAATACCACATAAAAACTTTAAACACAAGTTTTAAGTTTGAAAGATGCAATTGCATCACTCAAAGATGATCCCGCGTTGTATTAGCTAGTTGGTGAGGTAAAGGCTCACCAAGGCGATGATACATAGCCGACCTGAGAGGGTGATCGGCCACATTGGGACTGAGACACGGCCCAAACTCCTACGGGAGGCAGCAGTAGGGAATCTTCGGCAATGGACGAAAGTCTGACCGAGCAACGCCGCGTGAGTGAAGAAGGTTTTCGGATCGTAAAACTCTGTTGGTAGAGAAGAACGTTGGTGAGAGTGGAAAGC…	828	Bacillota	Bacilli	Lactobacillales	Streptococcaceae	Lactococcus	Lactococcus lactis	1482	99.02	Lactococcus lactis	Lactococcus	160
L1-1ET-P	MT777232	U67	Experimental/Fg-treated Silks	L	CO449	T	27F	2	0.00141543	TGCAGTTGAGCGCTGAGGNTGGTACTTGTACCAACTGGATGAGCAGCGAACGGGTGAGTAACGCGTGGGGAATCTGCCTTTGAGCGGGGGACAACATTTGGAAACGAATGCTAATACCGCATAAAAACTTTAAACACAAGTTTTAAGTTTGAAAGATGCAATTGCATCACTCAAAGATGATCCCGCGTTGTATTAGCTAGTTGGTGAGGTAAAGGCTCACCAAGGCGATGATACATAGCCGACCTGAGAGGGTGATCGGCCACATTGGGACTGAGACACGGCCCAAACTCCTACGGGAGGCAGCAGTAGGGAATCTTCGGCAATGGACGAAAGTCTGACCGAGCAACGCCGCGTGAGTGAAGAAGGTTTTCGGATCGTAAAACTCTGTTGGTAGAGAAN…	1413	Bacillota	Bacilli	Lactobacillales	Streptococcaceae	Lactococcus	Lactococcus lactis	2519	99.72	Lactococcus lactis	Lactococcus	158
P1-19ET-L	MT777236	V41	Experimental/Fg-treated Silks	P	P9855HR	T	27F	2	0.00141743	TGCAGTTGAGCGCTGAGGNTGGTACTTGTACCAACTGGATGAGCAGCGAACGGGTGAGTAACGCGTGGGGAATCTGCCTTTGAGCGGGGGACAACATTTGGAAACGAATGCTAATACCGCATAAAAACTTTAAACACAAGTTTTAAGTTTGAAAGATGCAATTGCATCACTCAAAGATGATCCCGCGTTGTATTAGCTAGTTGGTGAGGTAAAGGCTCACCAAGGCGATGATACATAGCCGACCTGAGAGGGTGATCGGCCACATTGGGACTGAGACACGGCCCAAACTCCTACGGGAGGCAGCAGTAGGGAATCTTCGGCAATGGACGAAAGTCTGACCGAGCAACGCCGCGTGAGTGAAGAAGGTTTTCGGATCGTAAAACTCTGTTGGTAGAGAAG…	1411	Bacillota	Bacilli	Lactobacillales	Streptococcaceae	Lactococcus	Lactococcus lactis	2509	99.65	Lactococcus lactis	Lactococcus	163
P1-1ET-S	MT777188	V48	Experimental/Fg-treated Silks	P	CO449	T	27F	31	0.0301263	TGCAGTTGAGCGCTGAGGNTGGTACTTGTACCAACTGGATGAGCAGCGAACGGGTGAGTAACGCGTGGGGAATCTGCCTTTGAGCGGGGGACAACATTTGGAAACGAATGCTAATACCGCATAAAAACTTTAAACACAAGTTTTAAGTTTGAAAGATGCAATTGCATCACTCAAAGATGATCCCGCGTTGTATTAGCTAGTTGGTGAGGTAAAGGCTCACCAAGGCGATGATACATAGCCGACCTGAGAGGGTGATCGGCCACATTGGGACTGAGACACGGCCCAAACTCCTACGGGAGGCAGCAGTAGGGAATCTTCGGCAATGGACGAAAGTCTGACCGAGCAACGCCGCGTGAGTGAAGAAGGTTTTCGGATCGTAAAACTCTGTTGGTAGAGAAG…	1029	Bacillota	Bacilli	Lactobacillales	Streptococcaceae	Lactococcus	Lactococcus lactis	1696	96.5	Lactococcus lactis	Lactococcus	158
L1-12CT-N	OM164288	N14	Control/Healthy Silks	L	CO448	T	27F	0	0	GGAACTCTTCGGAGGGAAGGCAGTGGAATGAGCGGCGGACGGGTGAGTAACACGTAAGGAACCTGCCTCAAGGATTGGGATAACTCCGAGAAATCGGAGCTAATACCGGATAGTTCAACGGACCGCATGGTCCGCTGATGAAAGGCGCTTCGGCGTCACCTTGAGATGGCCTTGCGGTGCATTAGCTAGTTGGTGGGGTAACGGCCCACCAAGGCGACGATGCATAGCCGACCTGAGAGGGTGATCGGCCACACTGGGACTGAGACACGGCCCAGACTCCTACGGGAGGCAGCAGTAGGGAATCTTCCACAATGGACGAAAGTCTGATGGAGCAACGCCGCGTGAGTGATGAAGGTTTTCGGATCGTAAAACTCTGTTGTAAGGGAAGAACACGTACGA…	1376	Bacillota	Bacilli	Bacillales	Bacillaceae	Exiguobacterium	Exiguobacterium acetylicum	2469	99.78	Exiguobacterium acetylicum	Exiguobacterium	104
L1-18CT-G	OM164398	Q18	Control/Healthy Silks	L	P38157	T	27F	2	0.00140154	GCAAGTCGAGCGCAGGAAGCTGACGGAACTCTTCGGAGGGAAGGCAGTGGAATGAGCGGCGGACGGGTGAGTAACACGTAAGGAACCTGCCTCAAGGATTGGGATAACTCCGAGAAATCGGAGCTAATACCGGATAGTTCANTGGACCGCATGGTCCGNTGATGAAAGGCGCTTCGGCGTCACCTTGAGATGGCCTTGCGGTGCATTAGCTAGTTGGTGGGGTAACGGCCCACCAAGGCGACGATGCATAGCCGACCTGAGAGGGTGATCGGCCACACTGGGACTGAGACACGGCCCAGACTCCTACGGGAGGCAGCAGTAGGGAATCTTCCACAATGGACGAAAGTCTGATGGAGCAACGCCGCGTGAGTGATGAAGGTTTTCGGATCGTAAAACTCT…	1427	Bacillota	Bacilli	Bacillales	Bacillaceae	Exiguobacterium	Exiguobacterium acetylicum	2606	99.58	Exiguobacterium acetylicum	Exiguobacterium	103
L1-2CT-M	OM164523	U38	Control/Healthy Silks	L	CO441	T	27F	6	0.00418702	TGCAGTCGAGCGCAGGAAGCTGACGGAACTCTTCGGAGGGAAGGCAGTGGAATGAGCGGCGGACGGGTGAGTAACACGTAAGGAACCTGCCTCAAGGATTGGGATAACTCCGAGAAATCGGAGCTAATACCGGATAGTTCNNNGGACCGCATGGTCCGGTGATGAAAGGCGCTTCGGCGTCACCTTGAGATGGCCTTGCGGTGCATTAGCTAGTTGGTGGGGTAACGGCCCACCAAGGCGACGATGCATAGCCGACCTGAGAGGGTGATCGGCCACACTGGGACTGAGACACGGCCCAGACTCCTACGGGAGGCAGCAGTAGGGAATCTTCCACAATGGACGAAAGTCTGATGGAGCAACGCCGCGTGAGTGATGAAGGTTTTCGGATCGTAAAACTCT…	1433	Bacillota	Bacilli	Bacillales	Bacillaceae	Exiguobacterium	Exiguobacterium acetylicum	2518	99.23	Exiguobacterium acetylicum	Exiguobacterium	106
L1-13CB-M1X	OM241034	B16	Control/Healthy Silks	L	CO444	B	27F	15	0.0148221	GGTCGCCTGCCTCCTTGCGGTCAGCGCAGCGCCTTCGGGTAGAACCAACTCCCATGGTGTGACGGGCGGTGTGTACAAGGCCCGGGAACGTATTCACCGCGGCATGCTGATCCGCGATTACTAGCGATTCCAACTTCATGCCCTCGAGTTGCAGAGGACAATCCGAACTGAGACGACTTTTAAGGATTAACCCTCTGTAGTCGCCATTGTAGCACGTGTGTAGCCCACCCTGTAAGGGCCATGAGGACTTGACGTCATCCCCACCTTCCTCCGGCTTAGCACCGGCAGTCCCATTAGAGTTCCCAACTAAATGATGGCAACTAATGGCGAGGGTTGCGCTCGTTGCGGGACTTAACCCAACATCTCACGACACGAGCTGACGACAGCCATGCAGCACCT…	1012	Pseudomonadota	Alphaproteobacteria	Caulobacterales	Caulobacteraceae	Brevundimonas	0	1765	98.42	Brevundimonas vesicularis	Brevundimonas	39
L1-4ET-D	OM164434	R46	Experimental/Fg-treated Silks	L	CO432	T	27F	0	0	CATGCAGTCGAACGAACTCTTCGGAGTTAGTGGCGGACGGGTGAGTAACACGTGGGAACGTGCCTTTAGGTTCGGAATAACTCAGGGAAACTTGTGCTAATACCGAATGTGCCCTTCGGGGGAAAGATTTATCGCCTTTAGAGCGGCCCGCGTCTGATTAGCTAGTTGGTGAGGTAAAGGCTCACCAAGGCGACGATCAGTAGCTGGTCTGAGAGGATGATCAGCCACATTGGGACTGAGACACGGCCCAAACTCCTACGGGAGGCAGCAGTGGGGAATCTTGCGCAATGGGCGAAAGCCTGACGCAGCCATGCCGCGTGAATGATGAAGGTCTTAGGATTGTAAAATTCTTTCACCGGGGACGATAATGACGGTACCCGGAGAAGAAGCCCCGGCTAA…	1320	Pseudomonadota	Alphaproteobacteria	Caulobacterales	Caulobacteraceae	Brevundimonas	0	2433	99.92	Brevundimonas vesicularis/ Brevundimonas nasdae	Brevundimonas	39
L1-17CB-Y	OM164125	B02	Control/Healthy Silks	L	P35837	B	27F	0	0	TGCAGTCGAACGCATCGCAAGATGAGTGGCAGACGGGTGAGTAACGCGTGGGAACATACCCTTTTCTACGGAATAGCTCTGGGAAACTGGAATTAATACCGTATACGCCCTACGGGGGAAAGATTTATCGGGGAAGGATTGGCCCGCGTTGGATTAGCTAGTTGGTGGGGTAAAGGCCTACCAAGGCGACGATCCATAGCTGGTCTGAGAGGATGATCAGCCACATTGGGACTGAGACACGGCCCAAACTCCTACGGGAGGCAGCAGTGGGGAATATTGGACAATGGGCGCAAGCCTGATCCAGCCATGCCGCGTGAGTGATGAAGGCCTTAGGGTTGTAAAGCTCTTTCACCGATGAAGATAATGACGGTAGTCGGAGAAGAAGCCCCGGCTAACTTC…	1353	Pseudomonadota	Alphaproteobacteria	Hyphomicrobiales	Rhizobiaceae	Agrobacterium	Agrobacterium larrymoorei	2427	99.85	Agrobacterium larrymoorei	Agrobacterium	12
L1-17CT-A	OM164399	Q19	Control/Healthy Silks	L	P35837	T	27F	0	0	TGCAGTCGAACGCATCGCAAGATGAGTGGCAGACGGGTGAGTAACGCGTGGGAACATACCCTTTTCTACGGAATAGCTCTGGGAAACTGGAATTAATACCGTATACGCCCTACGGGGGAAAGATTTATCGGGGAAGGATTGGCCCGCGTTGGATTAGCTAGTTGGTGGGGTAAAGGCCTACCAAGGCGACGATCCATAGCTGGTCTGAGAGGATGATCAGCCACATTGGGACTGAGACACGGCCCAAACTCCTACGGGAGGCAGCAGTGGGGAATATTGGACAATGGGCGCAAGCCTGATCCAGCCATGCCGCGTGAGTGATGAAGGCCTTAGGGTTGTAAAGCTCTTTCACCGATGAAGATAATGACGGTAGTCGGAGAAGAAGCCCCGGCTAACTTC…	1339	Pseudomonadota	Alphaproteobacteria	Hyphomicrobiales	Rhizobiaceae	Agrobacterium	Agrobacterium larrymoorei	2402	99.85	Agrobacterium larrymoorei	Agrobacterium	12
L1-2CB-F	OM164457	S24	Control/Healthy Silks	L	CO441	B	27F	0	0	AGTCGAACGCCCCGCAAGGGGAGTGGCAGACGGGTGAGTAACGCGTGGGAACATACCCTTTTCTACGGAATAGCTCTGGGAAACTGGAATTAATACCGTATACGCCCTACGGGGGAAAGATTTATCGGGGAAGGATTGGCCCGCGTTGGATTAGCTAGTTGGTGGGGTAAAGGCCTACCAAGGCGACGATCCATAGCTGGTCTGAGAGGATGATCAGCCACATTGGGACTGAGACACGGCCCAAACTCCTACGGGAGGCAGCAGTGGGGAATATTGGACAATGGGCGCAAGCCTGATCCAGCCATGCCGCGTGAGTGATGAAGGCCTTAGGGTTGTAAAGCTCTTTCACCGATGAAGATAATGACGGTAGTCGGAGAAGAAGCCCCGGCTAACTTCGTG…	1351	Pseudomonadota	Alphaproteobacteria	Hyphomicrobiales	Rhizobiaceae	Agrobacterium	Agrobacterium larrymoorei	2470	99.63	Agrobacterium larrymoorei	Agrobacterium	14
L1-2CT-N	OM164516	U22	Control/Healthy Silks	L	CO441	T	27F	2	0.00148699	ATGCAGTCGAACGCCCCGCAAGNGGGAGTGGCAGACGGGTGAGTAACGCGTGGGAACATACCCTTTTCTACGGAATAGCTCTGGGAAACTGGAATTAATACCGTATACGCCCTACGGGGGAAAGATTTATCGGGGAAGGATTGGCCCGCGTTGGATTAGCTAGTTGGTGGGGTAAAGGCCTACCAAGGCGACGATCCATAGCTGGTCTGAGAGGATGATCAGCCACATTGGGACTGAGACACGGCCCAAACTCCTACGGGAGGCAGCAGTGGGGAATATTGGACAATGGGCGCAAGCCTGATCCAGCCATGCCGCGTGAGTGATGAAGGCCTTAGGGTTGTAAAGCTCTTTCACCGATGAAGATAATGACGGTAGTCGGAGAAGAAGCCCCGGCTAACT…	1345	Pseudomonadota	Alphaproteobacteria	Hyphomicrobiales	Rhizobiaceae	Agrobacterium	Agrobacterium larrymoorei	2363	99.18	Agrobacterium larrymoorei	Agrobacterium	391
P1-2CT-E	OM240994	V49	Control/Healthy Silks	P	CO441	T	27F	2	0.00222717	CGCCCCGCAAGGGGAGTGGCAGACGGGTGAGTAACGCGTGGGAACATACCCTTTTCTACGGAATAGCTCTGGGAAACTGGAATTAATACCGTATACGCCCTACGGGGGAAAGATTTATCGGGGAAGGATTGGCCCGCGTTGGATTAGCTAGTTGGTGGGGTAAAGGCCTACCAAGGCGACGATCCATAGCTGGTCTGAGAGGATGATCAGCCACATTGGGACTGAGACACGGCCCAAACTCCTACGGGAGGCAGCAGTGGGGAATATTGGACAATGGGCGCAAGCCTGATCCAGCCATGCCGCGTGAGTGATGAAGGCCTTAGGGTTGTAAAGCTCTTTCACCGATGAAGATAATGACGGTAGTCGGAGAAGAAGCCCCGGCTAACTTCGTGCCAGCAG…	898	Pseudomonadota	Alphaproteobacteria	Hyphomicrobiales	Rhizobiaceae	0	0	1717	98.09	Agrobacterium larrymoorei	Agrobacterium	12&14&393
L1-5EB-J	OM302487	O48	Experimental/Fg-treated Silks	L	CO431	B	27F	9	0.00717703	two shorter sequences: AGTGGCAGACGGGTGAGTAACGCGTGGGAACATACCCTTTTCTACGGAATAGCTCTGGGAAACTGGAATTAATACCGTATACGCCCTACGGGGGAAAGATTTATCGGGGAAGGATTGGCCCGCGTTGGATTAGCTAGTTGGTGGGGTAAAGGCCTACCAAGGCGACGATCCATAGCTGGTCTGAGAGGATGATCAGCCACATTGGGACTGAGACACGGCCCAAACTCCTACGGGAGGCAGCAGTGGGGAATATTGGACAATGGGCGCAAGCCTGATCCAGCCATGCCGCGTGAGTGATGAAGGCCTTAGGGTTGTAAAGCTCTTTCACCGATGAAGATAATGACGGTAGTCGGAGAAGAAGCCCCGGCTAACTTCG…	783&471	Pseudomonadota	Alphaproteobacteria	Hyphomicrobiales	Rhizobiaceae	Agrobacterium	Agrobacterium larrymoorei	1428/846	99.36/98.73	Agrobacterium larrymoorei	Agrobacterium	12
L1-1ET-I	OM164534	U62	Experimental/Fg-treated Silks	L	CO449	T	27F	1	0.000738552	TGCAGTCGAACGCATCGCAAGATGAGTGGCAGACGGGTGAGTAACGCGTGGGAACATACCCTTTTCTACGGAATAGCTCTGGGAAACTGGAATTAATACCGTATACGCCCTACGGGGGAAAGATTTATCGGGGAAGGATTGGCCCGCGTTGGATTAGCTAGTTGGTGGGGTAAAGGCCTACCAAGGCGACGATCCATAGCTGGTCTGAGAGGATGATCAGCCACATTGGGACTGAGACACGGCCCAAACTCCTACGGGAGGCAGCAGTGGGGAATATTGGACAATGGGCGCAAGCCTGATCCAGCCATGCCGCGTGAGTGATGAAGGCCTTAGGGTTGTAAAGCTCTTTCACCGATGAAGATAATGACGGTAGTCGGAGAAGAAGCCCCGGCTAACTTC…	1354	Pseudomonadota	Alphaproteobacteria	Hyphomicrobiales	Rhizobiaceae	Agrobacterium	Agrobacterium larrymoorei	2425	99.78	Agrobacterium larrymoorei	Agrobacterium	12
P1-1ET-C	OM241009	V42	Experimental/Fg-treated Silks	P	CO449	T	27F	3	0.00337458	CGCATCGCAAGATGAGTGGCAGACGGGTGAGTAACGCGTGGGAACATACCCTTTTCTACGGAATAGCTCTGGGAAACTGGAATTAATACCGTATACGCCCTACGGGGGAAAGATTTATCGGGGAAGGATTGGCCCGCGTTGGATTAGCTAGTTGGTGGGGTAAAGGCCTACCAAGGCGACGATCCATAGCTGGTCTGAGAGGATGATCAGCCACATTGGGACTGAGACACGGCCCAAACTCCTACGGGAGGCAGCAGTGGGGAATATTGGACAATGGGCGCAAGCCTGATCCAGCCATGCCGCGTGAGTGATGAAGGCCTTAGGGTTGTAAAGCTCTTTCACCGATGAAGATAATGACGGTAGTCGGAGAAGAAGCCCCGGCTAACTTCGTGCCAGCAG…	889	Pseudomonadota	Alphaproteobacteria	Hyphomicrobiales	Rhizobiaceae	0	0	1757	97.57	Agrobacterium larrymoorei	Agrobacterium	12&14&393
L1-2CB-N	OM164293	N21	Control/Healthy Silks	L	CO441	B	27F	0	0	TGCAGCCGAGCGGTATTTGTCTTTCGGGACAGAGAGAGCGGCGTACGGGTGCGGAACACGTGTGCAACCTGCCTTTATCTGGGGGATAGCCTTTCGAAAGGAAGATTAATACCCCATAATATAATGAATGGCATCATTTATTATTGAAAACTCCGGTGGATAGAGATGGGCACGCGCAAGATTAGATAGTTGGTGAGGTAACGGCTCACCAAGTCGATGATCTTTAGGGGGCCTGAGAGGGTGATCCCCCACACTGGTACTGAGACACGGACCAGACTCCTACGGGAGGCAGCAGTGAGGAATATTGGACAATGGGTTAGCGCCTGATCCAGCCATCCCGCGTGAAGGACGACGGCCCTATGGGTTGTAAACTTCTTTTGTACAGGGATAAACCTACTC…	1380	Bacteroidota	Flavobacteriia	Flavobacteriales	Weeksellaceae	Chryseobacterium	Chryseobacterium hagamense	2413	98.91	Chryseobacterium hagamense	Chryseobacterium	45
L1-2CT-C	MT777233	U73	Control/Healthy Silks	L	CO441	T	27F	1	0.000722022	TGCAGCCGAGCGGTATTTGTCTTTCGGGACAGAGAGAGCGGCGTACGGGTGCGGAACACGTGTGCAACCTGCCTTTATCTGGGGGATAGCCTTTCGAAAGGAAGATTAATACCCCATAATATAATTGATGGCATCATTGATTATTGAAAACTCCGGTGGATAGAGATGGGCACGCGCAAGATTAGATAGTTGGTGAGGTAACGGCTCACCAAGTCGATGATCTTTAGGGGGCCTGAGAGGGTGATCCCCCACACTGGTACTGAGACACGGACCAGACTCCTACGGGAGGCAGCAGTGAGGAATATTGGACAATGGGTTAGCGCCTGATCCAGCCATCCCGCGTGAAGGACGACGGCCCTATGGGTTGTAAACTTCTTTTGTACAGGGATAAACCTACTC…	1385	Bacteroidota	Flavobacteriia	Flavobacteriales	Weeksellaceae	Chryseobacterium	Chryseobacterium hagamense	2391	98.77	Chryseobacterium hagamense	Chryseobacterium	49
P1-12CT-B	MT777182	V04 AKA S04	Control/Healthy Silks	P	CO448	T	27F	18	0.0174588	AGGCAGCTCCTTTTACGGTCACCGACTTCAGGTACCCCAGACTTCCATGGCTTGACGGGCGGTGTGTACAAGGCCCGGGAACGTATTCACCGCGCCATGGCTGATGCGCGATTACTAGCGATTCCAGCTTCATAGAGTCGAGTTGCAGACTCCAATCCGAACTGAGACCGGCTTTCGAGATTCGCATCCTATCGCTAGGTAGCTGCCCTCTGTACCGGCCATTGTATTACGTGTGTGGCCCAAGGCGTAAGGGCCGTGATGATTTGACGTCATCCCCACCTTCCTCTCTACTTGCGTAGGCAGTCTTACTAGAGTCCTCAACTTAATGGTAGCAACTAGTAACAGGGGTTGCGCTCGTTGCAGGACTTAACCTAACACCTCACGGCACGAGCTGACGAC…	1031	Bacteroidota	Flavobacteriia	Flavobacteriales	Weeksellaceae	Chryseobacterium	Chryseobacterium hagamense	1729	97.28	Chryseobacterium hagamense	Chryseobacterium	50
P1-5EB-M	OM164370	P20	Experimental/Fg-treated Silks	P	CO431	B	27F	0	0	TGCAGCCGAGCGGTATTTGTCTTTCGGGACAGAGAGAGCGGCGTACGGGTGCGGAACACGTGTGCAACCTGCCTTTATCTGGGGGATAGCCTTTCGAAAGGAAGATTAATACCCCATAATATAATGAATGGCATCATTTATTATTGAAAACTCCGGTGGATAGAGATGGGCACGCGCAAGATTAGATAGTTGGTGAGGTAACGGCTCACCAAGTCGATGATCTTTAGGGGGCCTGAGAGGGTGATCCCCCACACTGGTACTGAGACACGGACCAGACTCCTACGGGAGGCAGCAGTGAGGAATATTGGACAATGGGTTAGCGCCTGATCCAGCCATCCCGCGTGAAGGACGACGGCCCTATGGGTTGTAAACTTCTTTTGTACAGGGATAAACCTACTC…	1384	Bacteroidota	Flavobacteriia	Flavobacteriales	Weeksellaceae	Chryseobacterium	Chryseobacterium hagamense	2466	98.84	Chryseobacterium hagamense	Chryseobacterium	45
L1-5ET-D	OM164396	Q09	Experimental/Fg-treated Silks	L	CO431	T	27F	0	0	TGCAGCCGAGCGGTAGGGTTTCTTCGGAGACCTGAGAGCGGCGCACGGGTGCGGAACACGTGTGCAACCTGCCTTTATCTGGGGGATAGCCTTTCGAAAGGGAGATTAATACCCCATAATATATTTATCGGCATCGATGAATATTGAAAACTCCGGTGGATAGAGATGGGCACGCGCAAGATTAGATAGTTGGTGAGGTAACGGCTCACCAAGTCTGCGATCTTTAGGGGGCCTGAGAGGGTGATCCCCCACACTGGTACTGAGACACGGACCAGACTCCTACGGGAGGCAGCAGTGAGGAATATTGGACAATGGGTGAGAGCCTGATCCAGCCATCCCGCGTGAAGGACGACGGCCCTATGGGTTGTAAACTTCTTTTGTATAGGGATAAACCTACTC…	1384	Bacteroidota	Flavobacteriia	Flavobacteriales	Weeksellaceae	Chryseobacterium	Chryseobacterium timonianum	2482	99.86	Chryseobacterium timonianum	Chryseobacterium	52
P1-5ET-H	OM164425	R11	Experimental/Fg-treated Silks	P	CO431	T	27F	4	0.00288392	CATGCAGCCGAGCGGTAGGGTTTCTTCGGAGACCTGAGAGCGGCGCACGGGTGCGGAACACGTGTGCAACCTGCCTTTATCTGGGGGATAGCCTTTCGAAAGGGAGATTAATACCCCATAATATATTTATCGGCATCGATGAATATTGAAAACTCCGGTGGATAGAGATGGGCACGCGCAAGATTAGATAGTTGGTGAGGTAACGGCTCACCAAGTCTGCGATCTTTAGGGGGCCTGAGAGGGTGATCCCCCACACTGGTACTGAGACACGGACCAGACTCCTACGGGAGGCAGCAGTGAGGAATATTGGACAATGGGTGAGAGCCTGATCCAGCCATCCCGCGTGAAGGACGACGGCCCTATGGGTTGTAAACTTCTTTTGTATAGGGATAAACCTAC…	1387	Bacteroidota	Flavobacteriia	Flavobacteriales	Weeksellaceae	Chryseobacterium	Chryseobacterium sediminis	2433	98.27	Chryseobacterium sediminis	Chryseobacterium	52
L1-19CT-I	MT355373	Q22	Control/Healthy Silks	L	P9855HR	T	27F	4	0.00293686	TGCAAGTCGAACGATACTTTCNAGCTTGCTGGAGAGGAAAGTGGCGCACGGGTGCGTAACGCGTATGCAACCTACCTTCATCAGGGGGATAGCCCGGAGAAATCCGGATTAATACCGCATAAAATCACAGGATGGCATTATCCAATGATCAAACATTTATGGGATGGAGATGGGCATGCGTGTCATTAGCTAGTTGGCGGGGTAACGGCCCACCAAGGCGACGATGACTAGGGGATCTGAGAGGATGGCCCCCCACACTGGTACTGAGACACGGACCAGACTCCTACGGGAGGCAGCAGTAAGGAATATTGGTCAATGGAGGCAACTCTGAACCAGCCATGCCGCGTGCAGGAAGACTGCCCTATGGGTTGTAAACTGCTTTTATCCGGGAATAAACCT…	1362	Bacteroidota	Sphingobacteriia	Sphingobacteriales	Sphingobacteriaceae	Pedobacter	0	2468	99.27	Pedobacter terrae/ Pedobacter suwonensis	Pedobacter	300
L1-6CB-A	OM164453	S19	Control/Healthy Silks	L	CO430	B	27F	1	0.000722543	AGTCGAACGATACTTTCCAGCTTGCTGGAGAGGAAAGTGGCGCACGGGTGCGTAACGCGTATGCAACCTACCTTCATCAGGGGGATAGCCCGGAGAAATCCGGATTAATACCGCATAAAATCACAGGATGGCATTATCCAATGATCAAACATTTATGGGATGGAGATGGGCATGCGTGTCATTAGCTAGTTGGCGGGGTAACGGCCCACCAAGGCGACGATGACTAGGGGATCTGAGAGGATGGCCCCCCACACTGGTACTGAGACACGGACCAGACTCCTACGGGAGGCAGCAGTAAGGAATATTGGTCAATGGAGGCAACTCTGAACCAGCCATGCCGCGTGCAGGAAGACTGCCCTATGGGTTGTAAACTGCTTTTATCCGGGAATAAACCTCATT…	1384	Bacteroidota	Sphingobacteriia	Sphingobacteriales	Sphingobacteriaceae	Pedobacter	0	2479	98.99	Pedobacter suwonensis	Pedobacter	297
L1-19CT-A	OM164432	R43	Control/Healthy Silks	L	P9855HR	T	27F	11	0.00795948	GCTGAGCGGTANAGATCTTTCGGGATCTTGAGAGCGGCGTACGGGTGCGGAACACGTGTGCAACCTGCCTTTATCAGGGGGATAGCCTTTCGAAAGGAAGATTAATACCCCATAATATATTANATGGCATCATTTGATATTGAAAACTCCGGTGGATANAGATGGGCACGCACAAGATTAGATAGTTGGTGAGGTAACGGCTCACCAAGTCGATGATCTTTAGGGGGCCTGAGAGGGTGATCCCCCACACTGGTACTGAGACACGGACCAGACTCCTACGGGAGGCAGCAGTGAGGAATATTGGACAATGGGTTAGCGCCTGATCCAGCCATCCCGCGTGAAGGACGACGGCCCTATGGGTTGTAAACTTCTTTTGTACAGGGATAAACCTATTTACGT…	1382	Bacteroidota	Flavobacteriia	Flavobacteriales	Weeksellaceae	Chryseobacterium	Chryseobacterium camelliae	2495	98.99	Chryseobacterium camelliae	Chryseobacterium	46
L1-11CT-B	OM241008	T11	Control/Healthy Silks	L	CO452	T	27F	25	0.0239923	CATGCAGCTGAGCGGTAGAGATCTTTCGGGANCTTGAGAGCGGCGTACGGGTGCGGAACACGTGTGCAACCTGCCTTTATCAGGGGGATAGCCTTTCGAAAGGAAGATTAATACCCCATAATATATTAAGTGGCATCATTTGATATTGAAAACTCCGGTGGATAGAGATGGGCACGCGCAAGATTAGATAGTTGGTGAGGTAACGGCTCACCAAGTCGATGATCTTTAGGGGGCCTGAGAGGGTGATCCCCCACACTGGTACTGAGACACGGACCAGACTCCTACGGGAGGCAGCAGTGAGGAATATTGGACAATGGGTTAGCGCCTGATCCAGCCATCCCGCGTGAAGGACGACGGCCCTATGGGTTGTAAACTTCTTTTGTACAGGGATAAACCTAT…	1042	Bacteroidota	Flavobacteriia	Flavobacteriales	Weeksellaceae	Chryseobacterium	0	1771	97.32	Chryseobacterium camelliae	Chryseobacterium	48
L1-2CT-H	OM164541	U78	Control/Healthy Silks	L	CO441	T	27F	2	0.00144404	ATGCAGCTGAGCGGTAGAGATCTTTCGGGATCTTGAGAGCGGCGTACGGGTGCGGAACACGTGTGCAACCTGCCTTTATCAGGGGGATAGCCTTTCGAAAGGAAGATTAATACCCCATAATATATTAAATGGCATCATTTGATATTGAAAACTCCGGTGGATAGAGATGGGCACGCGCAAGATTAGATAGTTGGTGAGGTAACGGCTCACCAAGTCGATGATCTTTAGGGGGCCTGAGAGGGTGATCCCCCACACTGGTACTGAGACACGGACCAGACTCCTACGGGAGGCAGCAGTGAGGAATATTGGACAATGGGTTAGCGCCTGATCCAGCCATCCCGCGTGAAGGACGACGGCCCTATGGGTTGTAAACTTCTTTTGTACAGGGATAAACCTATT…	1385	Bacteroidota	Flavobacteriia	Flavobacteriales	Weeksellaceae	Chryseobacterium	Chryseobacterium camelliae	2463	99.64	Chryseobacterium camelliae	Chryseobacterium	43
P1-2CT-D	OM164543	V06	Control/Healthy Silks	P	CO448	T	27F	0	0	CATGCAGCTGAGCGGTAGAGATCTTTCGGGATCTTGAGAGCGGCGTACGGGTGCGGAACACGTGTGCAACCTGCCTTTATCAGGGGGATAGCCTTTCGAAAGGAAGATTAATACCCCATAATATATTAAATGGCATCATTTGATATTGAAAACTCCGGTGGATAGAGATGGGCACGCGCAAGATTAGATAGTTGGTGAGGTAACGGCTCACCAAGTCGATGATCTTTAGGGGGCCTGAGAGGGTGATCCCCCACACTGGTACTGAGACACGGACCAGACTCCTACGGGAGGCAGCAGTGAGGAATATTGGACAATGGGTTAGCGCCTGATCCAGCCATCCCGCGTGAAGGACGACGGCCCTATGGGTTGTAAACTTCTTTTGTACAGGGATAAACCTAT…	1378	Bacteroidota	Flavobacteriia	Flavobacteriales	Weeksellaceae	Chryseobacterium	Chryseobacterium camelliae	2534	99.85	Chryseobacterium camelliae	Chryseobacterium	44
P1-4EB-F	OM164364	P09	Experimental/Fg-treated Silks	P	CO432	B	27F	0	0	TGCAAGCTGAGCGGTAGAGATCTTTCGGGATCTTGAGAGCGGCGTACGGGTGCGGAACACGTGTGCAACCTGCCTTTATCAGGGGGATAGCCTTTCGAAAGGAAGATTAATACCCCATAATATATTAAATGGCATCATTTGATATTGAAAACTCCGGTGGATAGAGATGGGCACGCGCAAGATTAGATAGTTGGTGAGGTAACGGCTCACCAAGTCGATGATCTTTAGGGGGCCTGAGAGGGTGATCCCCCACACTGGTACTGAGACACGGACCAGACTCCTACGGGAGGCAGCAGTGAGGAATATTGGACAATGGGTTAGCGCCTGATCCAGCCATCCCGCGTGAAGGACGACGGCCCTATGGGTTGTAAACTTCTTTTGTACAGGGATAAACCTATT…	1385	Bacteroidota	Flavobacteriia	Flavobacteriales	Weeksellaceae	Chryseobacterium	Chryseobacterium camelliae	2494	99.93	Chryseobacterium camelliae	Chryseobacterium	44
L1-3EB-Y	OM241039	F17	Experimental/Fg-treated Silks	L	CO433	B	27F	18	0.0179641	GGTAGCNCCCTCCCGAAGGTTAAGCTACCTACTTCTTTTGCAACCCACTCCCATGGTGTGACGGGCGGTGTGTACAAGGCCCGGGAACGTATTCACCGTAGCATTCTGATCTACGATTACTAGCGATTCCGACTTCACGGAGTCGAGTTGCAGACTCCGATCCGGACTACGACGTACTTTATGAGGTCCGCTTGCTCTCGCGAGTTCGCTTCTCTTTGTATACGCCATTGTAGCACGTGTGTAGCCCTACTCGTAAGGGCCATGATGACTTGACGTCATCCCCACCTTCCTCCGGTTTATCACCGGCAGTCTCCTTTGAGTTCCCGCCATTACGCGCTGGCAACAAAGGATAAGGGTTGCGCTCGTTGCGGGACTTAACCCAACATTTCACAACACGAG…	1002	Pseudomonadota	Gammaproteobacteria	Enterobacterales	Yersiniaceae	Serratia	0	1726	98.78	Serratia grimesii and Serratia liquefaciens	Serratia	345
L1-16ET-M	OM164531	U55	Experimental/Fg-treated Silks	L	CO462	T	27F	0	0	CTTGCTTCTCTTGAGAGCGGCGGACGGGTGAGTAATGCCTAGGAATCTGCCTGGTAGTGGGGGATAACGTTCGGAAACGAACGCTAATACCGCATACGTCCTACGGGAGAAAGCAGGGGACCTTCGGGCCTTGCGCTATCAGATGAGCCTAGGTCGGATTAGCTAGTTGGTGGGGTAATGGCTCACCAAGGCGACGATCCGTAACTGGTCTGAGAGGATGATCAGTCACACTGGAACTGAGACACGGTCCAGACTCCTACGGGAGGCAGCAGTGGGGAATATTGGACAATGGGCGAAAGCCTGATCCAGCCATGCCGCGTGTGTGAAGAAGGTCTTCGGATTGTAAAGCACTTTAAGTTGGGAGGAAGGGCCATTACCTAATACGTGATGGTTTTGACG…	1352	Pseudomonadota	Gammaproteobacteria	Pseudomonadales	Pseudomonadaceae	Pseudomonas	Pseudomonas rhodesiae	2497	100	Pseudomonas rhodesiae	Pseudomonas	320
L1-18CT-A	OM164395	Q07	Control/Healthy Silks	L	P38157	T	27F	1	0.000706215	TGCAAGTCGAACGCTTTTTCTTTCACCGGAGCTTGCTCCACCGAAAGAAAAAGAGTGGCGAACGGGTGAGTAACACGTGGGTAACCTGCCCATCAGAAGGGGATAACACTTGGAAACAGGTGCTAATACCGTATAACACTATTTTCCGCATGGAAGAAAGTTGAAAGGCGCTTTTGCGTCACTGATGGATGGACCCGCGGTGCATTAGCTAGTTGGTGAGGTAACGGCTCACCAAGGCAACGATGCATAGCCGACCTGAGAGGGTGATCGGCCACACTGGGACTGAGACACGGCCCAGACTCCTACGGGAGGCAGCAGTAGGGAATCTTCGGCAATGGACGAAAGTCTGACCGAGCAACGCCGCGTGAGTGAAGAAGGTTTTCGGATCGTAAAACTCTG…	1416	Bacillota	Bacilli	Lactobacillales	Enterococcaceae	Enterococcus	0	2603	99.86	Enterococcus gallinarum	Enterococcus	85
L1-19CT-Q	OM164413	Q52	Control/Healthy Silks	L	P9855HR	T	27F	4	0.00280702	TGCAGTCGAACGCTTTTTCTTTCACCGGAGCTTGCTCCACCGAAAGAAAAAGAGTGGCGAACGGGTGAGTAACACGTGGGTAACCTGCCCATCAGAAGGGGATAACACTTGGAAACAGGTGCTAATACCGTATAACACTATTTTCCGCATGGAAGAAAGTTGAAAGGCGCTTTTGCGTCACTGATGGATGGACCCGCGGTGCATTAGCTAGTTGGTGAGGTAACGGCTCACCAAGGCAACGATGCATAGCCGACCTGAGAGGGTGATCGGCCACACTGGGACTGAGACACGGCCCAGACTCCTACGGGAGGCAGCAGTAGGGAATCTTCGGCAATGGACGAAAGTCTGACCGAGCAACGCCGCGTGAGTGAAGAAGGTTTTCGGATCGTAAAACTCTGT…	1425	Bacillota	Bacilli	Lactobacillales	Enterococcaceae	Enterococcus	0	2542	99.58	Enterococcus gallinarum	Enterococcus	87
L1-1CT-E	OM164482	T12	Control/Healthy Silks	L	CO449	T	27F	3	0.00210526	TGCAGTCGAACGCTTTTTCTTTCNCCGGAGCTTGCTCCACCGAAAGAAAAAGAGTGGCGAACGGGTGAGTAACACGTGGGTAACCTGCCCATCAGAAGGGGATAACACTTGGAAACAGGTGCTAATACCGTATAACACTATTTTCCGCATGGAAGAAAGTTGAAAGGCGCTTTTGCGTCACTGATGGATGGACCCGCGGTGCATTAGCTAGTTGGTGAGGTAACGGCTCACCAAGGCAACGATGCATAGCCGACCTGAGAGGGTGATCGGCCACACTGGGACTGAGACACGGCCCAGACTCCTACGGGAGGCAGCAGTAGGGAATCTTCGGCAATGGACGAAAGTCTGACCGAGCAACGCCGCGTGAGTGAAGAAGGTTTTCGGATCGTAAAACTCTGT…	1425	Bacillota	Bacilli	Lactobacillales	Enterococcaceae	Enterococcus	0	2550	99.72	Enterococcus gallinarum	Enterococcus	85
L1-2CT-Q	OM164517	U24 AKA V53	Control/Healthy Silks	L	CO441	T	27F	0	0	TGCAGTCGAACGCTTTTTCTTTCACCGGAGCTTGCTCCACCGAAAGAAAAAGAGTGGCGAACGGGTGAGTAACACGTGGGTAACCTGCCCATCAGAAGGGGATAACACTTGGAAACAGGTGCTAATACCGTATAACACTATTTTCCGCATGGAAGAAAGTTGAAAGGCGCTTTTGCGTCACTGATGGATGGACCCGCGGTGCATTAGCTAGTTGGTGAGGTAACGGCTCACCAAGGCAACGATGCATAGCCGACCTGAGAGGGTGATCGGCCACACTGGGACTGAGACACGGCCCAGACTCCTACGGGAGGCAGCAGTAGGGAATCTTCGGCAATGGACGAAAGTCTGACCGAGCAACGCCGCGTGAGTGAAGAAGGTTTTCGGATCGTAAAACTCTGT…	1424	Bacillota	Bacilli	Lactobacillales	Enterococcaceae	Enterococcus	0	2553	99.86	Enterococcus gallinarum	Enterococcus	85
L1-1CT-D	OM164294	N33	Control/Healthy Silks	L	CO449	T	27F	1	0.000712251	TGCAGTCGAGCGGANGAGAGGAGCTTGCTCTTCGATTCAGCGGCGGACGGGTGAGTAATGCCTAGGAATCTGCCTAGTAGTGGGGGACAACGTTTCGAAAGGAACGCTAATACCGCATACGTCCTACGGGAGAAAGTGGGGGATCTTCGGACCTCACGCTATTAGATGAGCCTAGGTCGGATTAGCTAGTTGGTAGGGTAAAGGCCTACCAAGGCGACGATCCGTAACTGGTCTGAGAGGATGATCAGTCACACTGGAACTGAGACACGGTCCAGACTCCTACGGGAGGCAGCAGTGGGGAATATTGGACAATGGGCGAAAGCCTGATCCAGCCATGCCGCGTGTGTGAAGAAGGCCTTCGGGTCGTAAAGCACTTTAAGTTGGGAGGAAGGGCTTACA…	1404	Pseudomonadota	Gammaproteobacteria	Pseudomonadales	Pseudomonadaceae	Pseudomonas	0	2493	99.5	Pseudomonas oryzihabitans and Pseudomonas psychrotolerans	Pseudomonas	309
L1-8ET-D	OM164536	U68	Experimental/Fg-treated Silks	L	CO325	T	27F	2	0.00142653	AGTCGAGCGGANGAGAGGAGCTTGCTCCTCGATTCAGCGGCGGACGGGTGAGTAATGCCTAGGAATCTGCCTAGTAGTGGGGGACAACGTTTCGAAAGGAACGCTAATACCGCATACGTCCTACGGGAGAAAGTGGGGGATCTTCGGACCTCACGCTATTAGATGAGCCTAGGTCGGATTAGCTAGTTGGTAGGGTAAAGGCCTACCAAGGCGACGATCCGTAACTGGTCTGAGAGGATGATCAGTCACACTGGAACTGAGACACGGTCCAGACTCCTACGGGAGGCAGCAGTGGGGAATATTGGACAATGGGCGAAAGCCTGATCCAGCCATGCCGCGTGTGTGAAGAAGGCCTTCGGGTCGTAAAGCACTTTAAGTTGGGAGGAANGGGCTTACAGC…	1402	Pseudomonadota	Gammaproteobacteria	Pseudomonadales	Pseudomonadaceae	Pseudomonas	Pseudomonas psychrotolerans	2487	99.43	Pseudomonas psychrotolerans	Pseudomonas	308
L1-18CT-C	OM241004	R38	Control/Healthy Silks	L	P38157	T	27F	11	0.0108696	AGTCGAACGATGCTTTCGGGCATAGTGGCGCACGGGTGCGTAACGCGTGGGAATCTGCCCTTTGGTCTGGGATAACTGTTGGAAACGACAGCTAATACCGGATGATGACGTAAGTCCAAAGATTTATCGCCAGAGGATGAGCCCGCGTCGGATTAGCTAGTTGGTGGGGTAAAGGCCTACCAAGGCGACGATCCGTAGCTGGTCTGAGAGGATGATCAGCCACACTGGGACTGAGACACGGCCCAGACTCCTACGGGAGGCAGCAGTGGGGAATATTGGACAATGGGCGAAAGCCTGATCCAGCAATGCCGCGTGAGTGATGAAGGCCTTAGGGTTGTAAAGCTCTTTTACCCGGGATGATAATGACAGTACCGGGAGAATAAGCTCCGGCTAACTCCG…	1012	Pseudomonadota	Alphaproteobacteria	Sphingomonadales	Sphingomonadaceae	Sphingomonas	Sphingomonas roseiflava	1820	98.72	Sphingomonas roseiflava	Sphingomonas	350
P1-4CB-J	OM164343	O38	Control/Healthy Silks	P	CO432	B	27F	4	0.00282885	CATGCAGTCGAGCGGTAGCACAGAGAGCTTGCTCTCGGGTGACGAGCGGCGGACGGGTGAGTAATGTCTGGGAAACTGCCTGATGGAGGGGGATAACTACTGGAAACGGTAGCTAATACCGCATAACGTCGCAAGACCAAAGTGGGGGACCTTCGGGCCTCATGCCATCAGATGTGCCCAGATGGGATTAGCTAGTAGGTGGGGTAATGGCTCACCTAGGCGACGATCCCTAGCTGGTCTGAGAGGATGACCAGCCACACTGGAACTGAGACACGGTCCAGACTCCTACGGGAGGCAGCAGTGGGGAATATTGCACAATGGGCGCAAGCCTGATGCAGCCATGCCGCGTGTATGAAGAAGGCCTTCGGGTTGTAAAGTACTTTCAGCGAGGAGGAAGGC…	1414	Pseudomonadota	Gammaproteobacteria	Enterobacterales	Enterobacteriaceae	Raoultella	Raoultella planticola	2567	99.29	Raoultella planticola	Raoultella	329
P1-6CB-D	OM164466	S43	Control/Healthy Silks	P	CO430	B	27F	0	0	AGTAGCTTGCTACTTTGCTGACGAGTGGCGGACGGGTGAGTAATGTCTGGGGATCTGCCTGATGGAGGGGGATAACTACTGGAAACGGTAGCTAATACCGCATAATGTCGCAAGACCAAAGCGGGGGACTTTCGGGCCTCGCACCATCAGATGAACCCAGATGGGATTAGCTAGTAGGTAAGGTAATGGCTTACCTAGGCGACGATCCCTAGCTGGTCTGAGAGGATGACCAGCCACACTGGAACTGAGACACGGTCCAGACTCCTACGGGAGGCAGCAGTGGGGAATATTGCACAATGGGCGCAAGCCTGATGCAGCCATGCCGCGTGTATGAAGAAGGCCTTCGGGTTGTAAAGTACTTTCAGTCAGGAGGAAGGGTGTGAAATTAATACTTTCATG…	1359	Pseudomonadota	Gammaproteobacteria	Enterobacterales	Enterobacteriaceae	Rosenbergiella	Rosenbergiella epipactidis	2499	99.85	Rosenbergiella epipactidis	Rosenbergiella	336
L1-2CB-B	OM164440	R61	Control/Healthy Silks	L	CO441	B	27F	4	0.00284091	CATGCAGTCGAGCGGANGANGGGAGCTTGCTCCTGGATTCAGCGGCGGACGGGTGAGTAATGCCTAGGAATCTGCCTGGTAGTGGGGGACAACGTTTCGAAAGGAACGCTAATACCGCATACGTCCTACGGGAGAAAGCAGGGGACCTTCGGGCCTTGCGCTATCAGATGAGCCTAGGTCGGATTAGCTAGTTGGTGAGGTAATGGCTCACCAAGGCGACGATCCGTAACTGGTCTGAGAGGATGATCAGTCACACTGGAACTGAGACACGGTCCAGACTCCTACGGGAGGCAGCAGTGGGGAATATTGGACAATGGGCGAAAGCCTGATCCAGCCATGCCGCGTGTGTGAAGAAGGTCTTCGGATTGTAAAGCACTTTAAGTTGGGAGGAAGGGTTGT…	1408	Pseudomonadota	Gammaproteobacteria	Pseudomonadales	Pseudomonadaceae	Pseudomonas	Pseudomonas parafulva	2551	99.36	Pseudomonas parafulva	Pseudomonas	311
L1-8CT-P1-Z	OM164110	1	Control/Healthy Silks	L	CO325	T	799F	2	0.00278164	TACCNTTGTTACGACTTAGTCCTAATCACCGATCCCACNTTCGACGGCTCCTTCCACAAGGGTTAGGCCACCGGCTTCGGGTGTTACCGACTTTCATGACTTGACGGGCGGTGTGTACAAGGCCCGGGAACGTATTCACCGCAGCGTTGCTGATCTGCGATTACTAGCGACTCCGACTTCATGAGGTCGAGTTGCAGACCTCAATCCGAACTGAGACCGGCTTTTTGGGATTCGCTCCACCTTACGGTATCGCAGCCCTTTGTACCGGCCATTGTAGCATGCGTGAAGCCCAAGACATAAGGGGCATGATGATTTGACGTCATCCCCACCTTCCTCCGAGTTGACCCCGGCAGTCTCCTATGAGTCCCCGCCATAACGCGCTGGCAACATAGAACGAGG…	719	Actinomycetota	Actinomycetia	Micrococcales	Microbacteriaceae	Curtobacterium	Curtobacterium luteum	1286	99.72	Curtobacterium luteum	Curtobacterium	58&60
L1-8CT-P1-V	OM164112	4	Control/Healthy Silks	L	CO325	T	799F	3	0.00420168	TTACCNTTGTTACGACTTCACCCCAGTCNTNGGCCACACCGTGGCAAGCGCCCTCCCGAAGGTTAAGCTACCTGCTTCTGGTGCAACAAACTCCCATGGTGTGACGGGCGGTGTGTACAAGGCCCGGGAACGTATTCACCGCAGCAATGCTGATCTGCGATTACTAGCGATTCCGACTTCATGGAGTCGAGTTGCAGACTCCAATCCGGACTGAGATAGGGTTTCTGGGATTGGCTTACCGTCGCCGGCTTGCAGCCCTCTGTCCCTACCATTGTAGTACGTGTGTAGCCCTGGCCGTAAGGGCCATGATGACTTGACGTCATCCCCACCTTCCTCCGGTTTGTCACCGGCGGTCTCCTTAGAGTTCCCACCATTACGTGCTGGCAACTAAGGACAAGG…	714	Pseudomonadota	Gammaproteobacteria	Xanthomonadales	Xanthomonadaceae	Stenotrophomonas	0	1269	99.44	Stenotrophomonas pavanii/ Stenotrophomonas humi*	Stenotrophomonas	372&373&374&375
L1-13CB-G1-Z	OM164114	6	Control/Healthy Silks	L	CO444	B	799F	6	0.0083682	TTACCCTTGTTACGACTTCACCCCANTNNNNTAAGCCCACNGTGGTCGCCTGCCTCCTCTTGCGAGGTTAGCGCAACGCCTTCGGGTGAACCCAACTCCCATGGTGTGACGGGCGGTGTGTACAAGGCCTGGGAACGTATTCACCGCGGCATGCTGATCCGCGATTACTAGCGATTCCGCCTTCATGCTCTCGAGTTGCAGAGAACAATCCGAACTGAGACGACTTTTGGAGATTAGCTCACCCTCGCGGGATTGCAGCCCACTGTAGTCGCCATTGTAGCACGTGTGTAGCCCAGCGCGTAAGGGCCATGAGGACTTGACGTCATCCCCACCTTCCTCCGGCTTATCACCGGCGGTTCCTTTAGAGTACCCAACTAAATGATGGTAACTAAAGGCGAG…	717	Pseudomonadota	Alphaproteobacteria	Sphingomonadales	Sphingomonadaceae	Sphingomonas	Sphingomonas phyllosphaerae	1240	98.74	Sphingomonas phyllosphaerae	Sphingomonas	355
L1-13CB-M1-V	OM164115	8	Control/Healthy Silks	L	CO444	B	799F	1	0.00140252	TTACCTTGTTACGACTTAGTCCTANTCACCGATCCCACCTTCGACAGCTCCATCCACAAGGGTTAGGCCACTGGCTTCGGGTGTTACCGACTTTCATGACTTGACGGGCGGTGTGTACAAGGCCCGGGAACGTATTCACCGCAGCGTTGCTGATCTGCGATTACTAGCGACTCCGACTTCATGAGGTCGAGTTGCAGACCTCAATCCGAACTGAGACCGGCTTTTTGGGATTCGCTCCACCTTACGGTATCGCAGCCCTTTGTACCGGCCATTGTAGCATGCGTGAAGCCCAAGACATAAGGGGCATGATGATTTGACGTCATCCCCACCTTCCTCCGAGTTGACCCCGGCAGTCTCCTATGAGTTCCCACCATAACGTGCTGGCAACATAGAACGAGG…	713	Actinomycetota	Actinomycetia	Micrococcales	Microbacteriaceae	Frigoribacterium	Frigoribacterium faeni	1273	99.58	Frigoribacterium faeni	Frigoribacterium	109
L1-8CT-P1-W	OM262839	9	Control/Healthy Silks	L	CO325	T	799F	1	0.00142248	GTTACGACTTCACCCCNGTCATGAATCACAAAGTGGTAAGCGCCCTCCCGAAGGTTAAGCTACCTACTTCTTTTGCAACCCACTCCCATGGTGTGACGGGCGGTGTGTACAAGGCCCGGGAACGTATTCACCGTAGCATTCTGATCTACGATTACTAGCGATTCCGACTTCATGGAGTCGAGTTGCAGACTCCAATCCGGACTACGACGCACTTTATGAGGTCCGCTTGCTCTCGCGAGGTCGCTTCTCTTTGTATGCGCCATTGTAGCACGTGTGTAGCCCTACTCGTAAGGGCCATGATGACTTGACGTCATCCCCACCTTCCTCCAGTTTATCACTGGCAGTCTCCTTTGAGTTCCCGGCCGAACCGCTGGCAACAAAGGATAAGGGTTGCGCTCG…	703	Pseudomonadota	Gammaproteobacteria	Enterobacterales	Enterobacteriaceae	0	0	1256	99.57	Enterobacter tabaci/Cedecea davisae, same sequence*	Enterobacter/Cedecea*	83
L1-13CB-M1-Y	OM164116	10	Control/Healthy Silks	L	CO444	B	799F	5	0.00684932	TTACCTTNGTTANGANTTCGTCCCAATCGCCAGCCCCACNTTNGACGGCTCCCTCCCACAAGGGGTTAGGCCACCGGCTTCGGGTGTTGCCGACTTTCGTGACGTGACGGGCGGTGTGTACAAGGCCCGGGAACGTATTCACCGCAGCGTTGCTGATCTGCGATTACTAGCGACTCCGACTTCATGGGGTCGAGTTGCAGACCCCAATCCGAACTGAGACCGGCTTTTTGGGATTCGCTCCCCCTCACGGGATCGCAGCCCTTTGTACCGGCCATTGTAGCATGCGTGAAGCCCTGGACATAAGGGGCATGATGACTTGACGTCATCCCCACCTTCCTCCGAGTTGACCCCGGCAGTCTCCTATGAGTCCCCACCATCCCGAAGGACGTGCTGGCAACA…	730	Actinomycetota	Actinomycetia	Propionibacteriales	Nocardioidaceae	Nocardioides	Nocardioides salarius	1237	98.46	Nocardioides salarius	Nocardioides	194
L1-13CB-G1-X	OM164118	12	Control/Healthy Silks	L	CO444	B	799F	0	0	GGGCACATGGTGTTTCGGTGGCGCAGCTAACGCATTAAGTTATCCGCCTGGGGAGTACGGTCGCAAGATTAAAACTCAAAGGAATTGACGGGGGCCTGCACAAGCGGTGGAGCATGTGGTTTAATTCGAAGCAACGCGCAGAACCTTACCAACGTTTGACATCCCTATCGCGGATCGTGGAGACACTTTCCTTCAGTTCGGCTGGATAGGTGACAGGTGCTGCATGGCTGTCGTCAGCTCGTGTCGTGAGATGTTGGGTTAAGTCCCGCAACGAGCGCAACCCTCGCCTTTAGTTGCCATCATTTAGTTGGGTACTCTAAAGGAACCGCCGGTGATAAGCCGGAGGAAGGTGGGGATGACGTCAAGTCCTCATGGCCCTTACGCGTTGGGCTACACACG…	632	Pseudomonadota	Alphaproteobacteria	Sphingomonadales	Sphingomonadaceae	Sphingobium	Sphingobium paulinellae	1136	99.84	Sphingobium paulinellae	Sphingobium	349
L1-13CB-M1-U	OM164120	14	Control/Healthy Silks	L	CO444	B	799F	1	0.00158983	AGGTGTGGGGTCTGTTTCCACGGANTCCGCGCCGTAGCTAACGCATTAAGTGCCCCGCCTGGGGAGTACGGCCGCAAGGCTAAAACTCAAAGGAATTGACGGGGGCCCGCACAAGCGGCGGAGCATGCGGATTAATTCGATGCAACGCGAAGAACCTTACCAAGGCTTGACATACTTGAGAAGCCGCCAGAGATGGTGGTCTCTTTGGACACTCATGTACAGGTGGTGCATGGTTGTCGTCAGCTCGTGTCGTGAGATGTTGGGTTAAGTCCCGCAACGAGCGCAACCCTCGTCCTATGTTGCCAGCACGTGATGGTGGGGACTCATAGGAGACTGCCGGGGTCAACTCGGAGGAAGGTGGGGATGACGTCAAATCATCATGCCCCTTATGTCTTGGGC…	629	Actinomycetota	Actinomycetia	Micrococcales	Beutenbergiaceae	0	0	1069	97.77	Serinibacter tropicus	Serinibacter	341
L1-13CB-G1-Y	OM164121	A01 AKA J02	Control/Healthy Silks	L	CO444	B	799F	0	0	CCCACCTTAGGCGGCTGGCTCCAAAAGGTTACCTCACCGACTTCGGGTGTTACAAACTCTCGTGGTGTGACGGGCGGTGTGTACAAGGCCCGGGAACGTATTCACCGCGGCGTGCTGATCCGCGATTACTAGCGATTCCGGCTTCATGTAGGCGAGTTGCAGCCTACAATCCGAACTGAGAGAAGCTTTAAGAGATTAGCTTAGCCTCGCGACTTCGCAACTCGTTGTACTTCCCATTGTAGCACGTGTGTAGCCCAGGTCATAAGGGGCATGATGATTTGACGTCATCCCCACCTTCCTCCGGTTTGTCACCGGCAGTCTCGCTAGAGTGCCCAACTAAATGATGGCAACTAACAATAAGGGTTGCGCTCGTTGCGGGACTTAACCCAACATCTCACG…	693	Bacillota	Bacilli	Lactobacillales	Enterococcaceae	Enterococcus	0	1248	99.86	Enterococcus canintestini	Enterococcus	85&87
L1-13CB-P1/10-Z	OM164122	A02 AKA B06	Control/Healthy Silks	L	CO444	B	799F	0	0	TACCTTACGACTTCACCCCAGTCATGAATCACAAAGTGGTAAGCGCCCTCCCGAAGGTTAAGCTACCTACTTCTTTTGCAACCCACTCCCATGGTGTGACGGGCGGTGTGTACAAGGCCCGGGAACGTATTCACCGTAGCATTCTGATCTACGATTACTAGCGATTCCGACTTCATGGAGTCGAGTTGCAGACTCCAATCCGGACTACGACATACTTTATGAGGTCCGCTTGCTCTCGCGAGGTCGCTTCTCTTTGTATATGCCATTGTAGCACGTGTGTAGCCCTGGTCGTAAGGGCCATGATGACTTGACGTCATCCCCACCTTCCTCCAGTTTATCACTGGCAGTCTCCTTTGAGTTCCCGGCCGAACCGCTGGCAACAAAGGATAAGGGTTGCGC…	693	Pseudomonadota	Gammaproteobacteria	Enterobacterales	Enterobacteriaceae	0	0	1239	99.85	Klebsiella pneumoniae	Klebsiella	139
L1-13CB-M-Z	OM241079	A03	Control/Healthy Silks	L	CO444	B	799F	0	0	GGCAGCTCCTTTTACGGTCACCGACTTCAGGTACCCCAGACTTCCATGGCTTGACGGGCGGTGTGTACAAGGCCCGGGAACGTATTCACCGCGCCATGGCTGATGCGCGATTACTAGCGATTCCAGCTTCATAGAGTCGAGTTGCAGACTCCAATCCGAACTGAGACAGGCTTTCGAGATTCGCATCACATCGCTGTGTAGCTGCCCTCTGTACCTGCCATTGTATTACGTGTGTGGCCCAAGGCGTAAGGGCCGTGATGATTTGACGTCATCCCCACCTTCCTCTCTACTTGCGTAGGCAGTCTTACTAGAGTCCTCAACTTAATGGTAGCAACTAGTAACAGGGGTTGCGCTCGTTGCAGGACTTAACCTAACACCTCACGGCACGAGCTGACGACA…	671	Bacteroidota	Flavobacteriia	Flavobacteriales	Weeksellaceae	Chryseobacterium	Chryseobacterium camelliae	1211	100	Chryseobacterium camelliae	Chryseobacterium	44
L1-13CB-M-X	OM164123	A04	Control/Healthy Silks	L	CO444	B	799F	0	0	TACCTTTGTTACGACTTCACCCCAGTCGCTGACCCTACCGTGGTCGCCTGCCTCCTTGCGGTCAGCGCAGCGCCTTCGGGTAGAACCAACTCCCATGGTGTGACGGGCGGTGTGTACAAGGCCCGGGAACGTATTCACCGCGGCATGCTGATCCGCGATTACTAGCGATTCCAACTTCATGCCCTCGAGTTGCAGAGGACAATCCGAACTGAGACGACTTTTAAGGATTAACCCTCTGTAGTCGCCATTGTAGCACGTGTGTAGCCCACCCTGTAAGGGCCATGAGGACTTGACGTCATCCCCACCTTCCTCCGGCTTAGCACCGGCAGTCCCATTAGAGTTCCCAACTAAATGATGGCAACTAATGGCGAGGGTTGCGCTCGTTGCGGGACTTAACCC…	673	Pseudomonadota	Alphaproteobacteria	Caulobacterales	Caulobacteraceae	Brevundimonas	Brevundimonas vesicularis	1206	99.85	Brevundimonas vesicularis	Brevundimonas	39
L1-13CB-S1-Y	OM164124	B01	Control/Healthy Silks	L	CO444	B	799F	3	0.00420757	TACCNTNNTACGACTTAGCCCCAGTTATCGGTTTTACCCTAGGACGCTCCTTGCGGTTACATACTTTAGGTACCCCCAACTTCCATGGCTTGACGGGCGGTGTGTACAAGGCCCGGGAACGTATTCACCGCGTCATTGCTGATACGCGATTACTAGCGAATCCAACTTCATGGGGTCGAGTTGCAGACCCCAATCCGAACTGTGAACGGCTTTGTGAGATTCGCACCATATTGCTATGTAGCTGCCCTCTGTACCGTCCATTGTAGCACGTGTGTAGCCCCGGACGTAAGGGCCATGATGACTTGACGTCGTCCCCTCCTTCCTCTCTGTTTGCACAGGCAGTCTGTTTAGAGTCCCCACCTTAACGTGCTGGCAACTAAACATAGGGGTTGCGCTCGT…	713	Bacteroidota	Sphingobacteriia	Sphingobacteriales	Sphingobacteriaceae	Pedobacter	0	1241	98.6	Pedobacter terrae	Pedobacter	299
L1-8CB-W	OM164126	B03	Control/Healthy Silks	L	CO325	B	799F	5	0.00692521	TACGACTTAGTCCTAATTACCGATCCCACCTTCGACGGCTCCCTCNNCCACAAGGGTTGGGCCACCGGCTTCAGGTGTTACCGACTTTCATGACTTGACGGGCGGTGTGTACAAGACCCGGGAACGTATTCACCGCAGCGTTGCTGATCTGCGATTACTAGCGACTCCGACTTCATGAGGTCGAGTTGCAGACCTCAATCCGAACTGGGACCGGCTTTTTGGGATTCGCTCCACCTTACGGTATTGCAGCCCTTTGTACCGGCCATTGTAGCATGCGTGAAGCCCAAGACATAAGGGGCATGATGATTTGACGTCATCCCCACCTTCCTCCGAGTTGACCCCGGCAGTATCCCATGAGTTCCCACCATTACGTGCTGGCAACATAGAACGAGGGTTGCG…	722	Actinomycetota	Actinomycetia	Micrococcales	Microbacteriaceae	Microbacterium	Microbacterium testaceum	1267	99.03	Microbacterium testaceum	Microbacterium	190&191
L1-8CB-X	OM164127	B04	Control/Healthy Silks	L	CO325	B	799F	0	0	GACTTCACCCCAGTCGCTGACCCTACCGTGGTCGCCTGCCCCCTTGCGGTTAGCGCAGCGCCTTCGGGTAAAACCAACTCCCATGGTGTGACGGGCGGTGTGTACAAGGCCCGGGAACGTATTCACCGCAGCATGCTGATCTGCGATTACTAGCGATTCCAACTTCATGCACTCGAGTTGCAGAGTGCAATCCGAACTGAGATGGCTTTTGGAGATTAGCTCGACATCGCTGTCTCGCTGCCCACTGTCACCACCATTGTAGCACGTGTGTAGCCCAGCCCGTAAGGGCCATGAGGACTTGACGTCATCCCCACCTTCCTCTCGGCTTATCACCGGCAGTCCCCTTAGAGTGCCCAACTGAATGCTGGCAACTAAGGGCGAGGGTTGCGCTCGTTGCGG…	706	Pseudomonadota	Alphaproteobacteria	Hyphomicrobiales	Rhizobiaceae	Agrobacterium	Agrobacterium larrymoorei	1261	99.58	Agrobacterium larrymoorei	Agrobacterium	13
L1-8CB-Y	OM164128	B05	Control/Healthy Silks	L	CO325	B	799F	7	0.0111111	TTGTGCCCTTGAGGCGTGGCTTCCGGAGCTAACGCGTTAAGTCGACCGCCTGGGGAGTACGGCCGCAAGGTTAAAACTCAAATGAATTGACGGGGGCCCGCACAAGCGGTGGAGCATGTGGTTTAATTCGATGCAACGCGAAGAACCTTACCTACTCTAGACATCCACGGAACTTGGNCAGAGNNGNCNNTGGCGCCTTCGGGAACCGTGAGACAGGTGCTGCATGGCTGTCGTCAGCTCGTGTTGTGAAATGTTGGGTTAAGTCCCGCAACGAGCGCAACCCTTATCCTTTGTTGCCAGCGGTTCGGCCGGGAACTCAAAGGAAACTGCCAGTGATAAACTGGAAGAAGGTGGGGATGAAGTCAAGTCATCATGGCCCTTACGAATAAGGGCTACACA…	630	Pseudomonadota	Gammaproteobacteria	Enterobacterales	Enterobacteriaceae	0	0	1040	96.83	Pseudescherichia vulneris	Pseudescherichia	304
L1-8CT-P1-X	OM164129	B07	Control/Healthy Silks	L	CO325	T	799F	0	0	CGACTTCACCCCAGTCATGAATCACAAAGTGGTAAGCGCCCTCCCGAAGGTTAAGCTACCTACTTCTTTTGCAACCCACTCCCATGGTGTGACGGGCGGTGTGTACAAGGCCCGGGAACGTATTCACCGTGGCATTCTGATCCACGATTACTAGCGATTCCGACTTCACGGAGTCGAGTTGCAGACTCCGATCCGGACTACGACGCACTTTATGAGGTCCGCTTGCTCTCGCGAGGTCGCTTCTCTTTGTATGCGCCATTGTAGCACGTGTGTAGCCCTACTCGTAAGGGCCATGATGACTTGACGTCATCCCCACCTTCCTCCGGTTTATCACCGGCAGTCTCCTTTGAGTTCCCGACCGAATCGCTGGCAACAAAGGATAAGGGTTGCGCTCGTTGC…	718	Pseudomonadota	Gammaproteobacteria	Enterobacterales	Erwiniaceae	0	0	1280	99.58	Pantoea anthophila/Pantoea ananatis*	Pantoea	274&276
L1-17CB-Z	OM164130	B08	Control/Healthy Silks	L	P35837	B	799F	0	0	GACTTCACCCCAGTCATGAATCACAAAGTGGTAAGCGCCCTCCCGAAGGTTAAGCTACCTACTTCTTTTGCAACCCACTCCCATGGTGTGACGGGCGGTGTGTACAAGGCCCGGGAACGTATTCACCGTGGCATTCTGATCCACGATTACTAGCGATTCCGACTTCACGGAGTCGAGTTGCAGACTCCGATCCGGACTACGACGCACTTTATGAGGTCCGCTTGCTCTCGCGAGGTCGCTTCTCTTTGTATGCGCCATTGTAGCACGTGTGTAGCCCTACTCGTAAGGGCCATGATGACTTGACGTCATCCCCACCTTCCTCCGGTTTATCACCGGCAGTCTCCTTTGAGTTCCCGACCGAATCGCTGGCAACAAAGGATAAGGGTTGCGCTCGTTGCG…	703	Pseudomonadota	Gammaproteobacteria	Enterobacterales	Erwiniaceae	Pantoea	0	1264	99.86	Pantoea anthophila/Pantoea ananatis*	Pantoea	288&289&290&291&292&410
L1-8CB-V	OM164131	B10	Control/Healthy Silks	L	CO325	B	799F	3	0.00413793	TACCTTGTTACGACTTCACCCCNNTCNTCGGCCACACCGTGGTAAGCGTCCTCCTTGCGGTTAGACTACCTACTTCTGGTGCAACAAACTCCCATGGTGTGACGGGCGGTGTGTACAAGGCCCGGGAACGTATTCACCGCGGCATTCTGATCCGCGATTACTAGCGATTCCGACTTCATGGAGTCGAGTTGCAGACTCCAATCCGGACTACGATCGGCTTTTTGAGATTAGCATCCTATCGCTAGGTAGCAACCCTTTGTACCGACCATTGTAGCACGTGTGTAGCCCTGGCCGTAAGGGCCATGATGACTTGACGTCGTCCCCGCCTTCCTCCAGTTTGTCACTGGCAGTATCCTTAAAGTTCCCGACATTACTCGCTGGCAAATAAGGAAAAGGGTT…	725	Pseudomonadota	Gammaproteobacteria	Pseudomonadales	Moraxellaceae	Acinetobacter	0	1297	99.59	Acinetobacter tjernbergiae/Acinetobacter calcoaceticus*	Acinetobacter	10
L1-13CB-M1W	OM240979	B12	Control/Healthy Silks	L	CO444	B	27F	48	0.046332	TGCAAGTCGAACGGTAACAGGCCGCAAGGTGCTGACGAGTGGCGAACGGGTGAGTAATACATCGGAACGTGCCCGATCGTGGGGGATAACGCAGCGAAAGCTGTGCTAATACCGCATACGATCTACGGATGAAAGCGGGGGATCGCAAGACCTCGCGCGGACGGAGCGGCCGATGGCAGATTAGGTAGTTGGTGGGGTAAAGGCCTACCAAGCCGACGATCTGTAGCTGGTCTGAGAGGACGACCAGCCACACTGGGACTGAGACACGGCCCAGACTCCTACGGGAGGCAGCAGTGGGGAATTTTGGACAATGGGCGCAAGCCTGATCCAGCCATGCCGCGTGCAGGATGAAGGCCTTCGGGTTGTAAACTGCTTTTGTACGGAACGAAAAGGTTTCTT…	1036	Pseudomonadota	Betaproteobacteria	Burkholderiales	Comamonadaceae	0	0	1669	95	Pseudacidovorax intermedius	Pseudacidovorax	303
L1-13CB-M1/100-Z	OM164135	B19	Control/Healthy Silks	L	CO444	B	799F	0	0	ACTTCACCCCAGTCGCTGACCCTACCGTGGTCGCCTGCCCCCTTGCGGTTAGCGCAGCGCCTTCGGGTAAAACCAACTCCCATGGTGTGACGGGCGGTGTGTACAAGGCCCGGGAACGTATTCACCGCAGCATGCTGATCTGCGATTACTAGCGATTCCAACTTCATGCACTCGAGTTGCAGAGTGCAATCCGAACTGAGATGGCTTTTGGAGATTAGCTCGACATCGCTGTCTCGCTGCCCACTGTCACCACCATTGTAGCACGTGTGTAGCCCAGCCCGTAAGGGCCATGAGGACTTGACGTCATCCCCACCTTCCTCTCGGCTTATCACCGGCAGTCCCCTTAGAGTGCCCAACT-AAATGCTGGCAACTAAGGGCGAGGGTTGCGCTCGTTGCGG…	706	Pseudomonadota	Alphaproteobacteria	Hyphomicrobiales	Rhizobiaceae	Agrobacterium	Agrobacterium larrymoorei	1264	99.72	Agrobacterium larrymoorei	Agrobacterium	12
L1-13CB-S1-X	OM164136	C01	Control/Healthy Silks	L	CO444	B	799F	1	0.00140845	TANGACTTCACCCCAATCATCTATCCCACCTTAGGCGGCTGGCTCCAAAAAGGTTACCTCACCGACTTCGGGTGTTACAAACTCTCGTGGTGTGACGGGCGGTGTGTACAAGGCCCGGGAACGTATTCACCGCGGCGTGCTGATCCGCGATTACTAGCGATTCCGGCTTCATGCAGGCGAGTTGCAGCCTGCAATCCGAACTGAGAGAAGCTTTAAGAGATTTGCATGACCTCGCGGTCTAGCGACTCGTTGTACTTCCCATTGTAGCACGTGTGTAGCCCAGGTCATAAGGGGCATGATGATTTGACGTCATCCCCACCTTCCTCCGGTTTGTCACCGGCAGTCTCGCTAGAGTGCCCAACTAAATGATGGCAACTAACAATAAGGGTTGCGCTCGTT…	710	Bacillota	Bacilli	Lactobacillales	Enterococcaceae	Enterococcus	Enterococcus faecalis	1278	99.86	Enterococcus faecalis	Enterococcus	86
L1-13CB-S1V	OM164137	C02	Control/Healthy Silks	L	CO444	B	27F	10	0.00714796	AGTCGAGCGGAGTTGATNNAGAAGCTTGCTTCCTTGATANNTTAGCGGCGGACGGGTGAGTAACACGTAGGCAACCTGCCCTCAAGTTTGGGACAACTACCGGAAACGGTAGCTAATACCGAATAATTGTTTTCTTCGCCTGAAGGAAACTGGAAAGACGGAGCAATCTGTCACTTGGGGATGGGCCTGCGGCGCATTAGCTAGTTGGTGAGGTAACGGCTCACCAAGGCGACGATGCGTAGCCGACCTGAGAGGGTGATCGGCCACACTGGGACTGAGACACGGCCCAGACTCCTACGGGAGGCAGCAGTAGGGAATCTTCCGCAATGGGCGAAAGCCTGACGGAGCAATGCCGCGTGAGTGATGAAGGTTTTCGGATCGTAAAGCTCTGTTGCCAGG…	1399	Bacillota	Bacilli	Bacillales	Paenibacillaceae	Paenibacillus	0	2451	98.86	Paenibacillus mobilis	Paenibacillus	197
L1-13CB-M1-Z	OM240969	C03	Control/Healthy Silks	L	CO444	B	799F	21	0.0253623	TGCAACTCGACTCTATGAAGCTGGAATCGCTAGTAATCGCGCANCAGCCATGGCGCGGTGAATACGTTCCCGGGCCTTGTACACACCGCCCGTCAAGCCATGGAAGTCTGGGGNACNNNTNNNNNNTTNNNNNNNNNNGACTTAGCCCTAGTTACCTGTTTTACCCTAGGCAGCTCCTTTTACGGTCACCGACTTCAGGTACCCCAGACTTCCATGGCTTGACGGGCGGTGTGTACAAGGCCCGGGAACGTATTCACCGCGCCATGGCTGATGCGCGATTACTAGCGATTCCAGCTTCATAGAGTCGAGTTGCAGACTCCAATCCGAACTGAGACAGGCTTTCGAGATTCGCATCACATCGCTGTGTAGCTGCCCTCTGTACCTGCCATTGTATTACGT…	828	Bacteroidota	Flavobacteriia	Flavobacteriales	Weeksellaceae	Chryseobacterium	0	1218	99.13	Chryseobacterium daeguense	Chryseobacterium	44
L1-16CT-Y	OM164138	C04 AKA H20	Control/Healthy Silks	L	CO462	T	799F	1	0.00140252	CCCTGGTAGTCCACGCCGTAAACGATGTCGACTTGGAGGTTGTGCCCTTGAGGCGTGGCTTCCGGAGCTAACGCGTTAAGTCGACCGCCTGGGGAGTACGGCCGCAAGGTTAAAACTCAAATGAATTGACGGGGGCCCGCACAAGCGGTGGAGCATGTGGTTTAATTCGATGCAACGCGAAGAACCTTACCTGGTCTTGACATCCACAGAACTTGGCAGAGATGCCTTGGTGCCTTCGGGAACTGTGAGACAGGTGCTGCATGGCTGTCGTCAGCTCGTGTTGTGAAATGTTGGGTTAAGTCCCGCAACGAGCGCAACCCTTATCCTTTGTTGCCAGCGGTCCGGCCGGGAACTCAAAGGAGACTGCCAGTGATAAACTGGAGGAAGGTGGGGATGACG…	713	Pseudomonadota	Gammaproteobacteria	Enterobacterales	Enterobacteriaceae	0	0	1251	98.88	Kosakonia oryzae	Kosakonia	151
L1-5CB-Y	OM262833	C07	Control/Healthy Silks	L	CO431	B	799F	2	0.00282486	CCCTNNTACGACTTCACCCCAGTCATGAATCACAAAGTGGTAAGCGCCCTCCCGAAGGTTAAGCTACCTACTTCTTTTGCAACCCACTCCCATGGTGTGACGGGCGGTGTGTACAAGGCCCGGGAACGTATTCACCGTGGCATTCTGATCCACGATTACTAGCGATTCCGACTTCATGGAGTCGAGTTGCAGACTCCAATCCGGACTACGACATACTTTATGAGGTCCGCTTGCTCTCGCGAGGTCGCTTCTCTTTGTATATGCCATTGTAGCACGTGTGTAGCCCTACTCGTAAGGGCCATGATGACTTGACGTCATCCCCACCTTCCTCCAGTTTATCACTGGCAGTCTCCTTTGAGTTCCCGGCCGGACCGCTGGCAACAAAGGATAAGGGTTGCG…	708	Pseudomonadota	Gammaproteobacteria	Enterobacterales	Enterobacteriaceae	0	0	1253	99.57	Klebsiella oxytoca/Citrobacter murliniae/Citrobacter braaki*	Klebsiella/ Citrobacter*	129&130&136&397
L1-5CB-W	OM164140	C08	Control/Healthy Silks	L	CO431	B	799F	2	0.00282885	GACTTCACCCCAATCATCTACCCCACNTTCGACGGCTGGCTCCTTGCGGTTACCTCACCGGCTTCGGGTGTTGCAAACTCTCGTGGTGTGACGGGCGGTGTGTACAAGACCCGGGAACGTATTCACCGCAGTATGCTGACCTGCGATTACTAGCGATTCCGACTTCATGCAGGCGAGTTGCAGCCTGCAATCCGAACTGGGAACGGCTTTATGGGATTGGCTCCACCTCGCGGTCTCGCTGCCCTTTGTACCGTCCATTGTAGCACGTGTGTAGCCCAACTCATAAGGGGCATGATGATTTGACGTCATCCCCACCTTCCTCCGGTTTGTCACCGGCAGTCTCCCTAGAGTGCCCAACTAAATGCTGGCAACTAAGGATAGGGGTTGCGCTCGTTGCGG…	707	Bacillota	Bacilli	Bacillales	Bacillaceae	Exiguobacterium	Exiguobacterium acetylicum	1269	99.72	Exiguobacterium acetylicum	Exiguobacterium	105
L1-3CT-100-Z	OM164141	C09	Control/Healthy Silks	L	CO433	T	799F	1	0.00142857	GACTTCACCCCAGTCATGAATCACAAAGTGGTAAACGCCCTCCCGAAGGTTAAGCTATCTACTTCTTTTGCAACCCACTCCCATGGTGTGACGGGCGGTGTGTACAAGGCCCGGGAACGTATTCACCGTAACATTCTGATTTACGATTACTAGCGATTCCGACTTCATGGAGTCGAGTTGCAGACTCCAATCCGGACTACGACGCACTTTATGAGGTCCGCTTGCTCTCGCGAGGTCGCTTCTCTTTGTATGCGCCATTGTAGCACGTGTGTAGCCCTACTCGTAAGGGCCATGATGACTTGACGTCATCCCCACCTTCCTCCGGTTTATCACCGGCAGTCTCCTTTGAGTTCCCACCATTACGTGCTGGCAACAAAGGATAAGGGTTGCGCTCGTTGC…	700	Pseudomonadota	Gammaproteobacteria	Enterobacterales	Enterobacteriaceae	Rosenbergiella	0	1260	99.86	Rosenbergiella collisarenosi/Rosenbergiella epipactidis*	Rosenbergiella	337
L1-3CT-100-Y	OM164142	C10	Control/Healthy Silks	L	CO433	T	799F	3	0.00420168	TTACCCNNNGTACGACTTAGCCCCAGTTACCGGTTTTACCCTAGGACGCTCCTTGCGGTTACATACTTTAGGTACCCCCAGCTTCCATGGCTTGACGGGCGGTGTGTACAAGGCCCGGGAACGTATTCACCGCGTCATTGCTGATACGCGATTACTAGCGAATCCAACTTCATGGGGTCGAGTTGCAGACCCCAATCCGAACTGTGAACGGCTTTGTGAGATTCGCATCATATTGCTATGTAGCTGCCCTCTGTACCGTCCATTGTAGCACGTGTGTAGCCCCGGACGTAAGGGCCATGATGACTTGACGTCGTCCCCTCCTTCCTCTCTGTTTGCACAGGCAGTCTGTTTAGAGTCCCCACCATTACATGCTGGCAACTAAACATAGGGGTTGCGCTC…	714	Bacteroidota	Sphingobacteriia	Sphingobacteriales	Sphingobacteriaceae	Pedobacter	Pedobacter suwonensis	1252	99.71	Pedobacter suwonensis	Pedobacter	298
L1-6CT-V	OM164144	C12	Control/Healthy Silks	L	CO430	T	799F	0	0	GACTTCACCCCAGTCGCTGACCCTACCGTGGTCGCCTGCCTCCTTGCGGTCAGCGCAGCGCCTTCGGGTAGAACCAACTCCCATGGTGTGACGGGCGGTGTGTACAAGGCCCGGGAACGTATTCACCGCGGCATGCTGATCCGCGATTACTAGCGATTCCAACTTCATGCCCTCGAGTTGCAGAGGACAATCCGAACTGAGACGACTTTTAAGGATTAACCCTCTGTAGTCGCCATTGTAGCACGTGTGTAGCCCACCCTGTAAGGGCCATGAGGACTTGACGTCATCCCCACCTTCCTCCGGCTTAGCACCGGCAGTCCCATTAGAGTTCCCAACTAAATGATGGCAACTAATGGCGAGGGTTGCGCTCGTTGCGGGACTTAACCCAACATCTCACGA…	681	Pseudomonadota	Alphaproteobacteria	Caulobacterales	Caulobacteraceae	Brevundimonas	Brevundimonas vesicularis	1229	100	Brevundimonas vesicularis	Brevundimonas	39
L1-6CT-W	OM262835	C13	Control/Healthy Silks	L	CO430	T	799F	1	0.00142045	GACTTCACCCCAGTCATGAATCACAAAGTGGTAAGCGCCCTCCCGAAGGTTAAGCTACCTACTTCTTTTGCAACCCACTCCCATGGTGTGACGGGCGGTGTGTACAAGGCCCGGGAACGTATTCACCGTAGCATTCTGATCTACGATTACTAGCGATTCCGACTTCACGGAGTCGAGTTGCAGACTCCGATCCGGACTACGACGCACTTTATGAGGTCCGCTTGCTCTCGCGAGGTCGCTTCTCTTTGTATGCGCCATTGTAGCACGTGTGTAGCCCTACTCGTAAGGGCCATGATGACTTGACGTCATCCCCACCTTCCTCCAGTTTATCACTGGCAGTCTCCTTTGAGTTCCCGGCCGAACCGCTGGCAACAAAGGATAAGGGTTGCGCTCGTTGCG…	704	Pseudomonadota	Gammaproteobacteria	Enterobacterales	Enterobacteriaceae	0	0	1249	99.29	Cedecea lapagei/Leclercia adecarboxylata*	Cedecea/Leclercia*	42
L1-6CT-X	OM164145	C14	Control/Healthy Silks	L	CO430	T	799F	4	0.00548697	TTNCCNTTTGTACGACTTCACCCCAATCATCTACCCCACNTTCGACGGCTGGCTCCTTGCGGTTACCTCACCGGCTTCGGGTGTTGCAAACTCTCGTGGTGTGACGGGCGGTGTGTACAAGACCCGGGAACGTATTCACCGCAGTATGCTGACCTGCGATTACTAGCGATTCCGACTTCATGCAGGCGAGTTGCAGCCTGCAATCCGAACTGGGAACGGCTTTATGGGATTGGCTCCACCTCGCGGTCTCGCTGCCCTTTGTACCGTCCATTGTAGCACGTGTGTAGCCCAACTCATAAGGGGCATGATGATTTGACGTCATCCCCACCTTCCTCCGGTTTGTCACCGGCAGTCTCCCTAGAGTGCCCAACTGAATGCTGGCAACTAAGGATAGGGGTT…	729	Bacillota	Bacilli	Bacillales	Bacillaceae	Exiguobacterium	0	1286	99.58	Exiguobacterium acetylicum/Exiguobacterium indicum*	Exiguobacterium	103&104
L1-6CT-Z	OM164146	C15	Control/Healthy Silks	L	CO430	T	799F	13	0.0176391	TACCNNTTGTACGACTTCACCCCAATCATCTACCCCACNTTCGACGGTCNNNNNTGGCTCCTTGCGGTTACCTCACCGGCTTCGGGTGTTGCAAACTCTCGTGGTGTGACGGGCGGTGTGTACAAGACCCGGGAACGTATTCACCGCAGTATGCTGACCTGCGATTACTAGCGATTCCGACTTCATGCAGGCGAGTTGCAGCCTGCAATCCGAACTGGGAACGGCTTTATGGGATTGGCTCCACCTCGCGGTCTCGCTGCCCTTTGTACCGTCCATTGTAGCACGTGTGTAGCCCAACTCATAAGGGGCATGATGATTTGACGTCATCCCCACCTTCCTCCGGTTTGTCACCGGCAGTCTCCCTAGAGTGCCCAACTGAATGCTGGCAACTAAGGATAG…	737	Bacillota	Bacilli	Bacillales	Bacillaceae	0	0	1250	97.94	Exiguobacterium acetylicum/Exiguobacterium indicum*	Exiguobacterium	103&104
L1-6CT-Y	OM164147	C16	Control/Healthy Silks	L	CO430	T	799F	0	0	CGACTTCACCCCAGTCATCGGCCACACCGTGGTAAGCGTCCTCCTTGCGGTTAGACTACCTACTTCTGGTGCAACAAACTCCCATGGTGTGACGGGCGGTGTGTACAAGGCCCGGGAACGTATTCACCGCGGCATTCTGATCCGCGATTACTAGCGATTCCGACTTCATGGAGTCGAGTTGCAGACTCCAATCCGGACTACGATCGGCTTTTTGAGATTAGCATCCTATCGCTAGGTAGCAACCCTTTGTACCGACCATTGTAGCACGTGTGTAGCCCTGGCCGTAAGGGCCATGATGACTTGACGTCGTCCCCGCCTTCCTCCAGTTTGTCACTGGCAGTATCCTTAAAGTTCCCGACATTACTCGCTGGCAAATAAGGAAAAGGGTTGCGCTCGTTG…	704	Pseudomonadota	Gammaproteobacteria	Pseudomonadales	Moraxellaceae	Acinetobacter	Acinetobacter dispersus	1301	100	Acinetobacter dispersus	Acinetobacter	4
L1-13CT-Z	OM164148	C17	Control/Healthy Silks	L	CO444	T	799F	0	0	ACGACTTAGTCCTAATTACCGATCCCACCTTCGACGGCTCCCTCCACAAGGGTTGGGCCACCGGCTTCAGGTGTTACCGACTTTCATGACTTGACGGGCGGTGTGTACAAGACCCGGGAACGTATTCACCGCAGCGTTGCTGATCTGCGATTACTAGCGACTCCGACTTCATGAGGTCGAGTTGCAGACCTCAATCCGAACTGGGACCGGCTTTTTGGGATTCGCTCCACCTCGCGGTATTGCAGCCCTTTGTACCGGCCATTGTAGCATGCGTGAAGCCCAAGACATAAGGGGCATGATGATTTGACGTCATCCCCACCTTCCTCCGAGTTGACCCCGGCAGTATCCCATGAGTTCCCACCATTACGTGCTGGCAACATAGAACGAGGGTTGCGCTCG…	708	Actinomycetota	Actinomycetia	Micrococcales	Microbacteriaceae	Microbacterium	Microbacterium schleiferi	1297	99.72	Microbacterium schleiferi	Microbacterium	181
L1-13CT-Y	OM164149	C18	Control/Healthy Silks	L	CO444	T	799F	1	0.00141243	GACTTCACCCCAGTCGCTGACCCTACCGTGGTCGCCTGCCCCCTTGCGGTTAGCGCAGCGCCTTCGGGTAAAACCAACTCCCATGGTGTGACGGGCGGTGTGTACAAGGCCCGGGAACGTATTCACCGCAGCATGCTGATCTGCGATTACTAGCGATTCCAACTTCATGCACTCGAGTTGCAGAGTGCAATCCGAACTGAGATGGCTTTTGGAGATTAGCTCGACATCGCTGTCTCGCTGCCCACTGTCACCACCATTGTAGCACGTGTGTAGCCCAGCCCGTAAGGGCCATGAGGACTTGACGTCATCCCCACCTTCCTCTCGGCTTATCACCGGCAGTCCCCTTAGAGTGCCCAACTAAATGCTGGCAACTAAGGGCGAGGGTTGCGCTCGTTGCGG…	708	Pseudomonadota	Alphaproteobacteria	Hyphomicrobiales	Rhizobiaceae	Agrobacterium	Agrobacterium larrymoorei	1295	99.58	Agrobacterium larrymoorei	Agrobacterium	12
L1-3CT-T	OM164150	C19	Control/Healthy Silks	L	CO433	T	799F	0	0	CGACTTAGTCCTAATTACCGATCCCACCTTCGACGGCTCCCTCCACAAGGGTTAGGCCACCGGCTTCAGGTGTTACCGACTTTCATGACTTGACGGGCGGTGTGTACAAGACCCGGGAACGTATTCACCGCAGCGTTGCTGATCTGCGATTACTAGCGACTCCGACTTCATGAGGTCGAGTTGCAGACCTCAATCCGAACTGGGACCGGCTTTTTGGGATTCGCTCCACCTCACGGTATTGCAGCCCTTTGTACCGGCCATTGTAGCATGCGTGAAGCCCAAGACATAAGGGGCATGATGATTTGACGTCATCCCCACCTTCCTCCGAGTTGACCCCGGCAGTATCCCATGAGTTCCCACCATTACGTGCTGGCAACATAGAACGAGGGTTGCGCTCGT…	707	Actinomycetota	Actinomycetia	Micrococcales	Microbacteriaceae	Microbacterium	Microbacterium testaceum	1301	99.86	Microbacterium testaceum	Microbacterium	184
L1-13CT-U	OM164151	C20	Control/Healthy Silks	L	CO444	T	799F	0	0	CGACTTAGTCCCAATCACCAGTCCCACCTTCGACGGCTCCCCCCACAAGGGTTGGGCCACCGGCTTCGGGTGTTACCGACTTTCGTGACTTGACGGGCGGTGTGTACAAGGCCCGGGAACGTATTCACCGCAGCGTTGCTGATCTGCGATTACTAGCGACTCCGACTTCATGGGGTCGAGTTGCAGACCCCAATCCGAACTGAGACCGGTTTTTTGGGATTCGCTCCACCTTGCGGTATCGCAGCCCTTTGTACCGGCCATTGTAGCATGCGTGAAGCCCAAGACATAAGGGGCATGATGATTTGACGTCATCCCCACCTTCCTCCGAGTTGACCCCGGCAGTCTCCTATGAGTCCCCACCATGACGTGCTGGCAACATAGAACGAGGGTTGCGCTCGT…	707	Actinomycetota	Actinomycetia	Micrococcales	Intrasporangiaceae	Janibacter	Janibacter melonis	1290	99.58	Janibacter melonis	Janibacter	116
L1-16CT-T	OM241003	C21	Control/Healthy Silks	L	CO462	T	799F	3	0.00442478	GGNGCTAGGTGTGGGANTCNTTCCACGAGTTCCGTGCCGCAGCTAACGCATTAAGCGCCCCGCCTGGGGAGTACGGCCGCAAGGCTAAAACTCAAAGGAATTGACGGGGGCCCGCACAAGCGGCGGAGCATGCGGATTAATTCGATGCAACGCGAAGAACCTTACCAAGGCTTGACATATACCGGAAACATCCAGAGATGGGTGCCCCTTTTGGTCGGTATACAGGTGGTGCATGGTTGTCGTCAGCTCGTGTCGTGAGATGTTGGGTTAAGTCCCGCAACGAGCGCAACCCTCGTTCTATGTTGCCAGCACGTCATGGTGGGGACTCATAGGAGACTGCCGGGGTCAACTCGGAGGAAGGTGGGGATGACGTCAAATCATCATGCCCCTTATGTCTTG…	678	Actinomycetota	Actinomycetia	Micrococcales	Intrasporangiaceae	Janibacter	Janibacter melonis	1225	99.12	Janibacter melonis	Janibacter	116
L1-6CT-T	OM240971	C22	Control/Healthy Silks	L	CO430	T	799F	1	0.00137931	CGACTTCACCCCAATCATCTGTCCCACCTTAGGCGGCTGGCTCCATGAAGGTTACCTCACCGACTTCGGGTGTTACAAACTCTCGTGGTGTGACGGGCGGTGTGTACAAGGCCCGGGAACGTATTCACCGCGGCATGCTGATCCGCGATTACTAGCGATTCCGGCTTCATGCAGGCGAGTTGCAGCCTGCAATCCGAACTGAGAATGGCTTTATGGGATTCGCTTACCTTCGCAGGTTTGCAGCCCTTTGTACCATCCATTGTAGCACGTGTGTAGCCCAGGTCATAAGGGGCATGATGATTTGACGTCATCCCCACCTTCCTCCGGTTTGTCACCGGCAGTCACCTTAGAGTGCCCAACTGAATGCTGGCAACTAAGATCAAGGGTTGCGCTCGTTGC…	725	Bacillota	Bacilli	Bacillales	Bacillaceae	Bacillus	Bacillus frigoritolerans	1330	100	Bacillus frigoritolerans	Bacillus	37
L1-5CB-U	OM164152	C23	Control/Healthy Silks	L	CO431	B	799F	0	0	CGACTTAGTCCTAATCACCAGTCCCACCTTCGACGGCTCCCTCCACAAGGGTTAGGCCACCGGCTTCGGGTGTTACCGACTTTCATGACTTGACGGGCGGTGTGTACAAGGCCCGGGAACGTATTCACCGCAGCGTTGCTGATCTGCGATTACTAGCGACTCCGACTTCATGGGGTCGAGTTGCAGACCCCAATCCGAACTGAGACCGGCTTTTTGGGATTCGCTCCACCTCGCGGTATCGCAGCCCATTGTACCGGCCATTGTAGCATGCGTGAAGCCCAAGACATAAGGGGCATGATGATTTGACGTCATCCCCACCTTCCTCCGTGTTGACCACGGCAGTATCCCATGAGTTCCCACCATTACGTGCTGGCAACATAGGACGAGGGTTGCGCTCGT…	718	Actinomycetota	Actinomycetia	Micrococcales	Microbacteriaceae	Leucobacter	Leucobacter tardus	1327	100	Leucobacter tardus	Leucobacter	169
L1-13CT-X	OM164153	C24	Control/Healthy Silks	L	CO444	T	799F	3	0.00437318	TAGCTGTCCGGGCACTTGGTGCTTGGGTGGCGCAGCTAACGCATTAAGTTATCCNNNTGGGGAGTACGGCCGCAAGGTTAAAACTCAAAGGAATTGACGGGGGCCTGCACAAGCGGTGGAGCATGTGGTTTAATTCGAAGCAACGCGCAGAACCTTACCAGCGTTTGACATGTCCGGACGACTGGCAGAGATGCCTTTCTTCCCTTCGGGGACTGGAACACAGGTGCTGCATGGCTGTCGTCAGCTCGTGTCGTGAGATGTTGGGTTAAGTCCCGCAACGAGCGCAACCCTCGCCTTTAGTTACCATCATTAAGTTGGGTACTCTAAAGGAACCGCCGGTGATAAGCCGGAGGAAGGTGGGGATGACGTCAAGTCCTCATGGCCCTTACGCGCTGGGCT…	686	Pseudomonadota	Alphaproteobacteria	Sphingomonadales	Sphingomonadaceae	Sphingomonas	Sphingomonas yabuuchiae	1234	98.98	Sphingomonas yabuuchiae	Sphingomonas	354
L1-6CT-X.1	OM164154	D02	Control/Healthy Silks	L	CO430	T	799F	2	0.00292826	TAGGTGTTGGGGGGTTTCCGCCCCTCAGTGCTGAAGCTAACGCATTAAGCACTCCGCCTGGGGAGTACGGCCGCAAGGCTGAAACTCAAAGGAATTGACGGGGACCCGCACAAGCGGTGGAGCATGTGGTTTAATTCGAAGCAACGCGAAGAACCTTACCAACTCTTGACATCCCATTGACCGCTTGAGAGATCAAGTTTTCCCTTCGGGGACAATGGTGACAGGTGGTGCATGGTTGTCGTCAGCTCGTGTCGTGAGATGTTGGGTTAAGTCCCGCAAAGAGCGCAACCCCTATCCTTAGTTGCCAGCATTCAGTTGGGCACTCTAGGGAGACTGCCGGTGACAAACCGGAGGAAGGTGGGGATGACGTCAAATCATCATGCCCCTTATGAGTTGGGC…	683	Bacillota	Bacilli	Bacillales	Bacillaceae	Exiguobacterium	0	1216	99.41	Exiguobacterium acetylicum/Exiguobacterium indicum*	Exiguobacterium	98
L1-8CT-M1-X	OM164155	D03	Control/Healthy Silks	L	CO325	T	27F	23	0.0166546	GCAGCACAGGNGAGCTTGCTCTCTGGGTGGCGAGTGGCGGACGGGTGAGGAATACATCGGAATCTACTCTGTCGTGGGGGATAACGTAGGGAAACTTACGCTAATACCGCATACGACCTACGGGTGAAAGCAGGGGATCTTCGGGCCTTGCGCGATTGAATGAGCCGATGTCGGATTAGCTAGTTGGCGGGGTAAAGGCCCACCAAGGCGACGATCCGTAGCTGGTCTGAGAGGATGATCAGCCACACTGGAACTGAGACACGGTCCAGACTCCTACGGGAGGCAGCAGTGGGGAATATTGGACAATGGGCGCAAGCCTGATCCANCCNTACCGCGTGGGTGAAGAAGGCCTTCGGGTTGTAAAGCCCTTTTGTTGGGAAAGAAATCCAGCTGGCTAAT…	1381	Pseudomonadota	Gammaproteobacteria	Xanthomonadales	Xanthomonadaceae	0	0	2394	98.04	Stenotrophomonas pavanii	Stenotrophomonas	372
L1-5CB-T	OM164156	D04	Control/Healthy Silks	L	CO431	B	799F	2	0.00283688	GACTTCACCCCAGTCATGAATCACACCGTGGTAACCGTCCNCCCGAAGGTTAGACTAGCTACTTCTGGTGCAACCCACTCCCATGGTGTGACGGGCGGTGTGTACAAGGCCCGGGAACGTATTCACCGCGACATTCTGATTCGCGATTACTAGCGATTCCGACTTCACGCAGTCGAGTTGCAGACTGCGATCCGGACTACGATCGGTTTTGTGAGATTAGCTCCACCTCGCGGCTTGGCAACCCTCTGTACCGACCATTGTAGCACGTGTGTAGCCCAGGCCGTAAGGGCCATGATGACTTGACGTCATCCCCACCTTCCTCCGGTTTGTCACCGGCAGTCTCCTTAGAGTGCCCACCATAACGTGCTGGTAACTAAGGACAAGGGTTGCGCTCGTTAC…	705	Pseudomonadota	Gammaproteobacteria	Pseudomonadales	Pseudomonadaceae	Pseudomonas	0	1265	99.72	Pseudomonas wadenswilerensis/Pseudomonas donghuensis/etc.etc.*	Pseudomonas	314&315&316&317
L1-8CT-M1-Y	OM164157	D05	Control/Healthy Silks	L	CO325	T	799F	4	0.00556328	CGACTTAGTNNCTAATTACCGATCCCACNTTCGACGGCTCCCTCCACAAGGGTTGGGCCACCGGCTTCAGGTGTTACCGACTTTCATGACTTGACGGGCGGTGTGTACAAGACCCGGGAACGTATTCACCGCAGCGTTGCTGATCTGCGATTACTAGCGACTCCGACTTCATGAGGTCGAGTTGCAGACCTCAATCCGAACTGGGACCGGCTTTTTGGGATTCGCTCCACCTCACGGTATTGCAGCCCTTTGTACCGGCCATTGTAGCATGCGTGAAGCCCAAGACATAAGGGGCATGATGATTTGACGTCATCCCCACCTTCCTCCGAGTTGACCCCGGCAGTATCCCATGAGTTCCCACCATTACGTGCTGGCAACATAGAACGAGGGTTGCGCTCG…	719	Actinomycetota	Actinomycetia	Micrococcales	Microbacteriaceae	Microbacterium	Microbacterium arborescens	1268	99.44	Microbacterium arborescens	Microbacterium	177
L1-8CT-G1-Z	OM164158	D06	Control/Healthy Silks	L	CO325	T	799F	0	0	CGACTTAGTCCTAATTACCGATCCCACCTTCGACGGCTCCCTCCACAAGGGTTAGGCCACCGGCTTCAGGTGTTACCGACTTTCATGACTTGACGGGCGGTGTGTACAAGACCCGGGAACGTATTCACCGCAGCGTTGCTGATCTGCGATTACTAGCGACTCCGACTTCATGAGGTCGAGTTGCAGACCTCAATCCGAACTGGGACCGGCTTTTTGGGATTCGCTCCACCTCACGGTATCGCAGCCCTTTGTACCGGCCATTGTAGCATGCGTGAAGCCCAAGACATAAGGGGCATGATGATTTGACGTCATCCCCACCTTCCTCCGAGTTGACCCCGGCAGTATCCCATGAGTTCCCACCATTACGTGCTGGCAACATAGAACGAGGGTTGCGCTCGT…	709	Actinomycetota	Actinomycetia	Micrococcales	Microbacteriaceae	Microbacterium	Microbacterium testaceum	1299	99.72	Microbacterium testaceum	Microbacterium	175
L1-5CB-V.2	OM164159	D07	Control/Healthy Silks	L	CO431	B	799F	2	0.0027894	TTACGACTTCACCCCAGTCATGAATCACAAAGTGGTAAGCGCCCTCCCGAAGGTTAAGCTACCTACTTCTTTTGCAACCCACTCCCATGGTGTGACGGGCGGTGTGTACAAGGCCCGGGAACGTATTCACCGTAGCATTCTGATCTACGATTACTAGCGATTCCGACTTCATGGAGTCGAGTTGCAGACTCCAATCCGGACTACGACATACTTTATGAGGTCCGCTTGCTCTCGCGAGGTCGCTTCTCTTTGTATATGCCATTGTAGCACGTGTGTAGCCCTGGTCGTAAGGGCCATGATGACTTGACGTCATCCCCACCTTCCTCCAGTTTATCACTGGCAGTCTCCTTTGAGTTCCCGGCCNGACCGCTGGCAACAAAGGATAAGGGTTGCGCTCGT…	717	Pseudomonadota	Gammaproteobacteria	Enterobacterales	Enterobacteriaceae	0	0	1286	99.29	Klebsiella quasipneumoniae	Klebsiella	141
L1-3CT-U.1	OM164160	D08	Control/Healthy Silks	L	CO433	T	799F	3	0.00437956	GGANGCTGTTCCCTTGAGGAGTGGCTTCCGGAGCTAACGCGTTAAGTCGACCGCCTGGGGAGTACGGCCGCAAGGTTAAAACTCAAATGAATTGACGGGGGCCCGCACAAGCGGTGGAGCATGTGGTTTAATTCGATGCAACGCGAAGAACCTTACCTACTCTTGACATCCAGAGAATTTAGCAGAGATGCTTTAGTGCCTTCGGGAACTCTGAGACAGGTGCTGCATGGCTGTCGTCAGCTCGTGTTGTGAAATGTNTGGGTTAAGTCCCGCAACGAGCGCAACCCTTATCCTTTGTTGCCAGCACGTAATGGAGGGAACTCAAAGGAGACTGCCGGTGATAAACCGGAGGAAGGTGGGGATGACGGCAAGTCATCATGGCCCTTACGAGTAGGGCTA…	685	Pseudomonadota	Gammaproteobacteria	Enterobacterales	Enterobacteriaceae	Rosenbergiella	0	1232	99.27	Rosenbergiella collisarenosi/Rosenbergiella epipactidis	Rosenbergiella	335
L1-6CT-X.2	OM164161	D09	Control/Healthy Silks	L	CO430	T	799F	2	0.00273224	GGTTACCNNGTTACGACTTCACCCCAGTCATGAATCACTCCGTGGTAACCGTCCTCCCGAAGGTTAGACTAGCTACTTCTGGAGCAACCCACTCCCATGGTGTGACGGGCGGTGTGTACAAGGCCCGGGAACGTATTCACCGTGACGTTCTGATTCACGATTACTAGCGATTCCGACTTCACGCAGTCGAGTTGCAGACTGCGATCCGGACTACGATCGGTTTTATGGGATTAGCTCCACCTCGCGGCTTGGCAACCCTTTGTACCGACCATTGTAGCACGTGTGTAGCCCTGGCCGTAAGGGCCATGATGACTTGACGTCATCCCCACCTTCCTCCGGTTTGTCACCGGCAGTCTCCTTAGAGTGCCCACCATAACGTGCTGGTAACTAAGGACAAGG…	732	Pseudomonadota	Gammaproteobacteria	Pseudomonadales	Pseudomonadaceae	Pseudomonas	0	1328	99.45	Pseudomonas oryzihabitans	Pseudomonas	309
L1-16CT-X	OM164162	D10	Control/Healthy Silks	L	CO462	T	799F	1	0.00141643	GACTTCACCCCAGTCATGAATCACAAAGTGGTAAGCGCCCTCCCGAAGGTTAAGCTACCTACTTCTTTTGCAACCCACTCCCATGGTGTGACGGGCGGTGTGTACAAGGCCCGGGAACGTATTCACCGTGGCATTCTGATCCACGATTACTAGCGATTCCGACTTCACGGAGTCGAGTTGCAGACTCCGATCCGGACTACGACGCACTTTGTGAGGTCCGCTTGCTCTCGCGAGGTCGCTTCTCTTTGTATGCGCCATTGTAGCACGTGTGTAGCCCTACTCGTAAGGGCCATGATGACTTGACGTCATCCCCACCTTCCTCCGGTTTATCACCGGCAGTCTCCTTTGAGTTCCCGACCGAATCGCTGGCAACAAAGGATAAGGGTTGCGCTCGTTGCG…	706	Pseudomonadota	Gammaproteobacteria	Enterobacterales	Erwiniaceae	Pantoea	0	1280	99.15	Pantoea agglomerans	Pantoea	231
L1-3CT-U	OM164163	D12	Control/Healthy Silks	L	CO433	T	799F	6	0.0083682	GTTANCCCNNNTANGACTTCACCCCAGTCATGAATCACAAAGTGGTAAACGCCCTCCCGAAGGTTAAGCTATCTACTTCTTTTGCAACCCACTCCCATGGTGTGACGGGCGGTGTGTACAAGGCCCGGGAACGTATTCACCGTAACATTCTGATTTACGATTACTAGCGATTCCGACTTCATGGAGTCGAGTTGCAGACTCCAATCCGGACTACGACGCACTTTATGAGGTCCGCTTGCTCTCGCGAGGTCGCTTCTCTTTGTATGCGCCATTGTAGCACGTGTGTAGCCCTACTCGTAAGGGCCATGATGACTTGACGTCATCCCCACCTTCCTCCGGTTTATCACCGGCAGTCTCCTTTGAGTTCCCACCATTACGTGCTGGCAACAAAGGATAAGG…	717	Pseudomonadota	Gammaproteobacteria	Enterobacterales	Enterobacteriaceae	Rosenbergiella	0	1297	99.72	Rosenbergiella collisarenosi/Rosenbergiella epipactidis	Rosenbergiella	337
L1-3CT-W	OM164164	D13	Control/Healthy Silks	L	CO433	T	27F	8	0.00570613	TGCAGTCGAACGGTAACAGANAGTANCTTGCTACTTTGCTGACGAGTGGCGGACGGGTGAGTAATGTCTGGGGATCTGCCTGATGGAGGGGGATAACTACTGGAAACGGTAGCTAATACCGCATAATGTCGCAAGACCAAAGCGGGGGACTTTCGGGCCTCGCACCATCAGATGAACCCAGATGGGATTAGCTAGTANGTAAGGTAATGGCTTACCTAGGCGACGATCCCTAGCTGGTCTGAGAGGATGACCAGCCACACTGGAACTGAGACACGGTCCAGACTCCTACGGGAGGCAGCAGTGGGGAATATTGCACAATGGGCGCAAGCCTGATGCAGCCATGCCGCGTGTATGAAGAAGGCCTTCGGGTTGTAAAGTACTTTCAGTCAGGAGGAAGGG…	1402	Pseudomonadota	Gammaproteobacteria	Enterobacterales	Enterobacteriaceae	Rosenbergiella	Rosenbergiella epipactidis	2470	99.07	Rosenbergiella epipactidis	Rosenbergiella	333
L1-8CT-M100-Z	OM164166	D15	Control/Healthy Silks	L	CO325	T	799F	4	0.00567376	GACTTCACCCCAGTCATGAATCACAAAGTGGTAAACGCCCTCCCGAAGGTTAAGCTATCTACTTCTTTTGCAACCCACTCCCATGGTGTGACGGGCGGTGTGTACAAGGCCCGGGAACGTATTCACCGTAACATTCTGATTTACGATTACTAGCGATTCCGACTTCATGGAGTCGAGTTGCAGACTCCAATCCGGACTACGACGCACTTTATGAGGTCCGCTTGCTCTCGCGAGGTCGCTTCTCTTTGTATGCGCCATTGTAGCACGTGTGTAGCCCTACTCGTAAGGGCCATGATGACTTGACGTCATCCCCACCTTCCTCCGGTTTATCACCGGCAGTCTCCTTTGAGTTCCCACCATTACGTGCTGGCAACAAAGGATAAGGGTTGCGCTCGTTGC…	705	Pseudomonadota	Gammaproteobacteria	Enterobacterales	Enterobacteriaceae	Rosenbergiella	0	1282	99.29	Rosenbergiella collisarenosi/Rosenbergiella epipactidis	Rosenbergiella	334
L1-5CB-V.1	OM164167	D16	Control/Healthy Silks	L	CO431	B	799F	0	0	GACTTCACCCCAGTCATGAATCACAAAGTGGTAAGCGCCCTCCCGAAGGTTAAGCTACCTACTTCTTTTGCAACCCACTCCCATGGTGTGACGGGCGGTGTGTACAAGGCCCGGGAACGTATTCACCGTAGCATTCTGATCTACGATTACTAGCGATTCCGACTTCATGGAGTCGAGTTGCAGACTCCAATCCGGACTACGACATACTTTATGAGGTCCGCTTGCTCTCGCGAGGTCGCTTCTCTTTGTATATGCCATTGTAGCACGTGTGTAGCCCTGGTCGTAAGGGCCATGATGACTTGACGTCATCCCCACCTTCCTCCAGTTTATCACTGGCAGTCTCCTTTGAGTTCCCGGCCGGACCGCTGGCAACAAAGGATAAGGGTTGCGCTCGTTGCG…	691	Pseudomonadota	Gammaproteobacteria	Enterobacterales	Enterobacteriaceae	0	0	1253	99.56	Klebsiella quasipneumoniae	Klebsiella	141
L1-16CT-S	OM164168	D17	Control/Healthy Silks	L	CO462	T	799F	5	0.00749625	CACAAAGTGGTAAGCGCCCTCCCGAAGGTTAAGCTACCTACTTCTTTCGCAACCCACTCCCATGGTGTGACGGGCGGTGTGCACAAGGCCCGGGAACGTATTCACCGTAGCATTCTGATCTACGATTACTAGCGATTCCGACTTCATGGAGTCGAGTTGCAGACTCCAATCCGGACTACGACGCACTTTATGAGGTCCGCTTGCTCTCGCGAGGTCGCTTCTCTTTGTATGCGCCATTGTAGCACGTGTGTAGCCCTACTCGTAAGGGCCATGATGACTTGACGTCATCCCCACCTTCCTCCAGTTTATCACTGGCAGTCTCCTTTGAGTTCCCGGCCGGACCGCTGGCAACAAAGGATAAGGGTTGCGCTCGTTGCGGGACTTAACCCAACATTTCAC…	667	Pseudomonadota	Gammaproteobacteria	Enterobacterales	Enterobacteriaceae	0	0	1181	98.65	Enterobacter tabaci/ Cedecea davisae	Enterobacter	81
L1-6CT-S	OM164169	D18	Control/Healthy Silks	L	CO430	T	799F	1	0.0015456	TAGTTGTGGGGTCCATTCCACGGATTCCGTGACGCAGCTAACGCATTAAGTTCCCCGCCTGGGGAGTACGGCCGCAAGGCTAAAACTCAAAGGAATTGACGGGGACCCGCACAAGCGGCGGAGCATGCGGATTAATTCGATGCAACGCGAAGAACCTTACCAAGGCTTGACATATACGAGAACGGGCCAGAAATGGTCAACTCTTTGGACACTCGTAAACAGGTGGTGCATGGTTGTCGTCAGCTCGTGTCGTGAGATGTTGGGTTAAGTCCCGCAACGAGCGCAACCCTCGTTCTATGTTGCCAGCACGTAATGGTGGGAACTCATGGGATACTGCCGGGGTCAACTCGGAGGAAGGTGGGGATGACGTCAAATCATCATGCCCCTTATGTCTTGGGC…	647	Actinomycetota	Actinomycetia	Micrococcales	Microbacteriaceae	Microbacterium	0	1186	99.69	Microbacterium (many)*	Microbacterium	183
L1-13CT-W	OM241080	D19	Control/Healthy Silks	L	CO444	T	799F	6	0.00936037	GGTGTTACCGACTTTCATGACTTGACGGGCGGTGTGTACAAGACCCGGGAACGTATTCACCGCAGCGTTGCTGATCTGCGATTACTAGCGACTCCGACTTCATGAGGTCGAGTTGCAGACCTCAATCCGAACTGGGACCGGCTTTTTGGGATTCGCTCCACCTCGCGGTATTGCAGCCCTTTGTACCGGCCATTGTAGCATGCGTGAAGCCCAAGACATAAGGGGCATGATGATTTGACGTCATCCCCACCTTCCTCCGAGTTGACCCCGGCAGTATCCCATGAGTTCCCACCATTACGTGCTGGCAACATAGAACGAGGGTTGCGCTCGTTGCGGGACTTAACCCAACATCTCACGACACGAGCTGACGACAACCATGCACCACCTGTTTACGAGTGT…	641	Actinomycetota	Actinomycetia	Micrococcales	Microbacteriaceae	Microbacterium	0	1151	98.75	Microbacterium diaminobutyricum / many more Microbacterium species	Microbacterium	181
L1-16CT-U	OM164170	D20	Control/Healthy Silks	L	CO462	T	799F	9	0.0123796	ACCNNGNTANGATTTNNTCNTAATCACCGATCCCANNCTTCGACGGCTCCTTCCACAAGGGTTAGGCCACCGGCTTCGGGTGTTACCGACTTTCATGACTTGACGGGCGGTGTGTACAAGGCCCGGGAACGTATTCACCGCAGCGTTGCTGATCTGCGATTACTAGCGACTCCGACTTCATGAGGTCGAGTTGCAGACCTCAATCCGAACTGAGACCGGCTTTTTGGGATTCGCTCCACCTTACGGTATCGCAGCCCTTTGTACCGGCCATTGTAGCATGCGTGAAGCCCAAGACATAAGGGGCATGATGATTTGACGTCATCCCCACCTTCCTCCGAGTTGACCCCGGCAGTCTCCTATGAGTCCCCGGCATAACCCGCTGGCAACATAGAACGAGGG…	727	Actinomycetota	Actinomycetia	Micrococcales	Microbacteriaceae	Curtobacterium	Curtobacterium flaccumfaciens	1297	99.58	Curtobacterium flaccumfaciens	Curtobacterium	55
L1-6CT-U	OM164171	D21	Control/Healthy Silks	L	CO430	T	799F	1	0.00145985	ACCTTGTTACGACTTCACCCCAGTCGCTGACCCTACCGTGGTCGCCTGCCCCCTTGCGGTTAGCGCAGCGCCTTCGGGTAAAACCAACTCCCATGGTGTGACGGGCGGTGTGTACAAGGCCCGGGAACGTATTCACCGCAGCATGCTGATCTGCGATTACTAGCGATTCCAACTTCATGCACTCGAGTTGCAGAGTGCAATCCGAACTGAGATGGCTTTTGGAGATTAGCTCGACATCGCTGTCTCGCTGCCCACTGTCACCACCATTGTAGCACGTGTGTAGCCCAGCCCGTAAGGGCCATGAGGACTTGACGTCATCCCCACCTTCCTCTCGGCTTATCACCGGCAGTCCCCTTAGAGTGCCCAACTCANATGCTGGCAACTAAGGGCGAGGGTTGC…	685	Pseudomonadota	Alphaproteobacteria	Hyphomicrobiales	Rhizobiaceae	Agrobacterium	Agrobacterium larrymoorei	1251	99.56	Agrobacterium larrymoorei	Agrobacterium	393
L1-16CT-W	OM164172	D22	Control/Healthy Silks	L	CO462	T	799F	1	0.00137363	TTACCTTGTTACGACTTAGTCCTAATTACCGATCCCACCTTCGACGGCTCCCTCCACAAGGGTTAGGCCACCGGCTTCAGGTGTTACCGACTTTCATGACTTGACGGGCGGTGTGTACAAGACCCGGGAACGTATTCACCGCAGCGTTGCTGATCTGCGATTACTAGCGACTCCGACTTCATGAGGTCGAGTTGCAGACCTCAATCCGAACTGGGACCGGCTTTTTGGGATTCGCTCCACCTCACGGTATTGCAGCCCTTTGTACCGGCCATTGTAGCATGCGTGAAGCCCAAGACATAAGGGGCATGATGATTTGACGTCATCCCCACCTTCCTCCGAGTTGACCCCGGCAGTATCCCATGAGTTCCCACCATTACGTGCTGGCAACATAGAACGAGG…	728	Actinomycetota	Actinomycetia	Micrococcales	Microbacteriaceae	Microbacterium	Microbacterium proteolyticum	1330	99.59	Microbacterium proteolyticum	Microbacterium	179&180
L1-13CT-V	OM164173	D23	Control/Healthy Silks	L	CO444	T	799F	3	0.00471698	CAAGGGGNTTAGGCCACTGGCTTCGGGTGTTACCGACTTTCACGACTTGACGNGGCGGTGTGTACAAGGCCCGGGAACGTATTCACCGCAGCGTTGCTGATCTGCGATTACTAGCGACTCCGACTTCATGAGGTCGAGTTGCAGACCTCAATCCGAACTGAGACCGGCTTTTTGGGATTCGCTCCACCCTACGGTATCGCAGCCCTTTGTACCGGCCATTGTAGCATGCGTGAAGCCCAAGACATAAGGGGCATGATGATTTGACGTCATCCCCACCTTCCTCCGAGTTGACCCCGGCAGTCTCCTATGAGTTCCCACCATAACGTGCTGGCAACATAGAACGAGGGTTGCGCTCGTTGCGGGACTTAACCCAACATCTCACGACACGAGCTGACGACA…	636	Actinomycetota	Actinomycetia	Micrococcales	Microbacteriaceae	0	0	1125	98.58	Frigoribacterium faeni/ Frigoribacterium endophyticum	Frigoribacterium	110
L1-13CT-T	OM164174	D24	Control/Healthy Silks	L	CO444	T	799F	3	0.00413793	TACNTTNNTTACGACTTCACCCCAGTCATGAATCACAAAGTGGTAAACGCCCTCCCGAAGGTTAAGCTATCTACTTCTTTTGCAACCCACTCCCATGGTGTGACGGGCGGTGTGTACAAGGCCCGGGAACGTATTCACCGTAACATTCTGATTTACGATTACTAGCGATTCCGACTTCATGGAGTCGAGTTGCAGACTCCAATCCGGACTACGACGCACTTTATGAGGTCCGCTTGCTCTCGCGAGGTCGCTTCTCTTTGTATGCGCCATTGTAGCACGTGTGTAGCCCTACTCGTAAGGGCCATGATGACTTGACGTCATCCCCACCTTCCTCCGGTTTATCACCGGCAGTCTCCTTTGAGTTCCCACCATTACGTGCTGGCAACAAAGGATAAGGGT…	725	Pseudomonadota	Gammaproteobacteria	Enterobacterales	Enterobacteriaceae	Rosenbergiella	0	1319	100	Rosenbergiella collisarenosi/Rosenbergiella epipactidis	Rosenbergiella	337
L1-16CB-Q	OM164175	F01	Control/Healthy Silks	L	CO462	B	799F	2	0.00274725	TACCTNGTTACGACTTCACCCCAGTCGCTGAACCCACCGTGGTCGCCTGCTTCCCTTACGGGTTGGCGCAACGCCTTCGGGTGAATCCAACTCCCATGGTGTGACGGGCGGTGTGTACAAGGCCTGGGAACGTATTCACCGCGGCATGCTGATCCGCGATTACTAGCGATTCCGCCTTCATGCTCTCGAGTTGCAGAGAACAATCCGAACTGAGACAACTTTTGGGGATTAGCTCGCCCTCGCAGGGTCGCTGCCCACTGTAGTTGCCATTGTAGCACGTGTGTAGCCCAGCGCGTAAGGGCCATGAGGACTTGACGTCATCCCCACCTTCCTCCGGCTTATCACCGGCGGTTCCTTTAGAGTACCCAACCAAATGATGGTAACTAAAGGCGAGGGTTG…	728	Pseudomonadota	Alphaproteobacteria	Sphingomonadales	Sphingomonadaceae	Sphingomonas	0	1301	98.9	Sphingomonas yabuuchiae	Sphingomonas	363
L1-12CB-V	OM164176	F03	Control/Healthy Silks	L	CO448	B	799F	1	0.00140056	TACCTTGTTACGACTTAGCCCTAGTTACCTGTTTTACCCTAGGCAGCTCCTGTTACGGTCACCGACTTCAGGTACCCCAGACTTCCATGGCTTGACGGGCGGTGTGTACAAGGCCCGGGAACGTATTCACCGCGCCATGGCTGATGCGCGATTACTAGCGATTCCAGCTTCATAGAGTCGAGTTGCAGACTCCAATCCGAACTGAGACCGGCTTTCGAGATTTGCATCACATCGCTGTGTAGCTGCCCTCTGTACCGGCCATTGTATTACGTGTGTGGCCCAAGACGTAAGGGCCGTGATGATTTGACGTCATCCCCACCTTCCTCTCTACTTGCGTAGGCAGTCTCACTAGAGTCCTCAACTGAATGTTAGCAACTAGTGACAGGGGTTGCGCTCGTT…	714	Bacteroidota	Flavobacteriia	Flavobacteriales	Weeksellaceae	Chryseobacterium	0	1251	98.88	Chyrseobacterium hominis	Chryseobacterium	51
L1-16CB-Z	OM164177	F04	Control/Healthy Silks	L	CO462	B	799F	0	0	TTACGACTTCACCCCAGTCGCTGACCCTACCGTGGTCGCCTGCCCCCTTGCGGTTAGCGCAGCGCCTTCGGGTAAAACCAACTCCCATGGTGTGACGGGCGGTGTGTACAAGGCCCGGGAACGTATTCACCGCAGCATGCTGATCTGCGATTACTAGCGATTCCAACTTCATGCACTCGAGTTGCAGAGTGCAATCCGAACTGAGATGGCTTTTGGAGATTAGCTCGACATCGCTGTCTCGCTGCCCACTGTCACCACCATTGTAGCACGTGTGTAGCCCAGCCCGTAAGGGCCATGAGGACTTGACGTCATCCCCACCTTCCTCTCGGCTTATCACCGGCAGTCCCCTTAGAGTGCCCAACT-GAATGCTGGCAACTAAGGGCGAGGGTTGCGCTCGT…	713	Pseudomonadota	Alphaproteobacteria	Hyphomicrobiales	Rhizobiaceae	Agrobacterium	Agrobacterium larrymoorei	1301	99.58	Agrobacterium larrymoorei	Agrobacterium	13
L1-18CB-Z	OM164178	F05	Control/Healthy Silks	L	P38157	B	799F	1	0.00141643	TACCTTNGTTACGACTTCACCCCAATCATCTACCCCACCTTCGACGGCTGGCTCCTTGCGGTTACCTCACCGGCTTCGGGTGTTGCAAACTCTCGTGGTGTGACGGGCGGTGTGTACAAGACCCGGGAACGTATTCACCGCAGTATGCTGACCTGCGATTACTAGCGATTCCGACTTCATGCAGGCGAGTTGCAGCCTGCAATCCGAACTGGGAACGGCTTTATGGGATTGGCTCCACCTCGCGGTCTCGCTGCCCTTTGTACCGTCCATTGTAGCACGTGTGTAGCCCAACTCATAAGGGGCATGATGATTTGACGTCATCCCCACCTTCCTCCGGTTTGTCACCGGCAGTCTCCCTAGAGTGCCCAACTGAATGCTGGCAACTAAGGATAGGGGTTG…	706	Bacillota	Bacilli	Bacillales	Bacillaceae	Exiguobacterium	0	1286	99.58	Exiguobacterium acetylicum	Exiguobacterium	102
L1-12CB-T	OM164179	F06	Control/Healthy Silks	L	CO448	B	799F	12	0.0165975	GTTACGACTTCACCCCAGTCACGAACCCCGCCGTGGTAAGCGCCCTCCTTGCGGTTAGGCTACCTACTTCTGGCGAGACCCGCTCCCATGGTGTGACGGGCGGTGTGTACAAGACCCGGGAACGTATTCACCGCGGCATGCTGATCCGCAATTACTAGCGATTCCAACTTCACGCAGTCGAGTTGCAGACTGCGATCCGGACTACGACTGGTTTTATGGGATTAGCTCCCCCTCGCGGGTTGGCAACCCTCTGTACCAGCCATTGTATGACGTGTGTAGCCCCACCTATAAGGGCCATGAGGACTTGACGTCATCCCCACCTTCCTCCGGTTTGTCACCGGCAGTCTCATTAGAGTGCCCAACTAAATGTAGCAACTAATGACAAGGGTTGCGCTCGTT…	723	Pseudomonadota	Betaproteobacteria	Burkholderiales	Comamonadaceae	Delftia	0	1219	97.23	Delftia acidovorans	Delftia	68
P1-12CB-Z	OM164189	G01	Control/Healthy Silks	P	CO448	B	799F	1	0.00142045	TTACNTTGTTACGACTTCACCCCAGTCGCTGAACCCACCGTGGTCGCCTGCTTCCCTTACGGGTTGGCGCAACGCCTTCGGGTGAATCCAACTCCCATGGTGTGACGGGCGGTGTGTACAAGGCCTGGGAACGTATTCACCGCGGCATGCTGATCCGCGATTACTAGCGATTCCGCCTTCATGCTCTCGAGTTGCAGAGAACAATCCGAACTGAGACAACTTTTGGGGATTAGCTCGCCCTCGCAGGGTCGCTGCCCACTGTAGTTGCCATTGTAGCACGTGTGTAGCCCAGCGCGTAAGGGCCATGAGGACTTGACGTCATCCCCACCTTCCTCCGGCTTATCACCGGCGGTTCCTTTAGAGTACCCAACCAAATGATGGTAACTAAAGGCGAGGGTT…	704	Pseudomonadota	Alphaproteobacteria	Sphingomonadales	Sphingomonadaceae	Sphingomonas	Sphingomonas yabuuchiae	1264	99.01	Sphingomonas yabuuchiae	Sphingomonas	363
P1-13CB-S1-Z	OM164190	G02	Control/Healthy Silks	P	CO444	B	799F	2	0.00275103	GGTTACCCTTNNTTACGACTTAGTCCTAATTACCGATCCCACCTTCGACGGCTCCCTCCAAAAGGTTAGGCCACCGGCTTCGGGTGTTACCGACTTTCATGACTTGACGGGCGGTGTGTACAAGGCCCGGGAACGTATTCACCGCAGCGTTGCTGATCTGCGATTACTAGCGACTCCGACTTCATGGGGTCGAGTTGCAGACCCCAATCCGAACTGAGACTGGCTTTTTGGGATTCGCTCCACCTCGCGGTATTGCAGCCCATTGTACCAGCCATTGTAGCATGCGTGAAGCCCAAGACATAAGGGGCATGATGATTTGACGTCATCCCCACCTTCCTCCGAGTTGACCCCGGCAGTCTCATATGAGTTCCCACCATTACGTGCTGGCAACATACGACG…	727	Actinomycetota	Actinomycetia	Micrococcales	Microbacteriaceae	Pseudoclavibacter	0	1315	99.86	Pseudoclavibacter helvolus	Pseudoclavibacter	305
L1-16CT-V	OM164191	G03	Control/Healthy Silks	L	CO462	T	799F	1	0.00141844	TACCTTNGTTACGACTTAGCCCTAGTTACCTGTTTTACCCTAGGCAGCTCCTGTTACGGTCACCGACTTCAGGTACCCCAGACTTCCATGGCTTGACGGGCGGTGTGTACAAGGCCCGGGAACGTATTCACCGCGCCATGGCTGATGCGCGATTACTAGCGATTCCAGCTTCATAGAGTCGAGTTGCAGACTCCAATCCGAACTGAGACCGGCTTTCGAGATTTGCATCACATCGCTGTGTAGCTGCCCTCTGTACCGGCCATTGTATTACGTGTGTGGCCCAAGACGTAAGGGCCGTGATGATTTGACGTCATCCCCACCTTCCTCTCTACTTGCGTAGGCAGTCTCACTAGAGTCCTCAACTGAATGTTAGCAACTAGTGACAGGGGTTGCGCTCGT…	705	Bacteroidota	Flavobacteriia	Flavobacteriales	Weeksellaceae	Chryseobacterium	0	1231	98.87	Chryseobacterium hominis	Chryseobacterium	51
L1-18CB-R	OM164193	G06	Control/Healthy Silks	L	P38157	B	799F	3	0.00425532	ACTTCACCCCAGTCACGAACCCCGCCGTGGTAAGCGCCCTCCTTGCGGTTAGGCTACCTACTTCTGGCGAGACCCGCTCCCATGGTGTGACGGGCGGTGTGTACAAGACCCGGGAACGTATTCACCGCGGCATGCTGATCCGCGATTACTAGCGATTCCGACTTCACGCAGTCGAGTTGCAGACTGCGATCCGGACTACGACTGGTTTTATGGGATTAGCTCCCCCTCGCGGGTTGGCAACCCTCTGTACCAGCCATTGTATGACGTGTGTAGCCCCACCTATAAGGGCCATGAGGACTTGACGTCATCCCCACCTTCCTCCGGTTTGTCACCGGCAGTCTCATTAGAGTGCCCAACTAAATGTAGCAACTAATGACAAGGGTTGCGCTCGTTGCGGGA…	705	Pseudomonadota	Betaproteobacteria	Burkholderiales	Comamonadaceae	Delftia	Delftia acidovorans	1234	99.29	Delftia acidovorans	Delftia	61
P1-8CT-P1/100-Z	OM164194	G07	Control/Healthy Silks	P	CO325	T	799F	3	0.00426743	GACTTCACCCCAGTCATGAATCACAAAGTGGTAAGCGCCCTCCCGAAGGTTAAGCTACCTACTTCTTTTGCAACCCACTCCCATGGTGTGACGGGCGGTGTGTACAAGGCCCGGGAACGTATTCACCGTGACATTCTGATTCACGATTACTAGCGATTCCGACTTCATGGAGTCGAGTTGCAGACTCCAATCCGGACTACGACGCACTTTATGAGGTCCGCTTGCTCTCGCGAGATTGCTTCTCTTTGTATGCGCCATTGTAGCACGTGTGTAGCCCTGGTCGTAAGGGCCATGATGACTTGACGTCATCCCCACCTTCCTCCAGTTTATCACTGGCAGTCTCCTTTGAGTTCCCGGCCTGACCGCTGGCAACAAAGGATAAGGGTTGCGCTCGTTGCG…	703	Pseudomonadota	Gammaproteobacteria	Enterobacterales	Enterobacteriaceae	0	0	1222	98.58	Atlantibacter hermannii	Atlantibacter	403&22
L1-12CB-Z	OM262843	G12	Control/Healthy Silks	L	CO448	B	799F	0	0	TACGACTTCACCCCAGTCATGAATCACAAAGTGGTAAGCGCCCTCCCGAAGGTTAAGCTACCTACTTCTTTTGCAACCCACTCCCATGGTGTGACGGGCGGTGTGTACAAGGCCCGGGAACGTATTCACCGTAGCATTCTGATCTACGATTACTAGCGATTCCGACTTCATGGAGTCGAGTTGCAGACTCCAATCCGGACTACGACGCACTTTATGAGGTCCGCTTGCTCTCGCGAGGTCGCTTCTCTTTGTATGCGCCATTGTAGCACGTGTGTAGCCCTACTCGTAAGGGCCATGATGACTTGACGTCATCCCCACCTTCCTCCAGTTTATCACTGGCAGTCTCCTTTGAGTTCCCGGCCGAACCGCTGGCAACAAAGGATAAGGGTTGCGCTCGTT…	702	Pseudomonadota	Gammaproteobacteria	Enterobacterales	Enterobacteriaceae	0	0	1267	100	Enterobacter tabaci/Cedecea davisae, same sequence*	Enterobacter/Cedecea*	84
L1-18CB-W	OM164199	G14	Control/Healthy Silks	L	P38157	B	799F	0	0	GACTTCACCCCAGTCATCGGCCACACCGTGGCAAGCGCCCTCCCGAAGGTTAAGCTACCTGCTTCTGGTGCAACAAACTCCCATGGTGTGACGGGCGGTGTGTACAAGGCCCGGGAACGTATTCACCGCAGCAATGCTGATCTGCGATTACTAGCGATTCCGACTTCATGGAGTCGAGTTGCAGACTCCAATCCGGACTGAGATAGGGTTTCTGGGATTGGCTTACCGTCGCCGGCTTGCAGCCCTCTGTCCCTACCATTGTAGTACGTGTGTAGCCCTGGCCGTAAGGGCCATGATGACTTGACGTCATCCCCACCTTCCTCCGGTTTGTCACCGGCGGTCTCCTTAGAGTTCCCACCATTACGTGCTGGCAACTAAGGACAAGGGTTGCGCTCGTTG…	705	Pseudomonadota	Gammaproteobacteria	Xanthomonadales	Xanthomonadaceae	Stenotrophomonas	0	1269	99.86	Stenotrophomonas pavanii/Stenotrophomonas humi/Stenotrophomonas maltophilia*	Stenotrophomonas	372&373&374&375
L1-18CB-P	OM241051	G16	Control/Healthy Silks	L	P38157	B	799F	0	0	CACGCCCTAAACGATGCGAACTGGATGTTGGGTGCAATTTGGCACGCAGTATCGAAGCTAACGCGTTAAGTTCGCCGCCTGGGGAGTACGGTCGCAAGACTGAAACTCAAAGGAATTGACGGGGGCCCGCACAAGCGGTGGAGTATGTGGTTTAATTCGATGCAACGCGAAGAACCTTACCTGGTCTTGACATGTCGAGAACTTTCCAGAGATGGATTGGTGCCTTCGGGAACTCGAACACAGGTGCTGCATGGCTGTCGTCAGCTCGTGTCGTGAGATGTTGGGTTAAGTCCCGCAACGAGCGCAACCCTTGTCCTTAGTTGCCAGCACGTAATGGTGGGAACTCTAAGGAGACCGCCGGTGACAAACCGGAGGAAGGTGGGGATGACGTCAAGTCAT…	664	Pseudomonadota	Gammaproteobacteria	Xanthomonadales	Xanthomonadaceae	Stenotrophomonas	Stenotrophomonas rhizophilia	1193	100	Stenotrophomonas rhizophilia	Stenotrophomonas	378
L1-16CB-W	OM262840	G18	Control/Healthy Silks	L	CO462	B	799F	1	0.00140449	GTTACGACTTCGTCCCAATCGCCGATCCCACCTTCGACGGCTCCCTCCCACAAGGGGTTAAGCCACCGGCTTCGGGTGTTACCGACTTTCATGACGTGACGGGCGGTGTGTACAAGGCCCGGGAACGTATTCACCGCAGCGTTGCTGATCTGCGATTACTAGCGACTCCGACTTCACGGGGTCGAGTTGCAGACCCCGATCCGAACTGAGACCAGCTTTAAGGGATTCGCTCCACCTCACGGTCTCGCAGCCCTCTGTACTGGCCATTGTAGCATGTGTGAAGCCCTGGACATAAGGGGCATGATGACTTGACGTCGTCCCCACCTTCCTCCGAGTTGACCCCGGCAGTCTCTTACGAGTCCCCACCATAACGTGCTGGCAACATAAGATAGGGGTTGC…	712	Actinomycetota	Actinomycetia	Mycobacteriales	Nocardioidaceae	0	0	1277	99.86	Nocardia coeliaca/Rhodococcus qingshengii etc.*	Nocardia/Rhodococcus*	193
L1-12CB-U	OM164202	G19	Control/Healthy Silks	L	CO448	B	799F	0	0	GTACGACTTCACCCCAGTCATGAATCACACCGTGGTAACCGTCCTCCCGAAGGTTAGACTAGCTACTTCTGGTGCAACCCACTCCCATGGTGTGACGGGCGGTGTGTACAAGGCCCGGGAACGTATTCACCGCGACATTCTGATTCGCGATTACTAGCGATTCCGACTTCACGCAGTCGAGTTGCAGACTGCGATCCGGACTACGATCGGTTTTATGGGATTAGCTCCACCTCGCGGCTTGGCAACCCTCTGTACCGACCATTGTAGCACGTGTGTAGCCCAGGCCGTAAGGGCCATGATGACTTGACGTCATCCCCACCTTCCTCCGGTTTGTCACCGGCAGTCTCCTTAGAGTGCCCACCATTACGTGCTGGTAACTAAGGACAAGGGTTGCGCTCG…	696	Pseudomonadota	Gammaproteobacteria	Pseudomonadales	Pseudomonadaceae	Pseudomonas	Pseudomonas tolaasii	1250	99.86	Pseudomonas tolaasii	Pseudomonas	323
L1-16CB-R	OM164205	G23	Control/Healthy Silks	L	CO462	B	27F	1	0.000712758	TGCAGTCGAGCGGGGGNAAGTACTTCGGTACTGACCTTAGCGGCGGACGGGTGAGTAATACTTAGGAATCTGCCTATTAGTGGGGGACAACATCTCGAAAGGGATGCTAATACCGCATACGTCCTACGGGAGAAAGCAGGGGATCTTTATGACCTTGCGCTAATAGATGAGCCTAAGTCGGATTAGCTAGTTGGTGGGGTAAAGGCCTACCAAGGCGACGATCTGTAGCGGGTCTGAGAGGATGATCCGCCACACTGGGACTGAGACACGGCCCAGACTCCTACGGGAGGCAGCAGTGGGGAATATTGGACAATGGGGGGAACCCTGATCCAGCCATGCCGCGTGTGTGAAGAAGGCCTTATGGTTGTAAAGCACTTTAAGCGAGGAGGAGGCTTACCT…	1403	Pseudomonadota	Gammaproteobacteria	Pseudomonadales	Moraxellaceae	Acinetobacter	Acinetobacter baylyi	2504	99.71	Acinetobacter baylyi	Acinetobacter	2
P1-8CT-P10-Z	OM241023	H01	Control/Healthy Silks	P	CO325	T	799F	0	0	TAACAGGATTAGATACCCTGGTAGTCCACGCCGTAAACGATGATAACTAGCTGTCCGGGCACTTGGTGCTTGGGTGGCGCAGCTAACGCATTAAGTTATCCGCCTGGGGAGTACGGCCGCAAGGTTAAAACTCAAAGGAATTGACGGGGGCCTGCACAAGCGGTGGAGCATGTGGTTTAATTCGAAGCAACGCGCAGAACCTTACCAGCGTTTGACATGTCCGGACGATTTCCAGAGATGGATCTCTTCCCTTCGGGGACTGGAACACAGGTGCTGCATGGCTGTCGTCAGCTCGTGTCGTGAGATGTTGGGTTAAGTCCCGCAACGAGCGCAACCCTCGCCTTTAGTTACCATCATTTGGTTGGGTACTCTAAAGGAACCGCCGGTGATAAGCCGGAG…	689	Pseudomonadota	Alphaproteobacteria	Sphingomonadales	Sphingomonadaceae	Sphingomonas	Sphingomonas sanguinis	1237	99.85	Sphingomonas sanguinis	Sphingomonas	358&359&360
P1-8CT-P10-Y	OM164207	H02	Control/Healthy Silks	P	CO325	T	799F	2	0.00307692	TCCACAAGGGTTAGGCCACCGGCTTCAGGTGTTACCGACTTTCATGACTTGACGGGCGGTGTNGTACAAGACCCGGGAACGTATTCACCGCAGCGTTGCTGATCTGCGATTACTAGCGACTCCGACTTCATGAGGTCGAGTTGCAGACCTCAATCCGAACTGGGACCGGCTTTTTGGGATTCGCTCCACCTCACGGTATCGCAGCCCTTTGTACCGGCCATTGTAGCATGCGTGAAGCCCAAGACATAAGGGGCATGATGATTTGACGTCATCCCCACCTTCCTCCGAGTTGACCCCGGCAGTATCCCATGAGTTCCCACCATTACGTGCTGGCAACATAGAACGAGGGTTGCGCTCGTTGCGGGACTTAACCCAACATCTCACGACACGAGCTGACGA…	650	Actinomycetota	Actinomycetia	Micrococcales	Microbacteriaceae	Microbacterium	Microbacterium testaceum	1152	99.38	Microbacterium testaceum	Microbacterium	175
P1-8CT-P10-X	OM164208	H03	Control/Healthy Silks	P	CO325	T	799F	5	0.00792393	GTTNTGGGGANATTCCACGGTTTCCGTGACGCAGCTAACGCATTAAGTTCCCCGCCTGGGGAGTACGGCCGCAAGGCTAAAACTCAAAGGAATTGACGGGGACCCGCACAAGCGGCGGAGCATGCGGATTAATTCGATGCAACGCGAAGAACCTTACCAAGGCTTGACATATACGAGAACGGGCCAGAAATGGTCAACTCTTTGGACACTCGTAAACAGGTGGTGCATGGTTGTCGTCAGCTCGTGTCGTGAGATGTTGGGTTAAGTCCCGCAACGAGCGCAACCCTCGTTCTATGTTGCCAGCACGTAATGGTGGGAACTCATGGGATACTGCCGGGGTCAACTCGAAGGAAGGTGGGGATGACGTCAAATCATCATGCCCCTTATGTCTTGGGCTTC…	631	Actinomycetota	Actinomycetia	Micrococcales	Microbacteriaceae	Microbacterium	0	1102	98.73	Microbacterium testaceum	Microbacterium	173
P1-6CT-X	OM164209	H04	Control/Healthy Silks	P	CO430	T	799F	2	0.00284091	TTCACCCCAGTCATGAATCACAAAGTGGTAAGCGCCCTCCCGAAGGTTAAGCTACCTACTTCTTTTGCAACCCACTCCCATGGTGTGACGGGCGGTGTGTACAAGGCCCGGGAACGTATTCACCGTGGCATTCTGATCCACGATTACTAGCGATTCCGACTTCACGGAGTCGAGTTGCAGACTCCGATCCGGACTACGACGCACTTTATGAGGTCCGCTTGCTCTCGCGAGGTCGCTTCTCTTTGTATGCGCCATTGTAGCACGTGTGTAGCCCTACTCGTAAGGGCCATGATGACTTGACGTCATCCCCACCTTCCTCCGGTTTATCACCGGCAGTCTCCTTTGAGTTCCCGACCGAATCGCTGGCAACAAAGGATAAGGGTTGCGCTCGTTGCGGGA…	704	Pseudomonadota	Gammaproteobacteria	Enterobacterales	Erwiniaceae	0	0	1215	98.44	Pantoea anthophila/Pantoea ananatis*	Pantoea	278
P1-6CT-Y	OM164210	H05	Control/Healthy Silks	P	CO430	T	799F	1	0.00146199	TTCACCCCAGTCATGAATCACTCCGTGGTAACCGTCCTCCCGAAGGTTAGACTAGCTACTTCTGGAGCAACCCACTCCCATGGTGTGACGGGCGGTGTGTACAAGGCCCGGGAACGTATTCACCGTGACGTTCTGATTCACGATTACTAGCGATTCCGACTTCACGCAGTCGAGTTGCAGACTGCGATCCGGACTACGATCGGTTTTATGGGATTAGCTCCACCTCGCGGCTTGGCAACCCTTTGTACCGACCATTGTAGCACGTGTGTAGCCCTGGCCGTAAGGGCCATGATGACTTGACGTCATCCCCACCTTCCTCCGGTTTGTCACCGGCAGTCTCCTTAGAGTGCCCACCATAACGTGCTGGTAACTAAGGACAAGGGTTGCGCTCGTTACGGG…	684	Pseudomonadota	Gammaproteobacteria	Pseudomonadales	Pseudomonadaceae	Pseudomonas	0	1225	99.71	Pseudomonas oryzihabitans/Pseudomonas psychrotolerans*	Pseudomonas	309
P1-5CB-X	OM302483	H06	Control/Healthy Silks	P	CO431	B	799F	7	0.0110063	two shorter sequences: TTCCTTGAGGAGTGGCTTCCGGAGCTAACGCGTTAAGTCGACCGCCTGGGGAGTACGGCCGCAAGGTTAAAACTCAAATGAATTGACGGGGGCCCGCACAAGCGGTGGAGCATGTGGTTTAATTCGATGCAACGCGAAGAACCTTACCTACTCTTGACATCCAGAGAACTTAGCAGAGATGCTTTGGTGCCTTCGGGAACTCTGAGACAGGTGCTGCATGGCTGTCGTCAGCTCGTGTTGTGAAATGTTGGGTTAAGTCCCNCTTCCAGCGCNACCCTTATCCNTTGTTGC / GCGCCCTCNNGAAGGTTAAGCTACCTACTTCTTTTGCAACCCACTCCCATGGTGTGACGGGCGGTGTGTACAAGGCCCGGGA…	291&345	unassigned	unassigned	unassigned	unassigned	0	0	498/600	97.92/98.26	Raoultella electrica/Raoultella planticola/Pantoea anthophila etc etc*/Flavobacterium acidificum/Pantoea ananatis*	Raoultella/Pantoea/Flavobacterium/Pragia*	400
P1-8CT-P1-X	OM164211	H07	Control/Healthy Silks	P	CO325	T	799F	2	0.00285714	TTCACCCCAGTCGCTGAACCCACCGTGGTCGCNTGCTTCCCTTACGGGTTGGCGCAACGCCTTCGGGTGAATCCAACTCCCATGGTGTGACGGGCGGTGTGTACAAGGCCTGGGAACGTATTCACCGCGGCATGCTGATCCGCGATTACTAGCGATTCCGCCTTCATGCTCTCGAGTTGCAGAGAACAATCCGAACTGAGACAACTTTTGGGGATTAGCTCGCCCTCGCAGGGTCGCTGCCCACTGTAGTTGCCATTGTAGCACGTGTGTAGCCCAGCGCGTAAGGGCCATGAGGACTTGACGTCATCCCCACCTTCCTCCGGCTTATCACCGGCGGTTCCTTTAGAGTACCCAACCAAATGATGGTAACTAAAGGCGAGGGTTGCGCTCGTTGCGGGA…	700	Pseudomonadota	Alphaproteobacteria	Sphingomonadales	Sphingomonadaceae	Sphingomonas	0	1213	98.57	Sphingomonas yabuuchiae	Sphingomonas	352
L1-16CB-Y	OM164212	H08 AKA F02	Control/Healthy Silks	L	CO462	B	799F	0	0	CGACTTAGTCCTAATTACCGATCCCACCTTCGACGGCTCCCTCCAAAAGGTTAGGCCACCGGCTTCGGGTGTTACCGACTTTCATGACTTGACGGGCGGTGTGTACAAGGCCCGGGAACGTATTCACCGCAGCGTTGCTGATCTGCGATTACTAGCGACTCCGACTTCATGGGGTCGAGTTGCAGACCCCAATCCGAACTGAGACTGGCTTTTTGGGATTCGCTCCACCTCGCGGTATTGCAGCCCATTGTACCAGCCATTGTAGCATGCGTGAAGCCCAAGACATAAGGGGCATGATGATTTGACGTCATCCCCACCTTCCTCCGAGTTGACCCCGGCAGTCTCATATGAGTTCCCACCATTACGTGCTGGCAACATACGACGAGGGTTGCGCTCGTT…	715	Actinomycetota	Actinomycetia	Micrococcales	Microbacteriaceae	Pseudoclavibacter	0	1286	99.86	Pseudoclavibacter helvolus	Pseudoclavibacter	305
P1-8CT-P1-Z	OM164213	H09	Control/Healthy Silks	P	CO325	T	799F	1	0.00147275	CTCCTTCCNCAAGGGTTAGGCCACCGGCTTCGGGTGTTACCGACTTTCATGACTTGACGGGCGGTGTGTACAAGGCCCGGGAACGTATTCACCGCAGCGTTGCTGATCTGCGATTACTAGCGACTCCGACTTCATGAGGTCGAGTTGCAGACCTCAATCCGAACTGAGACCGGCTTTTTGGGATTCGCTCCACCTTACGGTATCGCAGCCCTTTGTACCGGCCATTGTAGCATGCGTGAAGCCCAAGACATAAGGGGCATGATGATTTGACGTCATCCCCACCTTCCTCCGAGTTGACCCCGGCAGTCTCCTATGAGTCCCCGCCATAACGCGCTGGCAACATAGAACGAGGGTTGCGCTCGTTGCGGGACTTAACCCAACATCTCACGACACGAGCTG…	679	Actinomycetota	Actinomycetia	Micrococcales	Microbacteriaceae	Curtobacterium	0	1222	99.85	Curtobacterium oceanosedimentum/Curtobacterium luteum*	Curtobacterium	58
P1-8CT-G1-Y	OM164214	H10	Control/Healthy Silks	P	CO325	T	799F	0	0	GGTGCATTTGGCACGCAGTATCGAAGCTAACGCGTTAAGTTCGCCGCCTGGGGAGTACGGTCGCAAGACTGAAACTCAAAGGAATTGACGGGGGCCCGCACAAGCGGTGGAGTATGTGGTTTAATTCGATGCAACGCGAAGAACCTTACCTGGCCTTGACATGTCGAGAACTTTCCAGAGATGGATCGGTGCCTTCGGGAACTCGAACACAGGTGCTGCATGGCTGTCGTCAGCTCGTGTCGTGAGATGTTGGGTTAAGTCCCGCAACGAGCGCAACCCTTGTCCTTAGTTGCCAGCACGTAATGGTGGGAACTCTAAGGAGACCGCCGGTGACAAACCGGAGGAAGGTGGGGATGACGTCAAGTCATCATGGCCCTTACGGCCAGGGCTACACACGTA…	632	Pseudomonadota	Gammaproteobacteria	Xanthomonadales	Xanthomonadaceae	Stenotrophomonas	0	1128	99.68	Stenotrophomonas pavanii/Stenotrophomonas tumulicola/Stenotrophomonas maltophilia,etc.*	Stenotrophomonas	371&372&373&374&375
P1-16CB-W	OM164215	H11	Control/Healthy Silks	P	CO462	B	799F	1	0.00152905	GCAGCGCCCTCCCGAAGGTTAAGCTACCTGCTTCTGGTGCAACAAACTCCCATGGTGTGACGGGCGGTGTGTACAAGGCCCGGGAACGTATTCACCGCAGCAATGCTGATCTGCGATTACTAGCGATTCCGACTTCATGGAGTCGAGTTGCAGACTCCAATCCGGACTGAGATGGGGTTTCTGGGATTGGCTTACCGTCGCCGGCTTGCAGCCCTCTGTCCCCACCATTGTAGTACGTGTGTAGCCCTGGCCGTAAGGGCCATGATGACTTGACGTCATCCCCACCTTCCTCCGGTTTGTCACCGGCGGTCTCCTTAGAGTTCCCACCATTACGTGCTGGCAACTAAGGACAAGGGTTGCGCTCGTTGCGGGACTTAACCCAACATCTCACGACACGAG…	654	Pseudomonadota	Gammaproteobacteria	Xanthomonadales	Xanthomonadaceae	Stenotrophomonas	0	1164	99.54	Stenotrophomonas maltophilia/Stenotrophomonas pavanii/Stenotrophomonas humi*	Stenotrophomonas	379&380
L1-16CB-V	OM164216	H12	Control/Healthy Silks	L	CO462	B	799F	0	0	GTTGTGGGGTCATTCCACGGATTCCGTGACGCAGCTAACGCATTAAGTTCCCCGCCTGGGGAGTACGGCCGCAAGGCTAAAACTCAAAGGAATTGACGGGGACCCGCACAAGCGGCGGAGCATGCGGATTAATTCGATGCAACGCGAAGAACCTTACCAAGGCTTGACATATACGAGAACGGGCCAGAAATGGTCAACTCTTTGGACACTCGTAAACAGGTGGTGCATGGTTGTCGTCAGCTCGCGTCGTGAGATGTTGGGTTAAGTCCCGCAACGAGCGCAACCCTCGTTCTATGTTGCCAGCACGTAATGGTGGGAACTCATGGGATACTGCCGGGGTCAACTCGGAGGAAGGTGGGGATGACGTCAAATCATCATGCCCCTTATGTCTTGGGCTTC…	627	Actinomycetota	Actinomycetia	Micrococcales	Microbacteriaceae	Microbacterium	0	1117	99.68	Microbacterium oleivorans/Microbacterium schleiferi/Microbacterium koreense*	Microbacterium	176
L1-16CB-P	OM164217	H13	Control/Healthy Silks	L	CO462	B	799F	3	0.00423729	TTGTTACGACTTCACCCCANTCNTCTGTCCCACCTTAGGCGGCTGGCTCCAAAAGGTTACCCCACCGACTTCGGGTGTTACAAACTCTCGTGGTGTGACGGGCGGTGTGTACAAGGCCCGGGAACGTATTCACCGCGGCATGCTGATCCGCGATTACTAGCGATTCCGGCTTCATGTAGGCGAGTTGCAGCCTACAATCCGAACTGAGAACGGTTTTATGGGATTGGCTCGACCTCGCGGTTTTGCTGCCCTTTGTACCGTCCATTGTAGCACGTGTGTAGCCCAGGTCATAAGGGGCATGATGATTTGACGTCATCCCCACCTTCCTCCGGTTTGTCACCGGCAGTCTCCTTAGAGTGCCCAACTGAATGCTGGCAACTAAGAACAAGGGTTGCGCTC…	708	Bacillota	Bacilli	Bacillales	Bacillaceae	Bacillus	0	1249	99.01	Bacillus horikoshii/Bacillus cohnii*	Bacillus	35
P1-16CB-V	OM164220	H18	Control/Healthy Silks	P	CO462	B	799F	1	0.001443	CACACCGTGGCAAGCGCCCTCCCGAAGGTTAAGCTACCTGCTTCTGGTGCAACAAACTCCCATGGTGTGACGGGCGGTGTGTACAAGGCCCGGGAACGTATTCACCGCAGCAATGCTGATCTGCGATTACTAGCGATTCCGACTTCATGGAGTCGAGTTGCAGACTCCAATCCGGACTGAGATGGGGTTTCTGGGATTGGCTTACCGTCGCCGGCTTGCAGCCCTCTGTCCCCACCATTGTAGTACGTGTGTAGCCCTGGCCGTAAGGGCCATGATGACTTGACGTCATCCCCACCTTCCTCCGGTTTGTCACCGGCGGTCTCCTTAGAGTTCCCACCATTACGTGCTGGCAACTAAGGACAAGGGTTGCGCTCGTTGCGGGACTTAACCCAACATCTC…	693	Pseudomonadota	Gammaproteobacteria	Xanthomonadales	Xanthomonadaceae	Stenotrophomonas	0	1238	99.57	Stenotrophomonas maltophilia/Stenotrophomonas pavanii/Stenotrophomonas humi*	Stenotrophomonas	379&380
P1-16CT-X	OM262838	H19	Control/Healthy Silks	P	CO462	T	799F	8	0.0127389	GCCCTTGAGGCGTGGCTTCCGGAGCTAACGCGTTAAGTCGACCGCCTGGGGAGTACGGCCGCAAGGTTAAAACTCAAATGAATTGACGGGGGCCCGCACAAGCGGTGGAGCATGTGGTTTAATTCGATGCAACGCGAAGAACCTTACCTGGTCTTGACATCCACAGAACTTGNNNGAGNNGNNNTGGTGCCTTCGGGAACTGTGAGACAGGTGCTGCATGGCTGTCGTCAGCTCGTGTTGTGAAATGTTGGGTTAAGTCCCGCAACGAGCGCAACCCTTATCCTTTGTTGCCAGCGGTCAGGCCGGGAACTCAAAGGAGACTGCCAGTGATAAACTGGAGGAAGGTGGGGATGACGTCAAGTCATCATGGCCCTTACGACCAGGGCTACACACGTGCTA…	628	Pseudomonadota	Gammaproteobacteria	Enterobacterales	Enterobacteriaceae	0	0	1071	97.61	Kosakonia oryzendophytica/Kosakonia radicincitans/Atlantibacter hermannii/Kosakonia oryzae*	Kosakonia/Atlantibacter*	154
P1-18CB-Z	OM164221	H21	Control/Healthy Silks	P	P38157	B	799F	1	0.00141844	GTTACCTTGTTACGACTTCACCCCNGTCATGAATCACAAAGTGGTAAGCGCCCTCCCGAAGGTTAAGCTACCTACTTCTTTTGCAACCCACTCCCATGGTGTGACGGGCGGTGTGTACAAGGCCCGGGAACGTATTCACCGTAGCATTCTGATCTACGATTACTAGCGATTCCGACTTCATGGAGTCGAGTTGCAGACTCCAATCCGGACTACGACGCACTTTATGAGGTCCGCTTGCTCTCGCGAGTTCGCTTCTCTTTGTATGCGCCATTGTAGCACGTGTGTAGCCCTACTCGTAAGGGCCATGATGACTTGACGTCATCCCCACCTTCCTCCAGTTTATCACTGGCAGTCTCCTTTGAGTTCCCGGCCGGACCGCTGGCAACAAAGGATAAGGGT…	705	Pseudomonadota	Gammaproteobacteria	Enterobacterales	Enterobacteriaceae	0	0	1251	99.43	Enterobacter tabaci	Enterobacter	78
L1-18CB-S	OM164223	H23	Control/Healthy Silks	L	P38157	B	799F	11	0.0167173	TGCTAGGTGTTGGGGGGTTTCCGCCCNTCAGNTGCTGAAGCTAACGCATTAAGCACTCCGCCTGGGGAGTACGGCCGCAAGGCTGAAACTCAAAGGAATTGACGGGGACCCGCACAAGCGGTGGAGCATGTGGTTTAATTCGAAGCAACGCGAAGAACCTTACCAACTCTTGACATCCCATTGACCGCTTGAGAGATCAAGTTTTCCCTTCGGGGACAATGGTGACAGGTGGTGCATGGTTGNTCGTCAGCCCCNGTGTCNGTGAGATGGTTGGGTTAAGTCCCGCAACNGAGCGCAACCCCTATCCTTAGTTGCCAGCNATTCAGGTTGGGGCACTCTAGGGAAACGGCCGGTGNNACAAAACCGNGAGGAAGGTGGGGATGACGTCAAATCACCAAG…	658	Bacillota	Bacilli	Bacillales	Bacillaceae	Exiguobacterium	0	1031	96.2	Exiguobacterium acetylicum/Exiguobacterium indicum*	Exiguobacterium	99
P1-8CB-Y	OM262847	H24	Control/Healthy Silks	P	CO325	B	799F	0	0	TTACGACTTCACCCCAGTCATGAATCACAAAGTGGTAAGCGCCCTCCCGAAGGTTAAGCTACCTACTTCTTTTGCAACCCACTCCCATGGTGTGACGGGCGGTGTGTACAAGGCCCGGGAACGTATTCACCGTGACATTCTGATTCACGATTACTAGCGATTCCGACTTCATGGAGTCGAGTTGCAGACTCCAATCCGGACTACGACGCACTTTATGAGGTCCGCTAGCTCTCGCGAGATTGCTTCTCTTTGTATGCGCCATTGTAGCACGTGTGTAGCCCTGGTCGTAAGGGCCATGATGACTTGACGTCATCCCCACCTTCCTCCAGTTTATCACTGGCAGTCTCCTTTGAGTTCCCGGCCTAACCGCTGGCAACAAAGGATAAGGGTTGCGCTCGT…	702	Pseudomonadota	Gammaproteobacteria	Enterobacterales	Enterobacteriaceae	0	0	1235	99	Salmonella enterica/Atlantibacter hermannii*	Salmonella/Atlantibacter*	339
L1-18CB-Q	OM241078	H25	Control/Healthy Silks	L	P38157	B	799F	1	0.00147929	GGATTAGATACCCTGGTAGTNCACGCCGTAAACGATGTCGACTTGGAGGTTGTGCCCTTGAGGCGTGGCTTCCGGAGCTAACGCGTTAAGTCGACCGCCTGGGGAGTACGGCCGCAAGGTTAAAACTCAAATGAATTGACGGGGGCCCGCACAAGCGGTGGAGCATGTGGTTTAATTCGATGCAACGCGAAGAACCTTACCTGGTCTTGACATCCACAGAACTTGGCAGAGATGCCTTGGTGCCTTCGGGAACTGTGAGACAGGTGCTGCATGGCTGTCGTCAGCTCGTGTTGTGAAATGTTGGGTTAAGTCCCGCAACGAGCGCAACCCTTATCCTTTGTTGCCAGCGGTTAGGCCGGGAACTCAAAGGAGACTGCCAGTGATAAACTGGAGGAAGGT…	676	Pseudomonadota	Gammaproteobacteria	Enterobacterales	Enterobacteriaceae	0	0	1185	98.82	Kosakonia radicincitans	Kosakonia	152
L1-16CB-L	OM262831	H30	Control/Healthy Silks	L	CO462	B	799F	0	0	AGCTGTTGGGGCCTTCGGGCCTTGGTAGCGCAGCTAACGCGTGAAGTTGACCGCCTGGGGAGTACGGTCGCAAGATTAAAACTCAAAGGAATTGACGGGGACCCGCACAAGCGGTGGATGATGTGGATTAATTCGATGCAACGCGAAAAACCTTACCTACCCTTGACATGTCTGGAATCCCAAAGAGATTAGGGAGTGCTCGCAAGAGAACCGGAACACAGGTGCTGCATGGCTGTCGTCAGCTCGTGTCGTGAGATGTTGGGTTAAGTCCCGCAACGAGCGCAACCCTTGTCATTAGTTGCTACGAAAGGGCACTCTAATGAGACTGCCGGTGACAAACCGGAGGAAGGTGGGGATGACGTCAAGTCCTCATGGCCCTTATGGGTAGGGCTTCACACG…	651	Pseudomonadota	Betaproteobacteria	Burkholderiales	Alcaligenaceae	0	0	1130	98.46	Bordetella bronchiseptica/Candidimonas bauzanensis/Bordetella hinzii*	Bordetella/Candidimonas*	36
L1-16CT-Z	OM164225	H31	Control/Healthy Silks	L	CO462	T	799F	1	0.00138504	CTTGTTACGACTTCACCCCAGTCATCGGTCTTACCTTAGGAAGCGCCCTCCTTGCGGTTAGGCAACCTACTTCGGGTACTCCCAACTCCCGTGGTGTGACGGGCGGTGTGTACAAGGCCCGGGAACGTATTCACCGCGGCGTGCTGATCCGCGATTACTAGCGATTCCGACTTCATGTAGGCGAGTTGCAGCCTACAATCCGAACTGAGAATGGTTTTAAGAGATTAGCTAAACATCACTGTCTCGCGACTCGTTGTACCATCCATTGTAGCACGTGTGTAGCCCAGGTCATAAGGGGCATGATGATTTGACGTCATCCCCACCTTCCTCCGGTTTATCACCGGCAGTCTCGTTAGAGTGCCCAACTTAATGATGGCAACTAACAATAGGGGTTGCGCT…	722	Bacillota	Bacilli	Lactobacillales	Streptococcaceae	Lactococcus	Lactococcus lactis	1291	99.72	Lactococcus lactis	Lactococcus	158&161&159
P1-8CB-W	OM164226	H33	Control/Healthy Silks	P	CO325	B	799F	0	0	CCCTCCCGAAGGTTAAGCTACCTACTTCTTTTGCAACCCACTCCCATGGTGTGACGGGCGGTGTGTACAAGGCCCGGGAACGTATTCACCGTGGCATTCTGATCCACGATTACTAGCGATTCCGACTTCACGGAGTCGAGTTGCAGACTCCGATCCGGACTACGACGCACTTTATGAGGTCCGCTTGCTCTCGCGAGGTCGCTTCTCTTTGTATGCGCCATTGTAGCACGTGTGTAGCCCTACTCGTAAGGGCCATGATGACTTGACGTCATCCCCACCTTCCTCCGGTTTATCACCGGCAGTCTCCTTTGAGTTCCCGACCGAATCGCTGGCAACAAAGGATAAGGGTTGCGCTCGTTGCGGGACTTAACCCAACATTTCACAACACGAGCTGACGAC…	659	Pseudomonadota	Gammaproteobacteria	Enterobacterales	Erwiniaceae	Pantoea	Pantoea agglomerans	1185	99.85	Pantoea agglomerans	Pantoea	259&260&261
P1-5CB-VB	OM164227	H35	Control/Healthy Silks	P	CO431	B	799F	0	0	TACCTTGTTACGACTTCACCCCAGTCATGAATCACAAAGTGGTAAGCGCCCTCCCGAAGGTTAAGCTACCTACTTCTTTTGCAACCCACTCCCATGGTGTGACGGGCGGTGTGTACAAGGCCCGGGAACGTATTCACCGTGGCATTCTGATCCACGATTACTAGCGATTCCGACTTCACGGAGTCGAGTTGCAGACTCCGATCCGGACTACGACGCACTTTATGAGGTCCGCTTGCTCTCGCGAGGTCGCTTCTCTTTGTATGCGCCATTGTAGCACGTGTGTAGCCCTACTCGTAAGGGCCATGATGACTTGACGTCATCCCCACCTTCCTCCGGTTTATCACCGGCAGTCTCCTTTGAGTTCCCGACCGAATCGCTGGCAACAAAGGATAAGGGTTG…	723	Pseudomonadota	Gammaproteobacteria	Enterobacterales	Erwiniaceae	Pantoea	Pantoea agglomerans	1297	99.72	Pantoea agglomerans	Pantoea	248
P1-5CB-W	OM164228	H36	Control/Healthy Silks	P	CO431	B	799F	1	0.00139082	GTTACCTTGTTACGACTTCACCCCAGTCATGAATCACAAAGTGGTAAGCGCCCTCCCGAAGGTTAAGCTACCTACTTCTTTTGCAACCCACTCCCATGGTGTGACGGGCGGTGTGTACAAGGCCCGGGAACGTATTCACCGTGGCATTCTGATCCACGATTACTAGCGATTCCGACTTCACGGAGTCGAGTTGCAGACTCCGATCCGGACTACGACGCACTTTATGAGGTCCGCTTGCTCTCGCGAGGTCGCTTCTCTTTGTATGCGCCATTGTAGCACGTGTGTAGCCCTACTCGTAAGGGCCATGATGACTTGACGTCATCCCCACCTTCCTCCGGTTTATCACCGGCAGTCTCCTTTGAGTTCCCGACCGAATCGCTGGCAACAAAGGATAAGGGT…	719	Pseudomonadota	Gammaproteobacteria	Enterobacterales	Erwiniaceae	0	0	1276	99.3	Pantoea anthophila/Pantoea ananatis*	Pantoea	264&265
P1-16CT-Z	OM164229	H37	Control/Healthy Silks	P	CO462	T	799F	0	0	GTTACCTTGTTACGACTTCACCCCAGTCATGAATCACAAAGTGGTAAGCGCCCTCCCGAAGGTTAAGCTACCTACTTCTTTTGCAACCCACTCCCATGGTGTGACGGGCGGTGTGTACAAGGCCCGGGAACGTATTCACCGTGGCATTCTGATCCACGATTACTAGCGATTCCGACTTCACGGAGTCGAGTTGCAGACTCCGATCCGGACTACGACGCACTTTATGAGGTCCGCTTGCTCTCGCGAGGTCGCTTCTCTTTGTATGCGCCATTGTAGCACGTGTGTAGCCCTACTCGTAAGGGCCATGATGACTTGACGTCATCCCCACCTTCCTCCGGTTTATCACCGGCAGTCTCCTTTGAGTTCCCGACCGAATCGCTGGCAACAAAGGATAAGGGT…	727	Pseudomonadota	Gammaproteobacteria	Enterobacterales	Erwiniaceae	Pantoea	0	1307	99.86	Pantoea anthophila/Pantoea ananatis*	Pantoea	288&289&290&291&292&410
P1-6CT-Z	OM164230	H38	Control/Healthy Silks	P	CO430	T	799F	0	0	CGCCCTCCCGAAGGTTAAGCTACCTACTTCTTTTGCAACCCACTCCCATGGTGTGACGGGCGGTGTGTACAAGGCCCGGGAACGTATTCACCGTGGCATTCTGATCCACGATTACTAGCGATTCCGACTTCACGGAGTCGAGTTGCAGACTCCGATCCGGACTACGACGCACTTTGTGAGGTCCGCTTGCTCTCGCGAGGTCGCTTCTCTTTGTATGCGCCATTGTAGCACGTGTGTAGCCCTGCTCGTAAGGGCCATGATGACTTGACGTCATCCCCACCTTCCTCCGGTTTATCACCGGCAGTCTCCTTTGAGTTCCCGACCGAATCGCTGGCAACAAAGGATAAGGGTTGCGCTCGTTGCGGGACTTAACCCAACATTTCACAACACGAGCTGACG…	672	Pseudomonadota	Gammaproteobacteria	Enterobacterales	Erwiniaceae	Erwinia	Erwinia gerundensis	1204	99.7	Erwinia gerundensis	Erwinia	90
P1-16CB-R	OM164231	I02	Control/Healthy Silks	P	CO462	B	799F	2	0.00281294	TTACCTTGTTACGACTTAGCCCTAGTTACCTGTTTTACCCTAGGCAGCTCCTTTTACGGTCACCGACTTCAGGTACCCCAGACTTCCATGGCTTGACGGGCGGTGTGTACAAGGCCCGGGAACGTATTCACCGCGCCATGGCTGATGCGCGATTACTAGCGATTCCAGCTTCATAGAGTCGAGTTGCAGACTCCAATCCGAACTGAGACAGGCTTTCGAGATTCGCATCACATCGCTGTGTAGCTGCCCTCTGTACCTGCCATTGTATTACGTGTGTGGCCCAAGGCGTAAGGGCCGTGATGATTTGACGTCATCCCCACCTTCCTCTCTACTTGCGTAGGCAGTCTTACTAGAGTCCTCAACTTAATGGTAGCAACTAGTAACAGGGGTTGCGCTCGT…	711	Bacteroidota	Flavobacteriia	Flavobacteriales	Weeksellaceae	Chryseobacterium	Chryseobacterium daeguense	1240	98.87	Chryseobacterium daeguense	Chryseobacterium	44
P1-5CB-Z	OM164232	I04	Control/Healthy Silks	P	CO431	B	799F	1	0.0014881	TTCCTTGAGGAGTGGCTTCCGGAGCTAACGCGTTAAGTCGACCGCCTGGGGAGTACGGCCGCAAGGTTAAAACTCAAATGAATTGACGGGGGCCCGCACAAGCGGTGGAGCATGTGGTTTAATTCGATGCAACGCGAAGAACCTTACCTACTCTTGACATCCACGGAATTTGGCAGAGATGCCTTAGTGCCTTCGGGAACCGTGAGACAGGTGCTGCATGGCTGTCGTCAGCTCGTGTTGTGAAATGTTGGGTTAAGTCCCGCAACGAGCGCAACCCTTATCCTTTGTTGCCAGCGATTCGGTCGGGAACTCAAAGGAGACTGCCGGTGATAAACCGGAGGAAGGTGGGGATGACGTCAAGTCATCATGGCCCTTACGAGTAGGGCTACACACGTGCTA…	672	Pseudomonadota	Gammaproteobacteria	Enterobacterales	Erwiniaceae	Pantoea	Pantoea agglomerans	1201	99.85	Pantoea agglomerans	Pantoea	244&245&246&402
P1-8CB-X	OM164233	I05	Control/Healthy Silks	P	CO325	B	799F	0	0	TACCTTGTTACGACTTCACCCCAGTCATCGGCCACACCGTGGCAAGCGCCCTCCCGAAGGTTAAGCTACCTGCTTCTGGTGCAACAAACTCCCATGGTGTGACGGGCGGTGTGTACAAGGCCCGGGAACGTATTCACCGCAGCAATGCTGATCTGCGATTACTAGCGATTCCGACTTCATGGAGTCGAGTTGCAGACTCCAATCCGGACTGAGATAGGGTTTCTGGGATTGGCTTACCGTCGCCGGCTTGCAGCCCTCTGTCCCTACCATTGTAGTACGTGTGTAGCCCTGGCCGTAAGGGCCATGATGACTTGACGTCATCCCCACCTTCCTCCGGTTTGTCACCGGCGGTCTCCTTAGAGTTCCCACCATTACGTGCTGGCAACTAAGGACAAGGGT…	726	Pseudomonadota	Gammaproteobacteria	Xanthomonadales	Xanthomonadaceae	Stenotrophomonas	0	1307	99.86	Stenotrophomonas pavanii/ Stenotrophomonas humi/Stenotrophomonas maltophilia*	Stenotrophomonas	372&373&374&375
P1-13CB?-Z	OM164235	I08	Control/Healthy Silks	P	CO444	B	799F	0	0	GTTACCTTGTTACGACTTCACCCCAGTCATGAATCACAAAGTGGTAAGCGCCCTCCCGAAGGTTAAGCTACCTACTTCTTTTGCAACCCACTCCCATGGTGTGACGGGCGGTGTGTACAAGGCCCGGGAACGTATTCACCGTGGCATTCTGATCCACGATTACTAGCGATTCCGACTTCACGGAGTCGAGTTGCAGACTCCGATCCGGACTACGACGCACTTTATGAGGTCCGCTTGCTCTCGCGAGGTCGCTTCTCTTTGTATGCGCCATTGTAGCACGTGTGTAGCCCTACTCGTAAGGGCCATGATGACTTGACGTCATCCCCACCTTCCTCCGGTTTATCACCGGCAGTCTCCTTTGAGTTCCCGACCGAATCGCTGGCAACAAAGGATAAGGGT…	726	Pseudomonadota	Gammaproteobacteria	Enterobacterales	Erwiniaceae	Pantoea	0	1306	99.86	Pantoea anthophila/Pantoea ananatis*	Pantoea	288&289&290&291&292&410
P1-8CB-V	OM164236	I09	Control/Healthy Silks	P	CO325	B	799F	1	0.00139276	TACCTTGTTACGACTTCACCCCAGTCATGAATCACAAAGTGGTAAGCGCCCTCCCGAAGGTTAAGCTACCTACTTCTTTTGCAACCCACTCCCATGGTGTGACGGGCGGTGTGTACAAGGCCCGGGAACGTATTCACCGTGGCATTCTGATCCACGATTACTAGCGATTCCGACTTCACGGAGTCGAGTTGCAGACTCCGATCCGGACTACGACGCACTTTGTGAGGTCCGCTTGCTCTCGCGAGGTCGCTTCTCTTTGTATGCGCCATTGTAGCACGTGTGTAGCCCTACTCGTAAGGGCCATGATGACTTGACGTCATCCCCACCTTCCTCCGGTTTATCACCGGCAGTCTCCTTTGAGTTCCCGCCATCACGCGCTGGCAACAAAGGATAAGGGTT…	718	Pseudomonadota	Gammaproteobacteria	Enterobacterales	Erwiniaceae	Pantoea	Pantoea anthophila	1252	98.75	Pantoea anthophila	Pantoea	213
L1-12CB-W	OM164238	I12	Control/Healthy Silks	L	CO448	B	799F	0	0	GTTACGACTTAGTCCTAATTACCAATCCCACCTTCGACGGCTCCCTCCACAAGGGTTGGGCCACCGGCTTCAGGTGTTACCGACTTTCATGACTTGACGGGCGGTGTGTACAAGACCCGGGAACGTATTCACCGCAGCGTTGCTGATCTGCGATTACTAGCGACTCCGACTTCATGAGGTCGAGTTGCAGACCTCAATCCGAACTGGGACCGGCTTTTTGGGATTCGCTCCACCTCGCGGTATTGCAGCCCTTTGTACCGGCCATTGTAGCATGCGTGAAGCCCAAGACATAAGGGGCATGATGATTTGACGTCATCCCCACCTTCCTCCGAGTTGACCCCGGCAGTATCCCATGAGTTCCCACCATTACGTGCTGGCAACATAGAACGAGGGTTGCGC…	721	Actinomycetota	Actinomycetia	Micrococcales	Microbacteriaceae	Microbacterium	Microbacterium schleiferi	1292	99.72	Microbacterium schleiferi	Microbacterium	188&189
P1-3CT-100-Y	OM164239	I13	Control/Healthy Silks	P	CO433	T	799F	2	0.00304878	GCTCCTTTTACGGTCNCCGACTTCNGGTACCCCAGACTTCCATGGCTTGACGGGCGGTGTGTACAAGGCCCGGGAACGTATTCACCGCGCCATGGCTGATGCGCGATTACTAGCGATTCCAGCTTCATAGAGTCGAGTTGCAGACTCCAATCCGAACTGAGACAGGCTTTCGAGATTCGCATCACATCGCTGTGTAGCTGCCCTCTGTACCTGCCATTGTATTACGTGTGTGGCCCAAGGCGTAAGGGCCGTGATGATTTGACGTCATCCCCACCTTCCTCTCTACTTGCGTAGGCAGTCTTACTAGAGTCCTCAACTTAATGGTAGCAACTAGTAACAGGGGTTGCGCTCGTTGCAGGACTTAACCTAACACCTCACGGCACGAGCTGACGACAACCA…	656	Bacteroidota	Flavobacteriia	Flavobacteriales	Weeksellaceae	Chryseobacterium	Chryseobacterium camelliae	1177	99.7	Chryseobacterium camelliae	Chryseobacterium	44
P1-8CT-P1-Y	OM164240	I14	Control/Healthy Silks	P	CO325	T	799F	1	0.00146413	AGTTGTGGGGANATTCCACGGTTTCCGTGACGCAGCTAACGCATTAAGTTCCCCGCCTGGGGAGTACGGCCGCAAGGCTAAAACTCAAAGGAATTGACGGGGACCCGCACAAGCGGCGGAGCATGCGGATTAATTCGATGCAACGCGAAGAACCTTACCAAGGCTTGACATATACGAGAACGGGCCAGAAATGGTCAACTCTTTGGACACTCGTAAACAGGTGGTGCATGGTTGTCGTCAGCTCGTGTCGTGAGATGTTGGGTTAAGTCCCGCAACGAGCGCAACCCTCGTTCTATGTTGCCAGCACGTAATGGTGGGAACTCATGGGATACTGCCGGGGTCAACTCGGAGGAAGGTGGGGATGACGTCAAATCATCATGCCCCTTATGTCTTGGGCTT…	683	Actinomycetota	Actinomycetia	Micrococcales	Microbacteriaceae	Microbacterium	Microbacterium testaceum	1218	99.56	Microbacterium testaceum	Microbacterium	184
L1-16CB-S	OM241075	I15	Control/Healthy Silks	L	CO462	B	799F	0	0	GATTAGATACCCTGGTAGTCCACGCCGTAAACGATGAGTGCTAGATGTAGGGAGCTATAAGTTCTCTGTATCGCAGCTAACGCAATAAGCACTCCGCCTGGGGAGTACGACCGCAAGGTTGAAACTCAAAGGAATTGACGGGGGCCCGCACAAGCGGTGGAGCATGTGGTTTAATTCGAAGCAACGCGAAGAACCTTACCAGGTCTTGACATACTCGTGCTATTCCTAGAGATAGGAAGTTCCTTCGGGACACGGGATACAGGTGGTGCATGGTTGTCGTCAGCTCGTGTCGTGAGATGTTGGGTTAAGTCCCGCAACGAGCGCAACCCCTATTGTTAGTTGCCATCATTAAGTTGGGCACTCTAACGAGACTGCCGGTGATAAACCGGAGGAAGGTGG…	675	Bacillota	Bacilli	Lactobacillales	Streptococcaceae	Lactococcus	Lactococcus lactis	1218	100	Lactococcus lactis	Lactococcus	158&161&159
P1-16CB-U	OM164241	I16	Control/Healthy Silks	P	CO462	B	799F	0	0	TGGTAAGCGCCCTCCCGAAGGTTAAGCTACCTACTTCTTTTGCAACCCACTCCCATGGTGTGACGGGCGGTGTGTACAAGGCCCGGGAACGTATTCACCGTGGCATTCTGATCCACGATTACTAGCGATTCCGACTTCACGGAGTCGAGTTGCAGACTCCGATCCGGACTACGACGCACTTTATGAGGTCCGCTTGCTCTCGCGAGGTCGCTTCTCTTTGTATGCGCCATTGTAGCACGTGTGTAGCCCTACTCGTAAGGGCCATGATGACTTGACGTCATCCCCACCTTCCTCCGGTTTATCACCGGCAGTCTCCTTTGAGTTCCCGACCGAATCGCTGGCAACAAAGGATAAGGGTTGCGCTCGTTGCGGGACTTAACCCAACATTTCACAACACGA…	686	Pseudomonadota	Gammaproteobacteria	Enterobacterales	Erwiniaceae	Pantoea	0	1233	99.85	Pantoea anthophila/Pantoea ananatis*	Pantoea	288&289&290&291&292&410
P1-18CB-X	OM262845	I18	Control/Healthy Silks	P	P38157	B	799F	1	0.00138696	TTACCTTGTTACGACTTCACCCCAGTCATGAATCACAAAGTGGTAAGCGCCCTCCCGAAGGTTAAGCTACCTACTTCTTTTGCAACCCACTCCCATGGTGTGACGGGCGGTGTGTACAAGGCCCGGGAACGTATTCACCGTAGCATTCTGATCTACGATTACTAGCGATTCCGACTTCATGGAGTCGAGTTGCAGACTCCAATCCGGACTACGACGCACTTTATGAGGTCCGCTTGCTCTCGCGAGGTCGCTTCTCTTTGTATGCGCCATTGTAGCACGTGTGTAGCCCTACTCGTAAGGGCCATGATGACTTGACGTCATCCCCACCTTCCTCCAGTTTATCACTGGCAGTCTCCTTTGAGTTCCCGGCCGGACCGCTGGCAACAAAGGATAAGGGTT…	721	Pseudomonadota	Gammaproteobacteria	Enterobacterales	Enterobacteriaceae	0	0	1293	99.72	Cedecea lapagei/Enterobacter ludwigii*	Cedecea/Enterobacter*	41
P1-13CT-Z	OM164242	I19	Control/Healthy Silks	P	CO444	T	799F	2	0.00283286	GTTACGANTTAGCCCTAGTTACNTGTTTTACCCTAGGCAGCTCCTTTTTACGGTCACCGACTTCAGGTACCCCAGACTTCCATGGCTTGACGGGCGGTGTGTACAAGGCCCGGGAACGTATTCACCGCGCCATGGCTGATGCGCGATTACTAGCGATTCCAGCTTCATAGAGTCGAGTTGCAGACTCCAATCCGAACTGAGACAGGCTTTCGAGATTCGCATCACATCGCTGTGTAGCTGCCCTCTGTACCTGCCATTGTATTACGTGTGTGGCCCAAGGCGTAAGGGCCGTGATGATTTGACGTCATCCCCACCTTCCTCTCTACTTGCGTAGGCAGTCTTACTAGAGTCCTCAACTTAATGGTAGCAACTAGTAACAGGGGTTGCGCTCGTTGCAGG…	706	Bacteroidota	Flavobacteriia	Flavobacteriales	Weeksellaceae	Chryseobacterium	0	1232	98.73	Chryseobacterium daeguense/Chryseobacterium camelliae*	Chryseobacterium	44
P1-16CT-Y	OM164243	I21	Control/Healthy Silks	P	CO462	T	799F	2	0.003003	CGTTTTTGGGTTTTCGGANTCNGAGACTAAGCGAAAGTGATAAGTTAGCCACCTGGGGAGTACGTTCGCAAGAATGAAACTCAAAGGAATTGACGGGGGCCCGCACAAGCGGTGGATTATGTGGTTTAATTCGATGATACGCGAGGAACCTTACCAAGGCTTAAATGGGAATTGATCGGTTTAGAAATAGACCTTCCTTCGGGCAATTTTCAAGGTGCTGCATGGTTGTCGTCAGCTCGTGCCGTGAGGTGTTAGGTTAAGTCCTGCAACGAGCGCAACCCCTGTTACTAGTTGCTACCATTAAGTTGAGGACTCTAGTAAGACTGCCTACGCAAGTAGAGAGGAAGGTGGGGATGACGTCAAATCATCACGGCCCTTACGCCTTGGGCCACACACGTA…	666	Bacteroidota	Flavobacteriia	Flavobacteriales	Weeksellaceae	Chryseobacterium	0	1168	98.8	Chryseobacterium daeguense/Chryseobacterium camelliae*	Chryseobacterium	44
L1-18CB-Y	OM240999	J05	Control/Healthy Silks	L	P38157	B	799F	2	0.00298954	TCCTTGAGGAGTGGCTTCCGGAGCTAACGCGTTAAGTCGACCGCCTGGGGAGTACGGCCGCAAGGTTAAAACTCAAATGAATTGACGGGGGCCCGCACAAGCGGTGGAGCATGTGGTTTAATTCGATGCAACGCGAAGAACCTTACCTACTCTTGACATCCAGAGAANTTGGCAGAGATGCTTTGGTGCCTTCGGGAACTCTGAGACAGGTGCTGCATGGCTGTCGTCAGCTCGTGTTGTGAAATGTTGGGTTAAGTCCCGCAACGAGCGCAACCCTTATCCTTTGTTGCCAGCGATTCGGTCGGGAACTCAAAGGAGACTGCCGGTGATAAACCGGAGGAAGGTGGGGATGACGTCAAGTCATCATGGCCCTTACGAGTAGGGCTACACACGTGCTAC…	669	Pseudomonadota	Gammaproteobacteria	Enterobacterales	Erwiniaceae	0	0	1189	99.4	Pantoea anthophila/Pantoea ananatis*	Pantoea	266&267&409
L1-18CB-V	OM164244	J06	Control/Healthy Silks	L	P38157	B	799F	1	0.00139665	CGACTTCACCCCAGTCATGAATCACAAAGTGGTAAGCGCCCTCCCGAAGGTTAAGCTACCTACTTCTTTTGCAACCCACTCCCATGGTGTGACGGGCGGTGTGTACAAGGCCCGGGAACGTATTCACCGTGGCATTCTGATCCACGATTACTAGCGATTCCGACTTCACGGAGTCGAGTTGCAGACTCCGATCCGGACTACGACGCACTTTGTGAGGTCCGCTTGCTCTCGCGAGGTCGCTTCTCTTTGTATGCGCCATTGTAGCACGTGTGTAGCCCTACTCGTAAGGGCCATGATGACTTGACGTCATCCCCACCTTCCTCCGGTTTATCACCGGCAGTCTCCTTTGAGTTCCCGACCGAATCGCTGGCAACAAAGGATAAGGGTTGCGCTCGTTGC…	716	Pseudomonadota	Gammaproteobacteria	Enterobacterales	Erwiniaceae	Pantoea	Pantoea stewartii	1267	99.3	Pantoea stewartii	Pantoea	228
P1-5CB-VA	OM164245	J07	Control/Healthy Silks	P	CO431	B	799F	0	0	TACCTTGTTACGACTTCACCCCAGTCATGAATCACAAAGTGGTAAGCGCCCTCCCGAAGGTTAAGCTACCTACTTCTTTTGCAACCCACTCCCATGGTGTGACGGGCGGTGTGTACAAGGCCCGGGAACGTATTCACCGTGGCATTCTGATCCACGATTACTAGCGATTCCGACTTCACGGAGTCGAGTTGCAGACTCCGATCCGGACTACGACGCACTTTATGAGGTCCGCTTGCTCTCGCGAGGTCGCTTCTCTTTGTATGCGCCATTGTAGCACGTGTGTAGCCCTACTCGTAAGGGCCATGATGACTTGACGTCATCCCCACCTTCCTCCGGTTTATCACCGGCAGTCTCCTTTGAGTTCCCGACCGAATCGCTGGCAACAAAGGATAAGGGTTG…	724	Pseudomonadota	Gammaproteobacteria	Enterobacterales	Erwiniaceae	Pantoea	Pantoea agglomerans	1302	99.86	Pantoea agglomerans	Pantoea	259&260&261
P1-8CT-M1-X	OM241053	J08	Control/Healthy Silks	P	CO325	T	799F	1	0.00146413	CAGGATTAGATACCCTGGTAGTCCACGCCGTAAACGATGTCGACTTGGAGGTTGTTCCCTTGAGGAGTGGCTTCCGGAGCTAACGCGTTAAGTCGACCGCCTGGGGAGTACGGCCGCAAGGTTAAAACTCAAATGAATTGACGGGGGCCCGCACAAGCGGTGGAGCATGTGGTTTAATTCGATGCAACGCGAAGAACCTTACCTACTCTTGACATCCAGAGAATTTAGCAGAGATGCTTTGGTGCCTTCGGGAACTNTGAGACAGGTGCTGCATGGCTGTCGTCAGCTCGTGTTGTGAAATGTTGGGTTAAGTCCCGCAACGAGCGCAACCCTTATCCTTTGTTGCCAGCGATTCGGTCGGGAACTCAAAGGAGACTGCCGGTGATAAACCGGAGGAAG…	683	Pseudomonadota	Gammaproteobacteria	Enterobacterales	Erwiniaceae	0	0	1220	99.56	Pantoea anthophila/Pantoea ananatis*	Pantoea	271&274&276&412
L1-13CB?-Z	OM164246	J11	Control/Healthy Silks	L	CO444	B	799F	2	0.00275103	GTTACCTTGTTACGACTTCACCCCAGTCATGAATCACAAAGTGGTAAGCGCCCTCCCGAAGGTTAAGCTACCTACTTCTTTTGCAACCCACTCCCATGGTGTGACGGGCGGTGTGTACAAGGCCCGGGAACGTATTCACCGTGGCATTCTGATCCACGATTACTAGCGATTCCGACTTCACGGAGTCGAGTTGCAGACTCCGATCCGGACTACGACGCACTTTGTGAGGTCCGCTTGCTCTCGCGAGGTCGCTTCTCTTTGTATGCGCCATTGTAGCACGTGTGTAGCCCTACTCGTAAGGGCCATGATGACTTGACGTCATCCCCACCTTCCTCCGGTTTATCACCGGCAGTCTCCTTTGAGTTCCCGCCATCACGCGCTGGCAACAAAGGATAAGGG…	727	Pseudomonadota	Gammaproteobacteria	Enterobacterales	Erwiniaceae	Pantoea	Pantoea anthophila	1262	98.76	Pantoea anthophila	Pantoea	215
L1-8CT-P10-Z	OM241005	J12	Control/Healthy Silks	L	CO325	T	799F	2	0.00352113	CTTGAGATCTTAGTGGCGCAGCTAACGCATTAAGTTGACCGCCTGGGGAGTACGGCCGCAAGGTTAAAACTCAAATGAATTGACGGGGGCCCGCACAAGCGGTGGAGCATGTGGTTTAATTCGAAGCAACGCGAAGAACCTTACCTGGCCTTGACATGCTGAGAACTTTCCAGAGATGGATTGGTGCCTTCGGGAACTCAGACACAGGTGCTGCATGGCTGTCGTCAGCTCGTGTCGTGAGATGTTGGGTTAAGTCCCGTAACGAGCGCAACCCTTGTCCTTAGTTACCAGCACATTATGGTGGGCACTCTAAGGAGACTGCCGGTGACAAACCGGAGGAAGGTGGGGATGACGTCAAGTCATCATGGCCCTTACGGCCAGGGCTACACACGTGCTACA…	568	Pseudomonadota	Gammaproteobacteria	Pseudomonadales	Pseudomonadaceae	Pseudomonas	0	997	99.12	Pseudomonas oryzihabitans/Pseudomonas psychrotolerans*	Pseudomonas	308
L1-16CB-N	OM164247	J13	Control/Healthy Silks	L	CO462	B	799F	1	0.00137552	ACCTTGTTACGANTTAGTCCTAATTACCAATCCCACCTTCGACGGCTCCCTCCACAAGGGTTGGGCCACCGGCTTCAGGTGTTACCGACTTTCATGACTTGACGGGCGGTGTGTACAAGACCCGGGAACGTATTCACCGCAGCGTTGCTGATCTGCGATTACTAGCGACTCCGACTTCATGAGGTCGAGTTGCAGACCTCAATCCGAACTGGGACCGGCTTTTTGGGATTCGCTCCACCTCGCGGTATTGCAGCCCTTTGTACCGGCCATTGTAGCATGCGTGAAGCCCAAGACATAAGGGGCATGATGATTTGACGTCATCCCCACCTTCCTCCGAGTTGACCCCGGCAGTATCCCATGAGTTCCCACCATTACGTGCTGGCAACATAGAACGAGGGT…	727	Actinomycetota	Actinomycetia	Micrococcales	Microbacteriaceae	Microbacterium	Microbacterium schleiferi	1295	99.45	Microbacterium schleiferi	Microbacterium	182
L1-8CT-M1-Z	OM164248	J14	Control/Healthy Silks	L	CO325	T	799F	4	0.00603318	CGCCCTCCCGAAGGTTAAGCTACCTACTTCTTTTTGCAACCCACTCCCATGGTGTGACGGGCGGTGTGTACAAGGCCCGGGAACGTATTCACCGTGGCATTCTGATCCACGATTACTAGCGATTCCGACTTCACGGAGTCGAGTTGCAGACTCCGATCCGGACTACGACGCACTTTATGAGGTCCGCTTGCTCTCGCGAGGTCGCTTCTCTTTGTATGCGCCATTGTAGCACGTGTGTAGCCCTACTCGTAAGGGCCATGATGACTTGACGTCATCCCCACCTTCCTCCGGTTTATCACCGGCAGTCTCCTTTGAGTTCCCGACCGAATCGCTGGCAACAAAGGATAAGGGTTGCGCTCGTTGCGGGACTTAACCCAACATTTCACAACACGAGCTGAC…	663	Pseudomonadota	Gammaproteobacteria	Enterobacterales	Erwiniaceae	Pantoea	Pantoea agglomerans	1165	99.1	Pantoea agglomerans	Pantoea	259&260&261
P1-5CB-Y	OM164249	K01	Control/Healthy Silks	P	CO431	B	799F	0	0	TTACCTTAGGAAGCGCCCTCCTTGCGGTTAGGCAACCTACTTCGGGTACTCCCAACTCCCCGTGGTGTGACGGGCGGTGTGTACAAGGCCCGGGAACGTATTCACCGCGGCGTGCTGATCCGCGATTACTAGCGATTCCGACTTCATGTAGGCGAGTTGCAGCCTACAATCCGAACTGAGAATGGTTTTAAGAGATTAGCTAAACATCACTGTCTCGCGACTCGTTGTACCATCCATTGTAGCACGTGTGTAGCCCAGGTCATAAGGGGCATGATGATTTGACGTCATCCCCACCTTCCTCCGGTTTATCACCGGCAGTCTCGTTAGAGTGCCCAACTTAATGATGGCAACTAACAATAGGGGTTGCGCTCGTTGCGGGACTTAACCCAACATCTCACG…	692	Bacillota	Bacilli	Lactobacillales	Streptococcaceae	Lactococcus	0	1241	99.86	Lactococcus cremoris/ Lactococcus lactis	Lactococcus	164
P1-13CB-G1-Z	OM164250	K05	Control/Healthy Silks	P	CO444	B	799F	4	0.00549451	TACCTTGTTACGANTTNGTCCCAATCGCCGATNCCACCTTCGACGGCTCCCTCCCCGTAAGGGGTTAGGCCACCGGCTTCGGGTGTTACCGACTTTCATGACGTGACGGGCGGTGTGTACAAGGCCCGGGAACGTATTCACCGCAGCGTTGCTGATCTGCGATTACTAGCGACTCCGACTTCACGGGGTCGAGTTGCAGACCCCGATCCGAACTGAGACCAGCTTTAAGGGATTCGCTCCACCTCACGGTCTCGCAGCCCTCTGTACTGGCCATTGTAGCATGTGTGAAGCCCTGGACATAAGGGGCATGATGACTTGACGTCGTCCCCACCTTCCTCCGAGTTGACCCCGGCAGTCTCTTACGAGTCCCCACCATTACGTGCTGGCAACATAAGACAA…	728	Actinomycetota	Actinomycetia	Mycobacteriales	Nocardioidaceae	Rhodococcus	0	1269	98.63	Rhodococcus cercidiphylli/Rhodococcus yunnanensis*	Rhodococcus	332
L1-16CB-M	OM164252	K08	Control/Healthy Silks	L	CO462	B	799F	2	0.00282885	TAATTACCGATCCCACCTTCGACGGCTCCCTCCACAAGGGTTAGGCCACCGGCTTCAGGTGTTACCGACTTTCATGACTTGACGGGCGGTGTGTACAAGACCCGGGAACGTATTCACCGCAGCGTTGCTGATCTGCGATTACTAGCGACTCCGACTTCATGAGGTCGAGTTGCAGACCTCAATCCGAACTGGGACCGGCTTTTTGGGATTCGCTCCACCTCACGGTATTGCAGCCCTTTGTACCGGCCATTGTAGCATGCGTGAAGCCCAAGACATAAGGGGCATGATGATTTGACGTCATCCCCACCTTCCTCCGAGTTGACCCCGGCAGTATCCCATGAGTTCCCACCATTACGTGCTGGCAACATAGAACGAGGGTTGCGCTCGTTGCGGGACTTA…	707	Actinomycetota	Actinomycetia	Micrococcales	Microbacteriaceae	Microbacterium	Microbacterium flavescens	1242	98.87	Microbacterium flavescens	Microbacterium	178
P1-17CB-Z	OM164253	K10	Control/Healthy Silks	P	P35837	B	799F	2	0.00274725	TACCTTGTTACGANTTAGTCNTAATTACCGATCCCACCTTCGACGGCTCCCTCCACAAGGGTTAGGCCACCGGCTTCAGGTGTTACCGACTTTCATGACTTGACGGGCGGTGTGTACAAGACCCGGGAACGTATTCACCGCAGCGTTGCTGATCTGCGATTACTAGCGACTCCGACTTCATGAGGTCGAGTTGCAGACCTCAATCCGAACTGGGACCGGCTTTTTGGGATTCGCTCCACCTCACGGTATCGCAGCCCTTTGTACCGGCCATTGTAGCATGCGTGAAGCCCAAGACATAAGGGGCATGATGATTTGACGTCATCCCCACCTTCCTCCGAGTTGACCCCGGCAGTATCCCATGAGTTCCCACCATTACGTGCTGGCAACATAGAACGAGGG…	728	Actinomycetota	Actinomycetia	Micrococcales	Microbacteriaceae	Microbacterium	Microbacterium testaceum	1290	99.45	Microbacterium testaceum	Microbacterium	175
P1-13CB-G1-ZY	OM241099	K14	Control/Healthy Silks	P	CO444	B	799F	14	0.0219092	TTACCTCACCGGCTTCNGGTGTTGCAAACTCTCNTGGTGTGACGGGCGGTGTGTACAAGACCCGGGAACGTATTCACCGCAGTATGCTGACCTGCGATTACTAGCGATTCCGACTTCATGCAGGCGAGTTGCANCCTGCAATCCGAACTGGGAACGGCTTTATGGGATTGGCTCCACCTCGCGGTCTCGCTGCCCTTTGTACCGTCCATTGTAGCACGTGTGTAGCCCAACTCATAAGGGGCATGATGATTTGACGTCATCCCCACCTTCCTCCGGTTTGTCACCGGCAGTCTCCCTAGAGTGCCCAACTGAATGCTGGCAACTAAAGATAGGGGTTGCGCTCGTTGCGGGACTTAACCCAACATCTCACGACACGANCTGACAACAACCATGCACCAC…	639	Bacillota	Bacilli	Bacillales	Bacillaceae	Exiguobacterium	0	1081	97.33	Exiguobacterium acetylicum	Exiguobacterium	100
P1-16CB-X	OM262846	K15	Control/Healthy Silks	P	CO462	B	799F	2	0.00276243	TTACCTTGTTACGACTTCACCCCAGTCATGAATCACAAAGTGGTAAGCGCCCTCCCGAAGGTTAAGCTACCTACTTCTTTTGCAACCCACTCCCATGGTGTGACGGGCGGTGTGTACAAGGCCCGGGAACGTATTCACCGTAGCATTCTGATCTACGATTACTAGCGATTCCGACTTCATGGAGTCGAGTTGCAGACTCCAATCCGGACTACGACGCACTTTATGAGGTCCGCTTGCTCTCGCGAGGTCGCTTCTCTTTGTATGCGCCATTGTAGCACGTGTGTAGCCCTACTCGTAAGGGCCATGATGACTTGACGTCATCCCCACCTTCCTCCAGTTTATCACTGGCAGTCTCCTTTGAGTTCCCGGCCGGACCGCTGGCAACAAAGGATAAGGGTT…	724	Pseudomonadota	Gammaproteobacteria	Enterobacterales	Enterobacteriaceae	0	0	1295	99.59	Cedecea lapagei/Enterobacter ludwigii*	Cedecea/Enterobacter*	41
P1-16CB-Y	OM262842	K16	Control/Healthy Silks	P	CO462	B	799F	3	0.00413793	TACCTTGTTACGACTTCACCCCNNTCATGAATCACAAAGTGGTAAGCGCCCTCCCGAAGGTTAAGCTACCTACTTCTTTTGCAACCCACTCCCATGGTGTGACGGGCGGTGTGTACAAGGCCCGGGAACGTATTCACCGTAGCATTCTGATCTACGATTACTAGCGATTCCGACTTCATGGAGTCGAGTTGCAGACTCCAATCCGGACTACGACGCACTTTATGAGGTCCGCTTGCTCTCGCGAGGTCGCTTCTCTTTGTATGCGCCATTGTAGCACGTGTGTAGCCCTACTCGTAAGGGCCATGATGACTTGACGTCATCCCCACCTTCCTCCAGTTTATCACTGGCAGTCTCCTTTGAGTTCCCGGCCGGACCGCTGGCAACAAAGGATAAGGGTTG…	725	Pseudomonadota	Gammaproteobacteria	Enterobacterales	Enterobacteriaceae	0	0	1293	99.45	Cedecea lapagei/Enterobacter ludwigii*	Cedecea/Enterobacter*	41
P1-18CB-Y	OM164255	K17	Control/Healthy Silks	P	P38157	B	799F	2	0.00293255	TAGCGCCCTCCCGAAGGNTAAGCTACCTACTTCTTTTGCAACCCACTCCCATGGTGTGACGGGCGGTGTGTACAAGGCCCGGGAACGTATTCACCGTGGCATTCTGATCCACGATTACTAGCGATTCCGACTTCACGGAGTCGAGTTGCAGACTCCGATCCGGACTACGACGCACTTTATGAGGTCCGCTTGCTCTCGCGAGGTCGCTTCTCTTTGTATGCGCCATTGTAGCACGTGTGTAGCCCTACTCGTAAGGGCCATGATGACTTGACGTCATCCCCACCTTCCTCCGGTTTATCACCGGCAGTCTCCTTTGAGTTCCCGACCGAATCGCTGGCAACAAAGGATAAGGGTTGCGCTCGTTGCGGGACTTAACCCAACATTTCACAACACGAGCTG…	682	Pseudomonadota	Gammaproteobacteria	Enterobacterales	Erwiniaceae	Pantoea	0	1205	99.41	Pantoea anthophila/Pantoea ananatis*	Pantoea	287
L1-1CB-A	OM164259	L26	Control/Healthy Silks	L	CO449	B	27F	66	0.0468417	TGCAGTCGAGCGGTAGCACANANAGCTTGCTCNCGGGTGACGAGCGGCGGANGGGTGAGTAATGTCTGGGAAACTGCCTGATGGAGGGGGATAACTACTGGAAACGGTAGCTAATACCGCATAACGTCNCAAGACCNANGTGGGGGACCTTCGGGCCTCNTGCCATCNNATGTGCCCNGATGGGATTAGCTAGTANGTGGGGTANTGGCTCACCTAGGCGACNATCCCTAGCTGGTCNGAGAGGATGACCNNCCACACTGGAACTGAGACACGGTCCANACTCCTACGGGAGGCANCNNTGGGGAATATTGCACAATGGGCGCAAGCCTGATGCANCCATGCCGCGTGTANNAANAANGCCTTCGGGTTGTAAAGTACTTTCANCGAGGANGAANGCNT…	1409	Pseudomonadota	Gammaproteobacteria	Enterobacterales	Enterobacteriaceae	0	0	2226	94.52	Klebsiella aerogenes	Klebsiella	395
P1-4CT-K	MT777194	L66	Control/Healthy Silks	P	CO432	T	27F	3	0.00222058	CGGACGCTGACGAGTGGCGAACGGGTGAGTAATACATCGGAACGTGCCCAGTCGTGGGGGATAACTACTCGAAAGAGTAGCTAATACCGCATACGATCTGAGGATGAAAGCGGGGGACCTTCGGGCCTCGCGCGATTGGAGCGGCCGATGGCAGATTAGGTAGTTGGTGGGATAAAAGCTTACCAAGCCGACGATCTGTAGCTGGTCTGAGAGGACGACCAGCCACACTGGGACTGAGACACGGCCCAGACTCCTACGGGAGGCAGCAGTGGGGAATTTTGGACAATGGGCGAAAGCCTGATCCAGCAATGCCGCGTGCAGGATGAAGGCCTTCGGGTTGTAAACTGCTTTTGTACGGAACGAAAAAGCTTCTCCTAATACGAGAGGCCCATGACGGTA…	1351	Pseudomonadota	Betaproteobacteria	Burkholderiales	Comamonadaceae	Delftia	Delftia acidovorans	2470	99.7	Delftia acidovorans	Delftia	64
P1-1CB-C	OM164274	M05	Control/Healthy Silks	P	CO449	B	799F	1	0.00137741	TTACCTNGTTACGACTTCACCCCAGTCATGAATCACAAAGTGGTAAGCGCCCTCCCGAAGGTTAAGCTACCTACTTCTTTTGCAACCCACTCCCATGGTGTGACGGGCGGTGTGTACAAGGCCCGGGAACGTATTCACCGTAGCATTCTGATCTACGATTACTAGCGATTCCGACTTCATGGAGTCGAGTTGCAGACTCCAATCCGGACTACGACATACTTTATGAGGTCCGCTTGCTCTCGCGAGGTCGCTTCTCTTTGTATATGCCATTGTAGCACGTGTGTAGCCCTACTCGTAAGGGCCATGATGACTTGACGTCATCCCCACCTTCCTCCAGTTTATCACTGGCAGTCTCCTTTGAGTTCCCGGCCGAACCGCTGGCAACAAAGGATAAGGGTT…	726	Pseudomonadota	Gammaproteobacteria	Enterobacterales	Enterobacteriaceae	0	0	1294	99.59	Klebsiella aerogenes	Klebsiella	118&119&121&125&124
P1-1CB-B	OM164275	M06	Control/Healthy Silks	P	CO449	B	799F	0	0	GTTACGACTTCACCCCAGTCATGAATCACAAAGTGGTAAGCGCCCTCCCGAAGGTTAAGCTACCTACTTCTTTTGCAACCCACTCCCATGGTGTGACGGGCGGTGTGTACAAGGCCCGGGAACGTATTCACCGTAGCATTCTGATCTACGATTACTAGCGATTCCGACTTCATGGAGTCGAGTTGCAGACTCCAATCCGGACTACGACATACTTTATGAGGTCCGCTTGCTCTCGCGAGGTCGCTTCTCTTTGTATATGCCATTGTAGCACGTGTGTAGCCCTACTCGTAAGGGCCATGATGACTTGACGTCATCCCCACCTTCCTCCAGTTTATCACTGGCAGTCTCCTTTGAGTTCCCGGCCGAACCGCTGGCAACAAAGGATAAGGGTTGCGCTCG…	720	Pseudomonadota	Gammaproteobacteria	Enterobacterales	Enterobacteriaceae	0	0	1287	99.72	Klebsiella aerogenes	Klebsiella	118&119&121&122&125&124
P1-4CT-B	OM241090	M11	Control/Healthy Silks	P	CO432	T	27F	8	0.0148976	TAAGCNCCCTCCCGAAGGTTAAGCTACNTACTTCTTTTGCAACCCACTCCCATGGTGTGACGGGCGGTGTGTACAAGGCCCGGGAACGTATTCACCGTAGCATTCTGATCTACGATTACTAGCGATTCCGACTTCATGGAGTCGAGTTGCAGACTCCAATCCGGACTACGACATACTTTATGAGGTCCGCTTGCTCTCGCGAGGTCGCTTCTCTTTGTATATGCCATTGTAGCACGTGTGTAGCCCTACTCGTAAGGGCCATGATGACTTGACGTCATCCCCACCTTCCTCCAGTTTATCACTGGCAGTCTCCTTTGAGTTCCCGGCCNGANNGCTGGCAACAAAGGATAAGGGTTGCGCTCGTTGCGGGACTTAACCCAACATTTCACAACACGAGCT…	537	Pseudomonadota	Gammaproteobacteria	Enterobacterales	Enterobacteriaceae	0	0	940	98.51	Klebsiella aerogenes	Klebsiella	117&118&119&121&122&123&124&125&126&128&149&328&329&399&405&406
P1-4CT-G	MT777196	M15	Control/Healthy Silks	P	CO432	T	27F	3	0.00213371	ATGCAGTCGAGCGGTAGCACAGAGAGCTTGCTCTCGGGTGACGAGCGGCGGACGGGTGAGTAATGTCTGGGAAACTGCCTGATGGAGGGGGATAACTACTGGAAACGGTAGCTAATACCGCATAACGTCGCAAGACCAAAGTGGGGGACCTTCGGGCCTCATGCCATCAGATGTGCCCAGATGGGATTAGCTAGTAGGTGGGGTAATGGCTCACCTAGGCGACGATCCCTAGCTGGTCTGAGAGGATGACCAGCCACACTGGAACTGAGACACGGTCCAGACTCCTACGGGAGGCAGCAGTGGGGAATATTGCACAATGGGCGCAAGCCTGATGCAGCCATGCCGCGTGTATGAAGAAGGCCTTCGGGTTGTAAAGTACTTTCAGCGAGGAGGAAGGCA…	1406	Pseudomonadota	Gammaproteobacteria	Enterobacterales	Enterobacteriaceae	Klebsiella	Klebsiella aerogenes	2558	99.43	Klebsiella aerogenes	Klebsiella	125
P1-1CB-E	OM302490	M55	Control/Healthy Silks	P	CO449	B	27F	5	0.00502513	two shorter sequences: CATGCAGTCGAGCGGTAGCACAGAGAGCTTGCTCTCGGGTGACGAGCGGCGGACGGGTGAGTAATGTCTGGGAAACTGCCTGATGGAGGGGGATAACTACTGGAAACGGTAGCTAATACCGCATAACGTCGCAAGACCAAAGTGGGGGACCTTCGGGCCTCATGCCATCAGATGTGCCCAGATGGGATTAGCTAGTAGGTGGGGTAATGGCTCACCTAGGCGACGATCCCTAGCTGGTCTGAGAGGATGACCAGCCACACTGGAACTGAGACACGGTCCAGACTCCTACGGGAGGCAGCAGTGGGGAATATTGCACAATGGGCGCAAGCCTGATGCAGCCATGCCGCGTGTATGAAGAAGGCCTTCGGGTTGTAAA…	568&427	Pseudomonadota	Gammaproteobacteria	Enterobacterales	Enterobacteriaceae	0	0	1018/785	98.77/99.77	Klebsiella aerogenes	Klebsiella	117&125&126&128&405
P1-6CB-E	OM240997	N03	Control/Healthy Silks	P	CO430	B	799F	0	0	CCTTGAGATCTTAGTGGCGCAGCTAACGCATTAAGTTGACCGCCTGGGGAGTACGGCCGCAAGGTTAAAACTCAAATGAATTGACGGGGGCCCGCACAAGCGGTGGAGCATGTGGTTTAATTCGAAGCAACGCGAAGAACCTTACCTGGCCTTGACATGCTGAGAACTTTCCAGAGATGGATTGGTGCCTTCGGGAACTCAGACACAGGTGCTGCATGGCTGTCGTCAGCTCGTGTCGTGAGATGTTGGGTTAAGTCCCGTAACGAGCGCAACCCTTGTCCTTAGTTACCAGCACGTAATGGTGGGCACTCTAAGGAGACTGCCGGTGACAAACCGGAGGAAGGTGGGGATGACGTCAAGTCATCATGGCCCTTACGGCCAGGGCTACACACGTGCTAC…	659	Pseudomonadota	Gammaproteobacteria	Pseudomonadales	Pseudomonadaceae	Pseudomonas	0	1206	99.7	Pseudomonas pseudoalcaligenes	Pseudomonas	306
L1-2CB-M	OM164286	N12	Control/Healthy Silks	L	CO441	B	27F	3	0.00223881	TTGCTGGGTACTCGAGTGGCGAACGGGTGAGTAACACGTGGGTGATCTGCCCTGCACTCTGGGATAAGCCTGGGAAACTGGGTCTAATACCGGATATGACCAACTGTCGCATGGTGGTTGGTGGAAAGCTTTTGCGGTGTGGGATGGGCCCGCGGCCTATCAGCTTGTTGGTGGGGTAATGGCCTACCAAGGCGACGACGGGTAGCCGACCTGAGAGGGTGATCGGCCACACTGGGACTGAGACACGGCCCAGACTCCTACGGGAGGCAGCAGTGGGGAATATTGCACAATGGGCGCAAGCCTGATGCAGCGACGCCGCGTGAGGGATGACGGCCTTCGGGTTGTAAACCTCTTTCACCAGGGACGAAGCGTGAGTGACGGTACCTGGAGAAGAAGCAC…	1340	Actinomycetota	Actinomycetia	Mycobacteriales	Gordoniaceae	Gordonia	0	2451	99.7	Gordonia hongkongensis	Gordonia	112
L1-2CB-L	OM164287	N13	Control/Healthy Silks	L	CO441	B	27F	0	0	TGCAAGTCGAACGGTGAAGCCAAGCTTGCTTGGTGGATCAGTGGCGAACGGGTGAGTAACACGTGAGCAACCTGCCCTGGACTCTGGGATAAGCGCTGGAAACGGTGTCTAATACTGGATATGAGGCGTGATCGCATGGTCATGTTTGGAAAGATTTTTCGGTCTGGGATGGGCTCGCGGCCTATCAGCTTGTTGGTGAGGTAATGGCTCACCAAGGCGTCGACGGGTAGCCGGCCTGAGAGGGTGACCGGCCACACTGGGACTGAGACACGGCCCAGACTCCTACGGGAGGCAGCAGTGGGGAATATTGCACAATGGGCGCAAGCCTGATGCAGCAACGCCGCGTGAGGGATGACGGCCTTCGGGTTGTAAACCTCTTTTAGCAGGGAAGAAGCGTGA…	1361	Actinomycetota	Actinomycetia	Micrococcales	Microbacteriaceae	Microbacterium	Microbacterium zeae	2503	99.85	Microbacterium zeae	Microbacterium	179
L1-12CT-M	OM164289	N15	Control/Healthy Silks	L	CO448	T	27F	0	0	ACGGTGAAGCAAAGCTTGCTCTGTGGATCAGTGGCGAACGGGTGAGTAACACGTGAGCAACCTGCCCCTGACTCTGGGATAAGCGCTGGAAACGGCGTCTAATACTGGATATGAGCTGCGACCGCATGGTCAGCAGTTGGAAAGATTTTTCGGTCTGGGATGGGCTCACGGCCTATCAGCTTGTTGGTGAGGTAATGGCTCACCAAGGCGTCGACGGGTAGCCGGCCTGAGAGGGTGACCGGCCACACTGGGACTGAGACACGGCCCAGACTCCTACGGGAGGCAGCAGTGGGGAATATTGCACAATGGGCGAAAGCCTGATGCAGCAACGCCGCGTGAGGGATGACGGCCTTCGGGTTGTAAACCTCTTTTAGCAGGGAAGAAGCGAAAGTGACGGTA…	1352	Actinomycetota	Actinomycetia	Micrococcales	Microbacteriaceae	Microbacterium	Microbacterium oleivorans	2425	99.78	Microbacterium oleivorans	Microbacterium	183
L1-1CT-N	OM164290	N17	Control/Healthy Silks	L	CO449	T	27F	6	0.00425834	TGCAGTCGGANGGTAGCACAGAGAGCTTGCTCTCGGGTGACGAGTGGCGGACGGGTGAGTAATGTCTGGGGATCTGCCCGATAGAGGGGGATAACCACTGGAAACGGTGGCTAATACCGCATAACGTCTCAAGACCAAAGAGGGGGACCTTCGGGCCTCTCACTATCGGATGAACCCAGATGGGATTAGCTAGTAGGCGGGGTAATGGCCCACCTAGGCGACNATCCCTAGCTGGTCTGAGAGGATGACCAGCCACACTGGAACTGAGACACGGTCCANACTCCTACGGGAGGCAGCAGTGGGGAATATTGCACAATGGGCGCAAGCCTGATGCANCCATGCCGCGTGTATGAAGAANGCCTTCGGGTTGTAAAGTACTTTCAGCGGGGAGGAAGGCGA…	1409	Pseudomonadota	Gammaproteobacteria	Enterobacterales	Erwiniaceae	Pantoea	Pantoea agglomerans	2464	98.86	Pantoea agglomerans	Pantoea	245
L1-2CB-O	OM164292	N20	Control/Healthy Silks	L	CO441	B	27F	10	0.00708717	GTTGAGCGCTGANGNTGGTACTTGTACCAACTGGATGAGCAGCGAACGGGTGAGTAACGCGTGGGGAATCTGCCTTTGAGCGGGGGACAACATTTGGAAACGAATGCTAATACCGCATAAAAACTTTAAACACAAGTTTTAAGTTTGAAAGATGCAATTGCATCACTCAAAGATGATCCCGCGTTGTATTAGCTAGTTGGTGAGGTAAAGGCTCACCAAGGCGATGATACATAGCCGACCTGAGAGGGTGATCGGCCACATTGGGACTGAGACACGGCCCAAACTCCTACGGGAGGCAGCAGTAGGGAATCTTCGGCAATGGACGAAAGTCTGACCGAGCAACGCCGCGTGAGTGAAGAAGGTTTTCGGATCGTAAAACTCTGTTGGTAGAGAAGAACG…	1411	Bacillota	Bacilli	Lactobacillales	Streptococcaceae	Lactococcus	Lactococcus lactis	2540	98.94	Lactococcus lactis	Lactococcus	161
L1-1CT-M	OM241088	N29	Control/Healthy Silks	L	CO449	T	27F	44	0.0460251	AACGTATTCACCGTANCATTCTGATCTACGATTACTAGCGATTCCGACTTNNNNNNGTCGAGTTGCAGACTCCGATCCGGACTACGACGCACTTTATGAGGTCCGCTTGCTCTCGCGAGGTCGCTTCTCTTTGTATGCGCCATTGTAGCACGTGTGTAGCCCTGGCCGTAAGGGCCATGATGACTTGACGTCATCCCCACCTTCCTCCGGTTTATCACCGGCAGTCTCCTTTGAGTTCCCACCATTACGTGCTGGCAACAAAGGATAAGGGTTGCGCTCGTTGCGGGACTTAACCCAACATTTCACAACACGAGCTGACGACAGCCATGCAGCACCTGTCTCACGGTTCCCGAAGGCACTAAGGCATCTCTGCCAAATTCCGTGGATGTCAAGGCCAGG…	956	Pseudomonadota	Gammaproteobacteria	Enterobacterales	Erwiniaceae	0	0	1547	95.1	Erwinia aphidicola	Erwinia	92
P1-2CB-C	OM164303	N50	Control/Healthy Silks	P	CO441	B	799F	1	0.00137363	TACCTTGTTACGACTTAGTCCTAATTACCGATCCCACCTTCGACGGCTCCCTCCACAAGGGTTGGGCCACCGGCTTCAGGTGTTACCGACTTTCATGACTTGACGGGCGGTGTGTACAAGACCCGGGAACGTATTCACCGCAGCGTTGCTGATCTGCGATTACTAGCGACTCCGACTTCATGAGGTCGAGTTGCAGACCTCAATCCGAACTGGGACCGGCTTTTTGGGATTCGCTCCACCTTACGGTATTGCAGCCCTTTGTACCGGCCATTGTAGCATGCGTGAAGCCCAAGACATAAGGGGCATGATGATTTGACGTCATCCCCACCTTCCTCCGAGTTGACCCCGGCAGTATCCCATGAGTTCCCACCATTACGTGCTGGCAACATAGAACGAGGG…	728	Actinomycetota	Actinomycetia	Micrococcales	Microbacteriaceae	Microbacterium	Microbacterium testaceum	1301	99.59	Microbacterium testaceum	Microbacterium	190&191
P1-2CB-J	OM164304	N52	Control/Healthy Silks	P	CO441	B	799F	2	0.00282885	TTCACCCCAGTCGCTGACCCTACCGTGGTCGCCTGCCTCCTTGCGGTTGGCGCAGCGCCGTCGGGTAAGACCAACTCCCATGGTGTGACGGGCGGTGTGTACAAGGCCCGGGAACGTATTCACCGTGGCGTGCTGATCCACGATTACTAGCGATTCCGCCTTCATGCACCCGAGTTGCAGAGTGCAATCCGAACTGAGACGGCTTTTGGGGATTCGCTCCAGGTCGCCCCTTCGCTGCCCATTGTCACCGCCATTGTAGCACGTGTGTAGCCCATCCCGTAAGGGCCATGAGGACTTGACGTCATCCACACCTTCCTCGCGGCTTATCACCGGCAGTCTCCCCAGAGTGCCCAACCAAATGATGGCAACTAGGGACGTGGGTTGCGCTCGTTGCGGGAC…	707	Pseudomonadota	Alphaproteobacteria	Hyphomicrobiales	Methylobacteriaceae	Methylobacterium	0	1232	98.02	Methylobacterium aquaticum	Methylobacterium	172
P1-2CB-H	OM164305	N53	Control/Healthy Silks	P	CO441	B	799F	0	0	TTACGACTTAGTCCTAATTACCGATCCCACCTTCGACGGCTCCCTCCACAAGGGTTGGGCCACCGGCTTCAGGTGTTACCGACTTTCATGACTTGACGGGCGGTGTGTACAAGACCCGGGAACGTATTCACCGCAGCGTTGCTGATCTGCGATTACTAGCGACTCCGACTTCATGAGGTCGAGTTGCAGACCTCAATCCGAACTGGGACCGGCTTTTTGGGATTCGCTCCACCTTACGGTATTGCAGCCCTTTGTACCGGCCATTGTAGCATGCGTGAAGCCCAAGACATAAGGGGCATGATGATTTGACGTCATCCCCACCTTCCTCCGAGTTGACCCCGGCAGTATCCCATGAGTTCCCACCATTACGTGCTGGCAACATAGAACGAGGGTTGCGCT…	720	Actinomycetota	Actinomycetia	Micrococcales	Microbacteriaceae	Microbacterium	Microbacterium testaceum	1319	99.72	Microbacterium testaceum	Microbacterium	190&191
L1-11CB-I	OM164307	N60	Control/Healthy Silks	L	CO452	B	27F	37	0.0268895	TCGGACGGTAGCACAGAGGANCTTGCTCCTCGGGTGACGAGTGGCGGACGGGTGAGTAGTGTCNGGGGATCTGCCCGATAGAGGGGGATAACCACTGGAAACGGTGGCTAATACCGCATAACGTCGCAAGACCAAAGAGGGGGACCTTCGGGCCTCTCACTATCGGATGAACCCANATGGGATTAGCTAGTGNGNGGGGTAACGGCCCACCTANGCNACNATCCCTAGCTGGTCTGANAGGATGACCAGCCACACTGGAACTGANACACGGTCCACACTCCTACGGGANGCANCTGTGGGGAATATTGCACAGTGGGCGCAAGCCTGATGCACCCATGCCGCGTGTATGAANAGNGCCTTCGGGTTGTAAAGTACTTTCNGCGGGGAAGAANGCGATGT…	1376	Pseudomonadota	Gammaproteobacteria	Enterobacterales	Erwiniaceae	0	0	2241	95.71	Pantoea agglomerans	Pantoea	259
L1-11CB-B2	OM164315	N69	Control/Healthy Silks	L	CO452	B	799F	0	0	GTTACGACTTAGCCCTAGTTACCTGTTTTACCCTAGGCAGCTCCTTTTACGGTCACCGACTTCAGGTACCCCAGACTTCCATGGCTTGACGGGCGGTGTGTACAAGGCCCGGGAACGTATTCACCGCGCCATGGCTGATGCGCGATTACTAGCGATTCCAGCTTCATAGAGTCGAGTTGCAGACTCCAATCCGAACTGAGACAGGCTTTCGAGATTCGCATCACATCGCTGTGTAGCTGCCCTCTGTACCTGCCATTGTATTACGTGTGTGGCCCAAGGCGTAAGGGCCGTGATGATTTGACGTCATCCCCACCTTCCTCTCTACTTGCGTAGGCAGTCTTACTAGAGTCCTCAACTTAATGGTAGCAACTAGTAACAGGGGTTGCGCTCGTTGCAGGA…	698	Bacteroidota	Flavobacteriia	Flavobacteriales	Weeksellaceae	Chryseobacterium	Chryseobacterium daeguense	1256	99.14	Chryseobacterium daeguense	Chryseobacterium	44
L1-11CB-F	OM164316	N70	Control/Healthy Silks	L	CO452	B	799F	0	0	GACTTCACCCCAGTCGCTGAACCCACCGTGGTCGCCTGCTTCCCTTGCGGGTTGGCGCAACGCCTTCGGGTGAATCCAACTCCCATGGTGTGACGGGCGGTGTGTACAAGGCCTGGGAACGTATTCACCGCGGCATGCTGATCCGCGATTACTAGCGATTCCGCCTTCATGCTCTCGAGTTGCAGAGAACAATCCGAACTGAGACAACTTTTGGGGATTAGCTCGCCCTCGCAGGGTCGCTGCCCACTGTAGTTGCCATTGTAGCACGTGTGTAGCCCAGCGCGTAAGGGCCATGAGGACTTGACGTCATCCCCACCTTCCTCCGGCTTATCACCGGCGGTTCCTTTAGAGTACCCAACCAAATGATGGTAACTAAAGGCGAGGGTTGCGCTCGTTGCG…	706	Pseudomonadota	Alphaproteobacteria	Sphingomonadales	Sphingomonadaceae	Sphingomonas	Sphingomonas sanguinis	1284	99.57	Sphingomonas sanguinis	Sphingomonas	351
L1-4CB-D	OM164317	N72	Control/Healthy Silks	L	CO432	B	799F	2	0.0027894	TTACGACTTCACCCCAGTCATGAATCACAAAGTGGTAAGCGCCCTCCCGAAGGTTAAGCTACCTACTTCTTTTGCAACCCACTCCCATGGTGTGACGGGCGGTGTGTACAAGGCCCGGGAACGTATTCACCGTGGCATTCTGATCCACGATTACTAGCGATTCCGACTTCACGGAGTCGAGTTGCAGACTCCGATCCGGACTACGACGCACTTTGTGAGGTCCGCTTGCTCTCGCGAGGTCGCTTCTCTTTGTATGCGCCATTGTAGCACGTGTGTAGCCCTACTCGTAAGGGCCATGATGACTTGACGTCATCCCCACCTTCCTCCGGTTTATCACCGGCAGTCTCCTTTGAGTTCCCGACCGAATCGCTGGCAACAAAGGATAAGGGTTGCGCTCGT…	717	Pseudomonadota	Gammaproteobacteria	Enterobacterales	Erwiniaceae	0	0	1293	99.16	Pantoea anthophila	Pantoea	237&238
P1-4CB-I	OM164318	O02	Control/Healthy Silks	P	CO432	B	799F	0	0	TACGACTTCACCCCAGTCATCGGCCACACCGTGGCAAGCGCCCTCCCGAAGGTTAAGCTACCTGCTTCTGGTGCAACAAACTCCCATGGTGTGACGGGCGGTGTGTACAAGGCCCGGGAACGTATTCACCGCAGCAATGCTGATCTGCGATTACTAGCGATTCCGACTTCATGGAGTCGAGTTGCAGACTCCAATCCGGACTGAGATAGGGTTTCTGGGATTGGCTTACCGTCGCCGGCTTGCAGCCCTCTGTCCCTACCATTGTAGTACGTGTGTAGCCCTGGCCGTAAGGGCCATGATGACTTGACGTCATCCCCACCTTCCTCCGGTTTGTCACCGGCGGTCTCCTTAGAGTTCCCACCATTACGTGCTGGCAACTAAGGACAAGGGTTGCGCTCG…	721	Pseudomonadota	Gammaproteobacteria	Xanthomonadales	Xanthomonadaceae	0	0	1321	99.72	Stenotrophomonas pavanii	Stenotrophomonas	372&373&374&375
L1-11CB-G	OM164329	O17	Control/Healthy Silks	L	CO452	B	799F	3	0.00441176	GTCACTAGCCGTTGGATCCTTGAGATTTTAGTGGCGCAGCTAACGCATTAAGTTGACCGCCTGGGGAGTACGGCCGCAAGGTTAAAACTCAAATGAATTGACGGGGGCCCGCACAAGCGGTGGAGCATGTGGTTTAATTCGAAGCAACGCGAAGAACCTTACCAGGCCTTGACATGCAGAGAACTTTCCAGAGATGGATTGGTGCCTTCGGGAACTCTGACACAGGTGCTGCATGGCTGTCGTCAGCTCGTGTCGTGAGATGTTGGGTTAAGTCCCGTAACGAGCGCAACCCTTGTCCTTAGTTACCAGCACGTTATGGTGGGCACTCTAAGGAGACTGCCGGTGACAAACCGGAGGAAGGTGGGGATGACGTCAAGTCATCATGGCCCTTACGGCCTG…	680	Pseudomonadota	Gammaproteobacteria	Pseudomonadales	Pseudomonadaceae	Pseudomonas	0	1236	99.27	Pseudomonas (many)*	Pseudomonas	314&315&316&317
L1-4CB-F	OM262827	O21	Control/Healthy Silks	L	CO432	B	799F	3	0.00440529	CGACTTCACCCCAGTCATGAATCACAAAGTGGTAAGCGCCCTCCCGAAGGTTAAGCTACCTACTTCTTTTGCAACCCACTCCCATGGTGTGACGGGCGGTGTGTACAAGGCCCGGGAACGTATTCACCGTGGCATTCTGATCCACGATTACTAGCGATTCCGACTTCACGGAGTCGAGTTGCAGACTCCGATCCGGACTACGACGCACTTTGTGAGGTCCGCTTGCTCTCGCGAGGTCGCTTCTCTTTGTATGCGCCATTGTAGCACGTGTGTAGCCCTACTCGTAAGGGCCATGATGACTTGACGTCATCCCCACCTTCCTCCGGTTTATCACCGGCAGTCTCCTTTGAGTTCCCGCCATCACGCGCTGGCAACAAAGGATAAGGGTTGCGCTCGTTG…	681	Pseudomonadota	Gammaproteobacteria	Enterobacterales	Erwiniaceae	0	0	1183	98.53	Pantoea agglomerans	Pantoea	212
P1-19CB-A	OM164334	O25	Control/Healthy Silks	P	P9855HR	B	799F	0	0	TTACCTTGTTACGACTTCACCCCAGTCATCGGTCTTACCTTAGGAAGCGCCCTCCTTGCGGTTAGGCAACCTACTTCGGGTACTCCCAACTCCCGTGGTGTGACGGGCGGTGTGTACAAGGCCCGGGAACGTATTCACCGCGGCGTGCTGATCCGCGATTACTAGCGATTCCGACTTCATGTAGGCGAGTTGCAGCCTACAATCCGAACTGAGAATGGTTTTAAGAGATTAGCTAAACATCACTGTCTCGCGACTCGTTGTACCATCCATTGTAGCACGTGTGTAGCCCAGGTCATAAGGGGCATGATGATTTGACGTCATCCCCACCTTCCTCCGGTTTATCACCGGCAGTCTCGTTAGAGTGCCCAACTTAATGATGGCAACTAACAATAGGGGTTG…	725	Bacillota	Bacilli	Lactobacillales	Streptococcaceae	Lactococcus	Lactococcus lactis	1338	100	Lactococcus lactis	Lactococcus	158&161&159
P1-11CB-D	OM164335	O26	Control/Healthy Silks	P	CO452	B	799F	0	0	CGACTTCACCCCAGTCATCGGTCTTACCTTAGGAAGCGCCCTCCTTGCGGTTAGGCAACCTACTTTGGGTACTCCCAACTTCCGTGGTGTGACGGGCGGTGTGTACAAGGCCCGGGAACGTATTCACCGCGGCGTGCTGATCCGCGATTACTAGCGATTCCGACTTCATGCAGGCGAGTTGCAGCCTGCAATCCGAACTGAGAATGGTTTTAAGAGATTAGCGCACCCTCGCGGGTTGGCGACTCGTTGTACCATCCATTGTAGCACGTGTGTAGCCCAGGTCATAAGGGGCATGATGATTTGACGTCATCCCCACCTTCCTCCGGTTTATCACCGGCAGTCTCACTAGAGTGCCCAACTTAATGATGGCAACTAGTAATAAGGGTTGCGCTCGTTGCG…	691	Bacillota	Bacilli	Lactobacillales	Streptococcaceae	Lactococcus	Lactococcus garvieae	1277	100	Lactococcus garvieae	Lactococcus	157
L1-11CB-D	OM262829	O27	Control/Healthy Silks	L	CO452	B	799F	5	0.00696379	CGACTTCACCCCAGTCATGAATCACAAAGTGGTAAGCGCCCTCCCGAAGGTTAAGCTACCTACTTCTTTTGCAACCCACTCCCATGGTGTGACGGGCGGTGTGTACAAGGCCCGGGAACGTATTCACCGTGACATTCTGATTCACGATTACTAGCGATTCCGACTTCATGGAGTCGAGTTGCAGACTCCAATCCGGACTACGACGCACTTTATGAGGTCCGCTGGCTCTCGCGAGATNGCTTCTCTTTGTATGCGCCATTGTAGCACGTGTGTAGCCCTGGTCGTAAGGGCCATGATGACTTGACGTCATCCCCACCTTCCTCCAGTTTATCACTGGCAGTCTCCTTTGAGTTCCCGGCCTAACCGCTGGCAACAAAGGATAAGGGTTGCGCTCGTTGC…	718	Pseudomonadota	Gammaproteobacteria	Enterobacterales	Enterobacteriaceae	0	0	1267	98.33	Salmonella enterica/Atlantibacter hermannii*	Salmonella/ Atlantibacter	340&152
P1-4CB-B	OM164339	O31	Control/Healthy Silks	P	CO432	B	799F	5	0.00542299	TGTTCCCTTGAGGAGTGGCTTCCGGAGCTAACGCGTTAAGTCGACCGCCTGGGGAGTACGGCCGCAAGGTTAAAACTCAAATGAATTGACGGGGGCCCGCACAAGCGGTGGAGCATGTGGTTTAATTCGATGCAACGCGAAGAACCTTACCTACTCTTGACATCCAGAGAANTTGNCAGAGATGCTTTGGTGCCTTCGGGAACTCTGAGACAGGTGCTGCATGGCTGTCGTCAGCTCGTGTTGTGAAATGTTGGGTTAAGTCCCGCAACGAGCGCAACCCTTATCCTTTGTTGCCAGCGATTCGGTCGGGAACTCAAAGGAGACTGCCGGTGATAAACCGGAGGAAGGTGGGGATGACGTCAAGTCATCATGGCCCTTACGAGTAGGGCTACACACGTG…	649&273	Pseudomonadota	Gammaproteobacteria	Enterobacterales	Erwiniaceae	0	0	1181	99.38	Pantoea anthophila/ Pantoea ananatis	Pantoea	266&267&269&271&288&289&290&291&292&409&410&412
L1-4CB-M	OM241060	O41	Control/Healthy Silks	L	CO432	B	27F	11	0.0142487	CCTCCCGAAGGTTAAGCTACCTACTTCTTTTGCAACCCACTCCCATGGTGTGACGGGCGGTGTGTACAAGGCCCGGGAACGTATTCACCGTAGCATTCTGATCTACGATTACTAGCGATTCCGACTTCATGGAGTCGAGTTGCAGACTCCAATCCGGACTACGACGTACTTTATGAGGTCCGCTTGCTCTCGCGAGGTCGCTTCTCTTTGTATACGCCATTGTAGCACGTGTGTAGCCCTACTCGTAAGGGCCATGATGACTTGACGTCATCCCCACCTTCCTCCAGTTTATCACTGGCAGTCTCCTTTGAGTTCCCGGCCNAACCGCTGGCAACAAAGGATAAGGGTTGCGCTCGTTGCGGGACTTAACCCAACATTTCACAACACGAGCTGACGACA…	772	Pseudomonadota	Gammaproteobacteria	Enterobacterales	Enterobacteriaceae	0	0	1367	98.19	Leclercia adecarboxylata	Leclercia	166
L1-11CB-C	OM164347	O50	Control/Healthy Silks	L	CO452	B	27F	14	0.0101083	TGCNGCTGAGCGGTAGAGANCTTTCGGGATCTTGAGAGCGGCGTACGGGTGCGGAACACGTGTGCAACCTGCCTTTATCAGGGGGATAGCCTTTCGAAAGGAAGATTAATACCCCATAATATATTAAGTGGCATCATTTGATATTGAAAACTCCGGTGGATAGAGATGGGCANNCNCAAGATTAGATAGTTGGTGAGGTAACGGCTCACCAAGTCGATGATCTTTAGGGGGCCTGAGAGGGTGATCCCCCACACTGGTACTGAGACACGGACCAGACTCCTACGGGAGGCAGCAGTGAGGAATATTGGACAATGGGTTAGCGCCTGATCCAGCCATCCCGCGTGAAGGACGACGGCCCTATGGGTTGTAAACTTCTTTTGTACAGGGATAAACCTATTT…	1385	Bacteroidota	Flavobacteriia	Flavobacteriales	Weeksellaceae	Chryseobacterium	Chryseobacterium camelliae	2418	98.91	Chryseobacterium camelliae	Chryseobacterium	47
P1-11CB-K	OM164351	O57	Control/Healthy Silks	P	CO452	B	27F	8	0.00963855	TCCCCGGGCTTAACCTGGGAACTGCATTTGAAACTGGCACGCTTGACTCTCGTAGAGGGGGGTAGAATTCCAGTGTGTAGCGGTGAAATGCGTAGAGATCTGNGAAGAATACCGGTGGCGAAGNGCGGCCCCCTGGACGAAGACAGACGCTCAGGTGCGAAAGCGTGGGGAGCAAACAGGATTAGATACCCTGGTNGTNCACGCCGTAAACGATGTCGACTTGGAGGTTGTTCCCTTGAGGAGTGGCTTCCGGAGCTAACGCGTTAANTNGACCGCCTGGGGAGTACGGCCGCAAGGTTAAAACTCAAATGAATTGACGGGGGCCCGCACAAGCGGTGGAGCATGTGGTTTAATTCGATGCAACGCGAAGAACCTTACNTACTCTTGACATCCAGAGAA…	830	Pseudomonadota	Gammaproteobacteria	Enterobacterales	Erwiniaceae	0	0	1458	98.19	Pantoea ananatis	Pantoea	266&409
L1-4CB-B	OM240990	O58	Control/Healthy Silks	L	CO432	B	27F	40	0.0326797	two shorter sequences: GCTTGCTCTCGGGTGACGAGTGGCGGACGGGTGAGTAATGTCTGGGAAACTGCCTGATGGAGGGGGATAACTACTGGAAACGGTAGCTAATACCGCATAACGTCGCAAGACCAAAGAGGGGGACCTTCGGGCCTCTTGCCATCAGATGTGCCCAGATGGGATTAGCTAGTAGGTGGGGTAACGGCTCACCTAGGCGACGATCCCTAGCTGGTCTGAGAGGATGACCAGCCACACTGGAACTGAGACACGGTCCAGACTCCTACGGGAGGCAGCAGTGGGGAATATTGCACAATGGGCGCAAGCCTGATGCAGCCATGCCGCGTGTATGAAGAAGGCCTTCGGGTTGTAAAGTACTTTCAGCGGGGAGGAAGGTGTT…	709&515	unassigned	unassigned	unassigned	unassigned	0	0	1024/922	99.12/98.64	Kosakonia oryzendophytica/ Enterobacter cloacae/ Enterobacter ludwigii/ Klebsiella oxytoca/ Pantoea agglomerans	Kosakonia/ Enterobacter/ Klebsiella/ Pantoea	155
P1-4CB-G	OM164360	P02	Control/Healthy Silks	P	CO432	B	27F	3	0.0021645	GTAACAGGCCGCAAGGNNNTGACGAGTGGCGAACGGGTGAGTAATACATCGGAACGTGCCCGATCGTGGGGGATAACGCAGCGAAAGCTGTGCTAATACCGCATACGATCTACGGATGAAAGCGGGGGATCGCAAGACCTCGCGCGGACGGAGCGGCCGATGGCAGATTAGGTAGTTGGTGGGGTAAAGGCCTACCAAGCCGACGATCTGTAGCTGGTCTGAGAGGACGACCAGCCACACTGGGACTGAGACACGGCCCAGACTCCTACGGGAGGCAGCAGTGGGGAATTTTGGACAATGGGCGCAAGCCTGATCCAGCCATGCCGCGTGCAGGATGAAGGCCTTCGGGTTGTAAACTGCTTTTGTACGGAACGAAAAGGTTTCTTTTAATACAGGGAA…	1386	Pseudomonadota	Betaproteobacteria	Burkholderiales	Comamonadaceae	Pseudacidovorax	Pseudacidovorax intermedius	2467	99.57	Pseudacidovorax intermedius	Pseudacidovorax	301
P1-19CB-B	OM164363	P07	Control/Healthy Silks	P	P9855HR	B	27F	1	0.00120192	TCGGGCCTGCAGTGGGTACGGGCAGACTAGAGTGCGGTAGGGGAGATTGGAATTCCTGGTGTAGCGGTGGAATGCGCAGATATCAGGAGGAACACCGATGGCGAAGGCAGATCTCTGGGCCGTAACTGACGCTGAGGAGCGAAAGGGTGGGGAGCAAACAGGCTTAGATACCCTGGTAGTCCACCCCGTAAACGTTGGGAACTAGTTGTGGGGACCATTCCACGGTTTCCGTGACGCAGCTAACGCATTAAGTTCCCCGCCTGGGGAGTACGGCCGCAAGGCTAAAACTCAAAGGAATTGACGGGGACCCGCACAAGCGGCGGAGCATGCGGATTAATTCGATGCAACGCGAAGAACCTTACCAAGGCTTGACATATACGAGAACGGGCCAGAAATGGT…	832	Actinomycetota	Actinomycetia	Micrococcales	Microbacteriaceae	Microbacterium	Microbacterium testaceum	1500	99.16	Microbacterium testaceum	Microbacterium	174
L1-11CB-E	OM241059	P10	Control/Healthy Silks	L	CO452	B	27F	10	0.0169205	CCCTCCCGAAGGTTAAGCTACNNTACTTCTTTTGCAACCCACTCCCATGGTGTGACGGGCGGTGTGTACAAGGCCCGGGAACGTATTCACCGTGGCATTCTGATCCACGATTACTAGCGATTCCGACTTCACGGAGTCGAGTTGCAGACTCCGATCCGGACTACGACGCACTTTGTGAGGTCCGCTTGCTCTCGCGAGGTCGCTTCTCTTTGTATGCGCCATTGTAGCACGTGTGTAGCCCTACTCGTAAGGGCCATGATGACTTGACGTCATCCCCACCTTCCTCCGGTTTATCACCGGCAGTCTCCTTTGAGTTCCCGACCGAATCGCTGGCAACAAAGGATAAGGGTTGCGCTCGTTGCGGGACTTAACCCAACATTTCACAACACGAGCTGACGA…	591	Pseudomonadota	Gammaproteobacteria	Enterobacterales	Erwiniaceae	0	0	1018	98.14	Pantoea agglomerans	Pantoea	226&239
P1-11CB-A	OM164372	P28	Control/Healthy Silks	P	CO452	B	27F	3	0.00353357	AGATGTGAAATCCCCGCGCTTAACGTGGGAACTGCATTTGAAACTGGCAAGCTAGAGTCTTGTAGAGGGGGGTAGAATTCCAGGTGTAGCGGTGAAATGCGTAGAGATCTGGAGGANATACCGGTGGCGAAGGCGGCCCCCTGGACAAAGACTGACACTCAGGTGCGAAAGCGTGGGGAGCAAACAGGATTAGATACCCTGGTAGTCCACGCTGTAAACGATATCGACTTGGAGGTTGTGCCCTTGAGGCGTGGCTTCCGGAGCTAACGCGTTAAGTCGACCGCCTGGGGAGTACGGCCGCAAGGTTAAAACTCAAATGAATTGACGGGGGCCCGCACAAGCGGTGGAGCATGTGGTTTAATTCGATGCAACGCGAAGAACCTTACCTACTCTTGACAT…	849	Pseudomonadota	Gammaproteobacteria	Enterobacterales	Yersiniaceae	Serratia	0	1543	99.41	Serratia liquefaciens/ Serratia grimesii	Serratia	344
L1-19CB-B	OM164379	P47	Control/Healthy Silks	L	P9855HR	B	27F	3	0.00221566	ATGCAGTCGAGCGCCCCGCAAGNGGGAGCGGCAGACGGGTGAGTAACGCGTGGGAATCTACCCTGAACTGCGGAATAGCTCCGGGAAACTGGAATTAATACCGCATGTGCCCTGAGGGGCAAAGATTTATCGGTTCAGGATGAGCCCGCGTCCGATTAGCTAGTTGGTGGGGTAAAGGCCTACCAAGGCGACGATCGGTAGCTGGTCTAAGAGGATGATCAGCCACATTGGGACTGAGACACGGCCCAAACTCCTACGGGAGGCAGCAGTGGGGAATATTGGACAATGGGCGCAAGCCTGATCCAGCCATGCCGCGTGAGTGATGAAGGCCCTAGGGTTGTAAAGCTCTTTCAGTGGGGACGATAATGACGGTACCCACAGAAGAAGCCCCGGCTAACT…	1354	Pseudomonadota	Alphaproteobacteria	Hyphomicrobiales	Aurantimonadaceae	Aureimonas	Aureimonas ureilytica	2440	99.26	Aureimonas ureilytica	Aureimonas	34
P1-4CB-F	OM241031	P56	Control/Healthy Silks	P	CO432	B	27F	6	0.00816327	TAGCGCCCTCCCGAAGGTTAAGCTACCTACTTCTTTTGCAACCCACTCCCATGGTGTGACGGGCGGTGTGTACAAGGCCCGGGAACGTATTCACCGTGGCATTCTGATCCACGATTACTAGCGATTCCGACTTCACGGAGTCGAGTTGCAGACTCCGATCCGGACTACGACGCACTTTATGAGGTCCGCTTGCTCTCGCGAGGTCGCTTCTCTTTGTATGCGCCATTGTAGCACGTGTGTAGCCCTACTCGTAAGGGCCATGATGACTTGACGTCATCCCCACCTTCCTCCGGTTTATCACCGGCAGTCTCCTTTGAGTTCCCGACCGAATCGCTGGCAACAAAGGATAAGGGTTGCGCTCGTTGCGGGACTTAACCCAACATTTCACAACACGAGCTG…	735	Pseudomonadota	Gammaproteobacteria	Enterobacterales	Erwiniaceae	Pantoea	0	1325	99.05	Pantoea anthophila/ Pantoea ananatis	Pantoea	289&291&292
P1-11CB-H	OM164388	P63	Control/Healthy Silks	P	CO452	B	27F	63	0.0469449	AGTGTCGGACGGGTGAGTAATGTCTGGGGATCTGCCCGATAGAGGGGGATAACCNCTGGAAACGGTGGCNAATACCGCATAACGTCTCANGANCNAAGAGGGGGACCTTCTGGCCTCTCACTATCGGATGAACCCNGATGGGANTAGCTAGTATGCGGGGTAATGGCCCACCTAGGCGACNATCCCTANCTGGTCTGAGAGGANGACCNNCCCCACTGGAACTGAGACACGGTCCCNACTCNNACNGGAGGCNCCNCTGGGGAANATTGCACAATGGGCGCAAGCCTGATGCACCCCTGCCCCGTGTATGAAAAANGCGNTCTGGTTGTAAAGTANNTTCTCCGGGGAGGAAAGCGANNCGGTTAATAACCCCGTCTATTGACNTTTCCCGCACAAAAA…	1342	Pseudomonadota	Gammaproteobacteria	Enterobacterales	Erwiniaceae	0	0	1994	92.44	Pantoea conspicua	Pantoea	229
P1-19CB-C	OM164389	P65	Control/Healthy Silks	P	P9855HR	B	27F	3	0.00218818	ATGCAAGTCGAACGATGATCAGGAGCTTGCTCCTGTGATTAGTGGCGAACGGGTGAGTAACACGTGAGTAACCTGCCCCTGACTCTGGGATAAGCGTTGGAAACGACGTCTAATACTGGATATGATCACTGGTCGCATGGCCTGGTGGTGGAAAGATTTTTTGGTTGGGGATGGACTCGCGGCCTATCAGCTTGTTGGTGAGGTAATGGCTCACCAAGGCGACGACGGGTAGCCGGCCTGAGAGGGTGACCGGCCACACTGGGACTGAGACACGGCCCAGACTCCTACGGGAGGCAGCAGTGGGGAATATTGCACAATGGGCGAAAGCCTGATGCAGCAACGCCGCGTGAGGGATGACGGCCTTCGGGTTGTAAACCTCTTTTAGTAGGGAAGAAGGGA…	1371	Actinomycetota	Actinomycetia	Micrococcales	Microbacteriaceae	Curtobacterium	Curtobacterium herbarum	2503	99.56	Curtobacterium herbarum	Curtobacterium	57
L1-19CT-E	OM164397	Q13	Control/Healthy Silks	L	P9855HR	T	27F	3	0.00210379	AGTCGAGCGCAGGAAACTGACGGAACTCTTCGGAGGGAAGGCANTGGAATGAGCGGCGGACGGGTGAGTAACACGTAAGGAACCTGCCTCAAGGATTGGGATAACTCCGAGAAATCGGAGCTAATACCGGATAGTTCAACGGACCGCATGGTCCGCTGATGAAAGGCGCTTCGGCGTCACCTTGAGATGGCCTTGCGGTGCATTAGCTAGTTGGTGNGGTAACGGCCCACCAAGGCGACGATGCATAGCCGACCTGAGAGGGTGATCGGCCACACTGGGACTGAGACACGGCCCAGACTCCTACGGGAGGCAGCAGTAGGGAATCTTCCACAATGGACGAAAGTCTGATGGAGCAACGCCGCGTGAGTGATGAAGGTTTTCGGATCGTAAAACTCTGTT…	1426	Bacillota	Bacilli	Bacillales	Bacillaceae	Exiguobacterium	Exiguobacterium acetylicum	2608	99.65	Exiguobacterium acetylicum	Exiguobacterium	105
L1-17CT-E	OM164400	Q20	Control/Healthy Silks	L	P35837	T	27F	2	0.00149925	CCAGCTTGCTTGGTGGATCAGTGGCGAACGGGTGAGTAACACGTGAGCAACCTGCCCTGGACTCTGGGATAAGCGCTGGAAACGGCGTCTAATACTGGATATGAGACGTGATCGCATGGTCGTGTTTGGAAAGATTTTTTGGTCTGGGATGGGCTCGCGGCCTATCAGCTTGTTGGTGAGGTAATGGCTCACCAAGGCGTCGACGGGTAGCCGGCCTGAGAGGGTGACCGGCCACACTGGGACTGAGACACGGCCCAGACTCCTACGGGAGGCAGCAGTGGGGAATATTGCACAATGGGCGGAAGCCTGATGCAGCAACGCCGCGTGAGGGATGACGGCCTTCGGGTTGTAAACCTCTTTTAGCAGGGAAGAAGCGTAAGTGACGGTACCTGCAGAAAA…	1334	Actinomycetota	Actinomycetia	Micrococcales	Microbacteriaceae	Microbacterium	Microbacterium testaceum	2436	99.62	Microbacterium testaceum	Microbacterium	184
L1-19CT-K	OM164401	Q23	Control/Healthy Silks	L	P9855HR	T	27F	0	0	TGCAGTCGAACGGTGAAGCAGAGCTTGCTCTGTGGATCAGTGGCGAACGGGTGAGTAACACGTGAGCAACCTGCCCCTGACTCTGGGATAAGCGCTGGAAACGGCGTCTAATACTGGATATGAGCTGCGATCGCATGGTCAGCAGTTGGAAAGATTTTTCGGTCTGGGATGGGCTCACGGCCTATCAGCTTGTTGGTGAGGTAATGGCTCACCAAGGCGTCGACGGGTAGCCGGCCTGAGAGGGTGACCGGCCACACTGGGACTGAGACACGGCCCAGACTCCTACGGGAGGCAGCAGTGGGGAATATTGCACAATGGGCGAAAGCCTGATGCAGCAACGCCGCGTGAGGGATGACGGCCTTCGGGTTGTAAACCTCTTTTAGCAGGGAAGAAGCGAAA…	1381	Actinomycetota	Actinomycetia	Micrococcales	Microbacteriaceae	Microbacterium	Microbacterium oleivorans	2545	99.93	Microbacterium oleivorans	Microbacterium	189
P1-17CT-B	OM302470	Q25	Control/Healthy Silks	P	P35837	T	27F	4	0.00572246	two shorter sequences: AGCTTGCTCCTTGGGTGANGAGTGGCGGANGGGTGAGTAATGTCTGGGGATCTGCCCGATAGAGGGGGATAACCACTGGAAACGGTGGCTAATACCGCATAACGTCGCAAGACCAAAGAGGGGGACCTTCGGGCCTCTCACTATCGGATGAACCCAGATGGGATTAGCTAGTAGGCGGGGTAATGGCCCACCTAGGCGACGATCCCTAGCTGGTCTGAGAGGATGACCAGCCACACTGGAACTGAGACACGGTCCAGACTCCTACGGGAGGCAGCAGTGGGGAATATTGCACAATGGGCGCAAGCCTGATGCAGCCNTGCCNCGTGT / CTTCTTTTGCAACCCACTCCCATGGTGTGACGGGCGGTGTGTACAA…	327&372	Pseudomonadota	Gammaproteobacteria	Enterobacterales	Erwiniaceae	0	0	576/672	98.78/100	Pantoea agglomerans	Pantoea	225&226&227&228&230&401&402
P1-19CT-I	OM164414	Q55	Control/Healthy Silks	P	P9855HR	T	27F	8	0.00567376	CATGCAGTCGAACGGTAGCACAGAGAGCTTGCTCTCGGGTGACGAGTGGCGGACGGGTGAGTAATGTCTGGGAAACTGCCTGATGGAGGGGGATAACTACTGGAAACGGTAGCTAATACCGCATAACGTCGCAAGACCAAAGAGGGGGACCTTCGGGCCTCTTGCCATCAGATGTGCCCAGATGGGATTAGCTAGTAGGTGGGGTAACGGCTCACCTAGGCGACGATCCCTAGCTGGTCTGAGAGGATGACCAGCCACACTGGAACTGAGACACGGTCCAGACTCCTACGGGAGGCAGCAGTGGGGAATATTGCACAATGGGCGCAAGCCTGATGCAGCCATGCCGCGTGTATGAAGAAGGCCTTCGGGTTGTAAAGTACTTTCAGCGGGGAGGAAGGN…	1410	Pseudomonadota	Gammaproteobacteria	Enterobacterales	Enterobacteriaceae	Klebsiella	Klebsiella grimontii	2540	99.01	Klebsiella grimontii	Klebsiella	135
L1-17CT-H	OM164422	R02	Control/Healthy Silks	L	P35837	T	27F	2	0.00145349	AGTCGAGCGGTAAGGNCCTTCGGGGTACACGAGCGGCGAACGGGTGAGTAACACGTGAGCAATCTGCCCTTCTCTTTGGAATAACCATTGGAAACGATGGCTAATGCCGAATATGAACCCCTTTCGCATGTTGGGGGTTGGAAAGCTCCGGCGGAGAAGGATGAGCTCGCGGCCTATCAGCTTGTTGGTGAGGTAATGGCTCACCAAGGCATTGACGGGTAGCCGGCCTGAGAGGGTGACCGGCCACACTGGGACTGAGACACGGCCCAGACTCCTACGGGAGGCAGCAGTGGGGAATATTGGACAATGGGCGAAAGCCTGATCCAGCAACGCCGCGTGAGGGATGACGGCCTTCGGGTTGTAAACCTCTTTCAGCAGGGACGAAGCGAGAGTGACGGT…	1376	Actinomycetota	Actinomycetia	Propionibacteriales	Nocardioidaceae	Aeromicrobium	Aeromicrobium fastidiosum	2488	99.27	Aeromicrobium fastidiosum	Aeromicrobium	11
P1-18CT-E	OM302471	R31	Control/Healthy Silks	P	P38157	T	27F	26	0.0359116	two shorter sequences: AGTCGAACGCCCCGCAAGGGGAGTGGCAGACGGGTGAGTAACGCGTGGGAATCTACCGTGCCCTGCGGAATAGCTCCGGGAAACTGGAATTAATACCGCATACGCCCTACGGGGGNNNGANTTATCGGGGTATGATGAGCCCGCGTTGGATTAGCTAGTTGGTGGGGTAAAGGCCTACCAAGGCGACGATCCATAGNNNGTCTGAGAGGATGATCAGCCNCNTTGGGACTGAGACACGGCCNANNNTCCTANGGGAGGCANCNNTGGGGAATATTGGACAATGGGCGCA / AGCTGCCTCCTTGCGGTTAGCGCACTACCTTCGGGTAAAACCAACTCCCATGGTGTGACGGGCGGTGTGTACAAGGCCCGGGAA…	289&435	Pseudomonadota	Alphaproteobacteria	Hyphomicrobiales	Rhizobiaceae	0	0	460/765	93.43/97.70	Rhizobium nepotum/// Agrobacterium fabrum/ Agrobacterium tumefaciens/ Rhizobium nepotum/ Rhizobium pusense	Rhizobium/ Agrobacterium	331
P1-17CT-C	OM164430	R36	Control/Healthy Silks	P	P35837	T	27F	3	0.00217391	TACATGCAAGTCANACGGGTAGCAATACCAGTGGCGTACGGGTGCGTAACGCGTATGCAACCTACCTTTCACAGGAGGACAACAGCGGGAAACTGCTGCTAATACTCCGTATTACTTTAATGCGGCATCGTGTTGAAGTGAAAGAAGCAATTTGGTGAGAGATGGGCATGCGTTCGATTAGCTAGTTGGTGCGGGTAACGGCCCACCAAGGCGACGATCGATAGGGGCTCTGAGAGGAGAATCCCCCACACTGGCACTGAGATACGGGCCAGACTCCTACGGGAGGCAGCAGTAGGGAATATTGGGCAATGGAGGGAACTCTGACCCAGCCATGCCGCGTGCAGGAAGAAGGCCCTCTGGGTTGTAAACTGCTTTTGATAGGGAAGAAAGAGGTTATGC…	1380	Bacteroidota	Cytophagia	Cytophagales	Spirosomaceae	0	0	2200	96.35	Siphonobacter aquaeclarae	Siphonobacter	346
L1-18CT-D	MT777222	R56	Control/Healthy Silks	L	P38157	T	27F	8	0.00587372	GGGAGCTTGCTCCTCGGGTGACGAGTGGCGGACGGGTGAGTAATGTCTGGGGATCTGCCCGATAGAGGGGGATAACCACTGGAAACGGTGGCTAATACCGCATAACGTCGCAAGACCAAAGAGGGGGACCTTCGGGCCTCTCACTATCGGATGAACCCAGATGGGATTAGCTAGTAGGCGGGGTAACGGCCCACCTAGGCGACGATCCCTAGCTGGTCTGAGAGGATGACCAGCCACACTGGAACTGAGACACGGTCCAGACTCCTACGGGAGGCAGCAGTGGGGAATATTGCACAATGGGCGCAAGCCTGATGCAGCCATGCCGCGTGTATGAAGAAGGCCTTCGGGTTGTAAAGTACTTTCAGCGGGGAGGAAGGCGATGTGGTTAATAACCGCATT…	1362	Pseudomonadota	Gammaproteobacteria	Enterobacterales	Erwiniaceae	0	0	2459	99.19	Pantoea ananatis	Pantoea	264&274&411
L1-18CT-B	OM241087	R59	Control/Healthy Silks	L	P38157	T	27F	18	0.0178749	GTTAAGCTACCTGCTTCTGGTGCAACAAACTCCCATGGTGTGACGGGCGGTGTGTACAAGGCCCGGGAACGTATTCACCGCAGCAATGCTGATCTGCGATTACTAGCGATTCCGACTTCATGGAGTCGAGTTGCAGACTCCAATCCGGACTGAGATAGGGTTTCTGGGATTGGCTTACCGTCGCCGGCTTGCAGCCCTCTGTCCCTACCATTGTAGTACGTGTGTAGCCCTGGCCGTAAGGGCCATGATGACTTGACGTCATCCCCACCTTCCTCCGGTTTGTCACCGGCGGTCTCCTTAGAGTTCCCACCATTACGTGCTGGCAACTAAGGACAAGGGTTGCGCTCGTTGCGGGACTTAACCCAACATCTCACGACACGAGCTGACGACAGCCATGCA…	1007	Pseudomonadota	Gammaproteobacteria	Xanthomonadales	Xanthomonadaceae	0	0	1773	97.82	Stenotrophomonas pavanii	Stenotrophomonas	374&375
L1-2CB-A	OM241057	R62	Control/Healthy Silks	L	CO441	B	27F	4	0.00496278	CCCTCCCGAAGGTTAAGCTACCTACTTCTTTTGCAACCCACTCCCATGGTGTGACGGGCGGTGTGTACAAGGCCCGGGAACGTATTCACCGTGGCATTCTGATCCACGATTACTAGCGATTCCGACTTCACGGAGTCGAGTTGCAGACTCCGATCCGGACTACGACGCACTTTGTGAGGTCCGCTTGCTCTCGCGAGGTCGCTTCTCTTTGTATGCGCCATTGTAGCACGTGTGTAGCCCTACTCGTAAGGGCCATGATGACTTGACGTCATCCCCACCTTCCTCCGGTTTATCACCGGCAGTCTCCTTTGAGTTCCCGCCATCACGCGCTGGCAACAAAGGATAAGGGTTGCGCTCGTTGCGGGACTTAACCCAACATTTCACAACACGAGCTGACGA…	806	Pseudomonadota	Gammaproteobacteria	Enterobacterales	Erwiniaceae	Pantoea	Pantoea eucalypti	1458	99.38	Pantoea eucalypti	Pantoea	217
L1-6CB-E	OM164441	R64	Control/Healthy Silks	L	CO430	B	27F	9	0.00636042	TGCANTCGAGCGGTAGCACANGGAGCTTGCTCCTGGGTGACGAGCGGCGGACGGGTGAGTAATGTCTGGGAAACTGCCTGATGGAGGGGGATAACTACTGGAAACGGTAGCTAATACCGCATAACGTCGCAAGACCAAAGAGGGGGACCTTCGGGCCTCTTGCCATCAGATGTGCCCAGATGGGATTAGCTAGTAGGTGGGGTAACGGCTCACCTAGGCGACGATCCCTAGCTGGTCTGAGAGGATGACCAGCCACACTGGAACTGAGACACGGTCCAGACTCCTACGGGAGGCAGCAGTGGGGAATATTGCACAATGGGCGCAAGCCTGATGCAGCCATGCCGCGTGTATGAAGAAGGCCTTCGGGTTGTAAAGTACTTTCAGCGGGGAGGAAGGTGT…	1415	Pseudomonadota	Gammaproteobacteria	Enterobacterales	Enterobacteriaceae	0	0	2484	98.51	Enterobacter ludwigii	Enterobacter	77
L1-12CT-D	OM302491	R68	Control/Healthy Silks	L	CO448	T	27F	8	0.0143113	ACTTCTTTTGCAACCCACTCCCATGGTGTGACGGGCGGTGTGTACAAGGCCCGGGAACGTATTCACCGTGGCATTCTGATCCACGATTACTAGCGATTCCGACTTCACGGAGTCGAGTTGCAGACTCCGATCCGGACTACGACGCACTTTATGAGGTCCGCTTGCTCTCGCGAGGTCGCTTCTCTTTGTATGCGCCATTGTAGCACGTGTGTAGCCCTACTCGTAAGGGCCATGATGACTTGACGTCATCCCCACCTTCCTCCGGTTTATCACCGGCAGTCTCCTTTGAGTTCCCGACCGAATCGCTGGCAACAAAGGATAAGGGTTGCGCTCGTTGCGGGACTTAACCCAACATTTCACAACACGAGCTGACGACAGCCATGCAGCACCTGTCTCAGA…	559	Pseudomonadota	Gammaproteobacteria	Enterobacterales	Erwiniaceae	0	0	1020	97.82	Pantoea ananatis	Pantoea	292&291&289&282&269&409&410&411
L1-12CT-I	OM164445	R71	Control/Healthy Silks	L	CO448	T	27F	6	0.00431034	GGTAGCACAGANAGCTTGCTCTTGGGTGACNAGTGGCGGACGGGTGAGTAATGTCTGGGGATCTGCCCGATAGAGGGGGATAACCACTGGAAACGGTGGCTAATACCGCATAACGTCTCAAGACCAAAGAGGGGGACCTTCGGGCCTCTCACTATCGGATGAACCCAGATGGGATTAGCTAGTAGGCGGGGTAATGGCCCACCTAGGCGACNATCCCTAGCTGGTCTGAGAGGATGACCAGCCACACTGGAACTGAGACACGGTCCAGACTCCTACGGGAGGCAGCAGTGGGGAATATTGCACAATGGGCGCAAGCCTGATGCACCCATGCCGCGTGTATGAAGAAGGCCTTCGGGTTGTAAAGTACTTTCAGCGGGGAGGAAGGCGACNGGGTTAATA…	1392	Pseudomonadota	Gammaproteobacteria	Enterobacterales	Erwiniaceae	Pantoea	Pantoea agglomerans	2438	98.92	Pantoea agglomerans	Pantoea	224
L1-1CT-F	OM164448	R77	Control/Healthy Silks	L	CO449	T	27F	37	0.0266571	TGCAGTCGGACGGTAGCACANAGGAGCTTGCTCCTCGGGTGANGAGTGGCGGAGGGGTGANTAGTGTCGGGGGATCTGCCCGATAGAGGGGGATAACCACTGGAAACGGTGGCTAATACCGCATAACGTCNCNAGACCAAANAGGGGGACCTTCGGGCCTCTCACTATCGGATGAACCCANNNGGGATTAGCTAGTGCGCGGGGTAACGGCCCACCTANGCNACNATCCCTAGCGGGTCAGAGAAGATGACCAGCCACACTGGAACTGANACACGGTCCACACTCCTACGGGANGCANCTGTGGGGAATATTGCACAGTGGGCGCACGCCTGATGCANCCATGCCGCGTGTATGAANAGNGCCTTCGGGTTGTAAAGTACTTTCCGCGGGGAAGAGNGC…	1388	Pseudomonadota	Gammaproteobacteria	Enterobacterales	Erwiniaceae	0	0	2213	94.74	Pantoea agglomerans	Pantoea	251
L1-12CT-E	OM240972	S07	Control/Healthy Silks	L	CO448	T	27F	17	0.0174359	Two sequences, but forward sequence was used for taxonomy: ATGCAGTCGAACGGTAGCACAGAGAGCTTGCTCTCGGGTGACGAGTGGCGGACGGGTGAGTAATGTCTGGGAAACTGCCTGATGGAGGGGGATAACTACTGGAAACGGTAGCTAATACCGCATAACGTCGCAAGACCAAAGAGGGGGACCTTCGGGCCTCTTGCCATCAGATGTGCCCAGATGGGATTAGCTAGTAGGTGGGGTAATGGCTCACCTAGGCGACGATCCCTAGCTGGTCTGAGAGGATGACCAGCCACACTGGAACTGAGACACGGTCCAGACTCCTACGGGAGGCAGCAGTGGGGAATATTGCACAATGGGCGCAAGCCTGATGCAGCCA…	499&476	Pseudomonadota	Gammaproteobacteria	Enterobacterales	Enterobacteriaceae	0	0	879	99	Leclercia adecarboxylata	Leclercia	168
P1-1CT-F	OM164452	S12	Control/Healthy Silks	P	CO449	T	27F	52	0.0366197	TGCAGTCGGANGGTAGCACANANGANCTTGCTCCTCGGGTGANNAGTGGCAGAGGGGTGANTAATGTCTGGGGATCTGCCCGATAGAGGGGGATAACCACTGGAAACGGTGGCTAATACCGCATAACNTCNCNAGACCAAAGAGGGGGACCTTCGGGCCTCTCACTATCNGATGAACCCANAGGGGATTAGCTNGTANGCGGGGTAACGGCCCACCTACGCNACNATCCCTANCGGGTCTGANAAGATGACCNNCCACNCTGGAACTGANACACGGTCCACACTCCTAGGGGANGCANCTGTGGGGAATATTGCACAGTGGGCGCACGCCTGATGCANCCATGCCGCGTGTAAGAANAGNGCCTTCGGGTTGTAAANTACTTTCAGCGGGGAAGAAGGC…	1420	Pseudomonadota	Gammaproteobacteria	Enterobacterales	Erwiniaceae	0	0	2246	94.16	Pantoea agglomerans	Pantoea	252
L1-6CB-D	OM164456	S22	Control/Healthy Silks	L	CO430	B	27F	9	0.00682335	AGTTAGTGGCGGACGGGTGAGTAACACGTGGGAACGTGCCTTTAGGTTCGGAATAACTCAGGGAAACTTGTGCTAATACCGAATGTGCCCTTCGGGGGAAAGATTTATCGCCTTTAGAGCGGCCCGCGTCTGATTAGCTAGTTGGTGAGGTAAAGGCTCACCAAGGCGACGATCAGTAGCTGGTCTGAGAGGATGATCAGCCACATTGGGACTGAGACACGGCCCAAACTCCTACGGGAGGCAGCAGTGGGGAATCTTGCGCAATGGGCGAAAGCCTGACGCAGCCATGCCGCGTGAATGATGAAGGTCTTAGGATTGTAAAATTCTTTCACCGGGGACGATAATGACGGTACCCGGAGAAGAAGCCCCGGCTAACTTCGTGCCANCAGCCGCGGTAAT…	1319	Pseudomonadota	Alphaproteobacteria	Caulobacterales	Caulobacteraceae	Brevundimonas	0	2351	98.94	Brevundimonas vesicularis	Brevundimonas	38
P1-1CT-L	OM164458	S25	Control/Healthy Silks	P	CO449	T	27F	4	0.00282885	CATGCAGTCGAACGGTAGCACAGAGGAGCTTGCTCNTNGGGTGACGAGTGGCGGACGGGTGAGTAATGTCTGGGGATCTGCCCGATGGAGGGGGATAACCACTGGAAACGGTGGCTAATACCGCATAACGTCGCAAGACCAAAGTGGGGGACCTTCGGGCCTCACACCATCGGATGAACCCAGATGGGATTAGCTAGTAGGTGGGGTAACGGCTCACCTAGGCGACGATCCCTAGCTGGTCTGAGAGGATGACCAGCCACACTGGAACTGAGACACGGTCCAGACTCCTACGGGAGGCAGCAGTGGGGAATATTGCACAATGGGCGCAAGCCTGATGCAGCCATGCCGCGTGTATGAAGAAGGCCTTCGGGTTGTAAAGTACTTTCAGCGGGGAGGAAG…	1414	Pseudomonadota	Gammaproteobacteria	Enterobacterales	Erwiniaceae	Pantoea	Pantoea agglomerans	2468	98.29	Pantoea agglomerans	Pantoea	210
L1-6CB-J	OM164459	S28	Control/Healthy Silks	L	CO430	B	27F	1	0.000736377	TGCAGTCGCACGGGCAGCAATGTCAGTGGCGGACGGGTGAGTACCGCGTAGGAATGTGTCCAGAGGTGGGGGACAACCTTGGGAAACTGAGGCTAATACCGCATATGAGCTGAGGCTCAAAGCAGCGATGCGCCTTTGGAGTAGCCTGCGTCCGATTAGCTAGTTGGTGGGGTAAAGGCCTACCAAGGCGACGATCGGTAGCTGGTCTGAGAGGACGACCAGCCACACTGGGACTGAGACACGGCCCAGACTCCTACGGGAGGCAGCAGTGGGGAATATTGGACAATGGGCGCAAGCCTGATCCAGCAATGCCGCGTGTGTGAAGAAGGTCTTCGGATCGTNAAAGCACTTTCGACGGGGACGATGATGACGGTACCCGTAGAAGAAGCCCCGGCTAAC…	1358	Pseudomonadota	Alphaproteobacteria	Rhodospirillales	Acetobacteraceae	Roseomonas	0	2303	97.28	Roseomonas aerofrigidensis	Roseomonas	338
P1-1CT-C	OM241014	S31	Control/Healthy Silks	P	CO449	T	27F	24	0.0380349	TCTTTTAGCACCCACTCCCNTGGTGTGACGGGCGGTGTGTACAAGGCCCGGGAACGTATTCACCGTGGCATTCTGATCCACGATTACAAGCGATTCCGACTTCACGGAGTCGAGTTGCAGACTCCGATCCGGACTACGACGCACTTTATGAGGTCCGCTTGCTCTCGCGAGGTCGCTTCNCTTTGTATGCGCCATTGTAGCACGTGTGTAGCCCTACTCGTAAGGGCCATGATGACTTGACGTCATCCCCANNNTCCTCCGGTTTATCACCGGCAGTCTCCTTTGAGTTCCCGACCGAATCGCTGGCAACAAAGGATAAGGGTTGCGCTCGTTGCGGGACTTAACCCAACATTTCACAACACGAGCTGACNACAGCCATGCAGCAACNGTCTCANAGTT…	879&631	Pseudomonadota	Gammaproteobacteria	Enterobacterales	Erwiniaceae	0	0	1010	95.08	Pantoea agglomerans	Pantoea	206
P1-1CT-A	OM164467	S44	Control/Healthy Silks	P	CO449	T	27F	3	0.00214286	ACGGTAGCACANAGAAGCTTGCTTCTTGGGTGACGAGTGGCGGACGGGTGAGTAATGTCTGGGAAACTGCCCGATGGAGGGGGATAACTACTGGAAACGGTAGCTAATACCGCATAACGTCTTCGGACCAAAGTGGGGGACCTTCGGGCCTCACGCCATCGGATGTGCCCAGATGGGATTAGCTAGTAGGTGGGGTAACGGCTCACCTAGGCGACGATCCCTAGCTGGTCTGAGAGGATGACCAGCCACACTGGAACTGAGACACGGTCCAGACTCCTACGGGAGGCAGCAGTGGGGAATATTGCACAATGGGCGCAAGCCTGATGCAGCCATGCCGCGTGTATGAAGAAGGCCTTCGGGTTGTAAAGTACTTTCAGCGGGGAGGAAGGCGACGCGGTT…	1400	Pseudomonadota	Gammaproteobacteria	Enterobacterales	Erwiniaceae	Erwinia	Erwinia tasmaniensis	2488	98.79	Erwinia tasmaniensis	Erwinia	89
P1-6CB-A	OM164472	S57	Control/Healthy Silks	P	CO430	B	27F	26	0.0191458	CTTGCTCCTCGGGTGANGAGTGGCGGAGGGGTGAGTAGTGTCNGGGGATCTGCCCGATAGAGGGGGATAACCACTGGAAACGGTGGCTAATACCGCATAACGTCGCAAGACCAAAGAGGGGGACCTTCGGGCCTCTCACTATCGGATGAACCCANATGGGATTAGCTANTANGCGGGGTANCGGCCCACCTANGCGACNATCCCTAGCGGGTCTGAGAAGATGACCANCCACACTGGAACTGANACACGGTCCACACTCCTACGGGAGGCANCTGTGGGGAATATTGCACAATGGGCGCAAGCCTGATGCACCCATGCCGCGTGTATGAANAANGCCTTCGGGTTGTAAAGTACTTTCNGCGGGGAAGAANGCNATGTGGTTAATAACCNCCTTGATTG…	1358	Pseudomonadota	Gammaproteobacteria	Enterobacterales	Erwiniaceae	Pantoea	Pantoea ananatis	2300	96.76	Pantoea ananatis	Pantoea	283
P1-2CB-F	OM164473	S60	Control/Healthy Silks	P	CO441	B	27F	20	0.0144823	TGCAAGTCGGACGGTAGCACAAANANCTTGCTCNCNGGTGACNAGTGTCGGANGGGTGAGTAATGTCTGGGGATCTGCCCGATAGAGGGGGATAACCACTGGAAACGGTGGCTAATACCGCATAACGTCTCAAGACCNAAGAGGGGGACCTTCTGGCCTCTCACTATCGGATGAACCCNGATGGGANTNGCTAGTATGCGGGGTANNGGCCCACCTAGGCGACNATCCCTAGCTGGTCTGAGAGGATGACCANCCCCACTGGAACTGAGACACGGTCCANACTCCTACGGGAGGCGNCNCTGGGGAATATTGCGCAATGGGCGCAAGCCTGATGCACCCCTGCCCCGTGTATGAAAAANGCCTTCTGGTTGTAAAGTACTTTCTCCGGGGANGGAAAGC…	1381	Pseudomonadota	Gammaproteobacteria	Enterobacterales	Erwiniaceae	0	0	2300	96.31	Pantoea ananatis	Pantoea	282
L1-6CB-L	OM164476	S64	Control/Healthy Silks	L	CO430	B	27F	19	0.0134847	TCGGACGGTAGCACAGAGGAGCTTGCTCCTCGGGTGACGAGTGGCGGAGGGGTGAGTANTGTCNGGGGATCTGCCCGATAGAGGGGGATAACCACTGGAAACGGTGGCTAATACCGCATAACGTCGCAAGACCAAAGAGGGGGACCTTCGGGCCTCTCACTATCGGATGAACCCANATGGGATTAGCTAGTGNGCGGGGTAACGGCCCACCTANGCNACNATCCCTAGCTGGTCTGAGAAGATGACCANCCACACTGGAACTGANACACGGTCCACACTCCTACGGGANGCANCTGTGGGGAATATTGCACAGTGGGCGCAAGCCTGATGCACCCATGCCGCGTGTATGAANAANGCCTTCGGGTTGTAAAGTACTTTCCGCGGGGAAGAAGGCGATGT…	1409	Pseudomonadota	Gammaproteobacteria	Enterobacterales	Erwiniaceae	0	0	2407	97.23	Pantoea ananatis	Pantoea	286
L1-11CT-C	OM241073	S72	Control/Healthy Silks	L	CO452	T	27F	19	0.0269504	CTTCTTTTGCAACCCACTCCCATGGTGTGACGGGCGGTGTGTACAAGGCCCGGGAACGTATTCACCGTGGCATTCTGATCCACGATTACTAGCGATTCCGACTTCACGGAGTCGAGTTGCAGACTCCGATCCGGACTACGACGCACTTTGTGAGGTCCGCTTGCTCTCGCGAGGTCGCTTCTCTTTGTATGCGCCATTGTAGCACGTGTGTAGCCCTACTCGTAAGGGCCATGATGACTTGACGTCATCCCCACCTTCCTCCGGTTTATCACCGGCAGTCTCCTTTGAGTTCCCGACCGAATCGCTGGCAACAAAGGATAAGGGTTGCGCTCGTTGCGGGACTTAACCCAACATTTCACAACACGAGCTGACGACAGCCATGCAGCACCTGTCTCACGG…	705	Pseudomonadota	Gammaproteobacteria	Enterobacterales	Erwiniaceae	Pantoea	Pantoea agglomerans	1204	97.3	Pantoea agglomerans	Pantoea	244&245&246&402
L1-12CT-K	OM302486	T02	Control/Healthy Silks	L	CO448	T	27F	21	0.0288462	two shorter sequences: AGAGTGGCANACGGGTGAGTAACGCGTGGGAACATACCCTTTTCTACGGAATAGCTCTGGGAAACTGGAATTAATACCGTATACGCCCTACGGGGGAAAGATTTATCGGGGAAGGATTGGCCCGCGTTGGATTAGCTAGTTGGTGGGGTAAAGGCCTACCAAGGCGACGATCCATAGCTGGTCTGAGAGGATGATCAGCCACATTGGGACTGAGACACGGCCCAAACTCCTACGGGAGGCAGCAGTGGGGAATATTGGACAATGGGCGCANGCCTGATCCAGCCATGCCGCGTGNGTGATGAAGGCCTTAGGGTTGTAAAGCTCTTTCACCNANGAAGATAATGACGGTAGTCGGANAAGAAGCCCCGGCNAACTT…	406&322	Pseudomonadota	Alphaproteobacteria	Hyphomicrobiales	Rhizobiaceae	0	0	682/530	97.05/95.96	Agrobacterium larrymoorei	Agrobacterium	12&13&14&390&391&393
P1-1CT-J	OM241055	T04	Control/Healthy Silks	P	CO449	T	27F	3	0.00359712	CCCTCCCGAAGGNTAAGCTACCTACTTCTTTTGCAACCCACTCCCATGGTGTGACGGGCGGTGTGTACAAGGCCCGGGAACGTATTCACCGTGGCATTCTGATCCACGATTACTAGCGATTCCGACTTCACGGAGTCGAGTTGCAGACTCCGATCCGGACTACGACGCACTTTATGAGGTCCGCTTGCTCTCGCGAGGTCGCTTCTCTTTGTATGCGCCATTGTAGCACGTGTGTAGCCCTACTCGTAAGGGCCATGATGACTTGACGTCATCCCCACCTTCCTCCGGTTTATCACCGGCAGTCTCCTTTGAGTTCCCGACCGAATCGCTGGCAACAAAGGATAAGGGTTGCGCTCGTTGCGGGACTTAACCCAACATTTCACAACACGAGCTGACGAC…	834	Pseudomonadota	Gammaproteobacteria	Enterobacterales	Erwiniaceae	0	0	1476	99.16	Pantoea agglomerans	Pantoea	253
L1-2CB-J	OM164481	T10	Control/Healthy Silks	L	CO441	B	27F	3	0.002149	TGCAGTCGAACGGTGAACACGGAGCTTGCTCTGTGGGATCAGTGGCGAACGGGTGAGTAACACGTGAGCAACCTGCCCCTGACTCTGGGATAAGCGCTGGAAACGGCGTCTAATACTGGATACGAGTAGCGGCCGCATGGTCAGTTACTGGAAAGATTTATTGGTTGGGGATGGGCTCGCGGCCTATCAGCTTGTTGGTGAGGTAATGGCTCACCAAGGCGTCGACGGGTAGCCGGCCTGAGAGGGTGACCGGCCACACTGGGACTGAGACACGGCCCAGACTCCTACGGGAGGCAGCAGTGGGGAATATTGCACAATGGGCGGAAGCCTGATGCAGCAACGCCGCGTGAGGGATGACGGCCTTCGGGTTGTAAACCTCTTTTAGCAGGGAAGAAGCGA…	1396	Actinomycetota	Actinomycetia	Micrococcales	Microbacteriaceae	Microbacterium	Microbacterium foliorum	2556	99.71	Microbacterium foliorum	Microbacterium	188
L1-11CT-D	OM164486	T18	Control/Healthy Silks	L	CO452	T	27F	1	0.000718391	TGCAGTCGAACGGTGAAGCCAAGCTTGCTTGGTGGATCAGTGGCGAACGGGTGAGTAACACGTGAGCAACCTGCCCTGGACTCTGGGATAAGCGCTGGAAACGGTGTCTAATACTGGATATGAGACGTGATCGCATGGTCGTGTTTGGAAAGATTTTTCGGTCTGGGATGGGCTCGCGGCCTATCAGCTTGTTGGTGAGGTAATGGCTCACCAAGGCGTCGACGGGTAGCCGGCCTGAGAGGGTGACCGGCCACACTGGGACTGAGACACGGCCCAGACTCCTACGGGAGGCAGCAGTGGGGAATATTGCACAATGGGCGAAAGCCTGATGCAGCAACGCCGCGTGAGGGATGACGGCCTTCGGGTTGTAAACCTCTTTTAGCAGGGAAGAAGCGAAAG…	1392	Actinomycetota	Actinomycetia	Micrococcales	Microbacteriaceae	Microbacterium	Microbacterium testaceum	2489	99.71	Microbacterium testaceum	Microbacterium	185
L1-12CT-G	OM164487	T19	Control/Healthy Silks	L	CO448	T	27F	1	0.000728332	TCGAACGGTGAAGCAGAGCTTGCTCTGTGGATCAGTGGCGAACGGGTGAGTAACACGTGAGCAACCTGCCCCTGACTCTGGGATAAGCGCTGGAAACGGCGTCTAATACTGGATATGAGCTGCGATCGCATGGTCAGCAGTTGGAAAGATTTTTCGGTCTGGGATGGGCTCACGGCCTATCAGCTTGTTGGTGAGGTAATGGCTCACCAAGGCGTCGACGGGTAGCCGGCCTGAGAGGGTGACCGGCCACACTGGGACTGAGACACGGCCCAGACTCCTACGGGAGGCAGCAGTGGGGAATATTGCACAATGGGCGAAAGCCTGATGCAGCAACGCCGCGTGAGGGATGACGGCCTTCGGGTTGTAAACCTCTTTTAGCAGGGAAGAAGCGAAAGTGAC…	1373	Actinomycetota	Actinomycetia	Micrococcales	Microbacteriaceae	Microbacterium	Microbacterium oleivorans	2469	99.93	Microbacterium oleivorans	Microbacterium	189
L1-2CB-H	OM302493	T27	Control/Healthy Silks	L	CO441	B	27F	4	0.00317965	two shorter sequences: CATGCAGTCGAACGATGAAGCCCAGCTTGCTGGGTGGATTAGTGGCGAACGGGTGAGTAACACGTGAGTAACCTGCCCTTAACTCTGGGATAAGCCTGGGAAACTGGGTCTAATACCGGATAGGAGCGCCTACCGCATGGTGGGTGTTGGAAAGATTTATCGGTTTTGGATGGACTCGCGGCCTATCAGCTTGTTGGTGAGGTAATGGCTCACCAAGGCGACGACGGGTAGCCGGCCTGAGAGGGTGACCGGCCACACTGGGACTGAGACACGGCCCAGACTCCTACGGGAGGCAGCAGTGGGGAATATTGCACAATGGGCGCAAGCCTGATGCAGCGACGCCGCGTGAGGGATGACGGCCTTCGGGTTGTAAACC…	618640	Actinomycetota	Actinomycetia	Micrococcales	Micrococcaceae	Micrococcus	Micrococcus aloeverae	1109/1157	98.87/99.53	Micrococcus aloeverae	Micrococcus	192
P1-12CT-F	OM302488	T28	Control/Healthy Silks	P	CO448	T	27F	16	0.0141468	two shorter sequences: ATGCAGTCGAACGGTAGCACAGAGAGCTTGCTCTCGGGTGACGAGTGGCGGACGGGTGAGTAATGTCTGGGAAACTGCCTGATGGAGGGGGATAACTACTGGAAACGGTAGCTAATACCGCATAACGTCGCAAGACCAAAGAGGGGGACCTTCGGGCCTCTTGCCATCAGATGTGCCCAGATGGGATTAGCTAGTAGGTGGGGTAACGGCTCACCTAGGCGACGATCCCTAGCTGGTCTGAGAGGATGACCAGCCACACTGGAACTGAGACACGGTCCAGACTCCTACGGGAGGCAGCAGTGGGGAATATTGCACAATGGGCGCAAGCCTGATGCAGCCATGCCGCGTGTATGAAGAAGGCCTTCGGGTTGTAAAG…	595&536	Pseudomonadota	Gammaproteobacteria	Enterobacterales	Enterobacteriaceae	0	0	946/976	98.86/99.44	Klebsiella grimontii	Klebsiella	129&130&134&135&136&138&397&407&408
L1-2CB-I	OM164489	T29	Control/Healthy Silks	L	CO441	B	27F	3	0.00222883	TTCGGGGTACTCGAGCGGCGAACGGGTGAGTAACACGTGAGTAATCTGCCCCTCACTCAGGGATAACCGCGGGAAGCTGCGGCTAATACTTGATATGACCACGTCTCGCATGGGGTGTGGTGGAAAGCGTTTAGTGGTGAGGGATGTGCTCGCGGCCTATCAGCTTGTTGGTGAGGTAGTGGCTCACCAAGGCTTCGACGGGTAGCCGGCCTGAGAGGGTGACCGGCCACACTGGGACTGAGACACGGCCCAGACTCCTACGGGAGGCAGCAGTGGGGAATATTGGACAATGGGCGAAAGCCTGATCCAGCAACGCCGCGTGAGGGATGACGGCCTTCGGGTTGTAAACCTCTTTCACCTCTGACGAAGCGCAAGTGACGGTAAGGGGAGAAGAANGGA…	1346	Actinomycetota	Actinomycetia	Propionibacteriales	Nocardioidaceae	Nocardioides	Nocardioides zeae	2466	99.78	Nocardioides zeae	Nocardioides	195
P1-2CT-I	OM164491	T33	Control/Healthy Silks	P	CO441	T	27F	19	0.0134752	ATGCAAGTCGGANGGTAGCACAGAGAGCTTGCTCTTGGGTGACGAGTGGCGGACGGGTGAGTAATGTCTGGGGATCTGCCCGATAGAGGGGGATAACCACTGGAAACGGTGGCTAATACCGCATAACGTCGCAAGACCAAAGAGGGGGACCTTCGGGCCTCTCACTATCGGATGAACCCAGATGGGATTAGCTAGTAGGCGGGGTAATGGCCCACCTAGGCGACGATCCCTAGCTGGTCTGAGAGGATGACCAGCCACACTGGAACTGAGACACGGTCCAGACTCCTACGGGAGGCAGCAGTGGGGAATATTGCACAATGGGCGCAAGCCTGATGCAGCCATGCCGCGTGTATGAAGAAGGCCTTCGGGTTGTAAAGTACTTTCAGCGGGGAGGAAGGC…	1410	Pseudomonadota	Gammaproteobacteria	Enterobacterales	Erwiniaceae	0	0	2422	97.45	Pantoea ananatis	Pantoea	223
P1-5CT-A	OM164495	T42	Control/Healthy Silks	P	CO431	T	27F	32	0.0227758	AGTTCGGANGGTAGCACAGANANCTTGCTCTCGGGTGACNAGTGNGGGANNGGTGAGTAATGTCNGGGGANCTGCCCGATAGAGGGGGANAACCACTGGAAACGGTGGCTAATACCGCATAACGTCTCAAGACCNAAGAGGGGGACCTTCTGGCCTCTCACTATCGGATGAACCCNNATGGGANTAGCTAGTATGCGGGGTANNGGCCCNCCTAGGCGACNATCCCTANCTGGTCTGAGAGGATGACCNNCCACACTGGAACTGAGACACGGTCCANANNCCTACGGGAGGCGCCACTGGGGAATATTGCGCAATGGGCGCAAGCCTGATGCANCCNTGCCCCGTGTATGAAAAANGCCTTCTGGTTGTAAAGTACTTTCTCCGGGGAGGAAAGCGATG…	1405	Pseudomonadota	Gammaproteobacteria	Enterobacterales	Erwiniaceae	0	0	2302	95.58	Pantoea agglomerans	Pantoea	243
P1-5CT-C	OM164496	T44	Control/Healthy Silks	P	CO431	T	27F	24	0.0169133	TGCAGTCGGACGGTAGCACAGAGGANCTTGCTCCTCGGGTGANGAGTGGCGGAGGGGTGAGTAGTGTNNGGGGATCNGCCCGATAGAGGGGGATAACCACTGGAAACGGTGGCTAATACCGCATAACGTCGCGAGACCAAAGAGGGGGACCTTCGGGCCTCTCACTATCGGATGAACCCANNTGGGATTAGCTAGTGGGCGGGGTANGGGCCCACCTGGGCGACNATCCCTAGCGGGTCTGAGAGGATGACCAGCCACACTGGAACTGACACACGGTCCAGACTCCTACGGGANGCAGCTGTGGGGAATATTGCACAGTGGGCGCAAGCCTGATGCANCCATGCCGCGTGTATGAANAGNGCCTTCGGGTTGTAAAGTACTTTCCGCGGGGAAGAANGC…	1419	Pseudomonadota	Gammaproteobacteria	Enterobacterales	Erwiniaceae	0	0	2355	96.2	Pantoea agglomerans	Pantoea	255
P1-5CT-F	OM164499	T47	Control/Healthy Silks	P	CO431	T	27F	28	0.0201149	GTAGCACANAGAGCTTGCTCTCGGGTGACGAGTGGCGGACGGGTGAGTAATGTCTGGGAAACTGCCCGATGGAGGGGGATAACTACTGGAAACGGTAGCTAATACCGCATAACGTCNCAAGACCAAAGTGGGGGACCTTCGGGCCTCACACCATCGGATGTGCCCAGATGGGATTAGCTAGTATGTGGGGTAATGGCTCACCTAGGCGACGATCCCTAGCTGGTCTGAGAGGATGACCAGCCACACTGGAACTGAGACACGGTCCAGACTCCTACGGGAGGCAGCAGTGGGGAATATTGCTCAATGGGCGCAAGCCTGATGCAGCCATGCCGCGTGTATGAAGAANGCCTTCNGGTTGTAAAGTACTTTCAGCGGGGAGGAAGGCGGTGAAGTTAATAG…	1392	Pseudomonadota	Gammaproteobacteria	Enterobacterales	Enterobacteriaceae	0	0	2279	95.62	Leclercia adecarboxylata	Leclercia	165
P1-5CT-I	OM164500	T49	Control/Healthy Silks	P	CO431	T	27F	22	0.0157143	TGCAGTCGGACGGTAGCACAGANAGCTTGCTCTCGGGTGACNAGTGGCGGACGGGTGAGTAATGTCTGGGGATCTGCCCGATAGAGGGGGATAACCACTGGAAACGGTGGCTAATACCGCATAACGTCTCAAGACCAAAGAGGGGGACCTTCGGGCCTCTCACTATCGGATGAACCCNGATGGGANTAGCTAGTAGGCGGGGTAATGGCCCACCTAGGCGACNATCCCTAGCTGGTCTGAGAGGATGACCAGCCACACTGGAACTGAGACACGGTCCANACTCCTACGGGAGGCNGCAGTGGGGAATATTGCNCAATGGGCGCAAGCCTGATGCANCCATGCCGCGTGTATGAAAAANGCCTTCGGGTTGTAAAGTACTTTCNNCGGGGAGGAAAGCGA…	1400	Pseudomonadota	Gammaproteobacteria	Enterobacterales	Erwiniaceae	0	0	2319	96.93	Pantoea agglomerans	Pantoea	240
P1-5CT-K	OM164514	U08	Control/Healthy Silks	P	CO431	T	27F	33	0.0245902	GTGGCNGANGGGTGANTAATGTCNGGGGATCTGCCCNATAGAGGGGGATAACCACTGGAAACTGTGGCTAATACCGCATAACCTCNCAAGACCAAAGAGGGGGACCTTCGGGCCTCTCACTATCNGATGAACCCANATGGGATTAGCTTGTACGCGGGGTAACGGCCCACCTANGCNANNATCCCTAGCGGGTCAGAGAAGATGACCNCCCACACTGGAACTGACACACNGTCCANACTCCTACGGGAGGCANCTGTGGGGAATATTGCACAATGGGCGCACGCCTGATGCANCCATGCCGCGTGTATGAANAANGCCTTCGGGTTGTAAAGTACTTTCAGCGGGGAAGAAGGCGATGTGGTTAATAACCGCATTGATTGACGTTACCCGCAGAAGANA…	1342	Bacteroidota	Flavobacteriia	Flavobacteriales	Flavobacteriaceae	0	0	2215	95.83	Flavobacterium acidificum	Flavobacterium	108
L1-2CT-K	OM241019	U36	Control/Healthy Silks	L	CO441	T	27F	32	0.0309478	GTGGTAGCGCCCTCCCGAAGGNTAAGCTACCTACTTCTTTTGCAACCCACTCCCATGGTGTGACGGGCGGTGTGTACAAGGCCCGGGAACGTATTCACCGTGGCATTCTGATCCACGATTACTAGCGATTCCGACTTCACGGAGTCGAGTTGCAGACTCCGATCCGGACTACGACGCACTTTGTGAGGTCCGCTTGCTCTCGCGAGGTCGCTTCTCTTTGTATGCGCCATTGTAGCACGTGTGTAGCCCTACTCGTAAGGGCCATGATGACTTGACGTCATCCCCACCTTCCTCCGGTTTATCACCGGCAGTCTCCTTTGAGTTCCCGACCGAATCGCTGGCAACAAAGGATAAGGGTTGCGCTCGTTGCGGGACTTAACCCAACATTTCACAACACGA…	1034	Pseudomonadota	Gammaproteobacteria	Enterobacterales	Erwiniaceae	0	0	1721	96.43	Pantoea agglomerans	Pantoea	228&230&235
L1-5CT-B	OM164524	U40	Control/Healthy Silks	L	CO431	T	27F	46	0.0325318	TGCAGTCGGANGGTAGCACANANANCNTGCTCNCNNGTGANNAGTGTCGGANNGGTGAGTAATGTCTGGGGATCTGCCCCATANAGGGGGATAACCACTGGAAACGGTGGCNAATACCGCATAACGTCTCACGACCNAAAAGGGGGACCTTCTGGCCNCTCACTATCGGATGAACCCNCATGGGATTANCTCNTATGCGGGGTAATGGCCCNCCTAGGCGACNATCCCTANCTGGTCTGAGAGGATNACCNNCCCCACTGGAACTGAGACACGGTCCCNACTCCNACGGGAGGCGCCACTGGGGAATATTGCACAATGGGCGCACGCCTGATGCACCCCTGCCCCGTGTATNAAAAAAGCNTTCTGGTTTTAAAGTATTTTCTCCGGGGANNANNGCGA…	1414	Pseudomonadota	Gammaproteobacteria	Enterobacterales	Erwiniaceae	0	0	2176	93.85	Pantoea agglomerans	Pantoea	244
L1-2CT-B	OM164538	U72	Control/Healthy Silks	L	CO441	T	27F	4	0.00286944	CATGCAGTCGNNCGGTGAAGCCAAGCTTGCTTGGTGGATCAGTGGCGAACGGGTGAGTAACACGTGAGCAACCTGCCCTGGACTCTGGGATAAGCGCTGGAAACGGCGTCTAATACTGGATATGAGACGTGATCGCATGGTCGTGTTTGGAAAGATTTTTCGGTCTGGGATGGGCTCGCGGCCTATCAGCTTGTTGGTGAGGTAATGGCTCACCAAGGCGTCGACGGGTAGCCGGCCTGAGAGGGTGACCGGCCACACTGGGACTGAGACACGGCCCAGACTCCTACGGGAGGCAGCAGTGGGGAATATTGCACAATGGGCGGAAGCCTGATGCAGCAACGCCGCGTGAGGGATGACGGCCTTCGGGTTGTAAACCTCTTTTAGCAGGGAAGAAGCGAA…	1394	Actinomycetota	Actinomycetia	Micrococcales	Microbacteriaceae	Microbacterium	Microbacterium testaceum	2485	99.5	Microbacterium testaceum	Microbacterium	186
L1-2CT-F	OM164539	U76	Control/Healthy Silks	L	CO441	T	27F	6	0.00430725	TGCAGTCGAACGGTGAAGCCAAGCTTGCTTGGTGGATCAGTGGCGAACGGGTGAGTAACACGTGAGCAACCTGCCCTGGACTCTGGGATAAGCGCTGGAAACGGCGTCTAATACTGGATATGAGACGTGATCGCATGGTCGTGTTTGGAAAGATTTTTCGGTCTGGGATGGGCTCGCGGCCTATCAGCTTGTTGGTGAGGTAATGGCTCACCAAGGCGTCGACGGGTAGCCGGCCTGAGAGGGTGACCGGCCACACTGGGACTGAGACACGGCCCAGACTCCTACGGGAGGCAGCAGTGGGGAATATTGCACAATGGGCGGAAGCCTGATGCAGCAACGCCGCGTGAGGGATGACGGCCTTCGGGTTGTAAACCTCTTTTNAGCAGGGANAGAAGCGAA…	1393	Actinomycetota	Actinomycetia	Micrococcales	Microbacteriaceae	Microbacterium	Microbacterium testaceum	2451	99.35	Microbacterium testaceum	Microbacterium	388
L1-2CT-G	OM164540	U77	Control/Healthy Silks	L	CO441	T	27F	4	0.00296736	GGATGCTGACGAGTGGCGAACGGGTGAGTAATACATCGGAACGTGCCCGATCGTGGGGGATAACGGAGCGAAAGCTTTGCTAATACCGCATACGATCTACGGATGAAAGCAGGGGACCGCAAGGCCTTGCGCGGACGGAGCGGCCGATGGCAGATTAGGTAGTTGGTGGGATAAAAGCTTACCAAGCCGACGATCTGTAGCTGGTCTGAGAGGACGACCAGCCACACTGGGACTGAGACACGGCCCAGACTCCTACGGGAGGCAGCAGTGGGGAATTTTGGACAATGGGCGAAAGCCTGATCCAGCCATGCCGCGTGCAGGATGAAGGCCTTCGGGTTGTAAACTGCTTTTGTACGGAACGAAAAGCCTCTTTCTAATAAAGAGAGGTCATGACGGTAC…	1348	Pseudomonadota	Betaproteobacteria	Burkholderiales	Comamonadaceae	Acidovorax	Acidovorax wautersii	2379	99.48	Acidovorax wautersii	Acidovorax	385
P1-12CT-G	OM164544	V07	Control/Healthy Silks	P	CO448	T	27F	7	0.00507246	TGCAGTCGAACGATGATCAGGAGCTTGCTCCTGTGATTAGTGGCGAACGGGTGAGTAACACGTGAGTAACCTGCCCCTGACTCTGGGATAAGCGTTGGAAACGACGTCTAATACTGGATATGATCACTGGCCGCATGGTCTGGTGGTGGAAAGATTTTTNGGTTGGGGATGGNNNCGCGGCCTATCAGCTTGTTGGTGAGGTAATGGCTCACCAAGGCGACGACGGGTAGCCGGCCTGAGAGGGTGACCGGCCACACTGGGACTGAGACACGGCCCAGACTCCTACGGGAGGCAGCAGTGGGGAATATTGCACAATGGGCGAAAGCCTGATGCAGCAACGCCGCGTGAGGGATGACGGCCTTCGGGTTGTAAACCTCTTTTAGTAGGGAAGAAGCGAAA…	1380	Actinomycetota	Actinomycetia	Micrococcales	Microbacteriaceae	Curtobacterium	0	2382	98.47	Curtobacterium oceanosedimentum	Curtobacterium	59
L1-2CT-O	OM164550	V52 AKA U23	Control/Healthy Silks	L	CO441	T	27F	3	0.00212164	GTCGAGCGATGATTAAAGATAGCTTGCTATTTTTATGAAGAGCGGCGAACGGGTGAGTAACGCGTGGGAAATCTGCCGAGTAGCGGGGGACAACGTTTGGAAACGAACGCTAATACCGCATAACAATGAGAATCGCATGATTCTTATTTAAAAGAAGCAATTGCTTCACTACTTGATGATCCCGCGTTGTATTAGCTAGTTGGTAGTGTAAAGGACTACCAAGGCGATGATACATAGCCGACCTGAGAGGGTGATCGGCCACACTGGGACTGAGACACGGCCCAGACTCCTACGGGAGGCAGCAGTAGGGAATCTTCGGCAATGGGGGCAACCCTGACCGAGCAACGCCGCGTGAGTGAAGAAGGTTTTCGGATCGTAAAACTCTGTTGTTAGAGAAGA…	1414	Bacillota	Bacilli	Lactobacillales	Streptococcaceae	Lactococcus	Lactococcus garvieae	2525	99.79	Lactococcus garvieae	Lactococcus	157
L1-5CT-D	OM241000	V54	Control/Healthy Silks	L	CO431	T	27F	4	0.00462963	TGCAGTCGACGGTAGCACAGAGAGCTTGCTCTCGGGTGACGAGTGGCGGACGGGTGAGTAATGTCTGGGAAACTGCCCGATGGAGGGGGATAACTACTGGAAACGGTAGCTAATACCGCATAACGTCGCAAGACCAAAGTGGGGGACCTTCGGGCCTCACACCATCGGATGTGCCCAGATGGGATTAGCTAGTAGGTGGGGTAATGGCTCACCTAGGCGACGATCCCTAGCTGGTCTGAGAGGATGACCAGCCACACTGGAACTGAGACACGGTCCAGACTCCTACGGGAGGCAGCAGTGGGGAATATTGCACAATGGGCGCAAGCCTGATGCAGCCATGCCGCGTGTATGAAGAAGGCCTTCGGGTTGTAAAGTACTTTCAGCGGGGAGGAAGGCGGT…	864	Pseudomonadota	Gammaproteobacteria	Enterobacterales	Erwiniaceae	0	0	1500	97.81	Erwinia persicina	Erwinia	88
P1-17CT-F (Group)	OM164551	V61	Control/Healthy Silks	P	P35837	T	27F	2	0.00146843	TGCAGTCGAACGGTGAAGCCAGCTTGCTTGGTGGATCAGTGGCGAACGGGTGAGTAACACGTGAGCAACCTGCCCTGGACTCTGGGATAAGCGCTGGAAACGGTGTCTAATACTGGATATGAGGCGTGATCGCATGGTCATGTTTGGAAAGATTTTTCGGTCTGGGATGGGCTCGCGGCCTATCAGCTTGTTGGTGAGGTAATGGCTCACCAAGGCGTCGACGGGTAGCCGGCCTGAGAGGGTGACCGGCCACACTGGGACTGAGACACGGCCCAGACTCCTACGGGAGGCAGCAGTGGGGAATATTGCACAATGGGCGCAAGCCTGATGCAGCAACGCCGCGTGAGGGATGACGGCCTTCGGGTTGTAAACCTCTTTTAGCAGGGAAGAAGCGTGAGT…	1362	Actinomycetota	Actinomycetia	Micrococcales	Microbacteriaceae	Microbacterium	Microbacterium zeae	2432	99.71	Microbacterium zeae	Microbacterium	180
L1-17ET-G1-Y	OM164111	3	Experimental/Fg-treated Silks	L	P35837	T	799F	1	0.00140845	TACGACTTCACCCCAGTCATGAATCACACCGTGGTAACCGTCCTCCCGAGGGTTAGACTAGCTACTTCTGGTGCAACCCACTCCCATGGTGTGACGGGCGGTGTGTACAAGGCCCGGGAACGTATTCACCGCGACATTCTGATTCGCGATTACTAGCGATTCCGACTTCACGCAGTCGAGTTGCAGACTGCGATCCGGACTACGATCGGTTTTGTGAGATTAGCTCCACCTCGCGGCTTGGCGACCCTCTGTACCGACCATTGTAGCACGTGTGTAGCCCAGGCCGTAAGGGCCATGATGACTTGACGTCATCCCCACCTTCCTCCGGTTTGTCACCGGCAGTCTCCTTAGAGTGCCCACCATAACGTGCTGGTAACTAAGGACAAGGGTTGCGCTCGT…	710	Pseudomonadota	Gammaproteobacteria	Pseudomonadales	Pseudomonadaceae	Pseudomonas	Pseudomonas cremoricolorata	1273	99.72	Pseudomonas cremoricolorata	Pseudomonas	310
L1-17ET-G1-X	OM164113	5	Experimental/Fg-treated Silks	L	P35837	T	799F	3	0.00423729	TACGACTTCACCCCAGTCACGAACCCCGCCGTGGTAAGCGCCCTCCTTGCGGTTAGGCTACCTACTTCTGGCGAGACCCGCTCCCATGGTGTGACGGGCGGTGTGTACAAGACCCGGGAACGTATTCACCGCGGCATGCTGATCCGCGATTACTAGCGATTCCGACTTCACGCAGTCGAGTTGCAGACTGCGATCCGGACTACGACTGGTTTTATGGGATTAGCTCCCCCTCGCGGGTTGGCAACCCTCTGTACCAGCCATTGTATGACGTGTGTAGCCCCACCTATAAGGGCCATGAGGACTTGACGTCATCCCCACCTTCCTCCGGTTTGTCACCGGCAGTCTCATTAGAGTGCCCAACTAAATGTAGCAACTAATGACAAGGGTTGCGCTCGTTGC…	708	Pseudomonadota	Betaproteobacteria	Burkholderiales	Comamonadaceae	Delftia	Delftia acidovorans	1262	99.44	Delftia acidovorans	Delftia	64&70
L1-16EB-S-Y	OM164117	11	Experimental/Fg-treated Silks	L	CO462	B	799F	0	0	ACCTTTGTTACGACTTCACCCCAGTCATCGGCCACACCGTGGCAAGCGCCCTCCCGAAGGTTAAGCTACCTGCTTCTGGTGCAACAAACTCCCATGGTGTGACGGGCGGTGTGTACAAGGCCCGGGAACGTATTCACCGCAGCAATGCTGATCTGCGATTACTAGCGATTCCGACTTCATGGAGTCGAGTTGCAGACTCCAATCCGGACTGAGATAGGGTTTCTGGGATTGGCTTACCGTCGCCGGCTTGCAGCCCTCTGTCCCTACCATTGTAGTACGTGTGTAGCCCTGGCCGTAAGGGCCATGATGACTTGACGTCATCCCCACCTTCCTCCGGTTTGTCACCGGCGGTCTCCTTAGAGTTCCCACCATTACGTGCTGGCAACTAAGGACAAGGGT…	720	Pseudomonadota	Gammaproteobacteria	Xanthomonadales	Xanthomonadaceae	Stenotrophomonas	0	1289	99.86	Stenotrophomonas pavanii	Stenotrophomonas	374&375
L1-16EB-M-Y	OM164119	13	Experimental/Fg-treated Silks	L	CO462	B	799F	6	0.00934579	GTTGGGTGCATTTGGCACGCAGTATCGAAGCTAACGCGTTAAGTTCGCCGCCTGGGGAGTACGGTCGCAAGACTGAAACTCAAAGGAATTGACGGGGGCCCGCACAAGCGGTGGAGTATGTGGTTTAATTCGATGCAACGCGAAGAACCTTACCTGGCCTTGACATGTCGAGAACTTTCCAGAGATGGATCGGTGCCTTCGGGAACTCGAACACACGTGNCGNTGCATGGCTGTCGTNNCAGCTCGTCTCGTGAGACCTTGGGTTAAGTCCCGCAACCAGCGCAACCCTTGTCCTTAGTTGCCAGCACNTAATGGTGGGAACTCTAAGGAGACCGCCGGTGACNAAACCGGAGGAAGGTGGGGATGACGTCAAGTCATCATGGCCCTTACGGCCAGGGC…	642	Pseudomonadota	Gammaproteobacteria	Xanthomonadales	Xanthomonadaceae	0	0	1081	97.66	Stenotrophomonas pavanii	Stenotrophomonas	368
L1-17ET-G1-Z	OM262844	2 AKA E06 AKA J01 AKA J20	Experimental/Fg-treated Silks	L	P35837	T	799F	0	0	TGGTAGTCCACGCCGTAAACGATGTCGACTTGGAGGTTGTGCCCTTGAGGCGTGGCTTCCGGAGCTAACGCGTTAAGTCGACCGCCTGGGGAGTACGGCCGCAAGGTTAAAACTCAAATGAATTGACGGGGGCCCGCACAAGCGGTGGAGCATGTGGTTTAATTCGATGCAACGCGAAGAACCTTACCTACTCTTGACATCCAGAGAACTTAGCAGAGATGCTTTGGTGCCTTCGGGAACTCTGAGACAGGTGCTGCATGGCTGTCGTCAGCTCGTGTTGTGAAATGTTGGGTTAAGTCCCGCAACGAGCGCAACCCTTATCCTTTGTTGCCAGCGGTTCGGCCGGGAACTCAAAGGAGACTGCCAGTGATAAACTGGAGGAAGGTGGGGATGACGTCA…	704	Pseudomonadota	Gammaproteobacteria	Enterobacterales	Enterobacteriaceae	0	0	1266	99.86	Klebsiella aerogenes/Kluyvera cryocrescens*	Klebsiella/Kluyvera*	118&119&121&122&125&124&149
L1-16EB-S-Z	OM164133	B13	Experimental/Fg-treated Silks	L	CO462	B	799F	0	0	ACGACTTCACCCCAGTCATGAATCACAAAGTGGTAAGCGCCCTCCCGAAGGTTAAGCTACCTACTTCTTTTGCAACCCACTCCCATGGTGTGACGGGCGGTGTGTACAAGGCCCGGGAACGTATTCACCGTAGCATTCTGATCTACGATTACTAGCGATTCCGACTTCATGGAGTCGAGTTGCAGACTCCAATCCGGACTACGACATACTTTATGAGGTCCGCTTGCTCTCGCGAGGTCGCTTCTCTTTGTATATGCCATTGTAGCACGTGTGTAGCCCTGGTCGTAAGGGCCATGATGACTTGACGTCATCCCCACCTTCCTCCAGTTTATCACTGGCAGTCTCCTTTGAGTTCCCGGCCTAACCGCTGGCAACAAAGGATAAGGGTTGCGCTCGTTG…	701	Pseudomonadota	Gammaproteobacteria	Enterobacterales	Enterobacteriaceae	0	0	1260	99.86	Klebsiella pneumoniae	Klebsiella	142&144
L1-16EB-M-X	OM164134	B15	Experimental/Fg-treated Silks	L	CO462	B	799F	11	0.0141753	GACTTCACCCCAGTCATCGGCCACACCGTGGCAAGCGCCCTCCCGAAGGTTAAGCTACCTGCTTCTGGTGCAACAAACTCCCATGGTGTGACGGGCGGTGTGTACAAGGCCCGGGAACGTATTCACCGCAGCAATGCTGATCTGCGATTACTAGCGATTCCGACTTCATGGAGTCGAGTTGCAGACTCCAATCCGGACTGAGATAGGGTTTCTGGGATTGGCTTACCGTCGCCGGCTTGCAGCCCTCTGTCCCTACCATTGTAGTACGTGTGTAGCCCTGGCCGTAAGGGCCATGATGACTTGACGTCATCCCCACCTTCCTCCGGTTTGTCACCGGCGGTCTCCTTAGAGTTCCCACCATTACGTGCTGGCAACTAAGGACAAGGGTTGCGCTCGTTG…	776	Pseudomonadota	Gammaproteobacteria	Xanthomonadales	Xanthomonadaceae	Stenotrophomonas	0	1269	99.72	Stenotrophomonas pavanii/Stenotrophomonas humi/Stenotrophomonas maltophilia*	Stenotrophomonas	372&373&374&375
L1-16EB-S-X	OM262824	B18	Experimental/Fg-treated Silks	L	CO462	B	799F	1	0.00161551	GTTGGGTGCATTTGGCACGCAGTATCGAAGCTAACGCGTTAAGTTCGCCGCCTGGGGAGTACGGTCGCAAGACTGAAACTCAAAGGAATTGACGGGGGCCCGCACAAGCGGTGGAGTATGTGGTTTAATTCGATGCAACGCGAAGAACCTTACCTGGCCTTGACATGTCGAGAACTTTCCAGAGATGGATCGGTGCCTTCGGGAACTCGAACACAGGTGCTGCATGGCTGTCGTCAGCTCGTGTCGTGAGATGTTGGGTTAAGTCCCGCAACGAGCGCAACCCTTGTCCTTAGTTGCCAGCACGTAATGGTGGGAACTCTAANGAGACCGCCGGTGACAAACCGGAGGAAGGTGGGGATGACGTCAAGTCATCATGGCCCTTACGGCCAGGGCTACACA…	619	Pseudomonadota	Gammaproteobacteria	Xanthomonadales	Xanthomonadaceae	Stenotrophomonas	0	1104	99.52	Stenotrophomonas pavanii/Stenotrophomonas maltophilia/Stenotrophomonas tumulicola,etc.*	Stenotrophomonas	371&372&373&374&375
L1-18EB-100-Z	OM262836	C05	Experimental/Fg-treated Silks	L	P38157	B	799F	1	0.00142653	GANTTCACCCCAGTCATGAATCACAAAGTGGTAAGCGCCCTCCCGAAGGTTAAGCTACCTACTTCTTTTGCAACCCACTCCCATGGTGTGACGGGCGGTGTGTACAAGGCCCGGGAACGTATTCACCGTGGCATTCTGATCCACGATTACTAGCGATTCCGACTTCATGGAGTCGAGTTGCAGACTCCAATCCGGACTACGACATACTTTATGAGGTCCGCTTGCTCTCGCGAGGTCGCTTCTCTTTGTATATGCCATTGTAGCACGTGTGTAGCCCTACTCGTAAGGGCCATGATGACTTGACGTCATCCCCACCTTCCTCCAGTTTATCACTGGCAGTCTCCTTTGAGTTCCCGGCCGGACCGCTGGCAACAAAGGATAAGGGTTGCGCTCGTTGCG…	701	Pseudomonadota	Gammaproteobacteria	Enterobacterales	Enterobacteriaceae	0	0	1248	99.43	Raoultella planticola/Klebsiella oxytoca/Citrobacter murliniae/Citrobacter braakii*	Klebsiella,Raoultella,Citrobacter*	129&130&136&397
L1-18EB-100-Y	OM164139	C06	Experimental/Fg-treated Silks	L	P38157	B	799F	0	0	GACTTCACCCCAGTCATGAATCACAAAGTGGTAAGCGCCCTCCCGAAGGTTAAGCTACCTACTTCTTTTGCAACCCACTCCCATGGTGTGACGGGCGGTGTGTACAAGGCCCGGGAACGTATTCACCGTGGCATTCTGATCCACGATTACTAGCGATTCCGACTTCACGGAGTCGAGTTGCAGACTCCGATCCGGACTACGACGCACTTTATGAGGTCCGCTTGCTCTCGCGAGGTCGCTTCTCTTTGTATGCGCCATTGTAGCACGTGTGTAGCCCTACTCGTAAGGGCCATGATGACTTGACGTCATCCCCACCTTCCTCCGGTTTATCACCGGCAGTCTCCTTTGAGTTCCCGACCGAATCGCTGGCAACAAAGGATAAGGGTTGCGCTCGTTGCG…	702	Pseudomonadota	Gammaproteobacteria	Enterobacterales	Erwiniaceae	Pantoea	0	1258	99.72	Pantoea anthophila/Pantoea ananatis*	Pantoea	288
L1-18EB-100-X	OM164143	C11	Experimental/Fg-treated Silks	L	P38157	B	799F	8	0.0110193	TACCCNNNGTANGACTTCACCCCAGTCATCGGCCACACCGTGGCAAGCGCCCTCCCGAAGGTTAAGCTACCTGCTTCTGGTGCAACAAACTCCCATGGTGTGACGGGCGGTGTGTACAAGGCCCGGGAACGTATTCACCGCAGCAATGCTGATCTGCGATTACTAGCGATTCCGACTTCATGGAGTCGAGTTGCAGACTCCAATCCGGACTGAGATAGGGTTTCTGGGATTGGCTTACCGTCGCCGGCTTGCAGCCCTCTGTCCCTACCATTGTAGTACGTGTGTAGCCCTGGCCGTAAGGGCCATGATGACTTGACGTCATCCCCACCTTCCTCCGGTTTGTCACCGGCGGTCTCCTTAGAGTTCCCACCATTACGTGCTGGCAACTAAGGACAAGGG…	726	Pseudomonadota	Gammaproteobacteria	Xanthomonadales	Xanthomonadaceae	Stenotrophomonas	0	1258	98.74	Stenotrophomonas pavanii/Stenotrophomonas humi/Stenotrophomonas maltophilia*	Stenotrophomonas	372&373&374&375
L1-8EB-M-Z	OM302496	E05	Experimental/Fg-treated Silks	L	CO325	B	799F	7	0.0106383	two shorter sequences: TTGTGCCCTTGAGGCGTGGCTTCCGGAGCTAACGCGTTAAGTCGACCGCCTGGGGAGTACGGCCGCAAGGTTAAAACTCAAATGAATTGACGGGGGCCCGCACAAGCGGTGGAGCATGTGGTTTAATTCGATGCAACGCGAAGAACCTTACCTACTCTTGACATCCAGAGAACTTTCCAGAGATGGATTGGTGCCTTCGGGAACTCTNANACAGGTGCTGCATGGCTGTCGTCAGCTCGTGTTGTGAAATGTTGGGTTAAGTCCCGCAACNAGCGCNACCCTTATCCTTTGTTGCC / TGGTAGCGCCCTCCCGAAGGTTAAGCTACCTACTTCTTTTGCAACCCACTCCCATGGTGTGACGGGCGGTGTGTACA…	296&362	Pseudomonadota	Gammaproteobacteria	Enterobacterales	Enterobacteriaceae	0	0	532/647	98.65/98.62	Enterobacter ludwigii	Enterobacter	201&78&200
L1-12EB-U	OM262841	F07	Experimental/Fg-treated Silks	L	CO448	B	799F	4	0.00550206	TACCTNNTTACGACTTCACCCCAGTCATGAATCACAAAGTGGTAAGCGCCCTCCCGAAGGTTAAGCTACCTACTTCTTTTGCAACCCACTCCCATGGTGTGACGGGCGGTGTGTACAAGGCCCGGGAACGTATTCACCGTGACATTCTGATTCACGATTACTAGCGATTCCGACTTCATGGAGTCGAGTTGCAGACTCCAATCCGGACTACGACGCACTTTATGAGGTCCGCTTGCTCTCGCGAGATTGCTTCTCTTTGTATGCGCCATTGTAGCACGTGTGTAGCCCTGGTCGTAAGGGCCATGATGACTTGACGTCATCCCCACCTTCCTCCAGTTTATCACTGGCAGTCTCCTTTGAGTTCCCGGCCTGACCGCTGGCAACAAAGGATAAGGGTTG…	727	Pseudomonadota	Gammaproteobacteria	Enterobacterales	Enterobacteriaceae	0	0	1250	98.21	Kosakonia radicincitans/Atlantibacter hermannii/Kosakonia oryzae*	Kosakonia/Atlanitibacter*	153&403
L1-12EB-Y	OM164180	F09	Experimental/Fg-treated Silks	L	CO448	B	799F	1	0.0014556	GTAACCGTCCCCCCGAAGGTTAGACTAGCTACTTCTGGTGCAACCCACTCCCATGGTGTGACGGGCGGTGTGTACAAGGCCCGGGAACGTATTCACCGCGACATTCTGATTCGCGATTACTAGCGATTCCGACTTCACGCAGTCGAGTGGCAGACTGCGATCCGGACTACGATCGGTTTTATGGGATTAGCTCCACCTCGCGGCTTGGCAACCCTCTNGTACCGACCATTGTAGCACGTGTGTAGCCCAGGCCGTAAGGGCCATGATGACTTGACGTCATCCCCACCTTCCTCCGGTTTGTCACCGGCAGTCTCCTTAGAGTGCCCACCATTACGTGCTGGTAACTAAGGACAAGGGTTGCGCTCGTTACGGGACTTAACCCAACATCTCACGACACGA…	687	Pseudomonadota	Gammaproteobacteria	Pseudomonadales	Pseudomonadaceae	Pseudomonas	Pseudomonas rhodesiae	1205	99.13	Pseudomonas rhodesiae	Pseudomonas	318
L1-12EB-Z	OM164181	F10	Experimental/Fg-treated Silks	L	CO448	B	799F	0	0	CGACTTCACCCCAGTCATGAATCACACCGTGGTAACCGTCCCCCCGAAGGTTAGACTAGCTACTTCTGGTGCAACCCACTCCCATGGTGTGACGGGCGGTGTGTACAAGGCCCGGGAACGTATTCACCGCGACATTCTGATTCGCGATTACTAGCGATTCCGACTTCACGCAGTCGAGTTGCAGACTGCGATCCGGACTACGATCGGTTTTATGGGATTAGCTCCACCTCGCGGCTTGGCAACCCTCTGTACCGACCATTGTAGCACGTGTGTAGCCCAGGCCGTAAGGGCCATGATGACTTGACGTCATCCCCACCTTCCTCCGGTTTGTCACCGGCAGTCTCCTTAGAGTGCCCACCATTACGTGCTGGTAACTAAGGACAAGGGTTGCGCTCGTTA…	718	Pseudomonadota	Gammaproteobacteria	Pseudomonadales	Pseudomonadaceae	Pseudomonas	Pseudomonas rhodesiae	1327	100	Pseudomonas rhodesiae	Pseudomonas	320
L1-17EB-X	OM164182	F11	Experimental/Fg-treated Silks	L	P35837	B	27F	0	0	TGCAGTCGAGCGGATGAGAAGAGCTTGCTCTTCGATTCAGCGGCGGACGGGTGAGTAATGCCTAGGAATCTGCCTGGTAGTGGGGGACAACGTTTCGAAAGGAACGCTAATACCGCATACGTCCTACGGGAGAAAGCAGGGGACCTTCGGGCCTTGCGCTATCAGATGAGCCTAGGTCGGATTAGCTAGTTGGTGGGGTAATGGCTCACCAAGGCGACGATCCGTAACTGGTCTGAGAGGATGATCAGTCACACTGGAACTGAGACACGGTCCAGACTCCTACGGGAGGCAGCAGTGGGGAATATTGGACAATGGGCGAAAGCCTGATCCAGCCATGCCGCGTGTGTGAAGAAGGTCTTCGGATTGTAAAGCACTTTAAGTTGGGAGGAAGGGCAGTAA…	1402	Pseudomonadota	Gammaproteobacteria	Pseudomonadales	Pseudomonadaceae	Pseudomonas	Pseudomonas oryzihabitans	2488	99.43	Pseudomonas oryzihabitans	Pseudomonas	310
L1-17EB-Z	OM164183	F12	Experimental/Fg-treated Silks	L	P35837	B	799F	22	0.0331325	GTGGTAGCGCCCTCCCGAAGNGTTAAGCTACCTACTTCTATTGCAACCCCACTCCCACGGCGTGACGGGCAGTGTGTACAANGGCCCGGAAGAACATATTCACCGTAGCATTCTGNATCTACGAGTAGCTAGCGATTCCAACTTCAGGGAGTCGNAGGGGCAGANNCTNNCCAATNCCGGACTACGACCCACNNNNTTTCATGAGGTCCGCTTGCTCTNNCGCGAGGTCGCTTCTCTTNNTGTATGCGCCATTGTAGCACGTGTGTAGCCCTACTCGTAAAGGCCATGATGACTTGACGTCATCCCCACCTTCCTCCAGTTTANTCACTGCCAGTCTCCTTCTNNGAGGTTCCCGGCCGAANCNGCTGGCAACAAAGGATAAGGGTTGCGCTCGTTGCG…	664	Pseudomonadota	Gammaproteobacteria	Enterobacterales	Enterobacteriaceae	0	0	965	93.53	Enterobacter tabaci/ Cedecea davisae	Enterobacter/ Cedecea	82
[truncated: 129 more rows]
